# Supplementary material for: Quantitative protein mass-spectrometry requires a standardized pre-analytical phase
Source: publisher site journal article supplement (doi:10.1515/cclm-2022-0735), 2022-09-07
Supplement: Supplementary file 1 [file j_cclm-2022-0735_suppl.docx]

Supplementary information associated with

**Quantitative Protein Mass-Spectrometry Requires a Standardized Pre-Analytical Phase.**

Nico P.M. Smit1, Fred P.H.T.M. Romijn1, Vanessa J.J. van Ham2, Esther Reijnders1, Christa M. Cobbaert1, L. Renee Ruhaak1

1Department of Clinical Chemistry and Laboratory Medicine and 2Biobank Facility, Leiden University Medical Center, Leiden, The Netherlands

Contents:

Table ST1: Blood collection tubes

Table ST2: Apolipoprotein dMRM specification

Figure S1: (a) Matrix and (b) peptide comparisons of additional peptides

Table ST3: Calculated TE values Apos based on bias and EP15 imprecision

Figure S2: Difference plots for matrix comparisons

Table ST4A,B: Statistics One Way Anova matrix comparisons

Figure S3 and Table ST5; ITA measurement for ApoA-I and ApoB, matrix comparison

Figure S4; Digestion kinetics 9 apolipoproteins

Table ST6; Digestion kinetics at 3 hours

| Tube Code | Tube Type | Gel | Volume (ml) | BD ref. | n | % male |
| --- | --- | --- | --- | --- | --- | --- |
| 3B | Plasma, sodium citrate (9NC) | no | 2.7 | # 363048 | 44 | 32 |
| 4A | Serum, clot activator tube (CAT) | no | 4 | # 369032 | 44 | 32 |
| 5B | Serum, separator tubes (SST) | yes | 3.5 | # 367957 | 44 | 32 |
| 6B | Plasma, lithium heparin (LHPST) | yes | 3 | # 367374 | 44 | 32 |
| 7B | Plasma, K2EDTA (K2E) | no | 4 | # 368861 | 43 | 33 |
| PIC | Plasma, K2E + protease inhibitor (PIC) | no | 2 | # 366422 | 44 | 32 |

**Table ST1.** Beckton Dickinson blood collection tubes.

For all blood tubes 44 donors were measured in duplicate, except for the 7B (K2EDTA) tubes (one missing sample n=43).

For all blood tubes 44 donors were measured in duplicate, except for the 7B (K2EDTA) tubes (one missing sample n=43).

| Apo | Peptide | Prec m/z | CE (V) | Ion 1 | CE (V) | Ion 2 | CE (V) | Ion 3 | Rt (min) |
| --- | --- | --- | --- | --- | --- | --- | --- | --- | --- |
| A-I | AKPA**L**EDLR | 338.2 | 14 | 288.2 | 5 | 532.4 | 5 | 403.2 | 6.8 |
|  | **V**QPYLDDFQK | 626.8 | 15 | 228.1 | 15 | 1025.5 | 25 | 765.4 | 9.3 |
| *(a)* | LFLEPTQADIALL**K** | 786.4 | 25 | 1069.6 | 25 | 1198.7 | 25 | 374.2 | 13.3 |
|  | GISSTTVTG**R** | 489.8 | 15 | 808.4 | 15 | 634.4 | 15 | 533.3 | 5.9 |
|  | GTYSTTVTG**R** | 521.8 | 20 | 634.4 | 20 | 721.5 | 20 | 533.3 | 5.3 |
| *A-II* | SPELQAEA**K** | 486.7 | 18 | 443.2 | 18 | 788.4 | 18 | 659.4 | 5.2 |
|  | EQLTPLI**K** | 471.2 | 15 | 571.4 | 15 | 684.5 | 25 | 260.2 | 9.9 |
| *A-IV* | LEPYADQL**R** | 552.8 | 15 | 431.7 | 25 | 602.3 | 15 | 243.1 | 8.1 |
|  | LTPYADEF**K** | 542.2 | 12 | 435.2 | 25 | 609.3 | 12 | 215.1 | 8.8 |
|  | SLAPYAQDTQE**K** | 675.8 | 18 | 540.3 | 18 | 575.8 | 25 | 201.1 | 6.8 |
| B | TGISP**L**ALIK | 506.8 | 15 | 741.5 | 15 | 654.5 | 15 | 272.2 | 12.4 |
|  | TEVIPP**L**IENR | 640.9 | 15 | 838.5 | 15 | 443.2 | 15 | 330.2 | 11.4 |
| B100 | FPE**V**DVLTK | 524.3 | 18 | 450.8 | 18 | 900.5 | 18 | 803.5 | 11.2 |
| C-I | EFGNT**L**EDK | 526.7 | 15 | 605.3 | 15 | 776.5 | 15 | 391.2 | 7.0 |
|  | TPDVSSA**L**DK | 516.8 | 19 | 466.2 | 19 | 834.4 | 19 | 620.3 | 7.6 |
| C-II | ES**L**SSYWESAK | 643.8 | 19 | 957.4 | 19 | 870.4 | 19 | 783.4 | 9.6 |
|  | TYLPA**V**DEK | 518.3 | 15 | 265.1 | 15 | 771.4 | 15 | 658.3 | 8.4 |
| C-III | GWVTDGFSS**L**K | 598.8 | 18 | 244.1 | 15 | 953.5 | 15 | 854.4 | 11.3 |
|  | DALSSVQESQ**V**AQQAR | 572.9 | 15 | 502.2 | 12 | 300.2 | 15 | 672.4 | 8.8 |
| E | SELEEQLTP**V**AEETR | 577.6 | 15 | 801.4 | 12 | 829.4 | 20 | 605.2 | 10.0 |
|  | LGP**L**VQGR | 484.8 | 20 | 588.3 | 20 | 701.4 | 18 | 489.2 | 7.8 |
| E34 | LA**V**YQAGAR | 474.8 | 14 | 665.3 | 14 | 764.4 | 14 | 502.3 | 6.7 |
| E2 | C[cm]LAVYQAGA**R** | 554.8 | 20 | 835.4 | 20 | 764.4 | 20 | 665.3 | 7.3 |
| E4 | LGADMEDV**R** | 503.2 | 20 | 764.3 | 20 | 649.3 | 20 | 518.3 | 7.5 |
| E23 | LGADMEDVC[cm]G**R** | 611.8 | 20 | 735.3 | 20 | 981.4 | 20 | 866.3 | 7.9 |

**Table ST2.** M/z values, retention times (Rt) and collision energies (CE) for the 3 MRM transitions measured for 22 peptides of 9 apolipoproteins as published earlier for 6 apos (4). Apo(a), A-II and A-IV were newly added in the MRM-MS/MS measurements of the multiplex apolipoproteins. Bold and underlined amino acids indicate labeled Valine (+6), Leucine (+7), Lysine (+8) or Arginine (+10) in the corresponding SIL peptides (measured with identical transitions with correction for expected mass shift). [cm] Represents the carbamydomethylation of the cysteine causing a +57 mass shift. E2, E3 and E4 indicates the apoE isoforms where the peptides will be encountered.

Matrix comparisons.


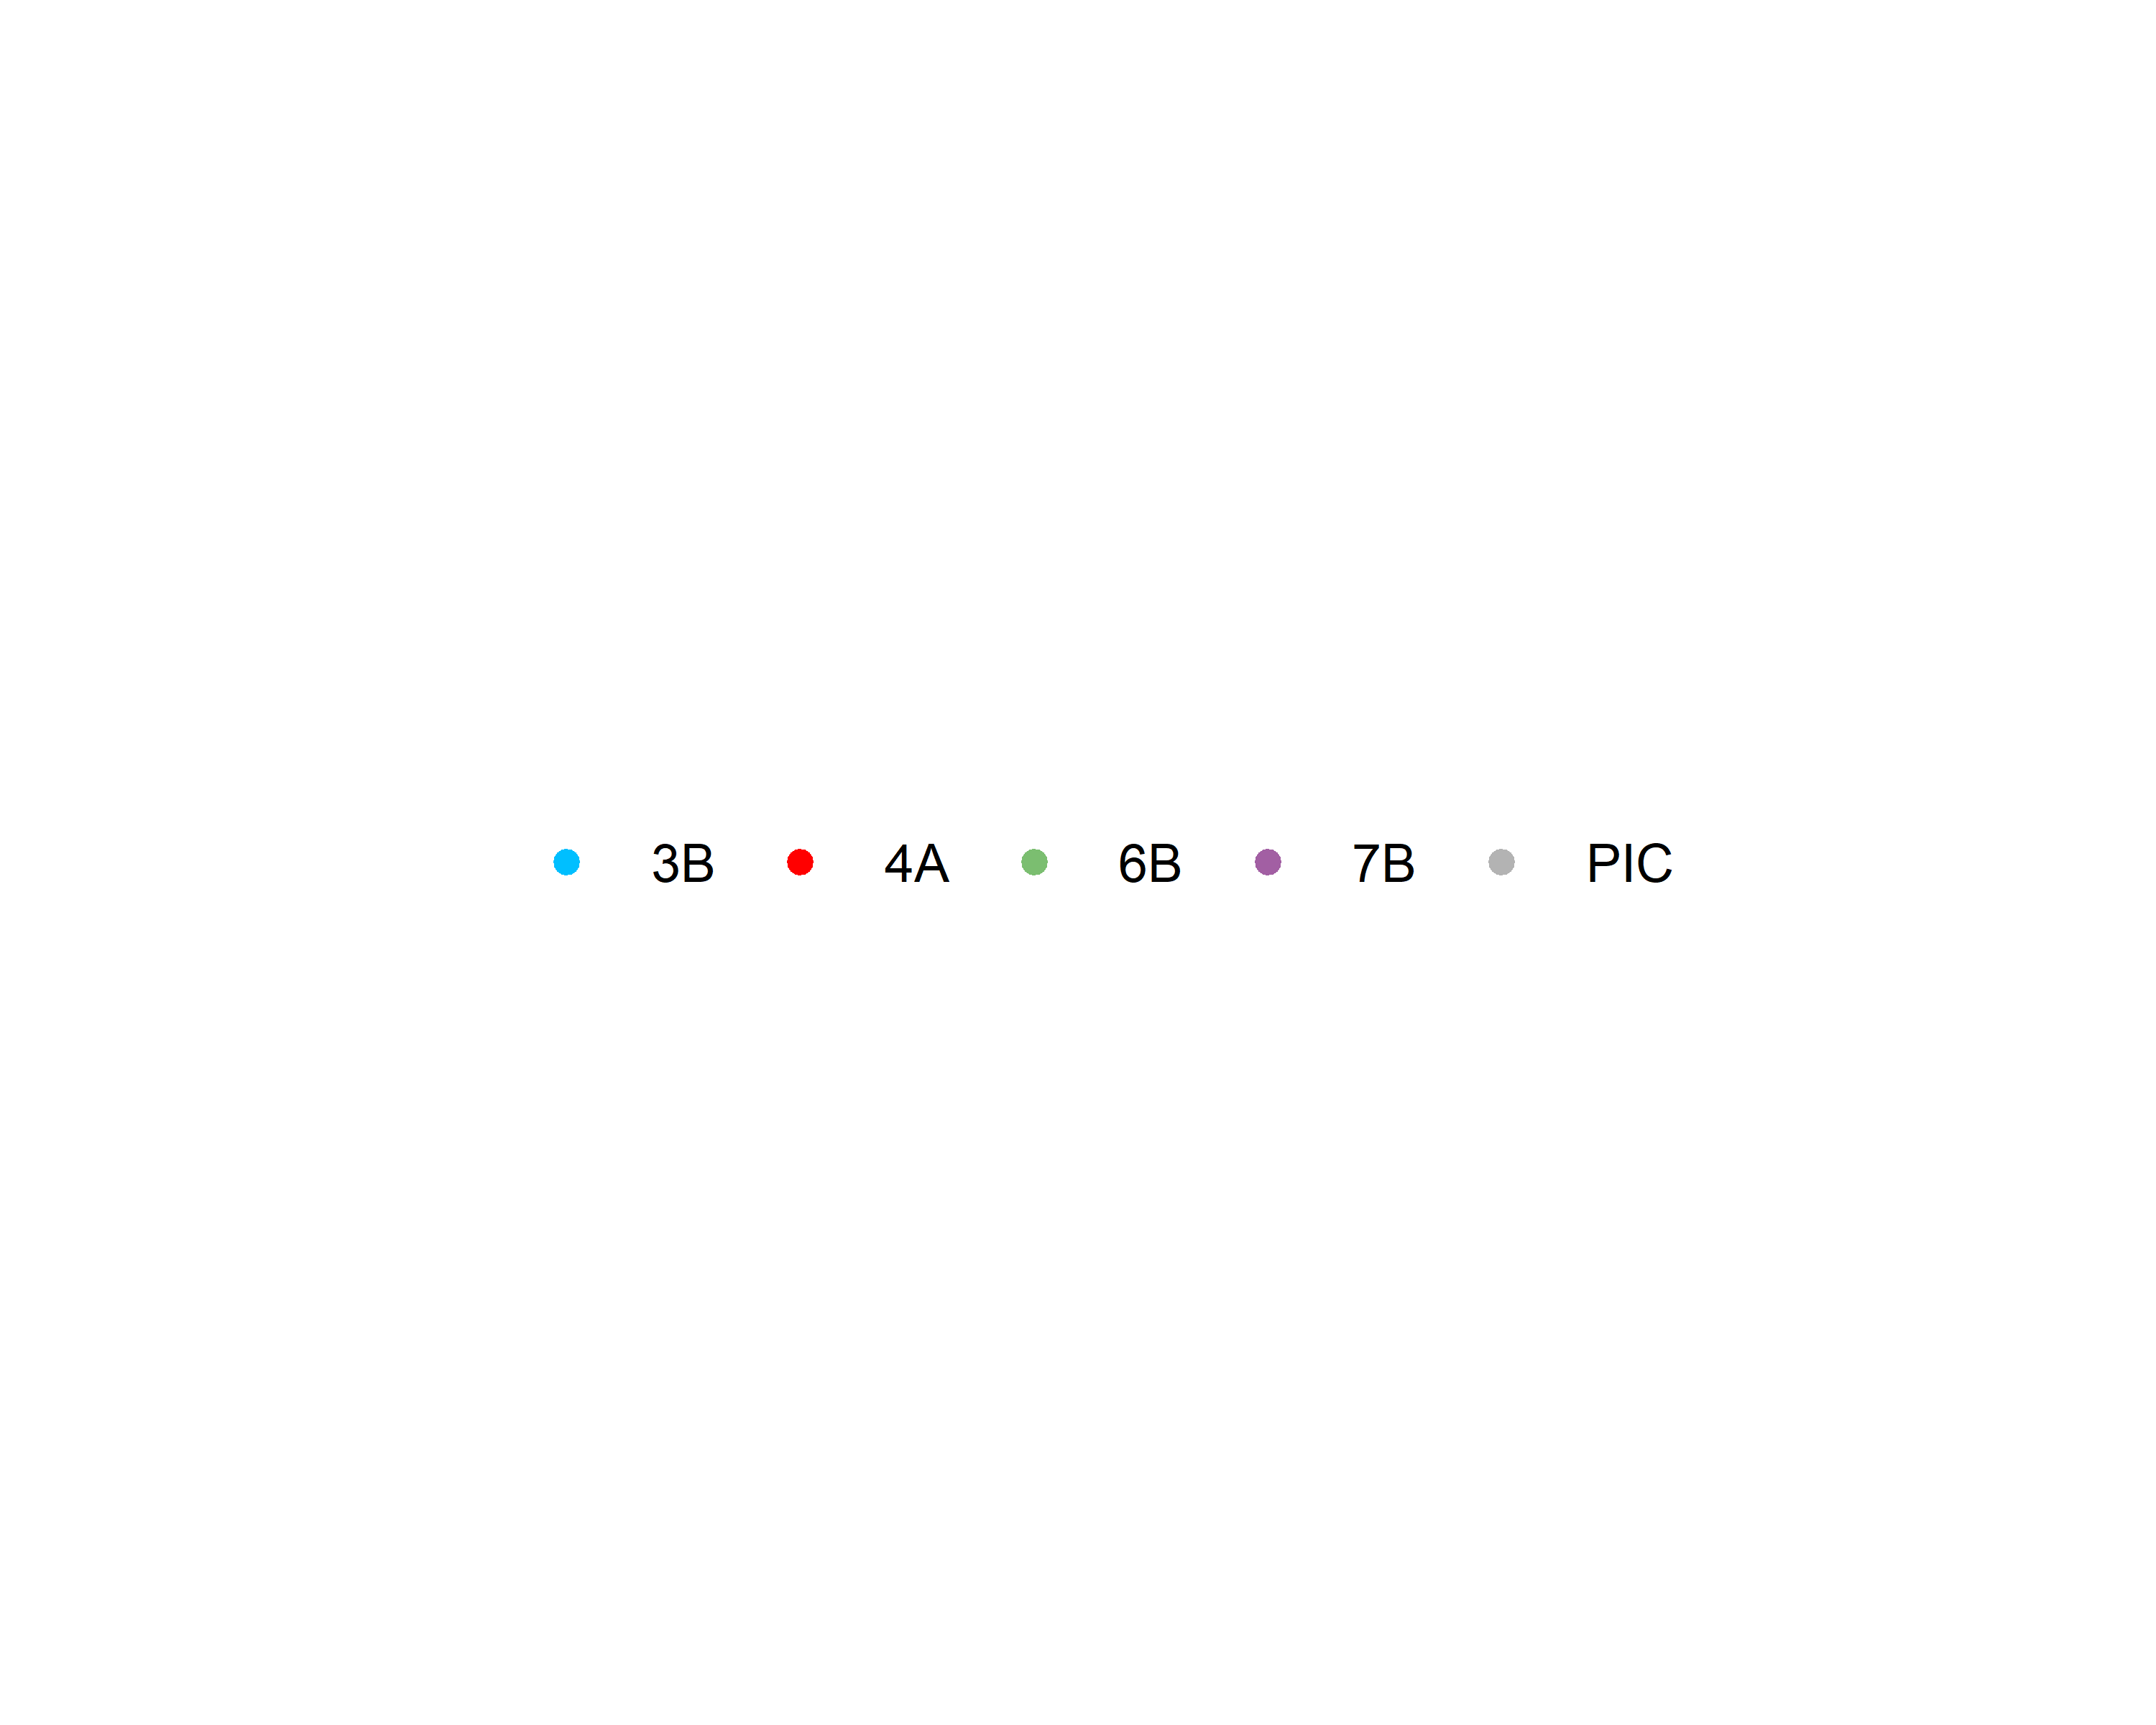


S1(A)


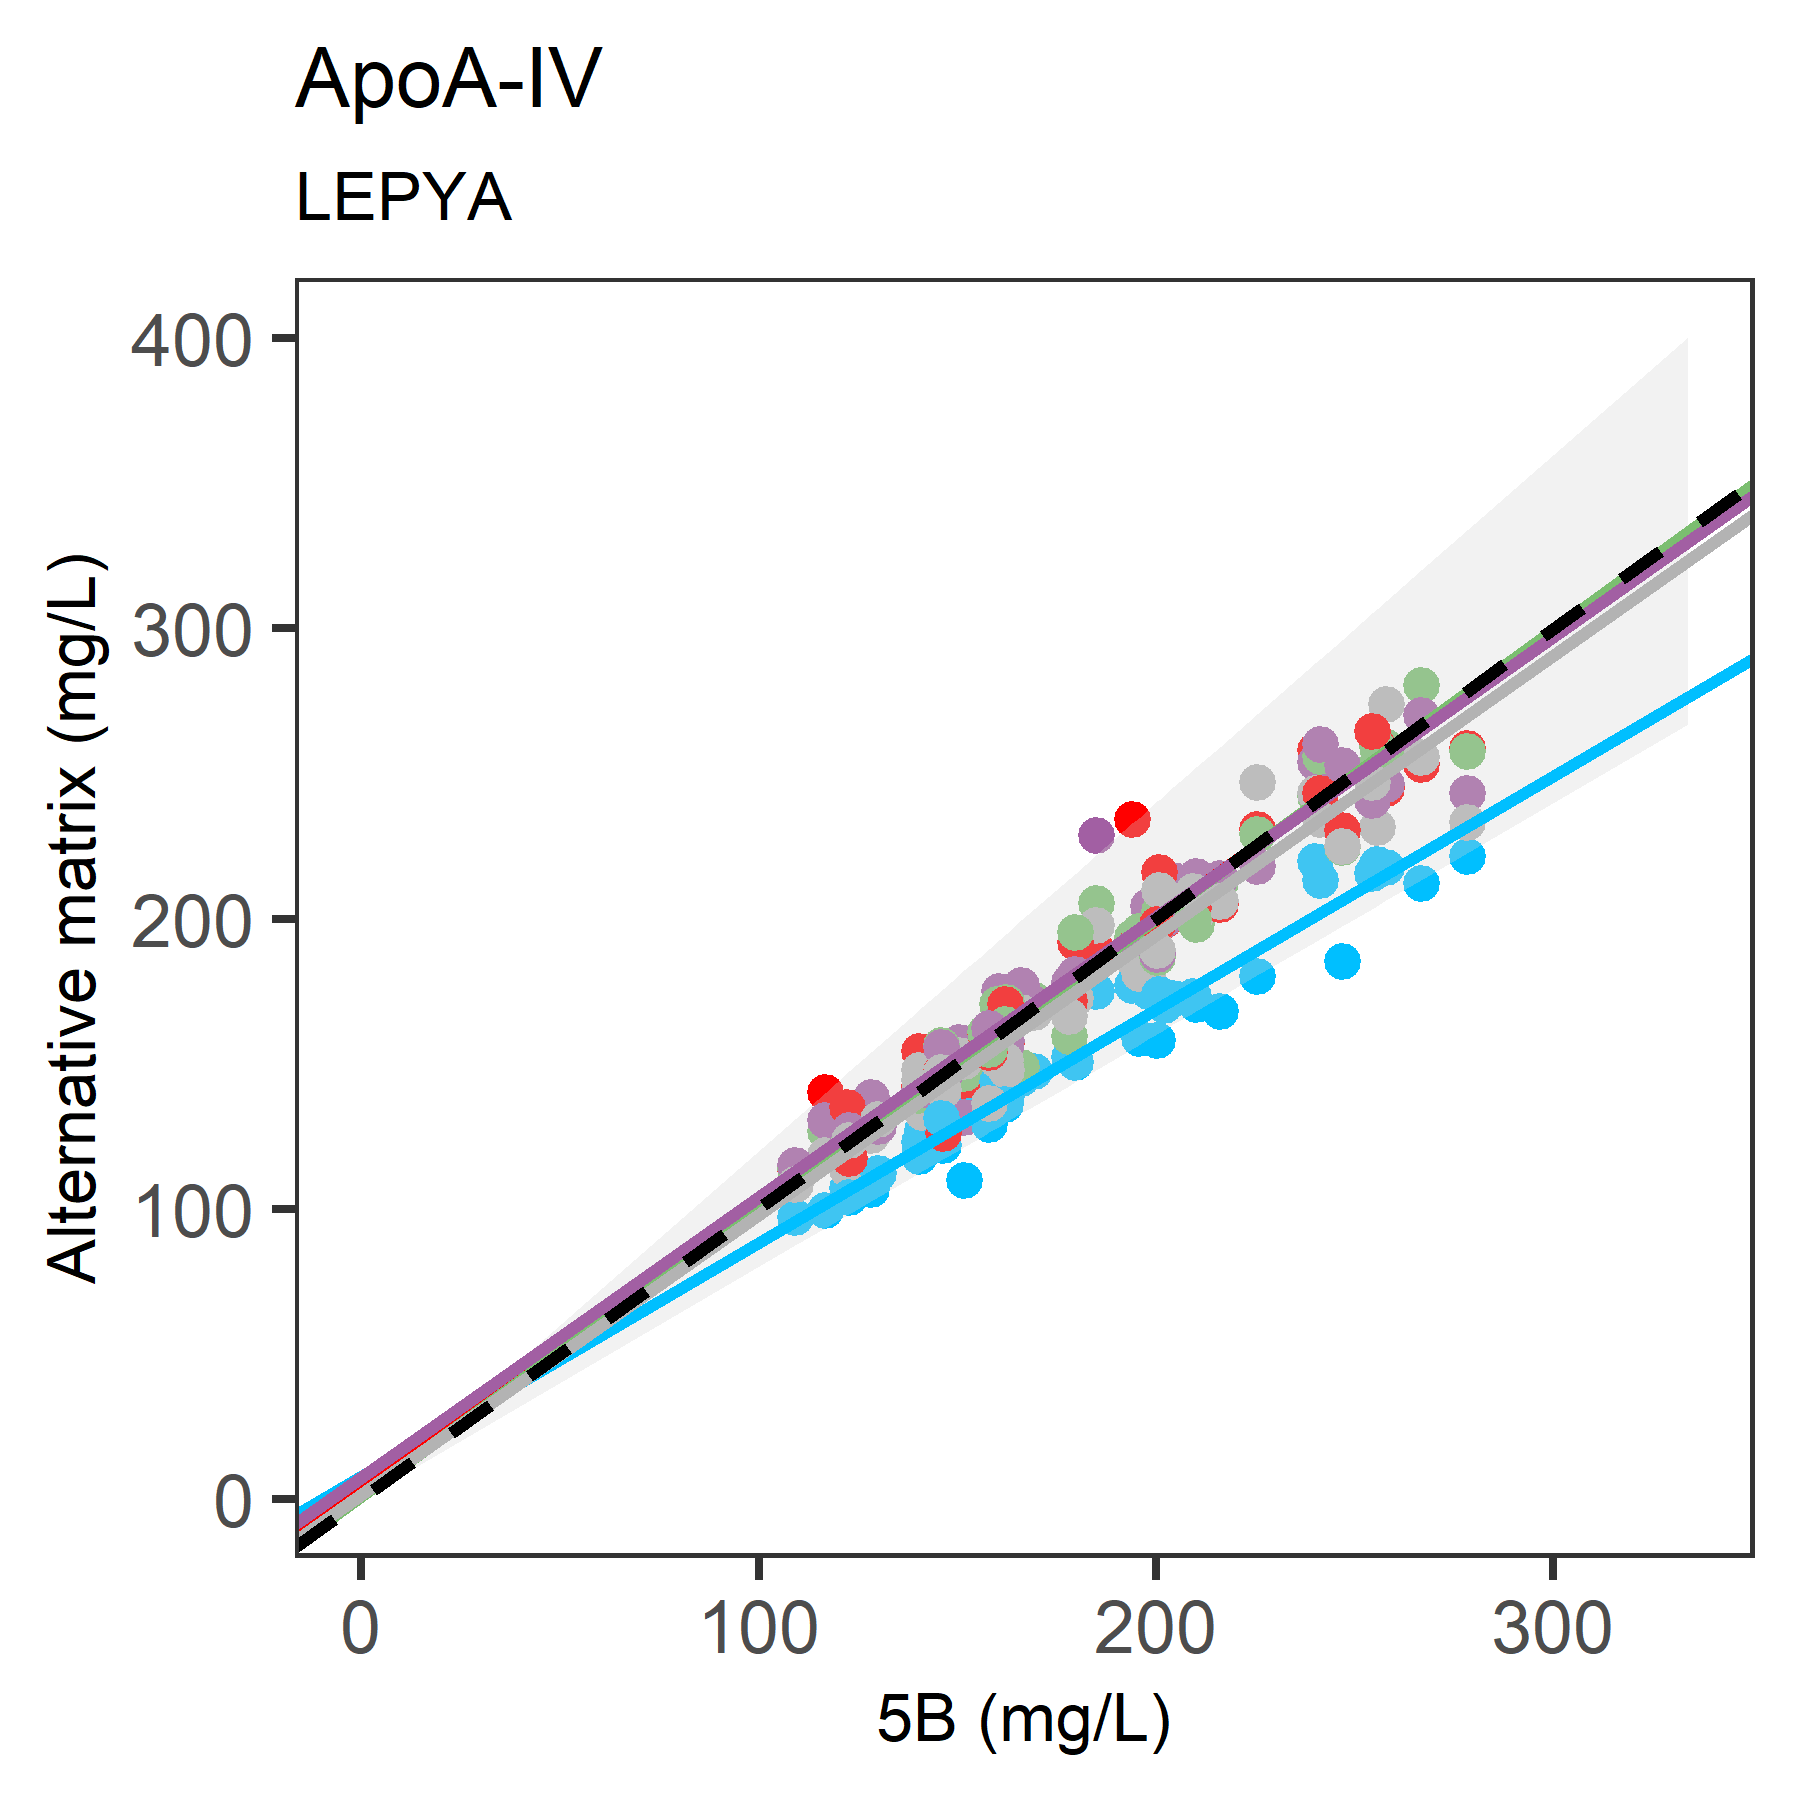

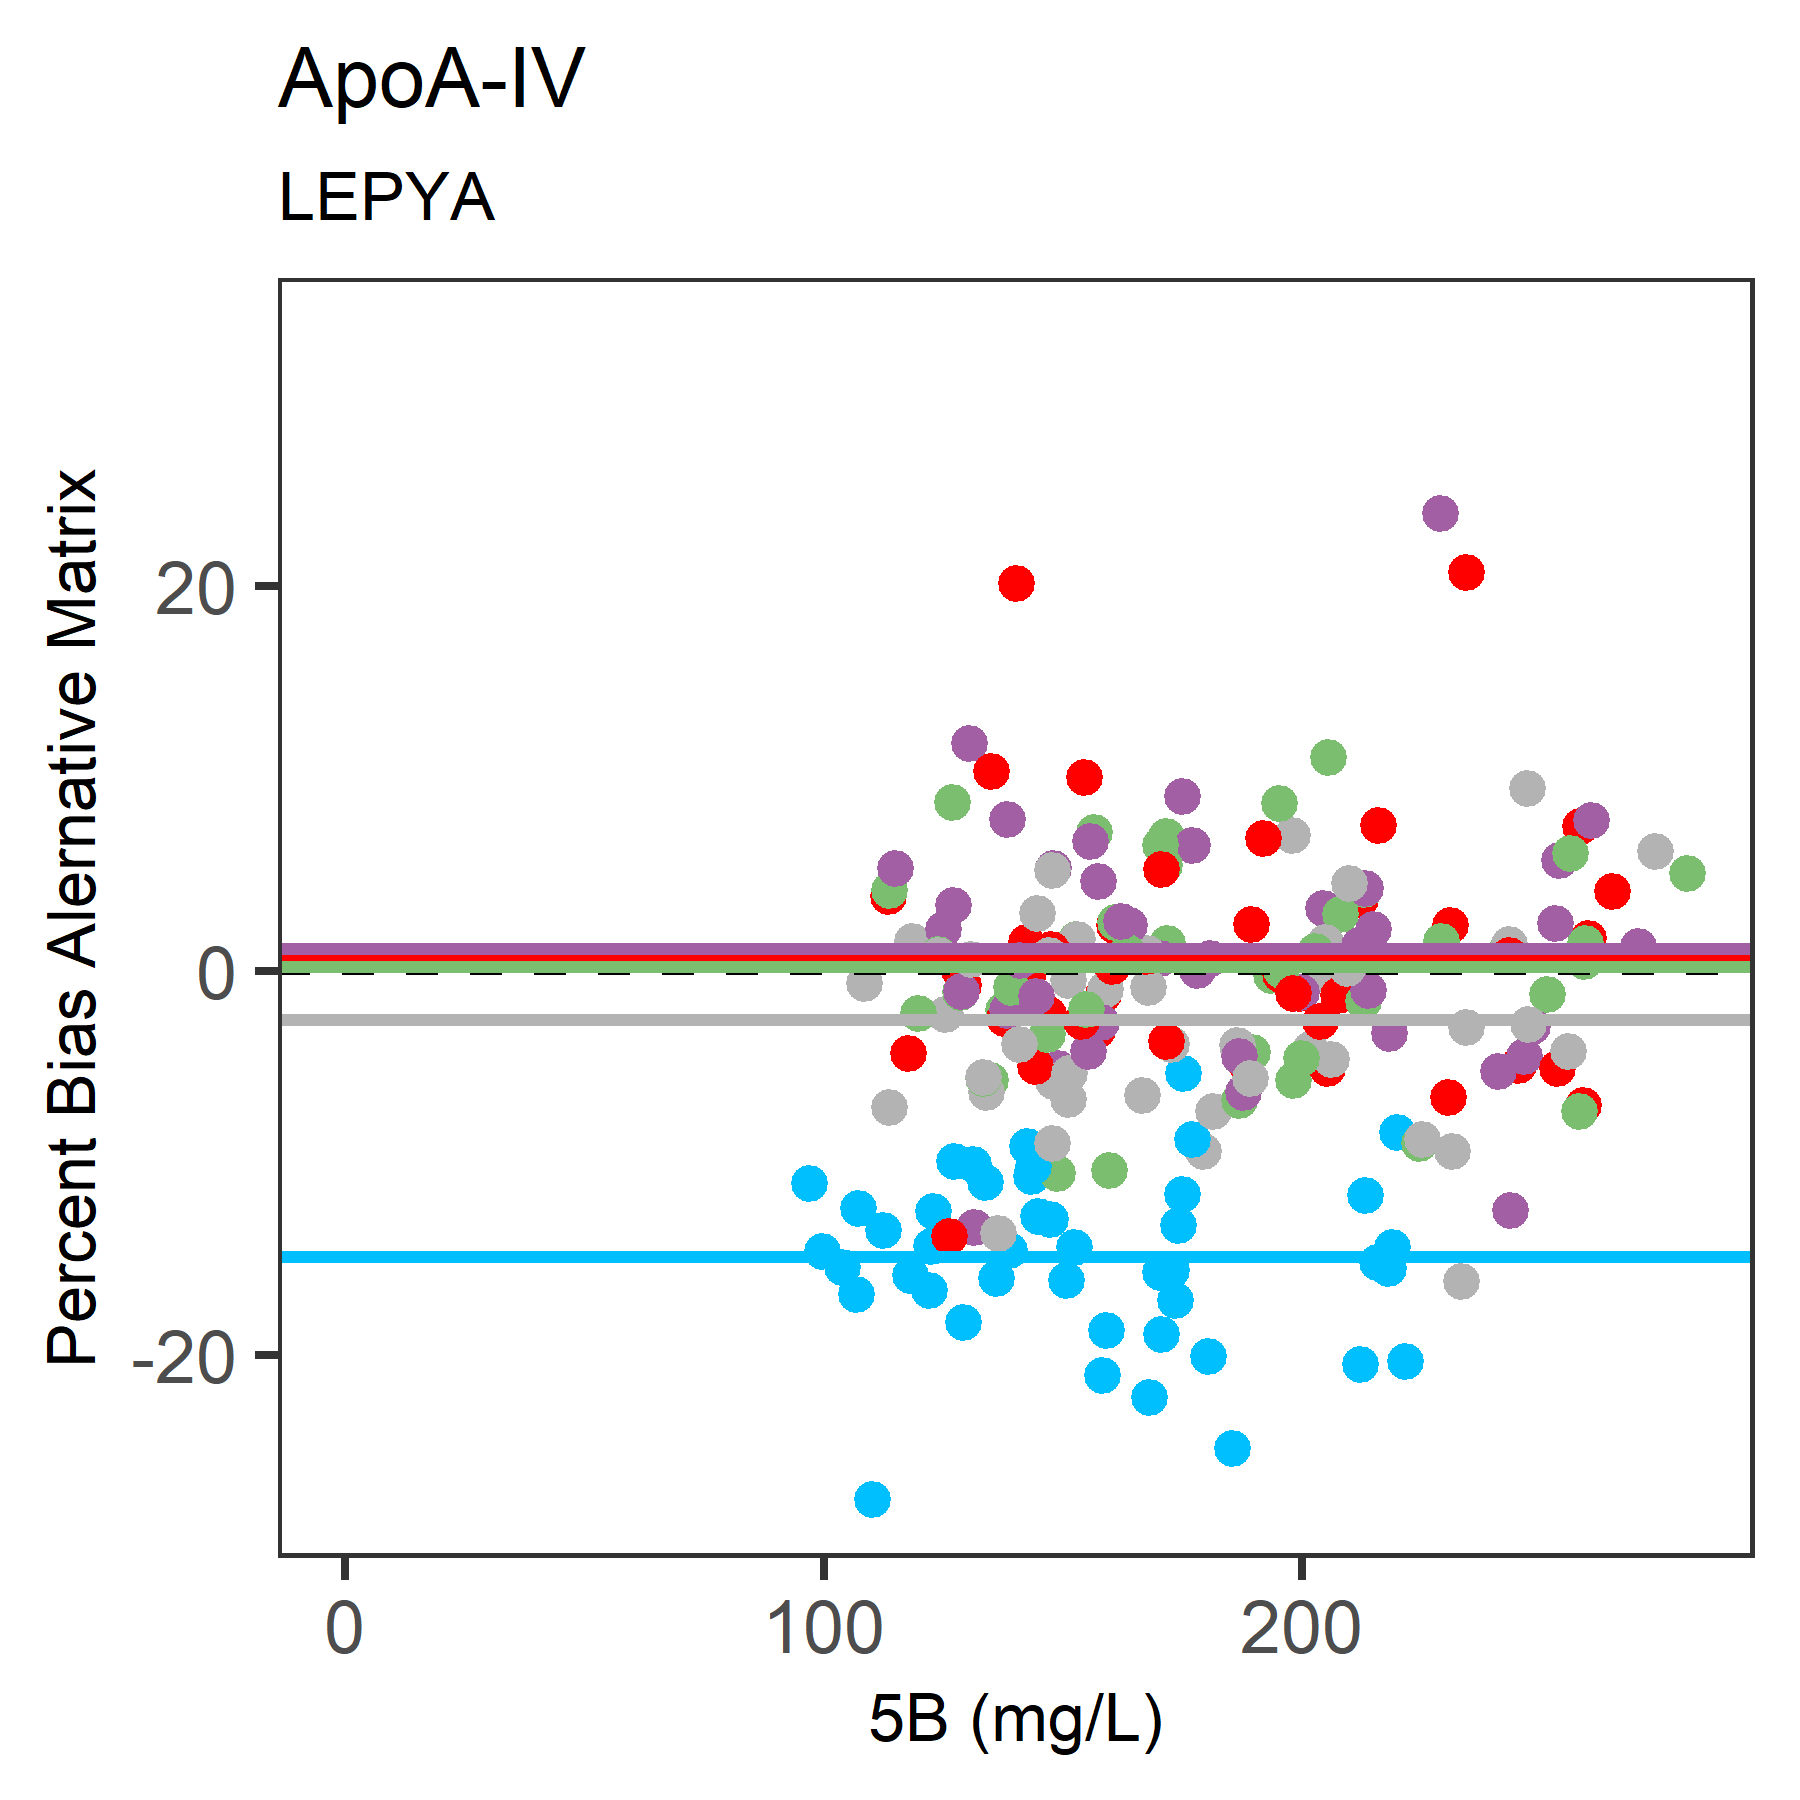

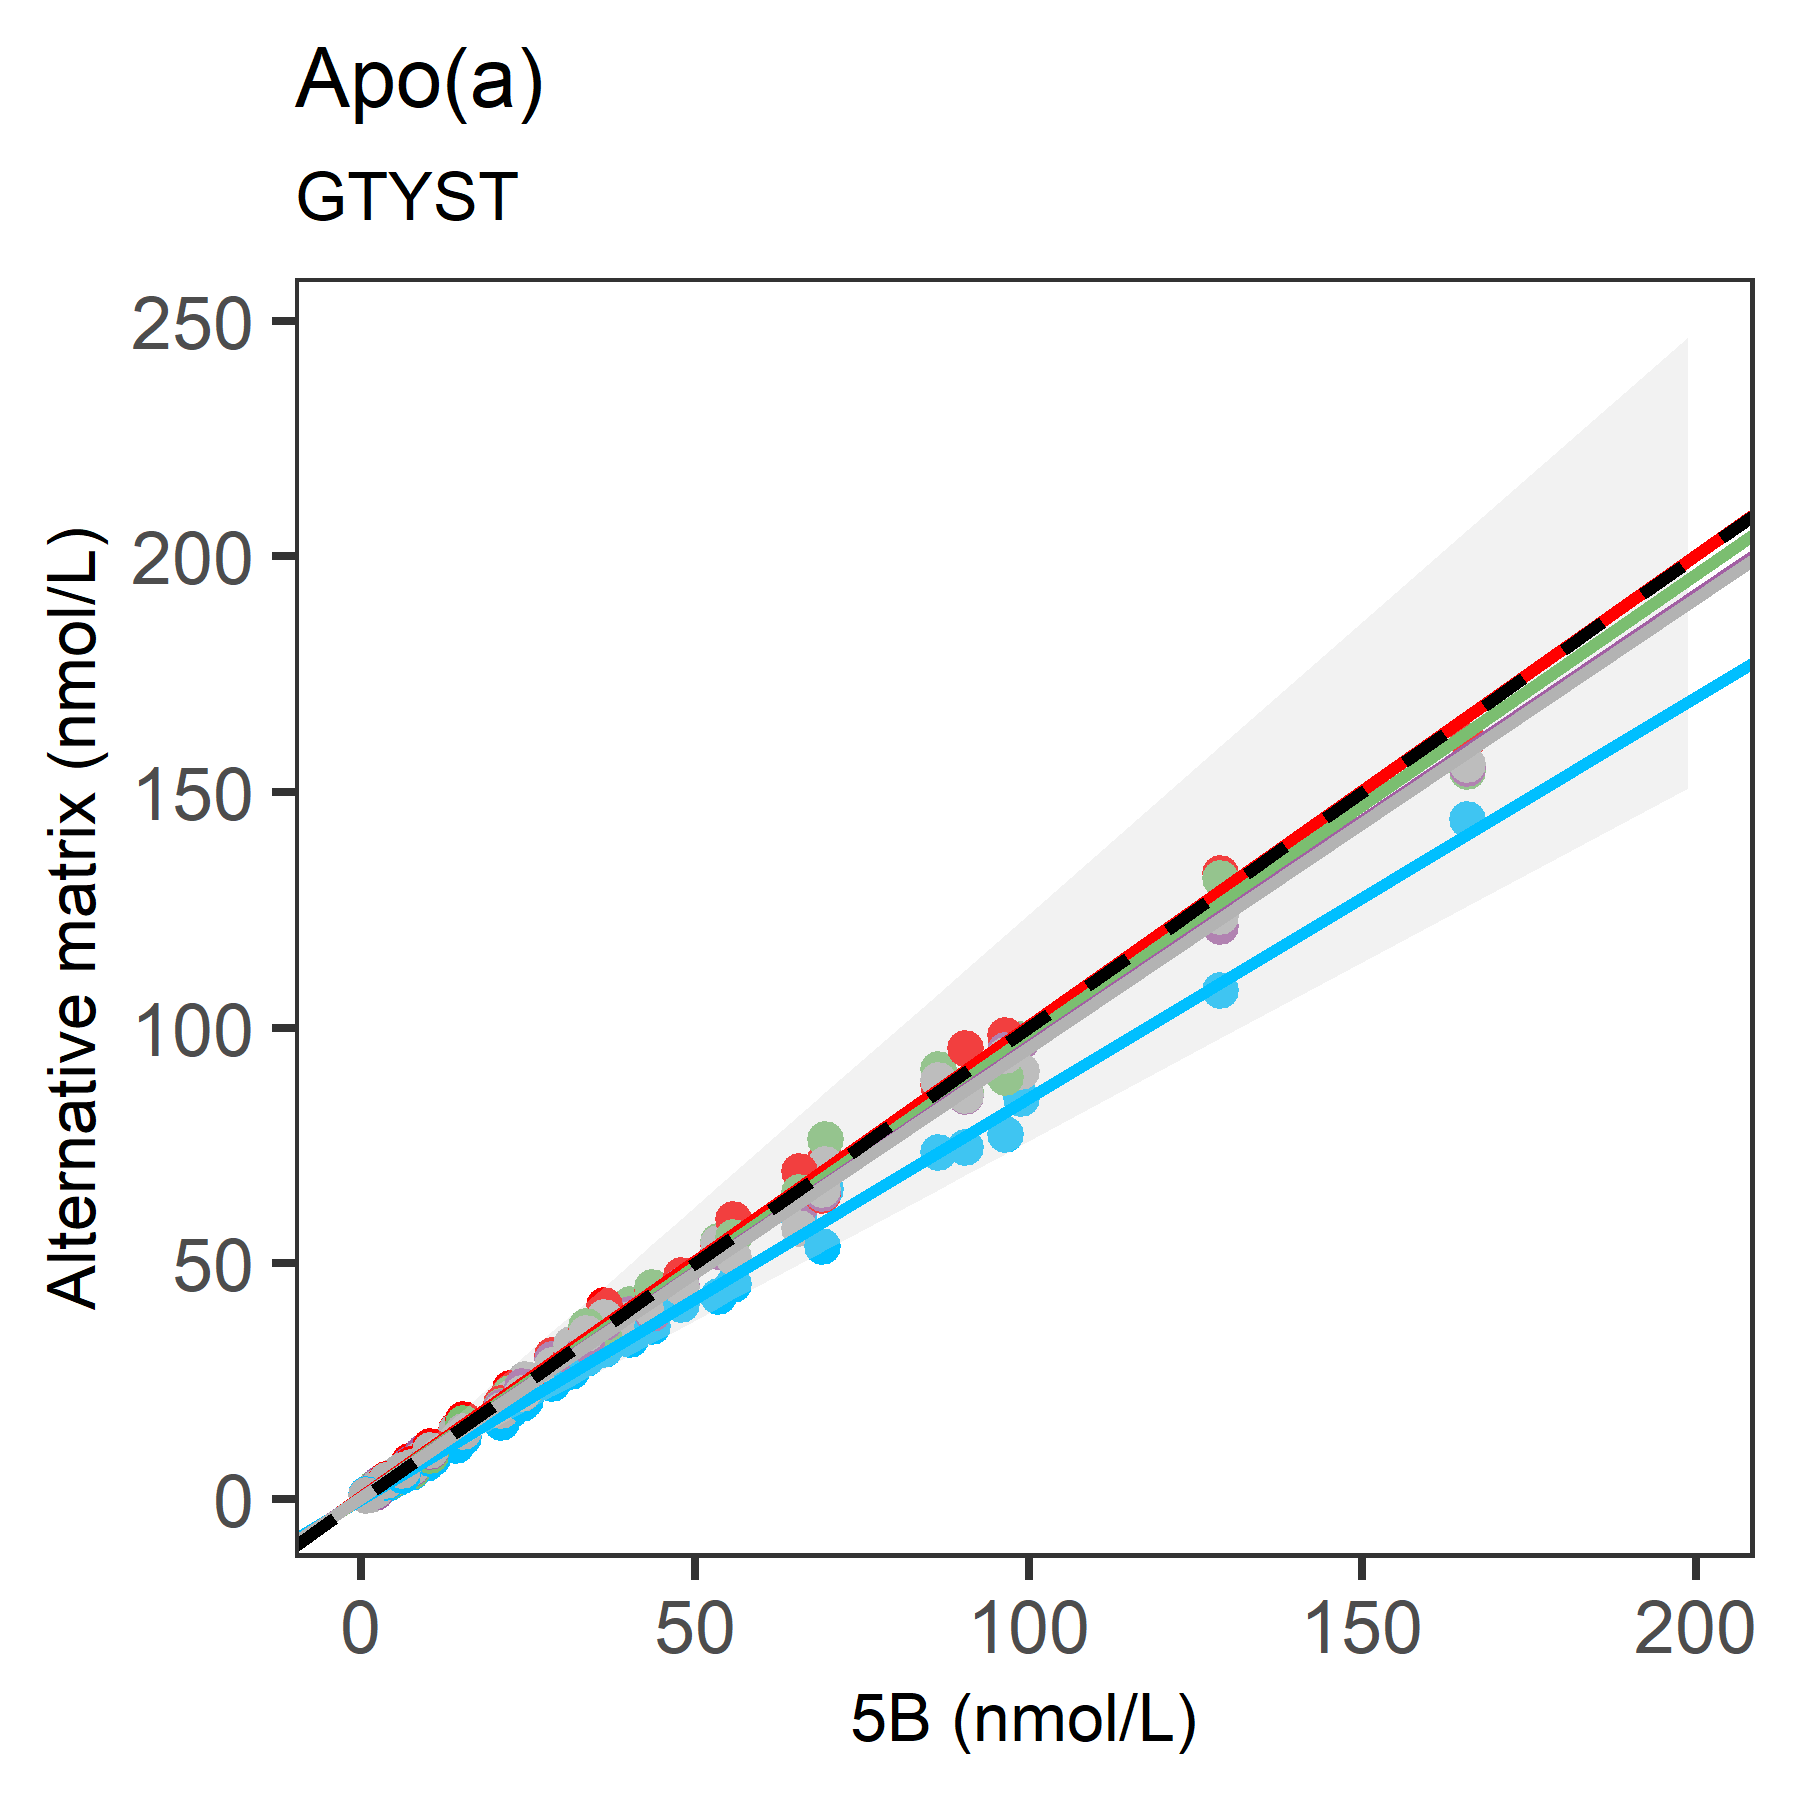

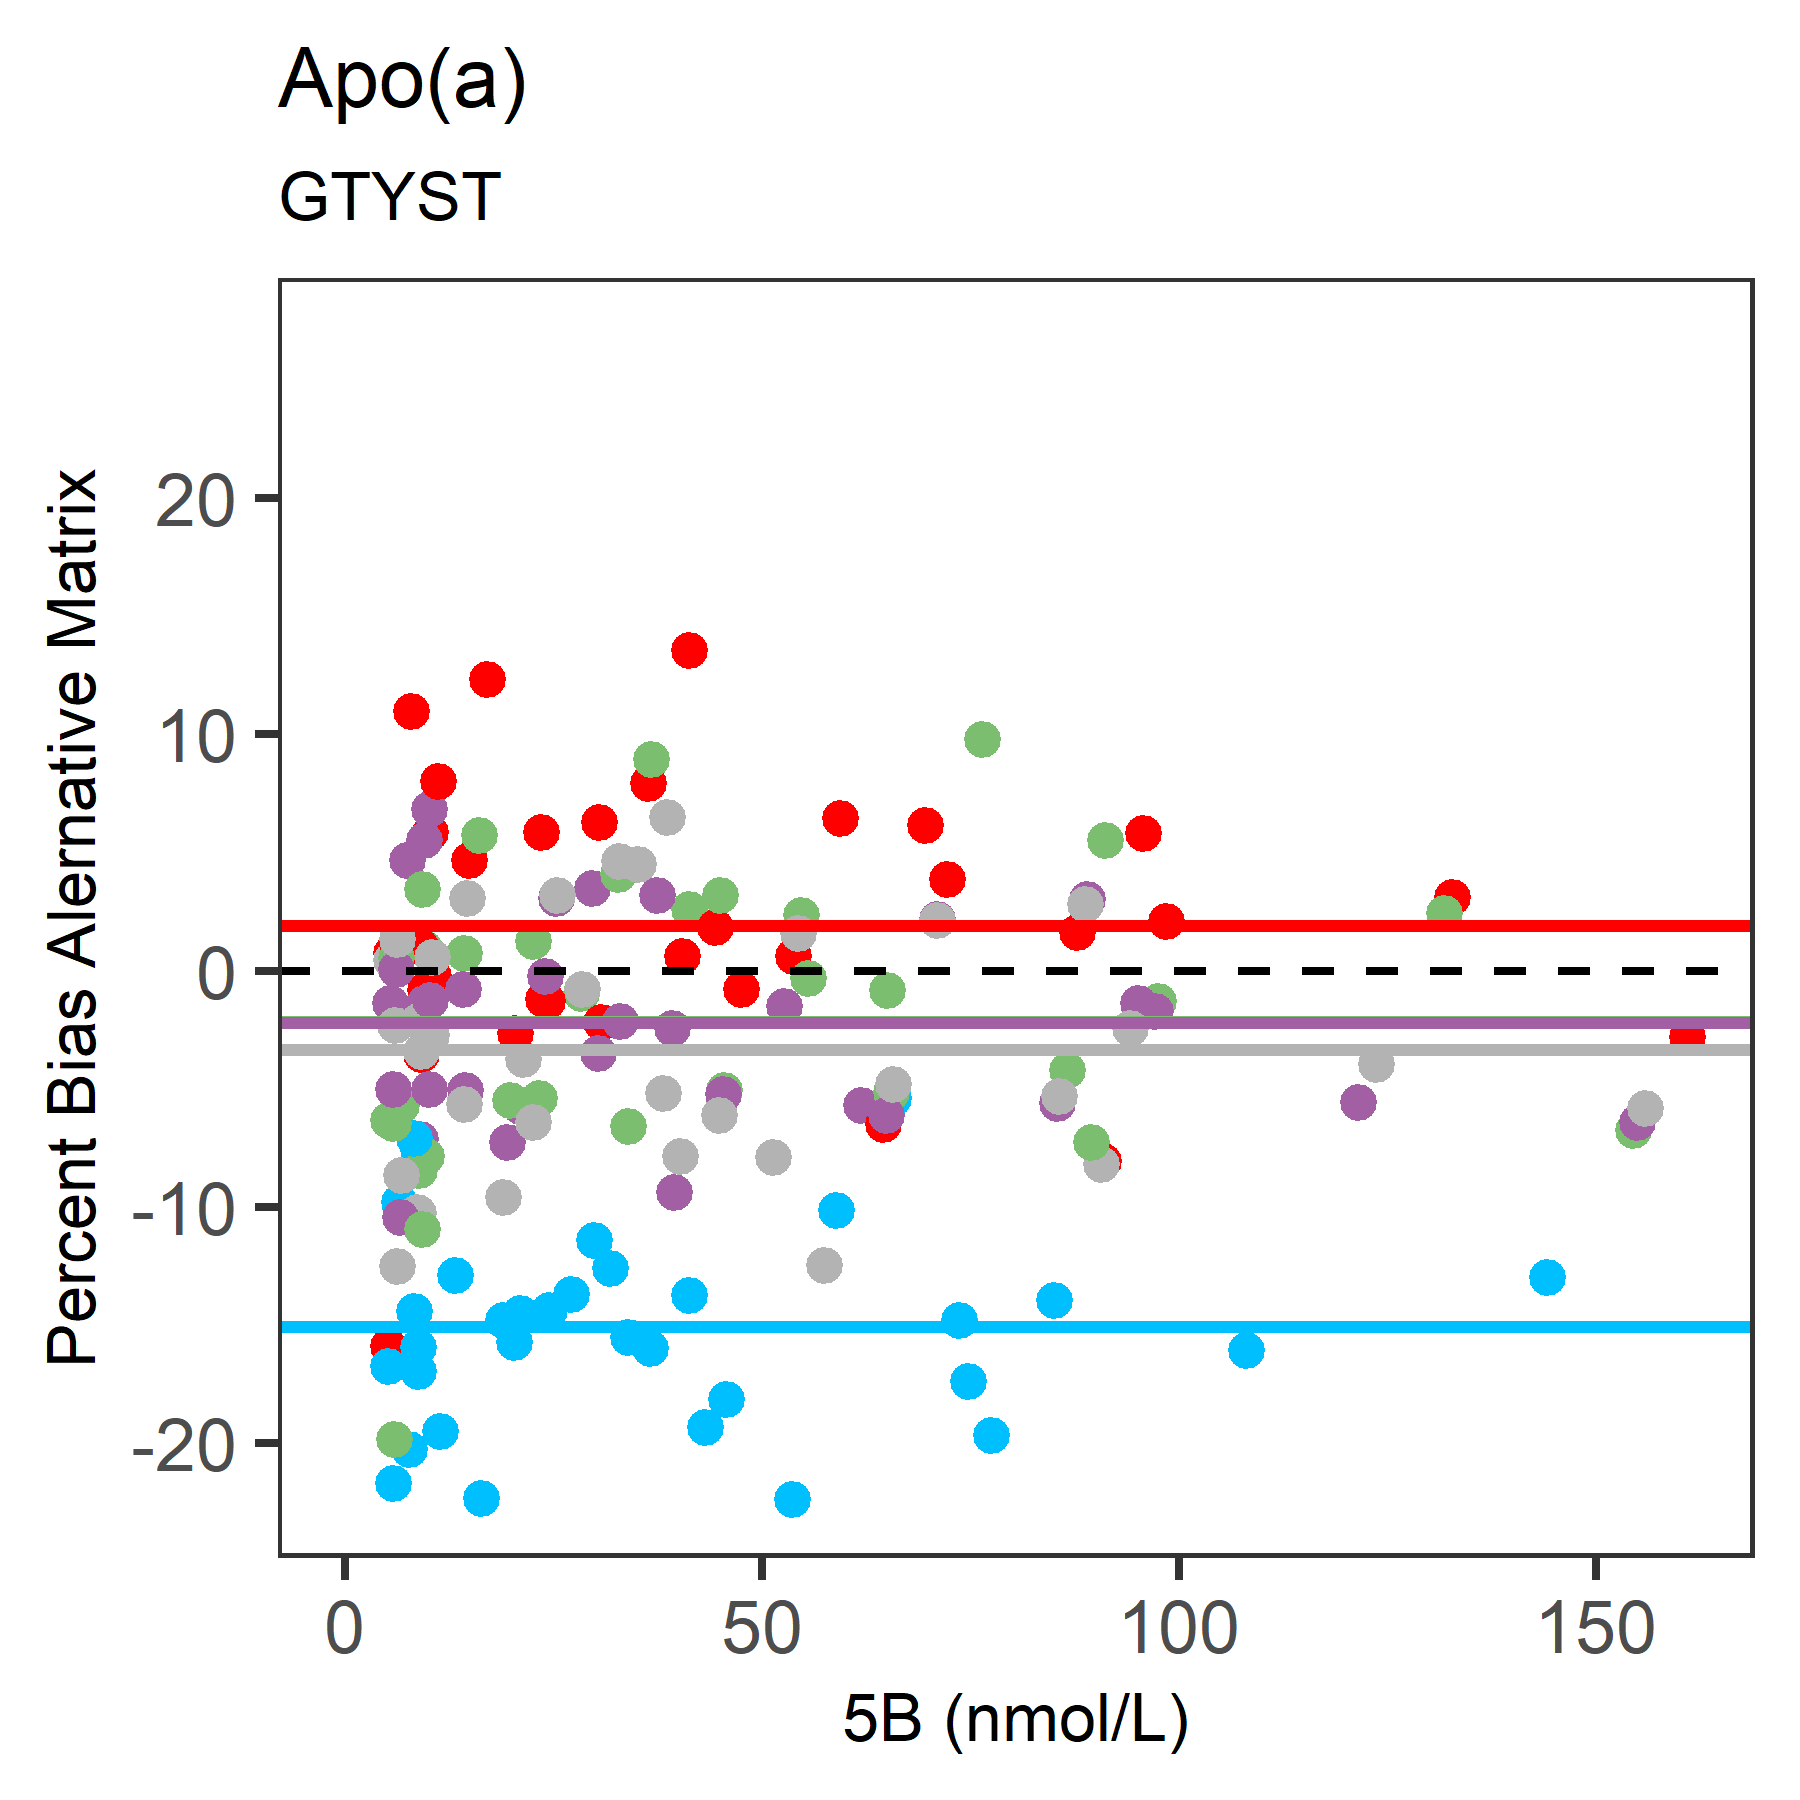

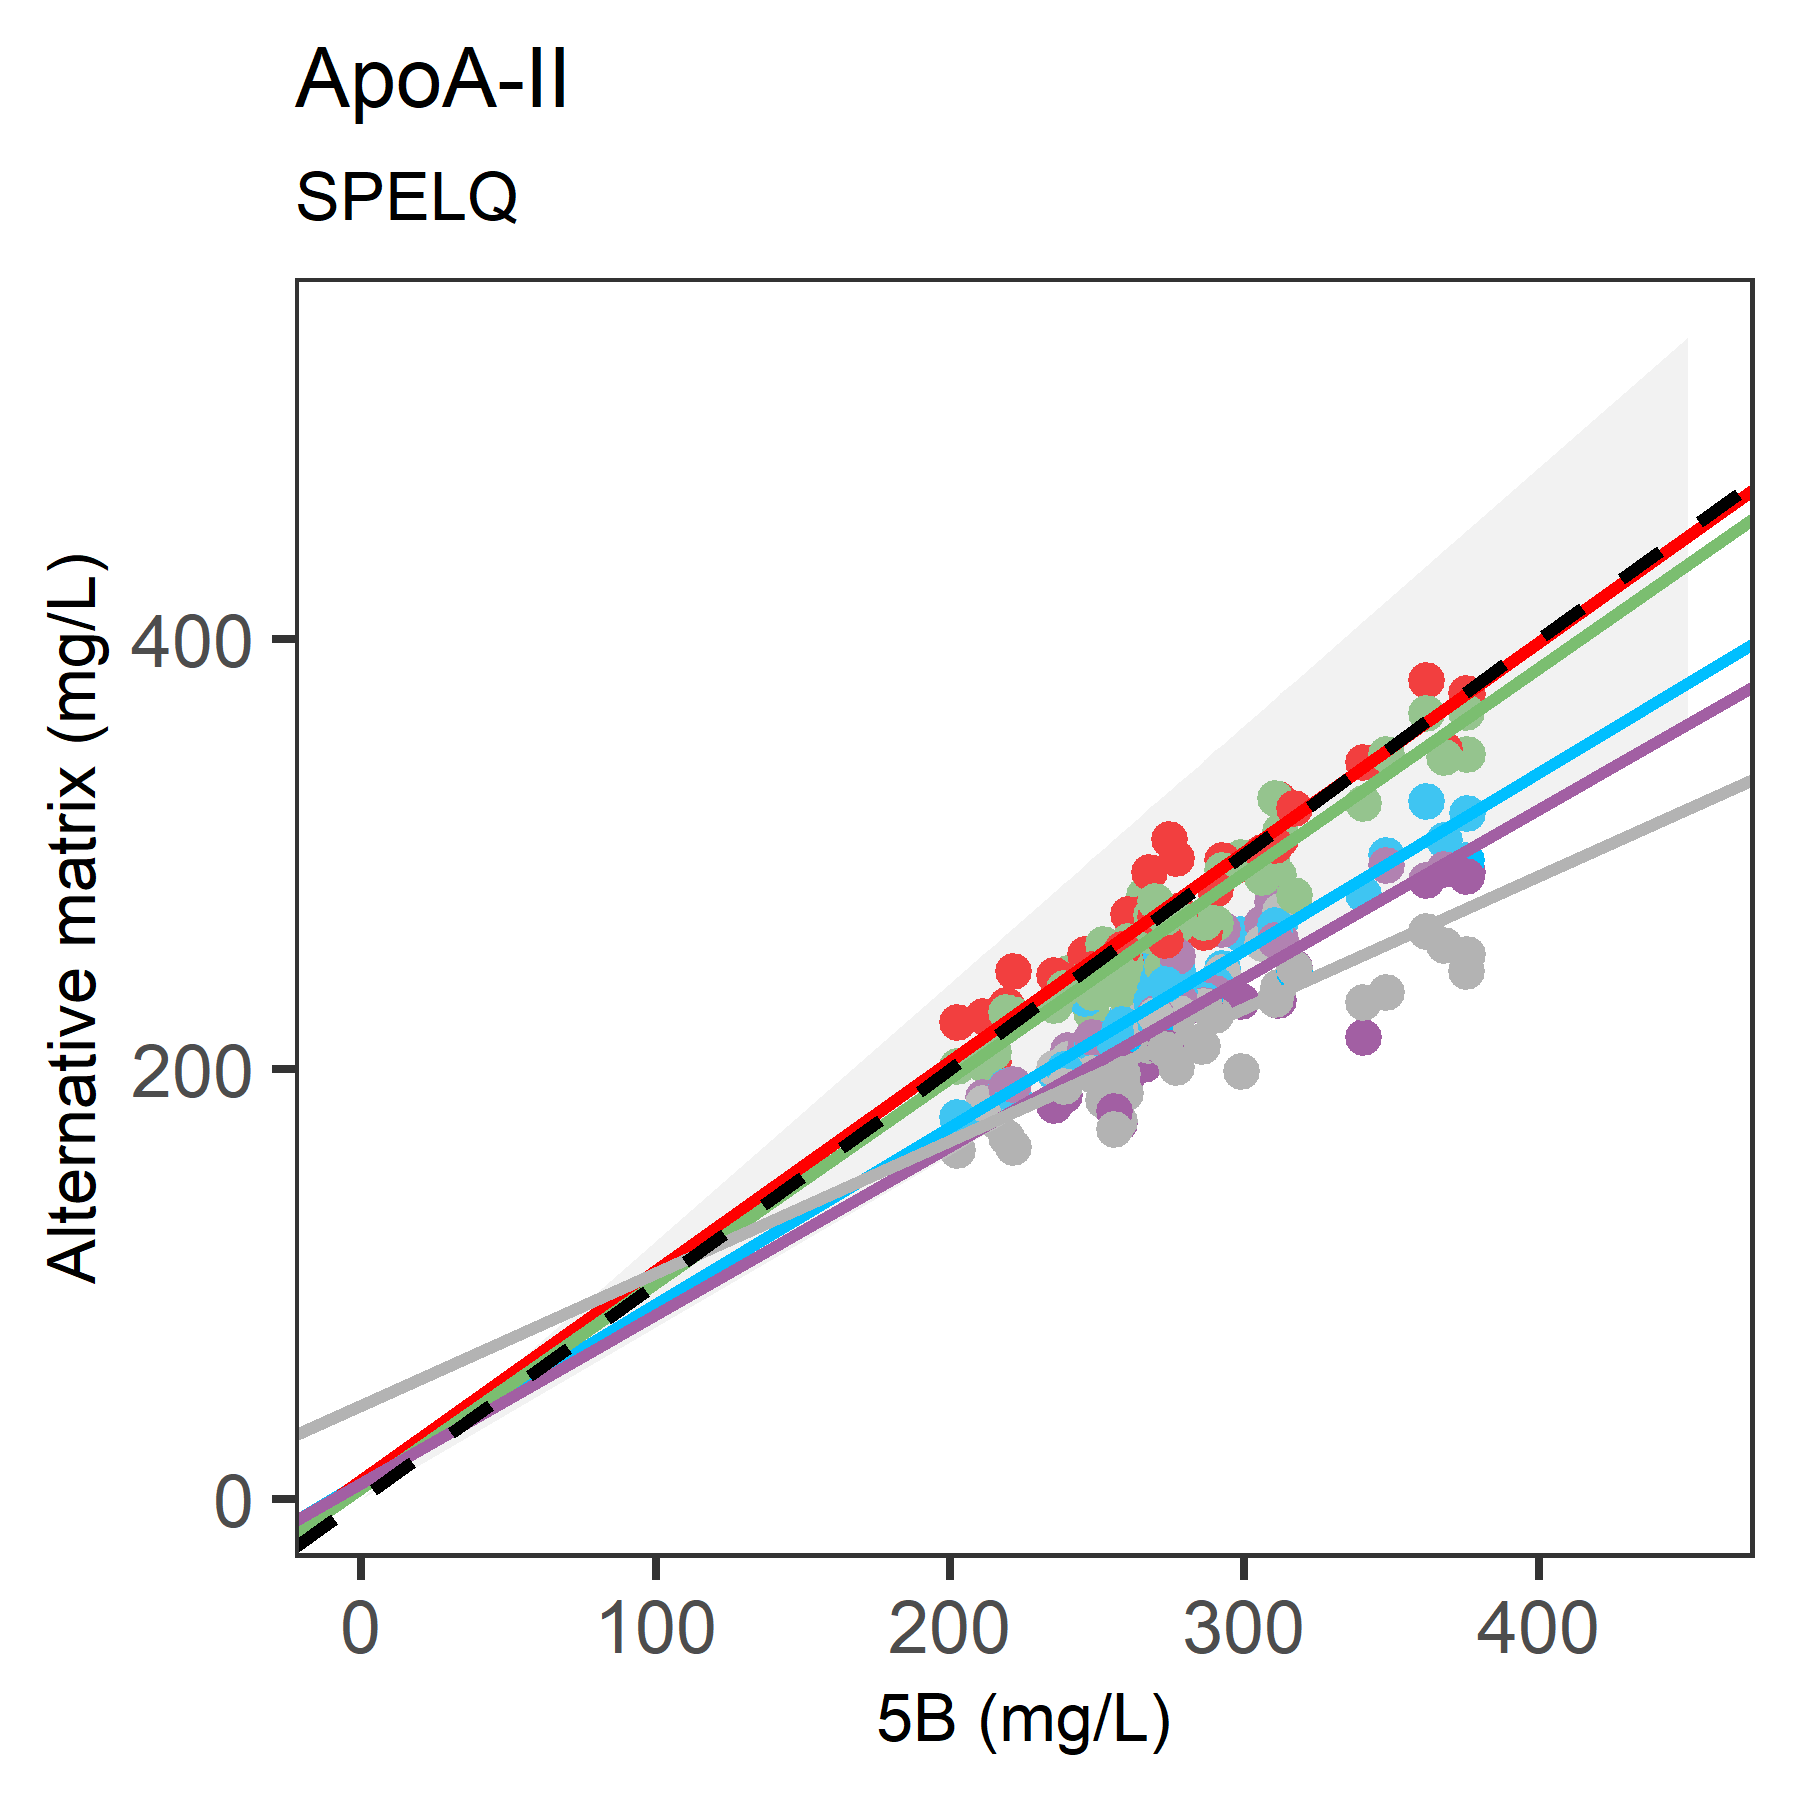

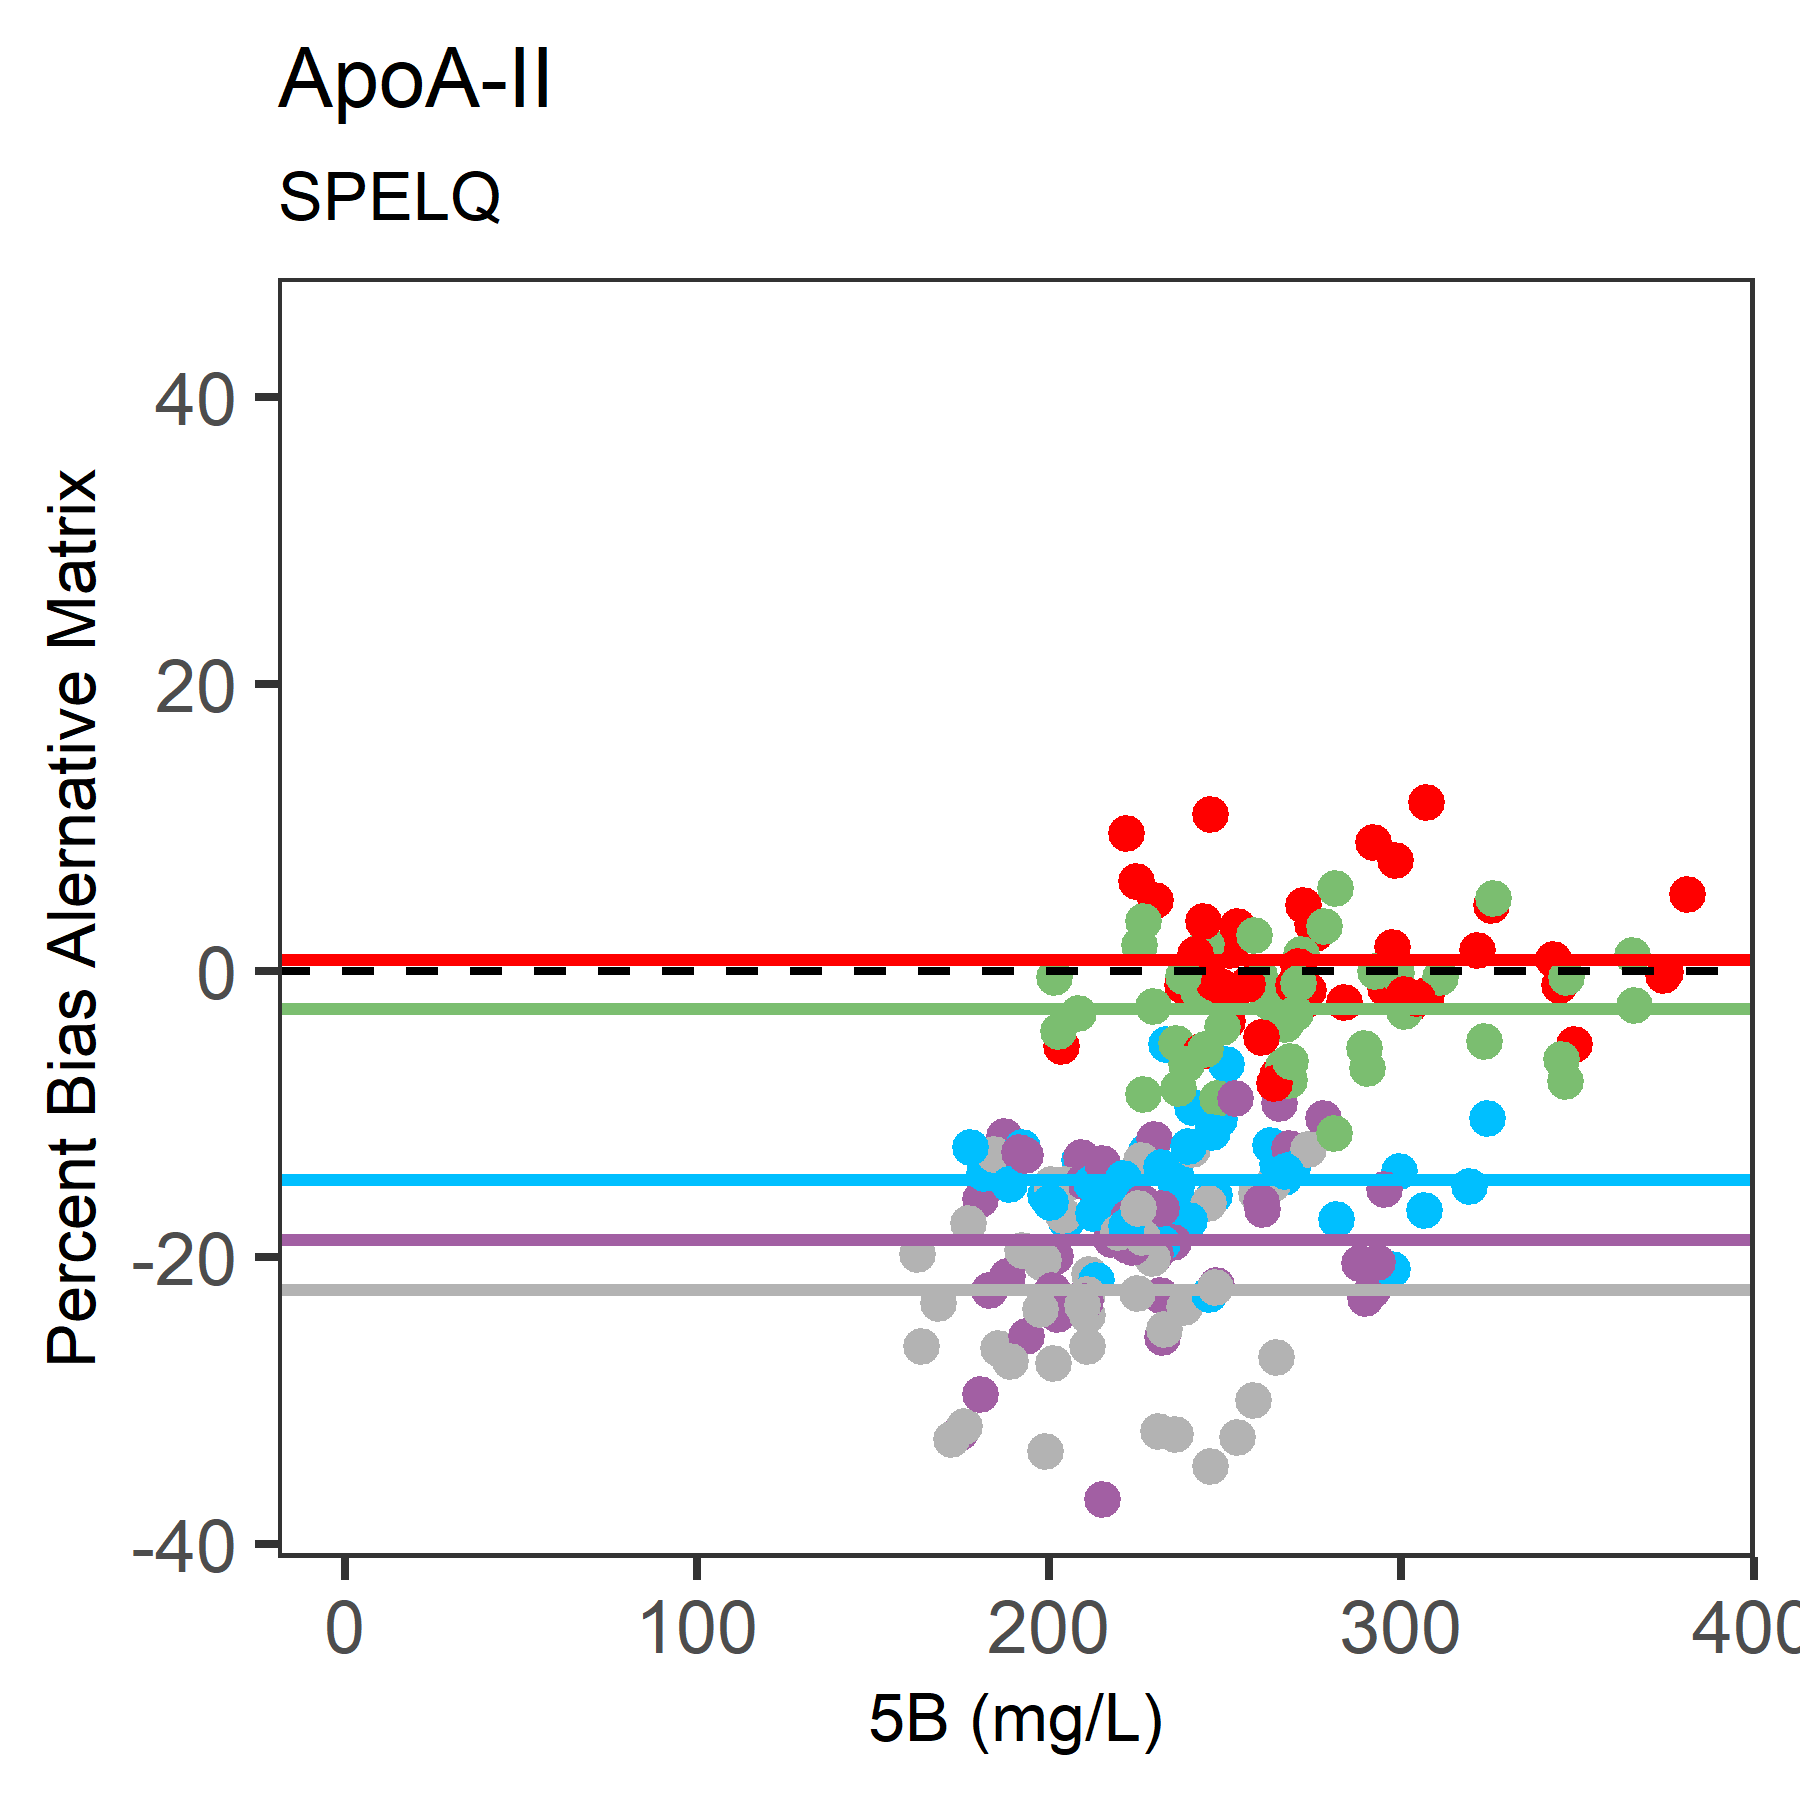

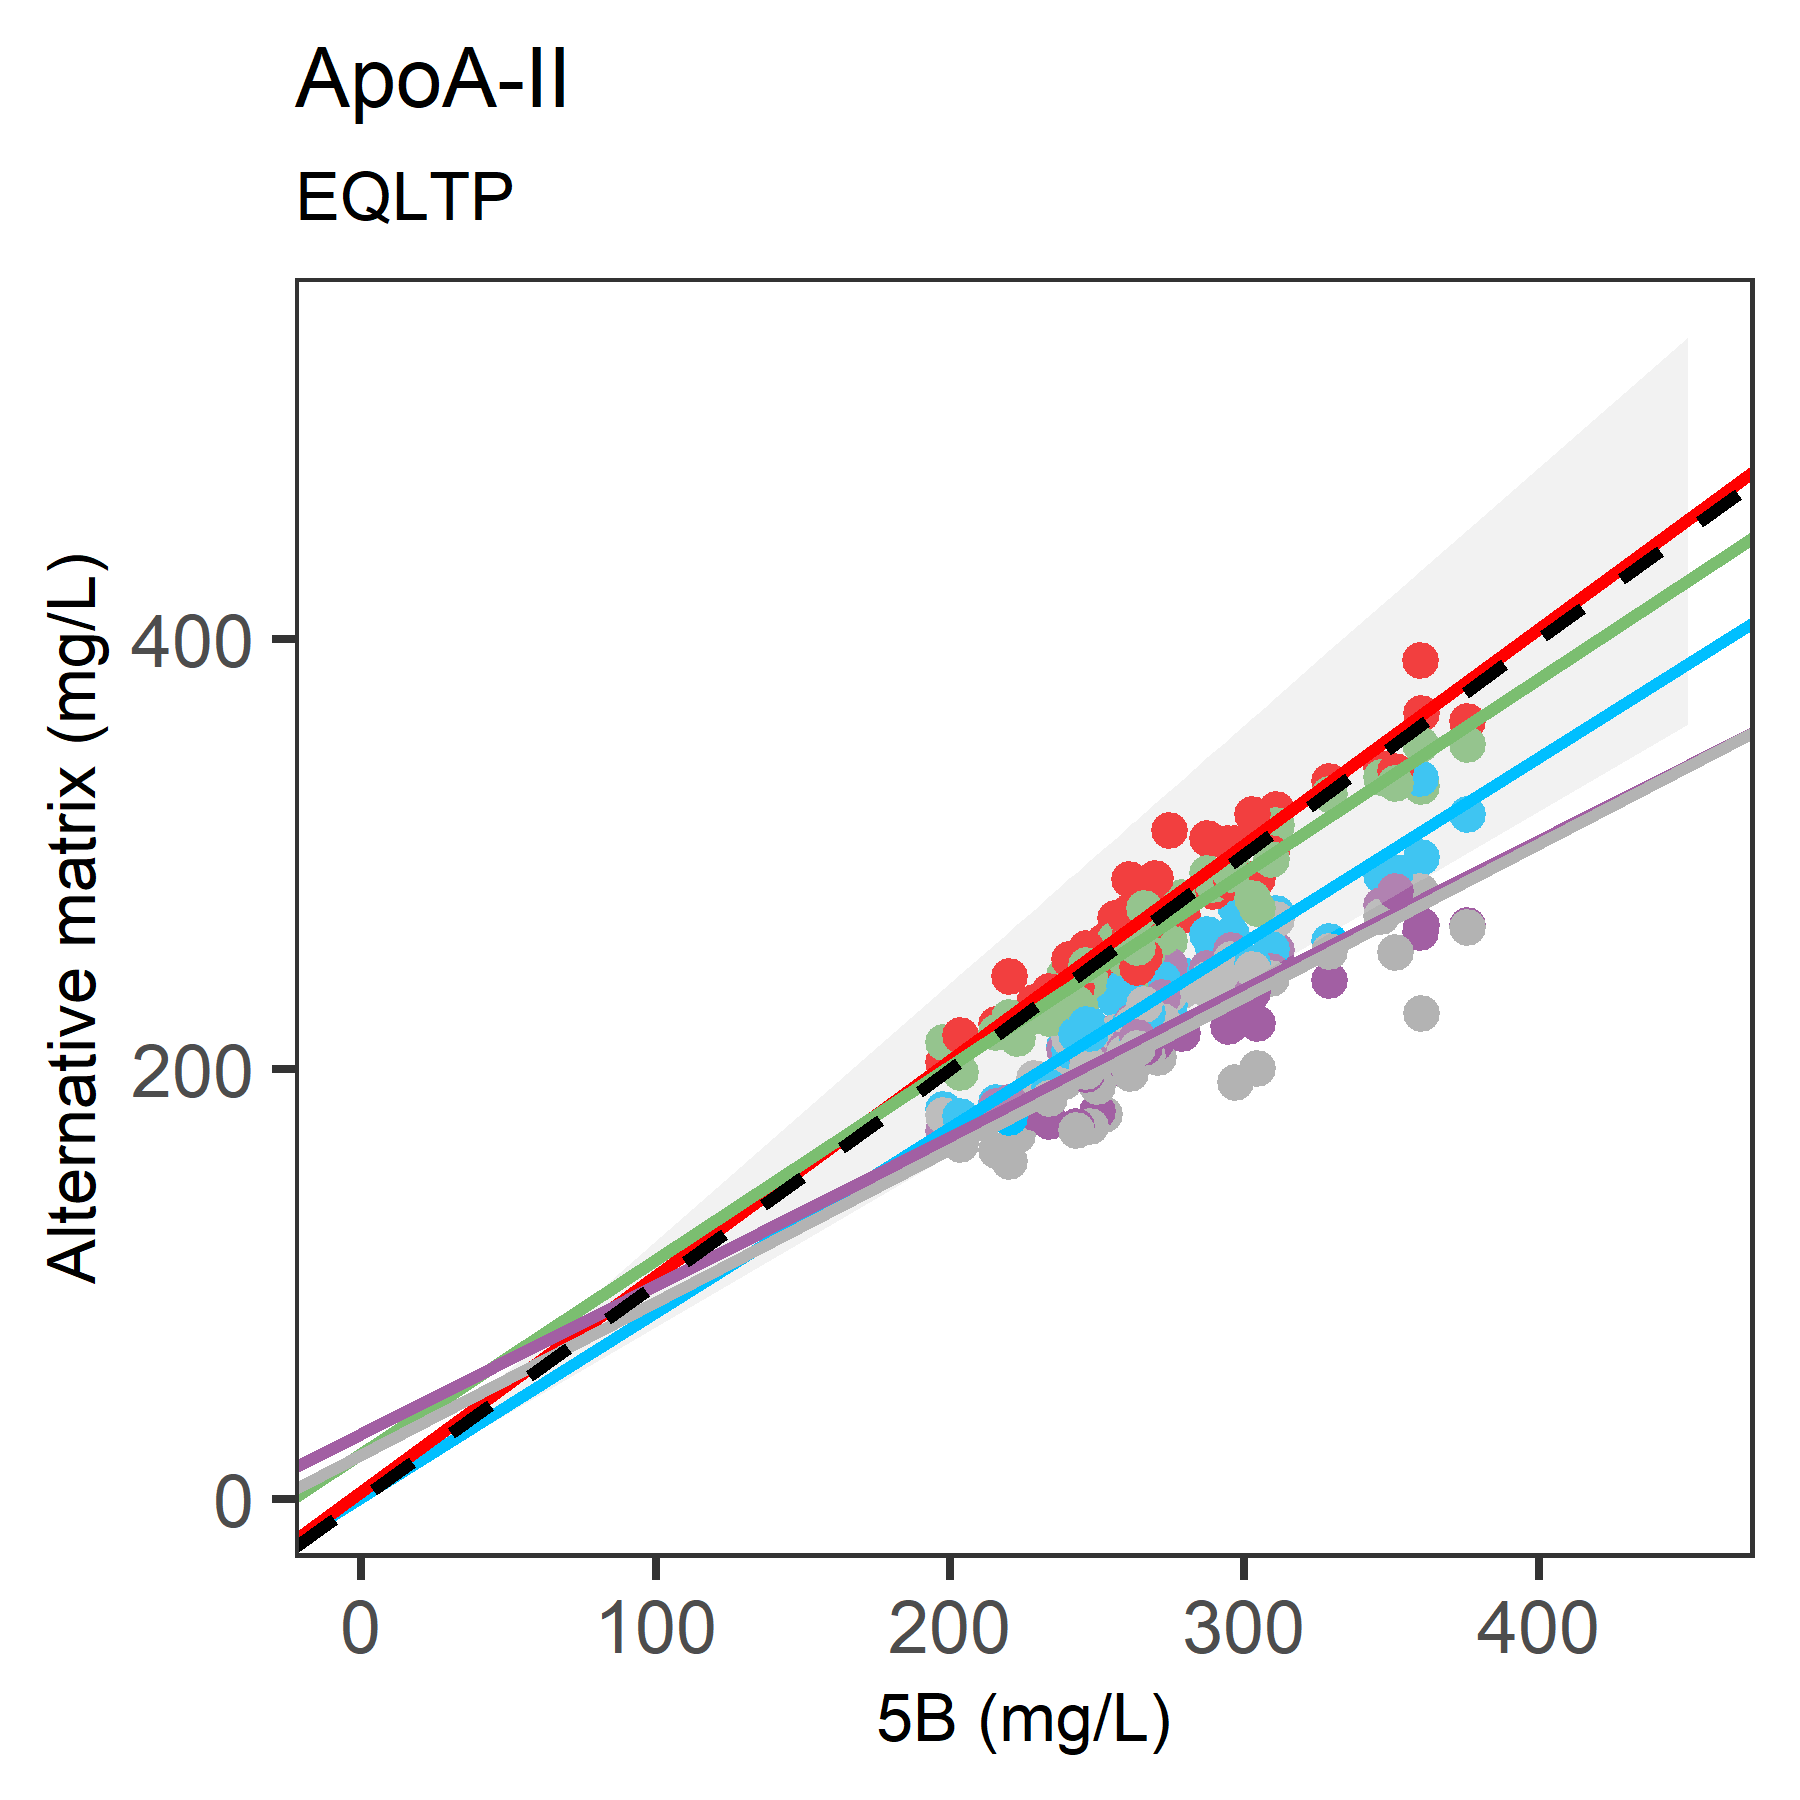

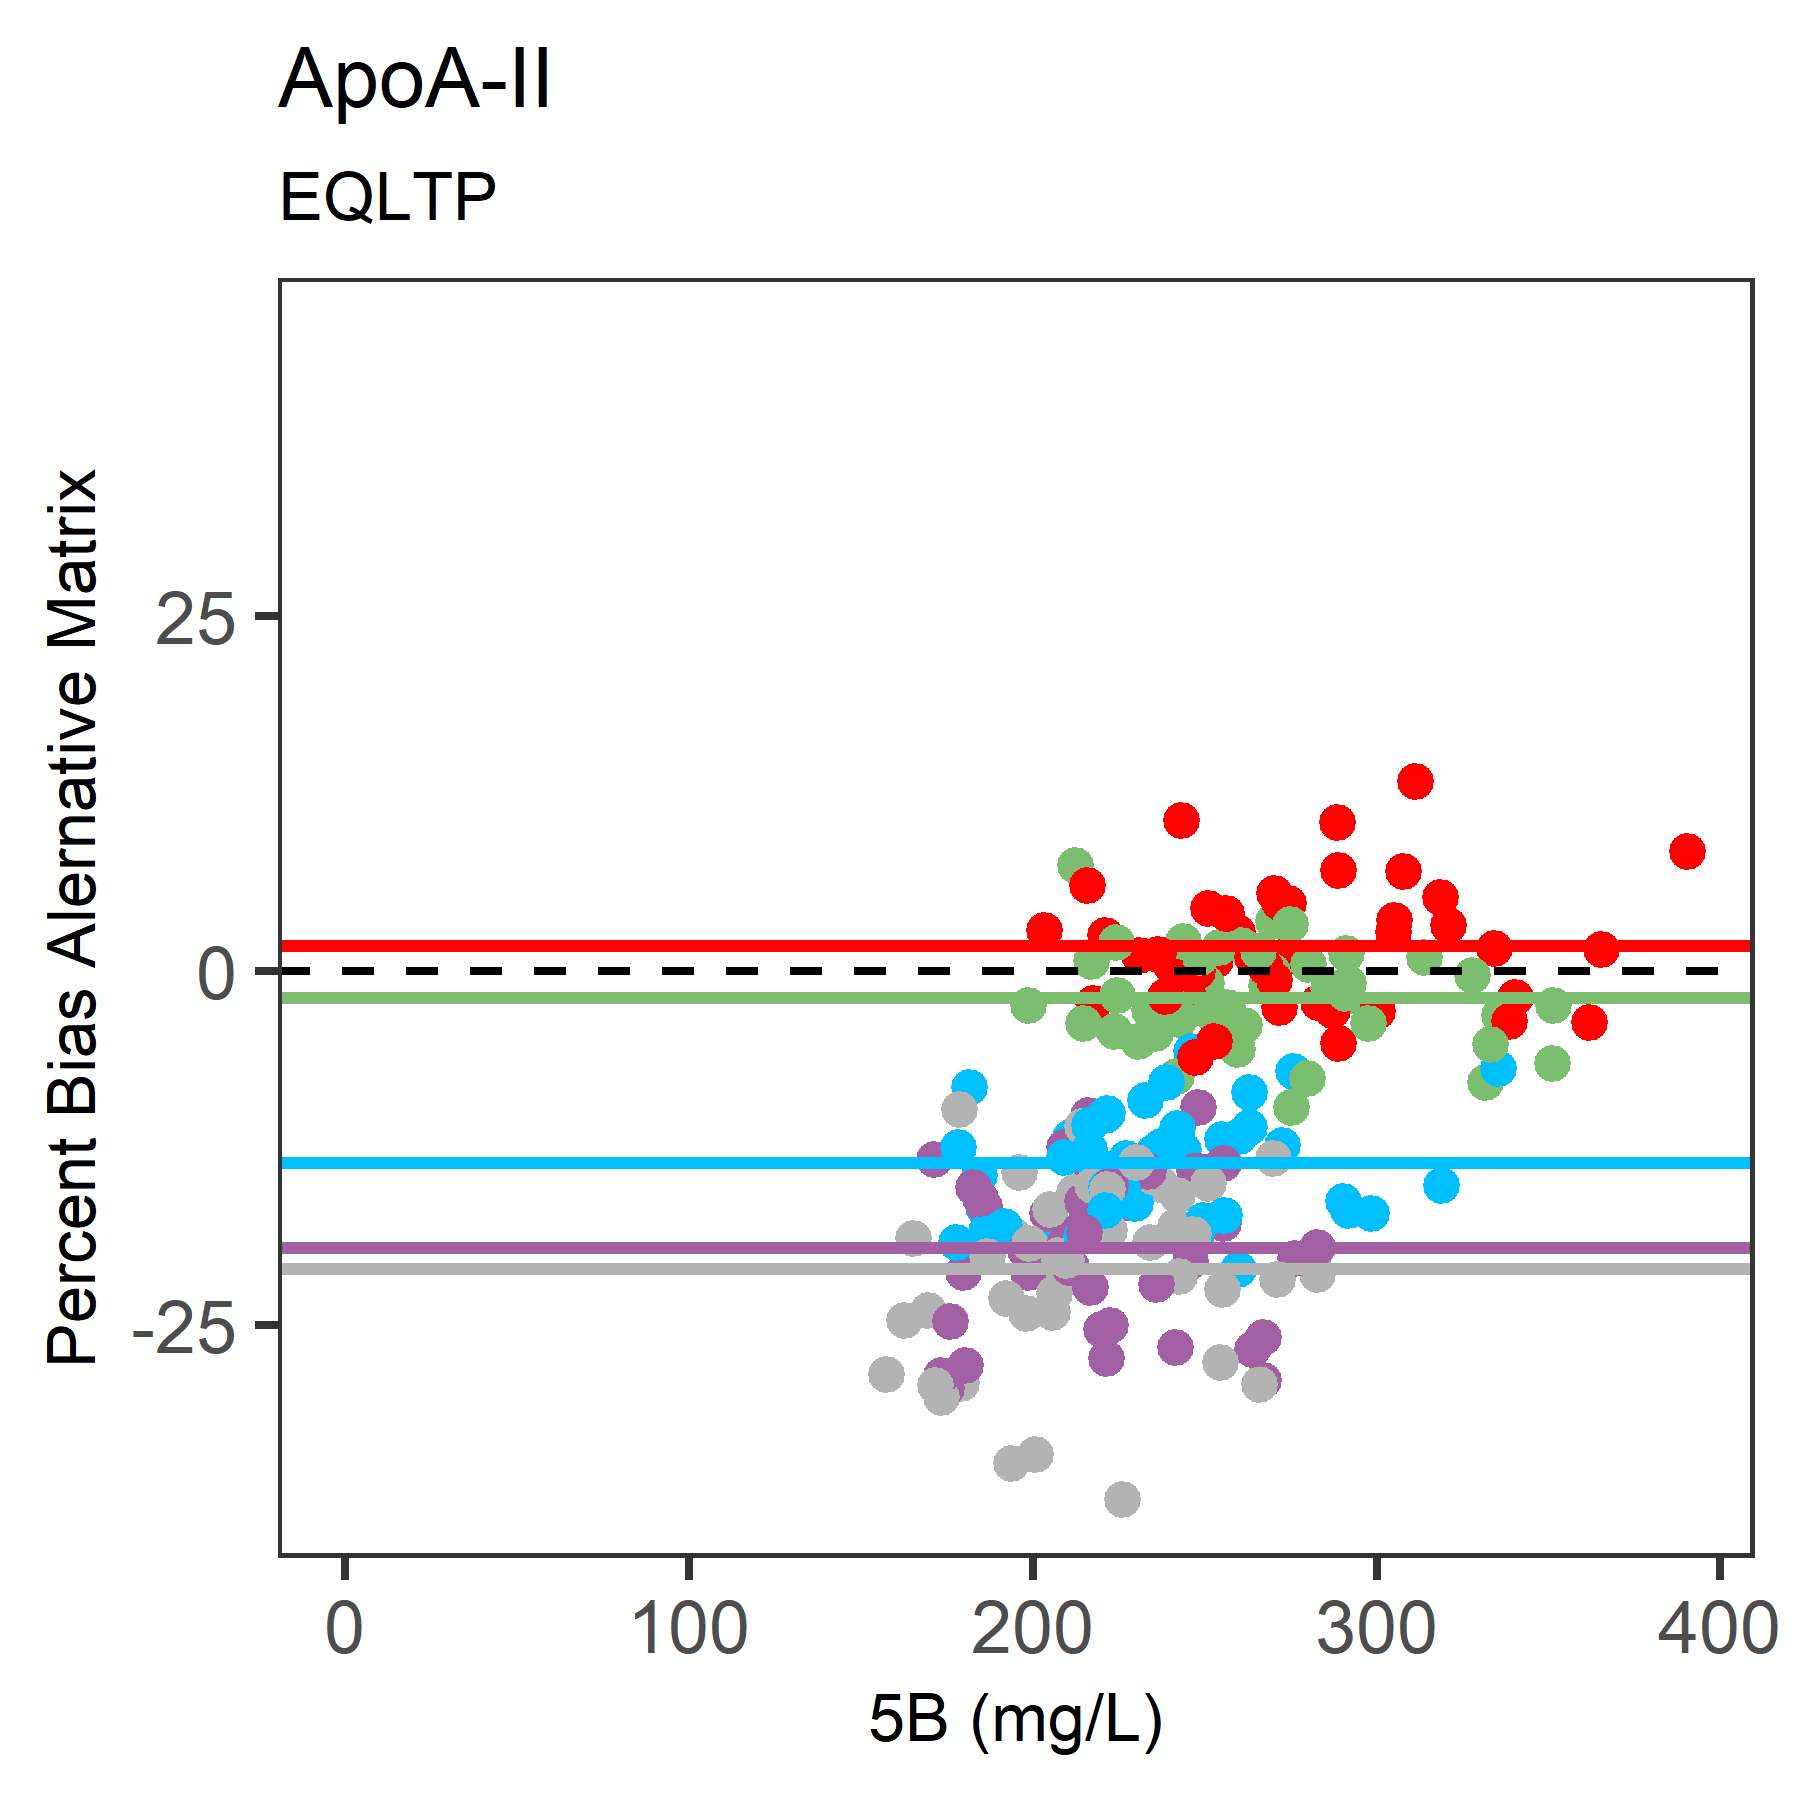

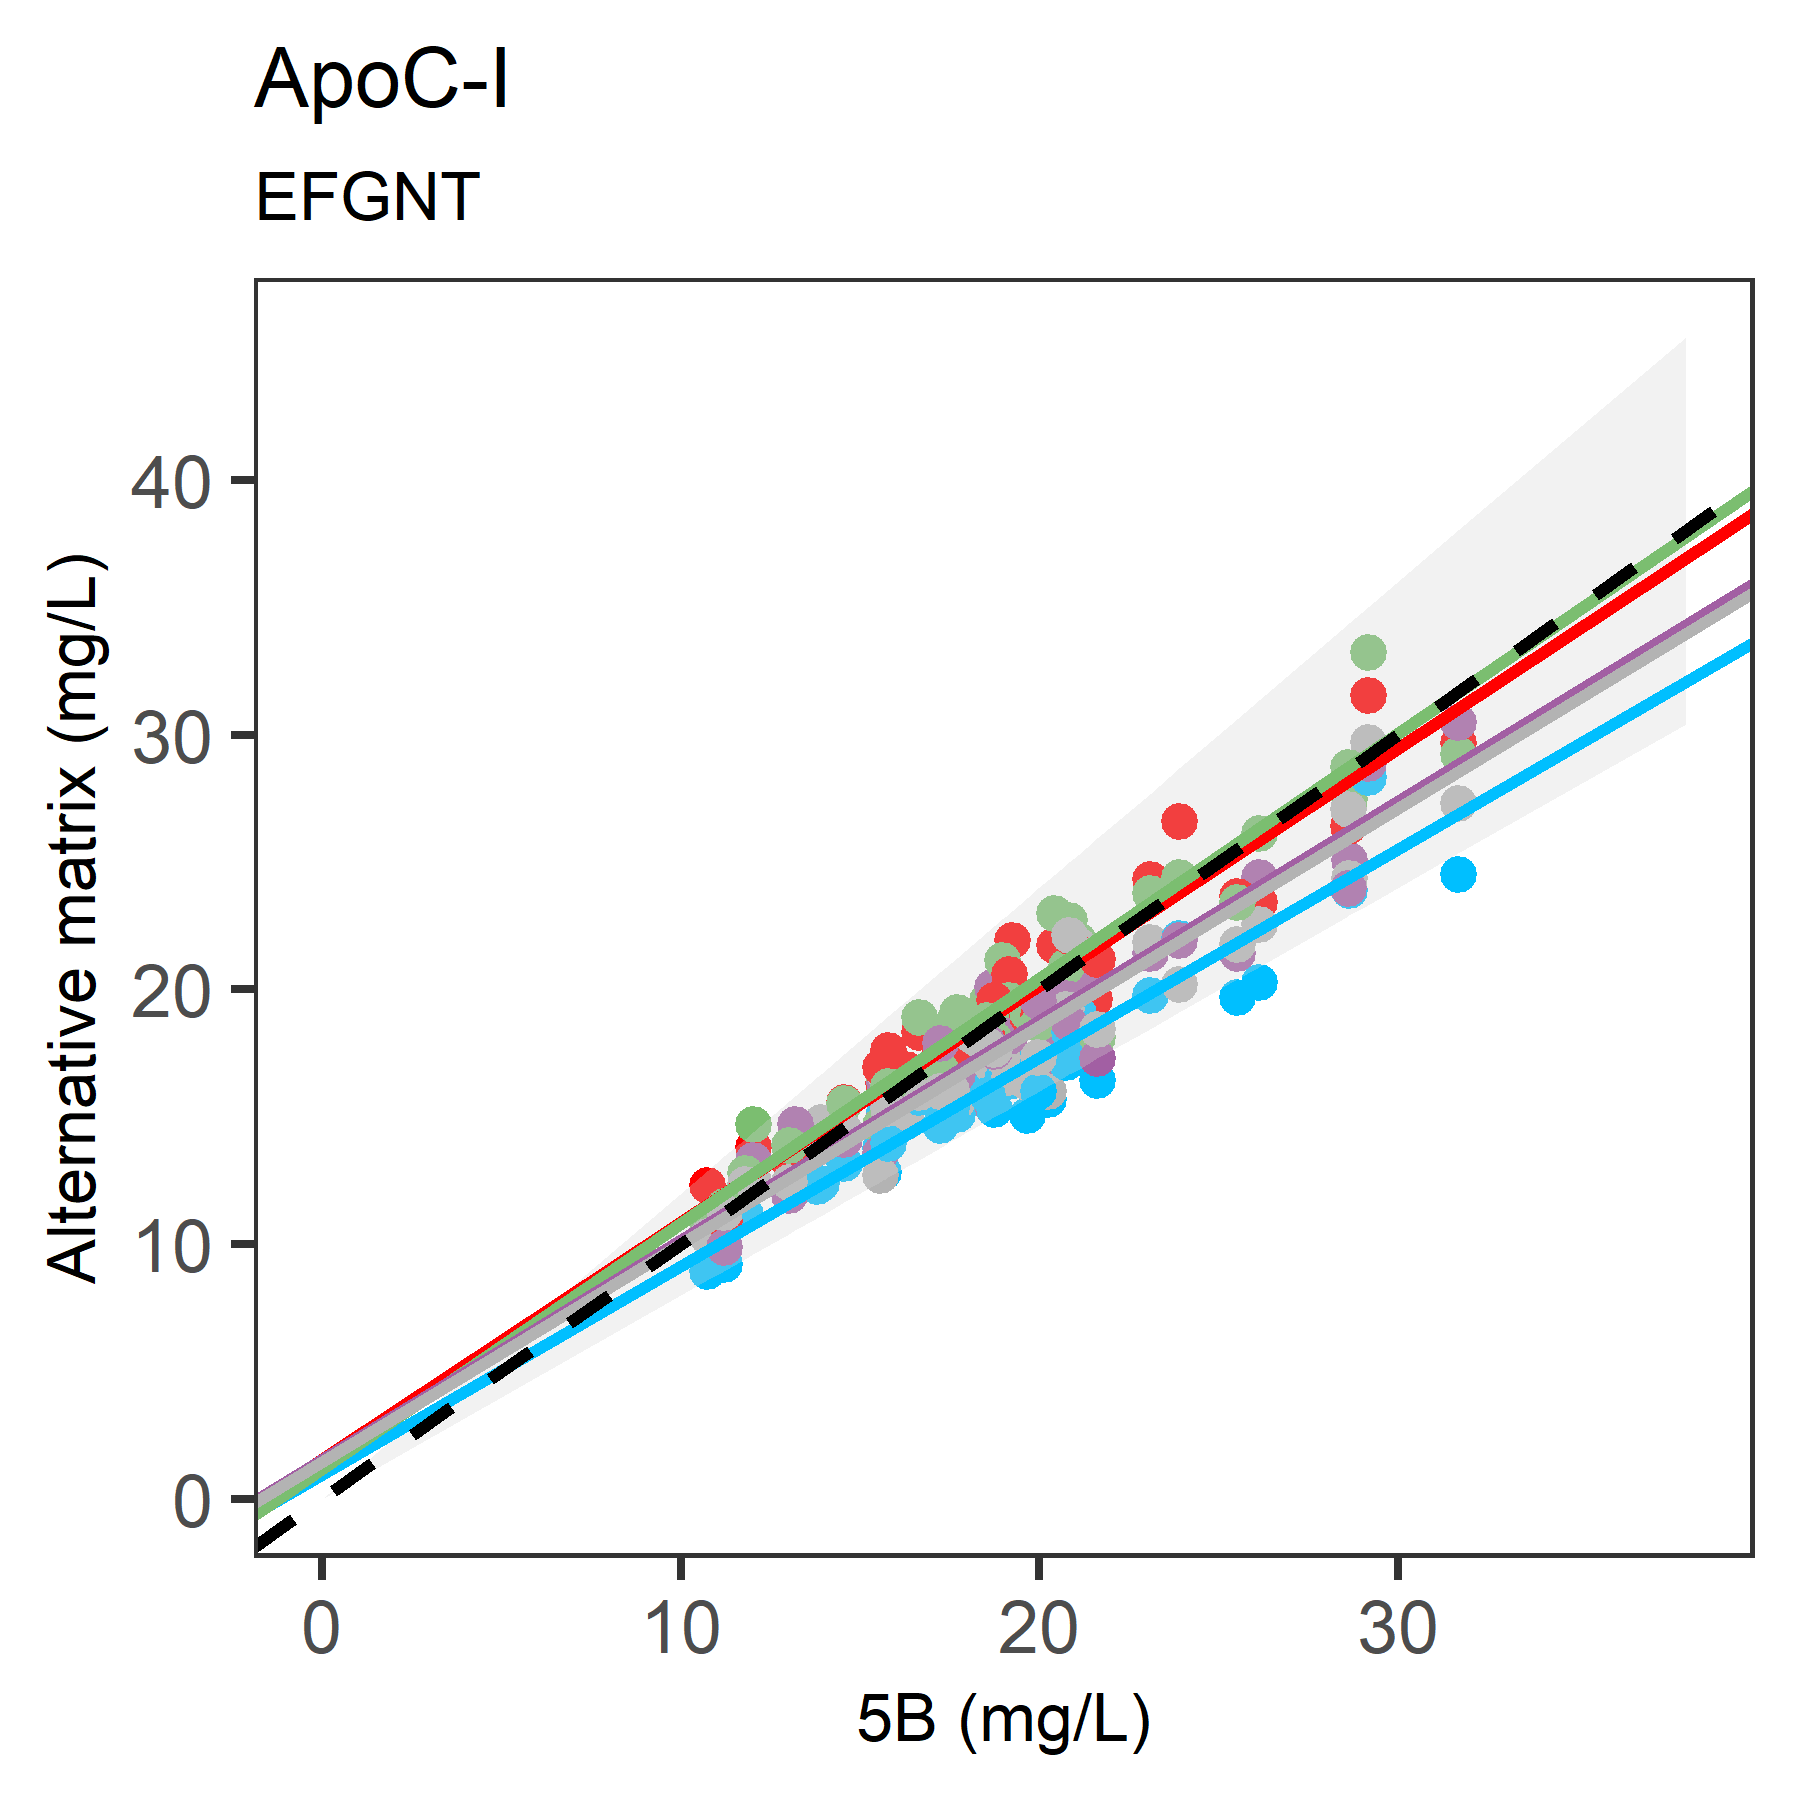

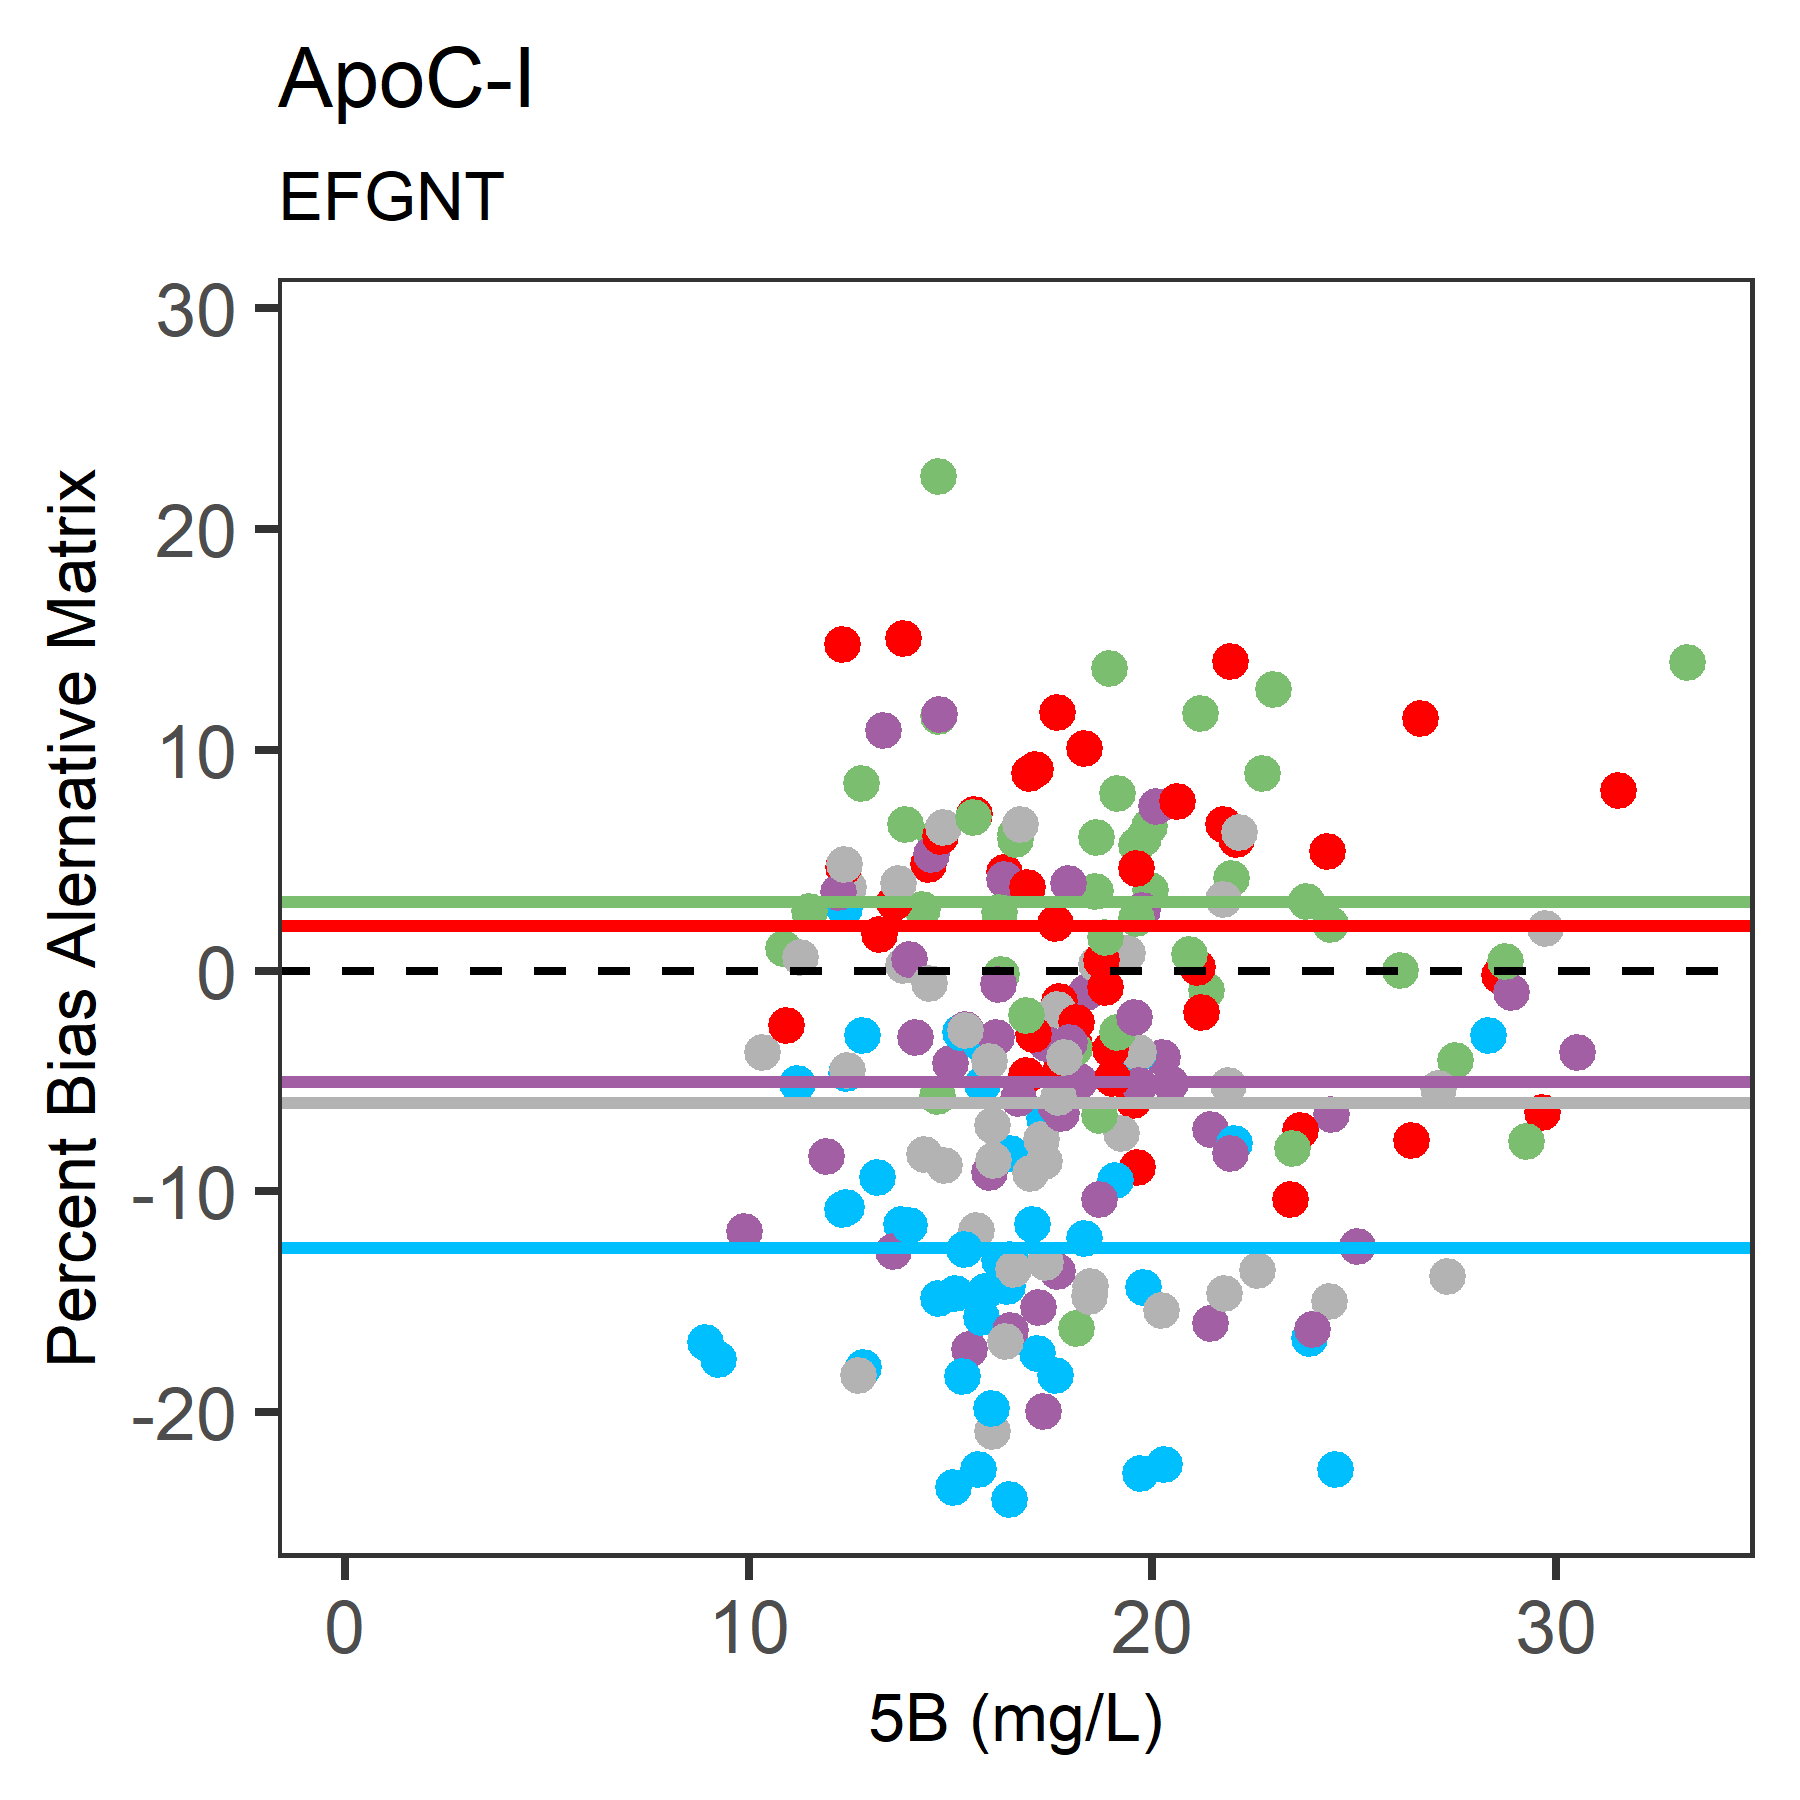

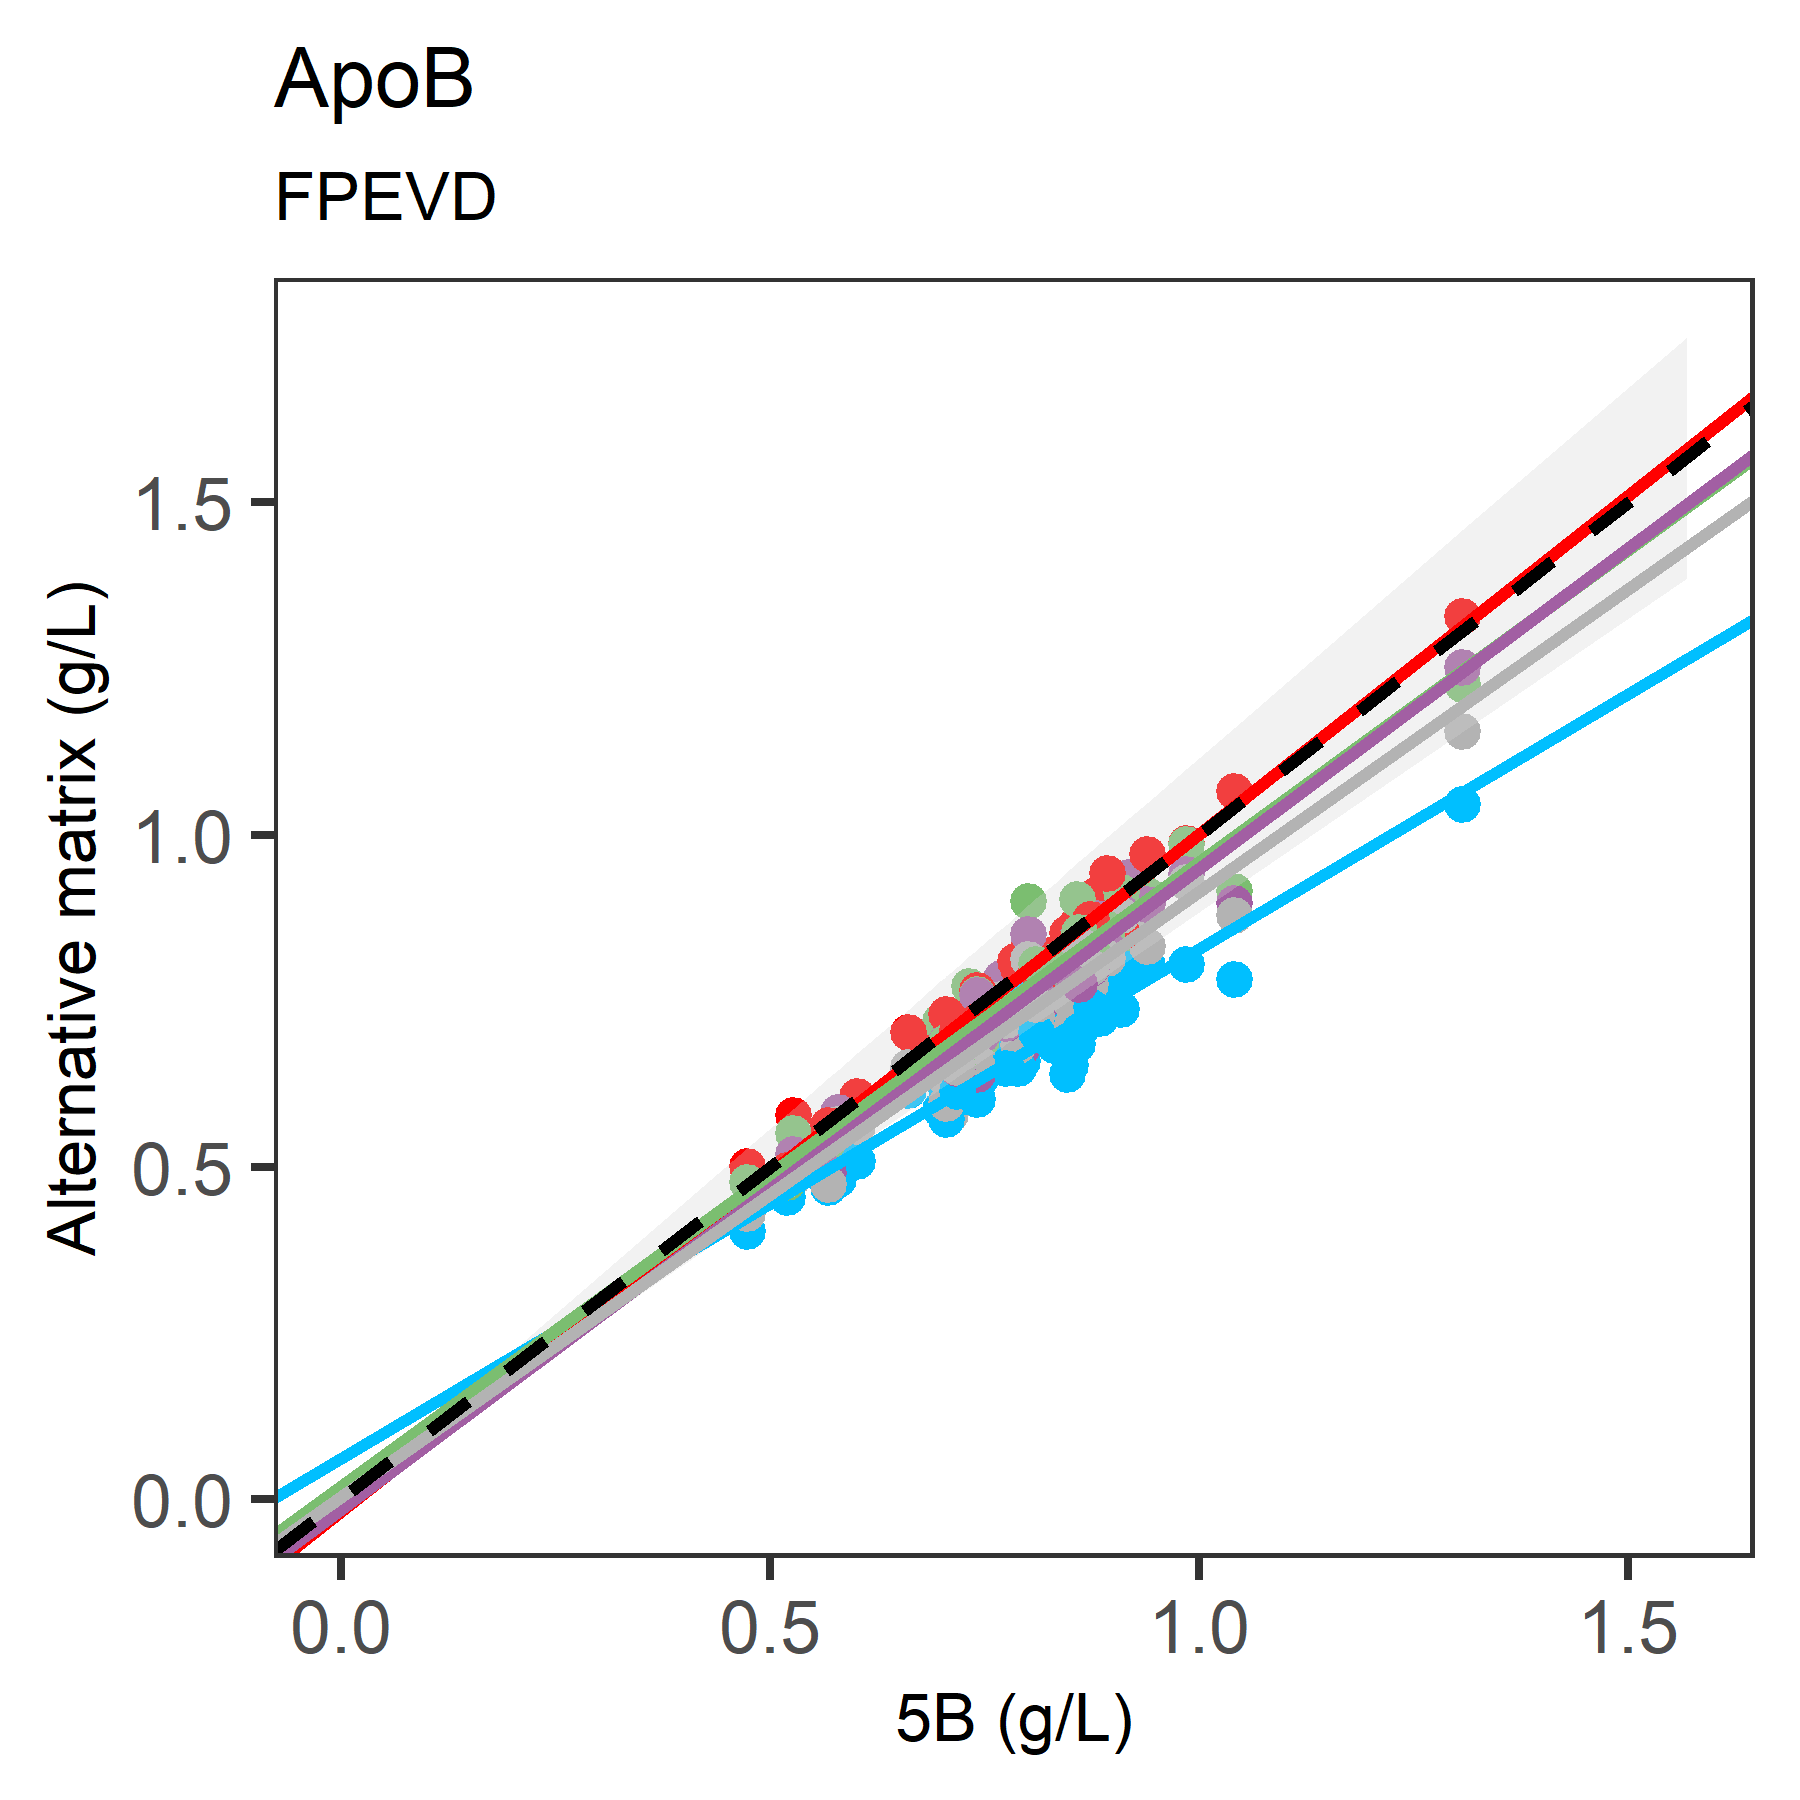

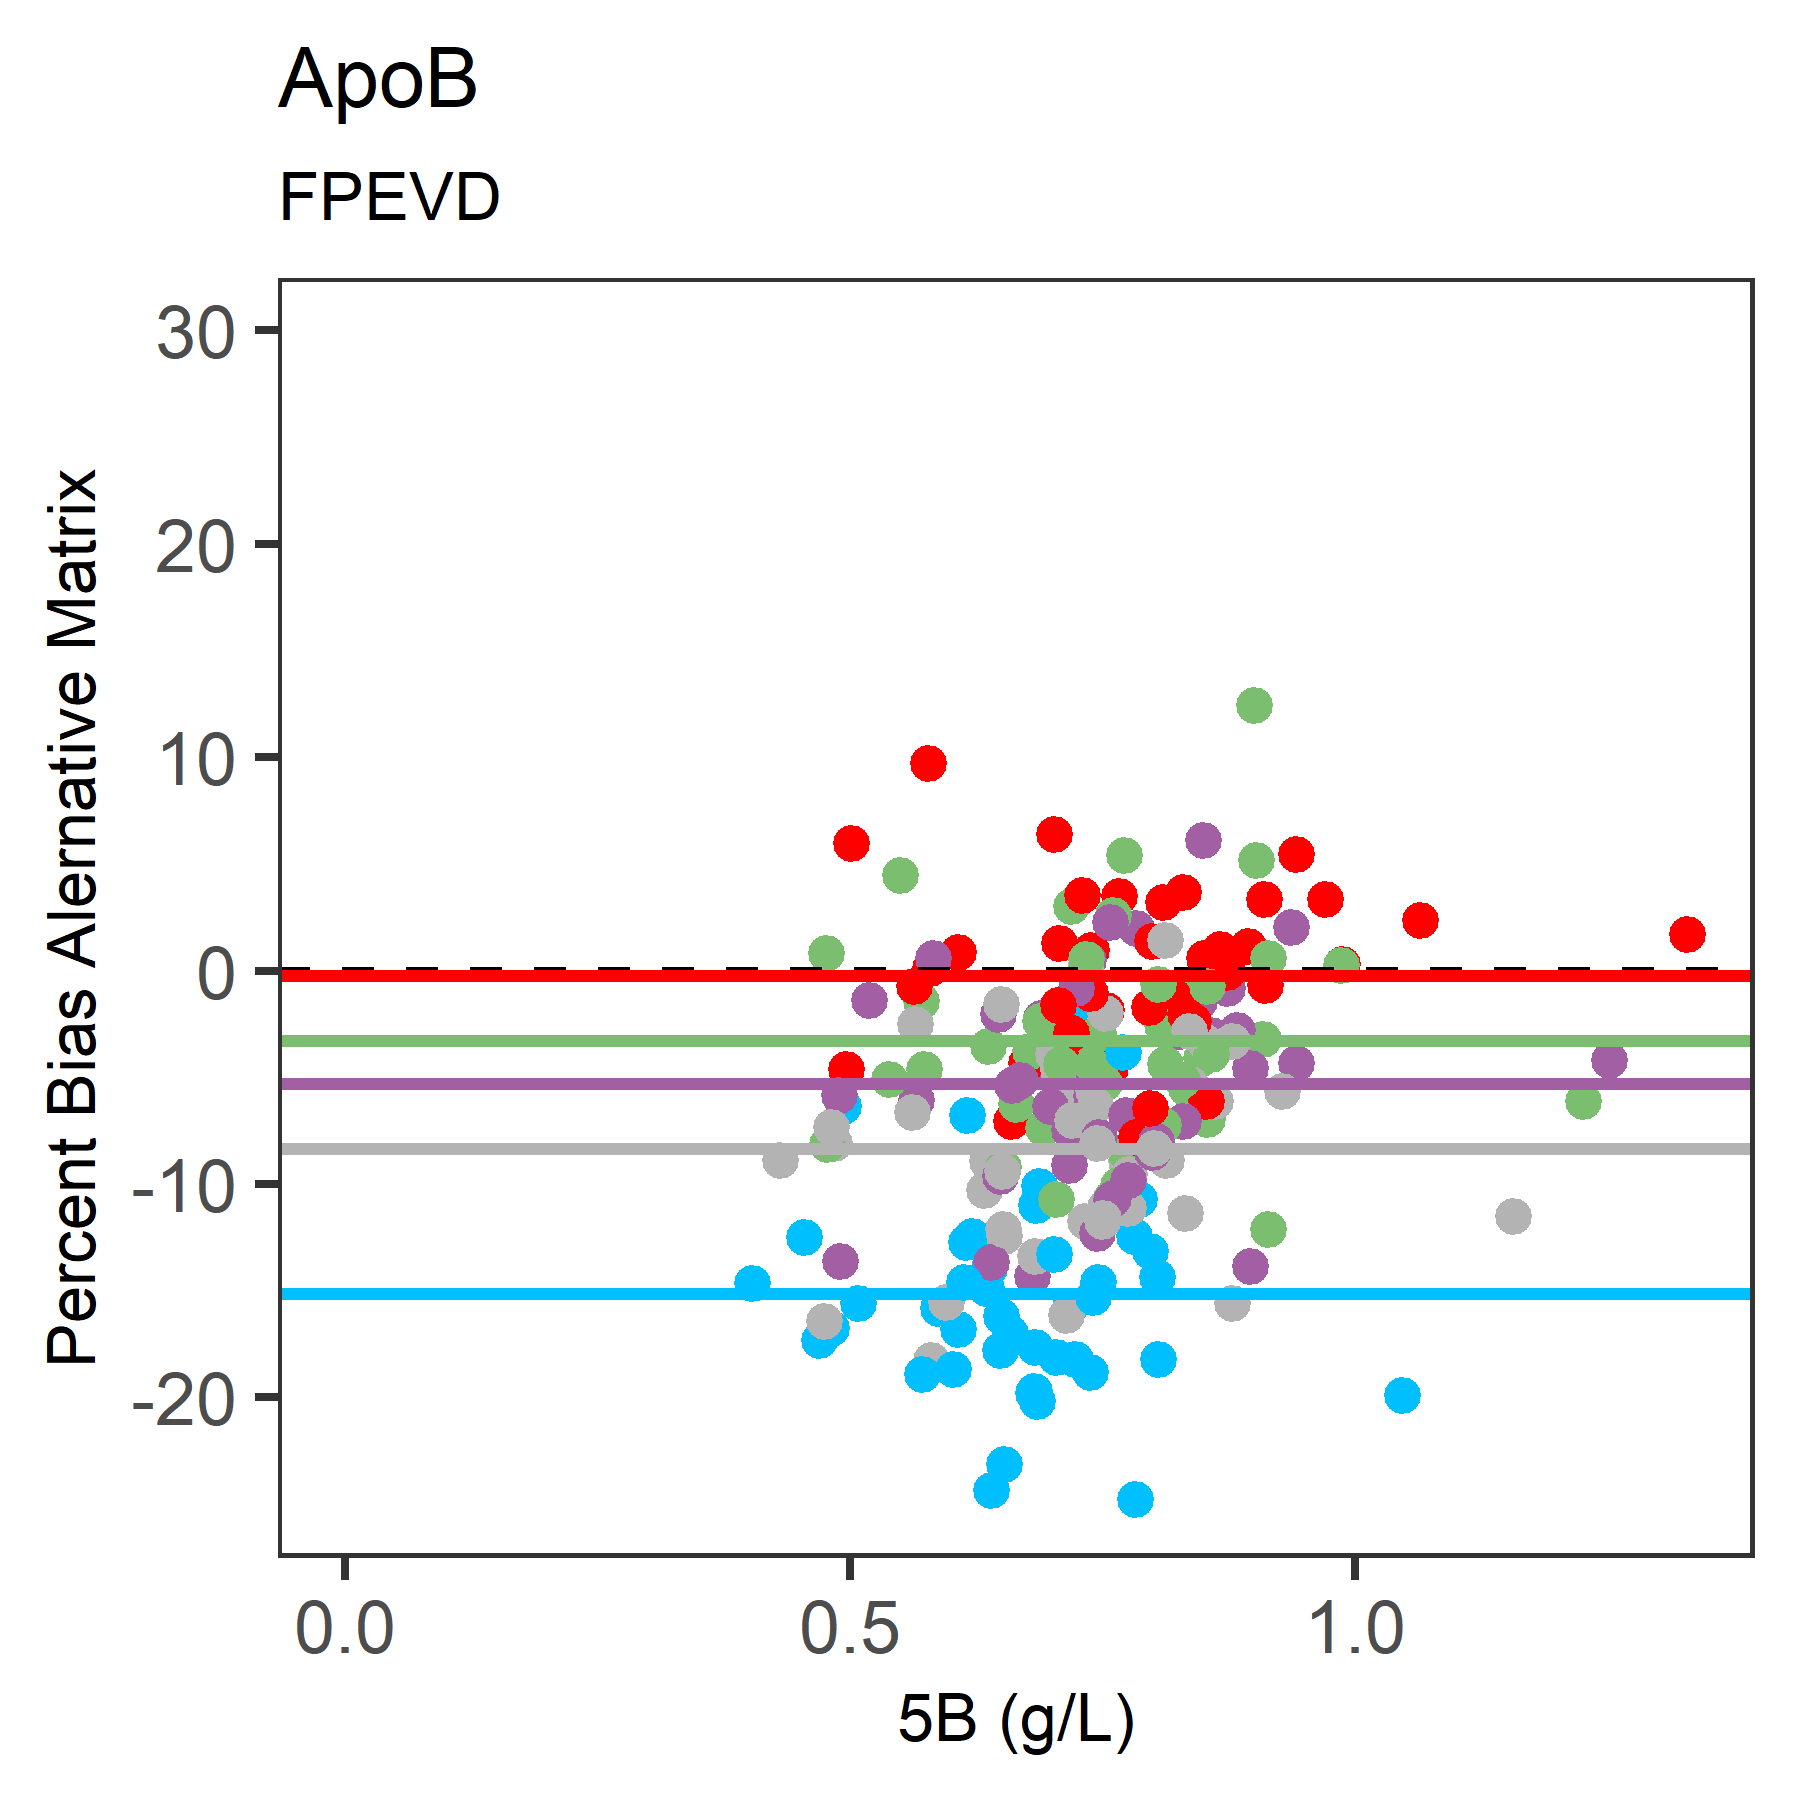

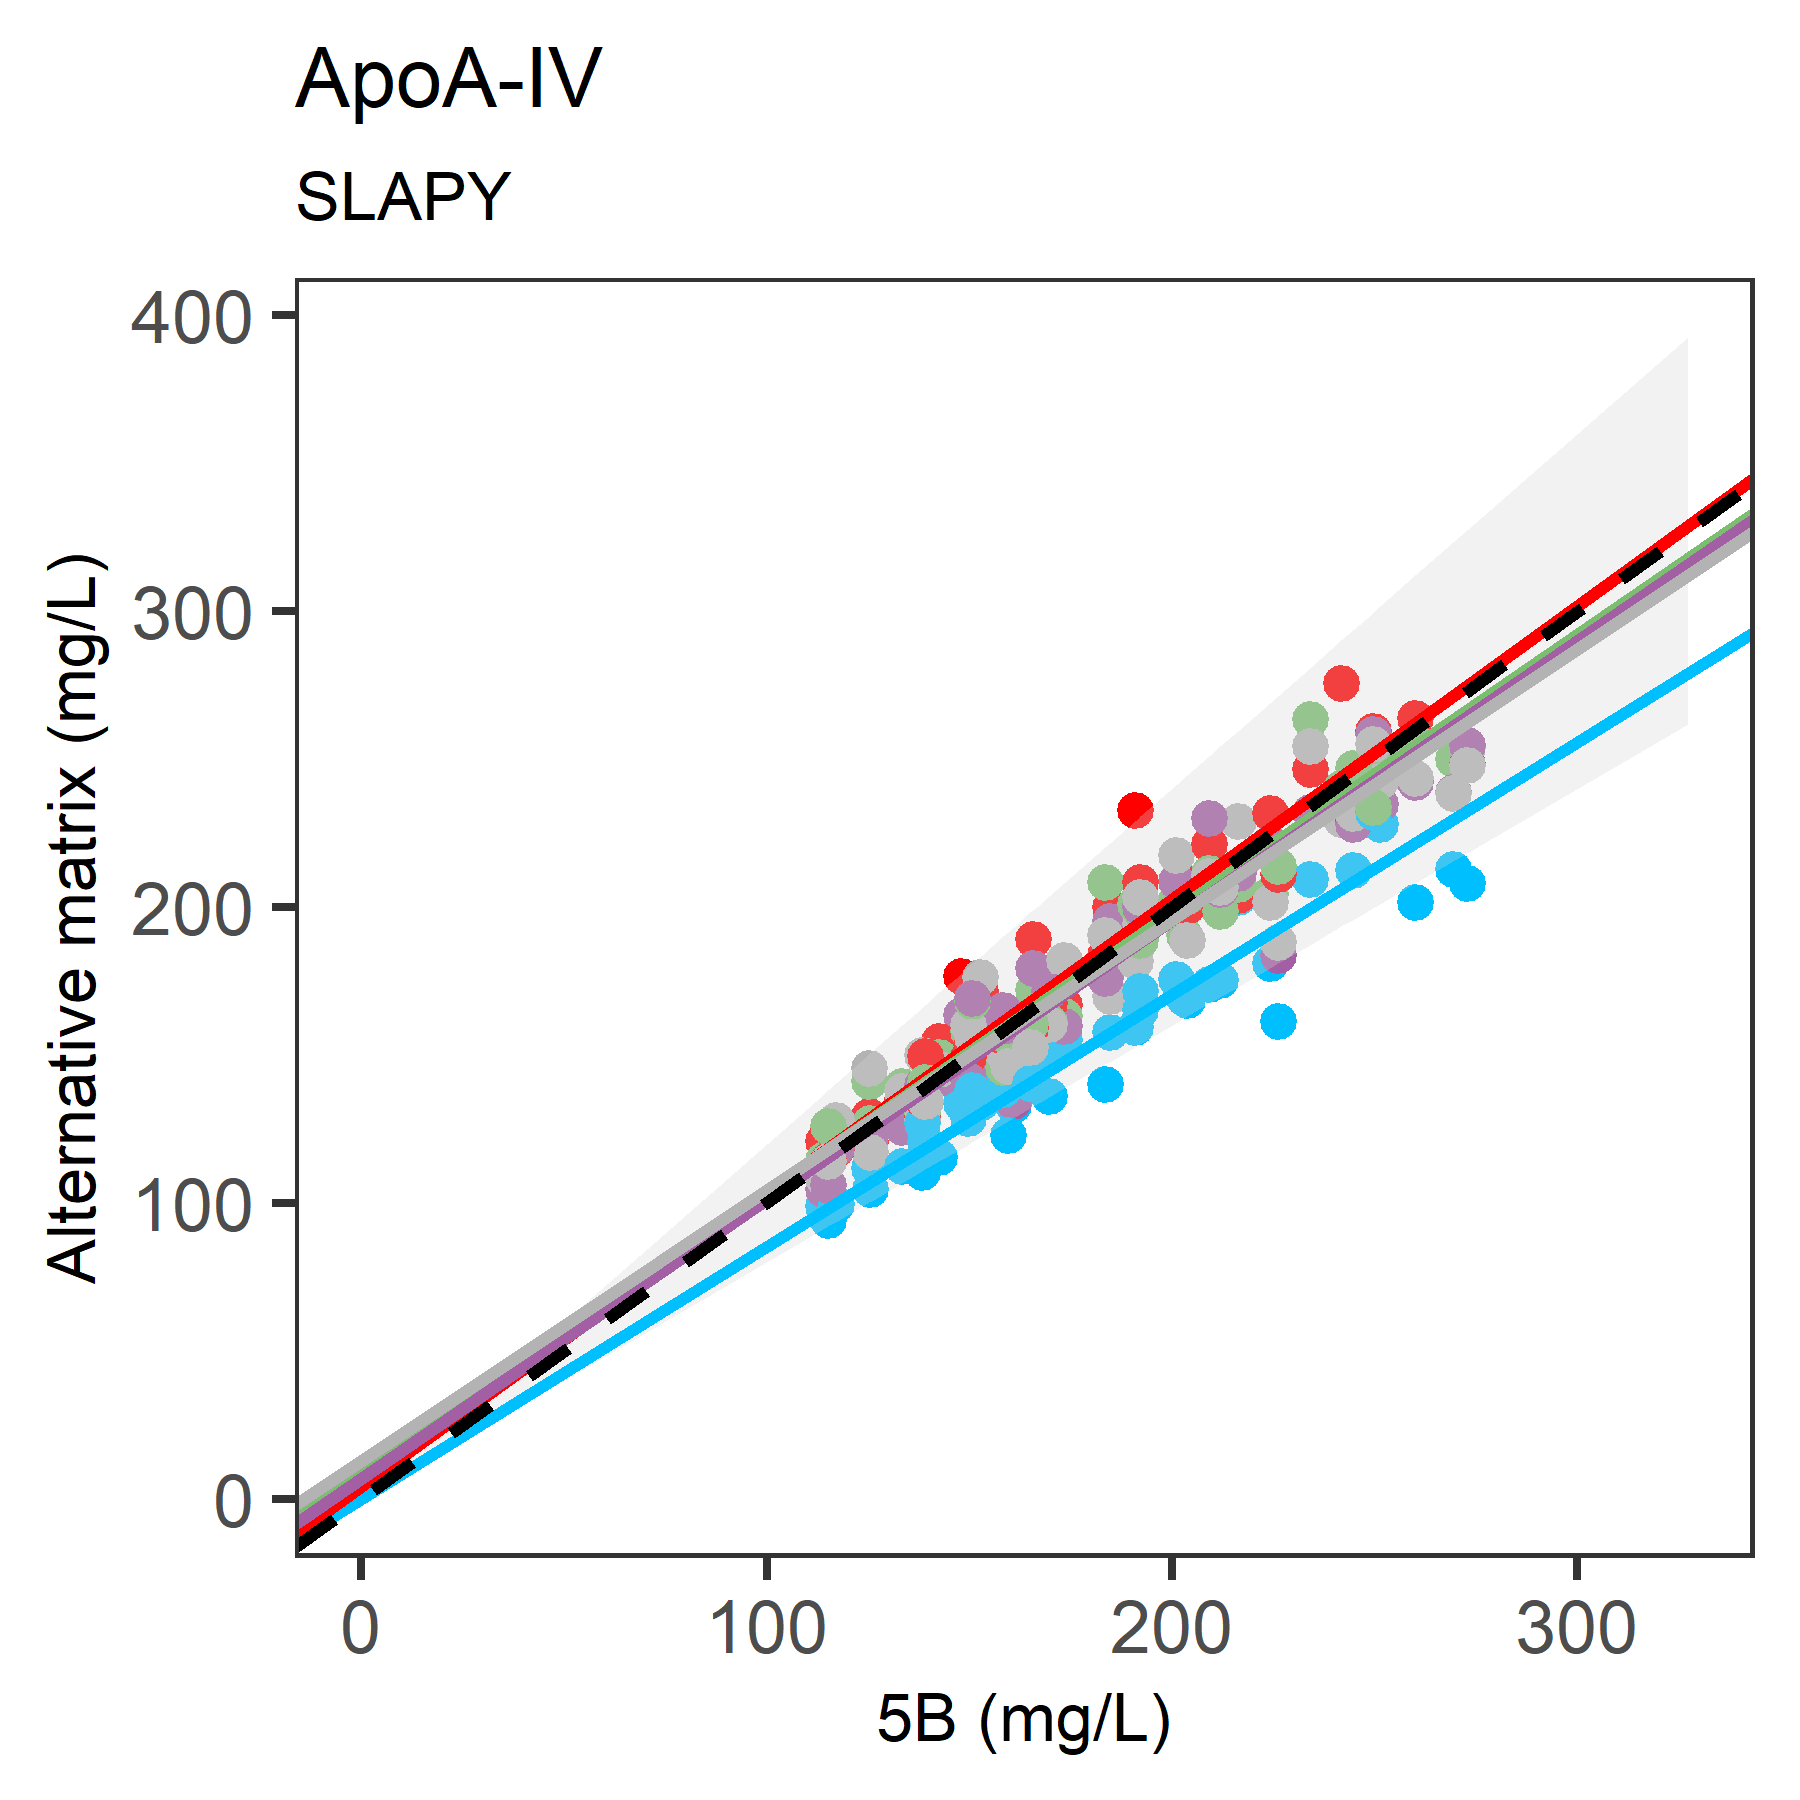

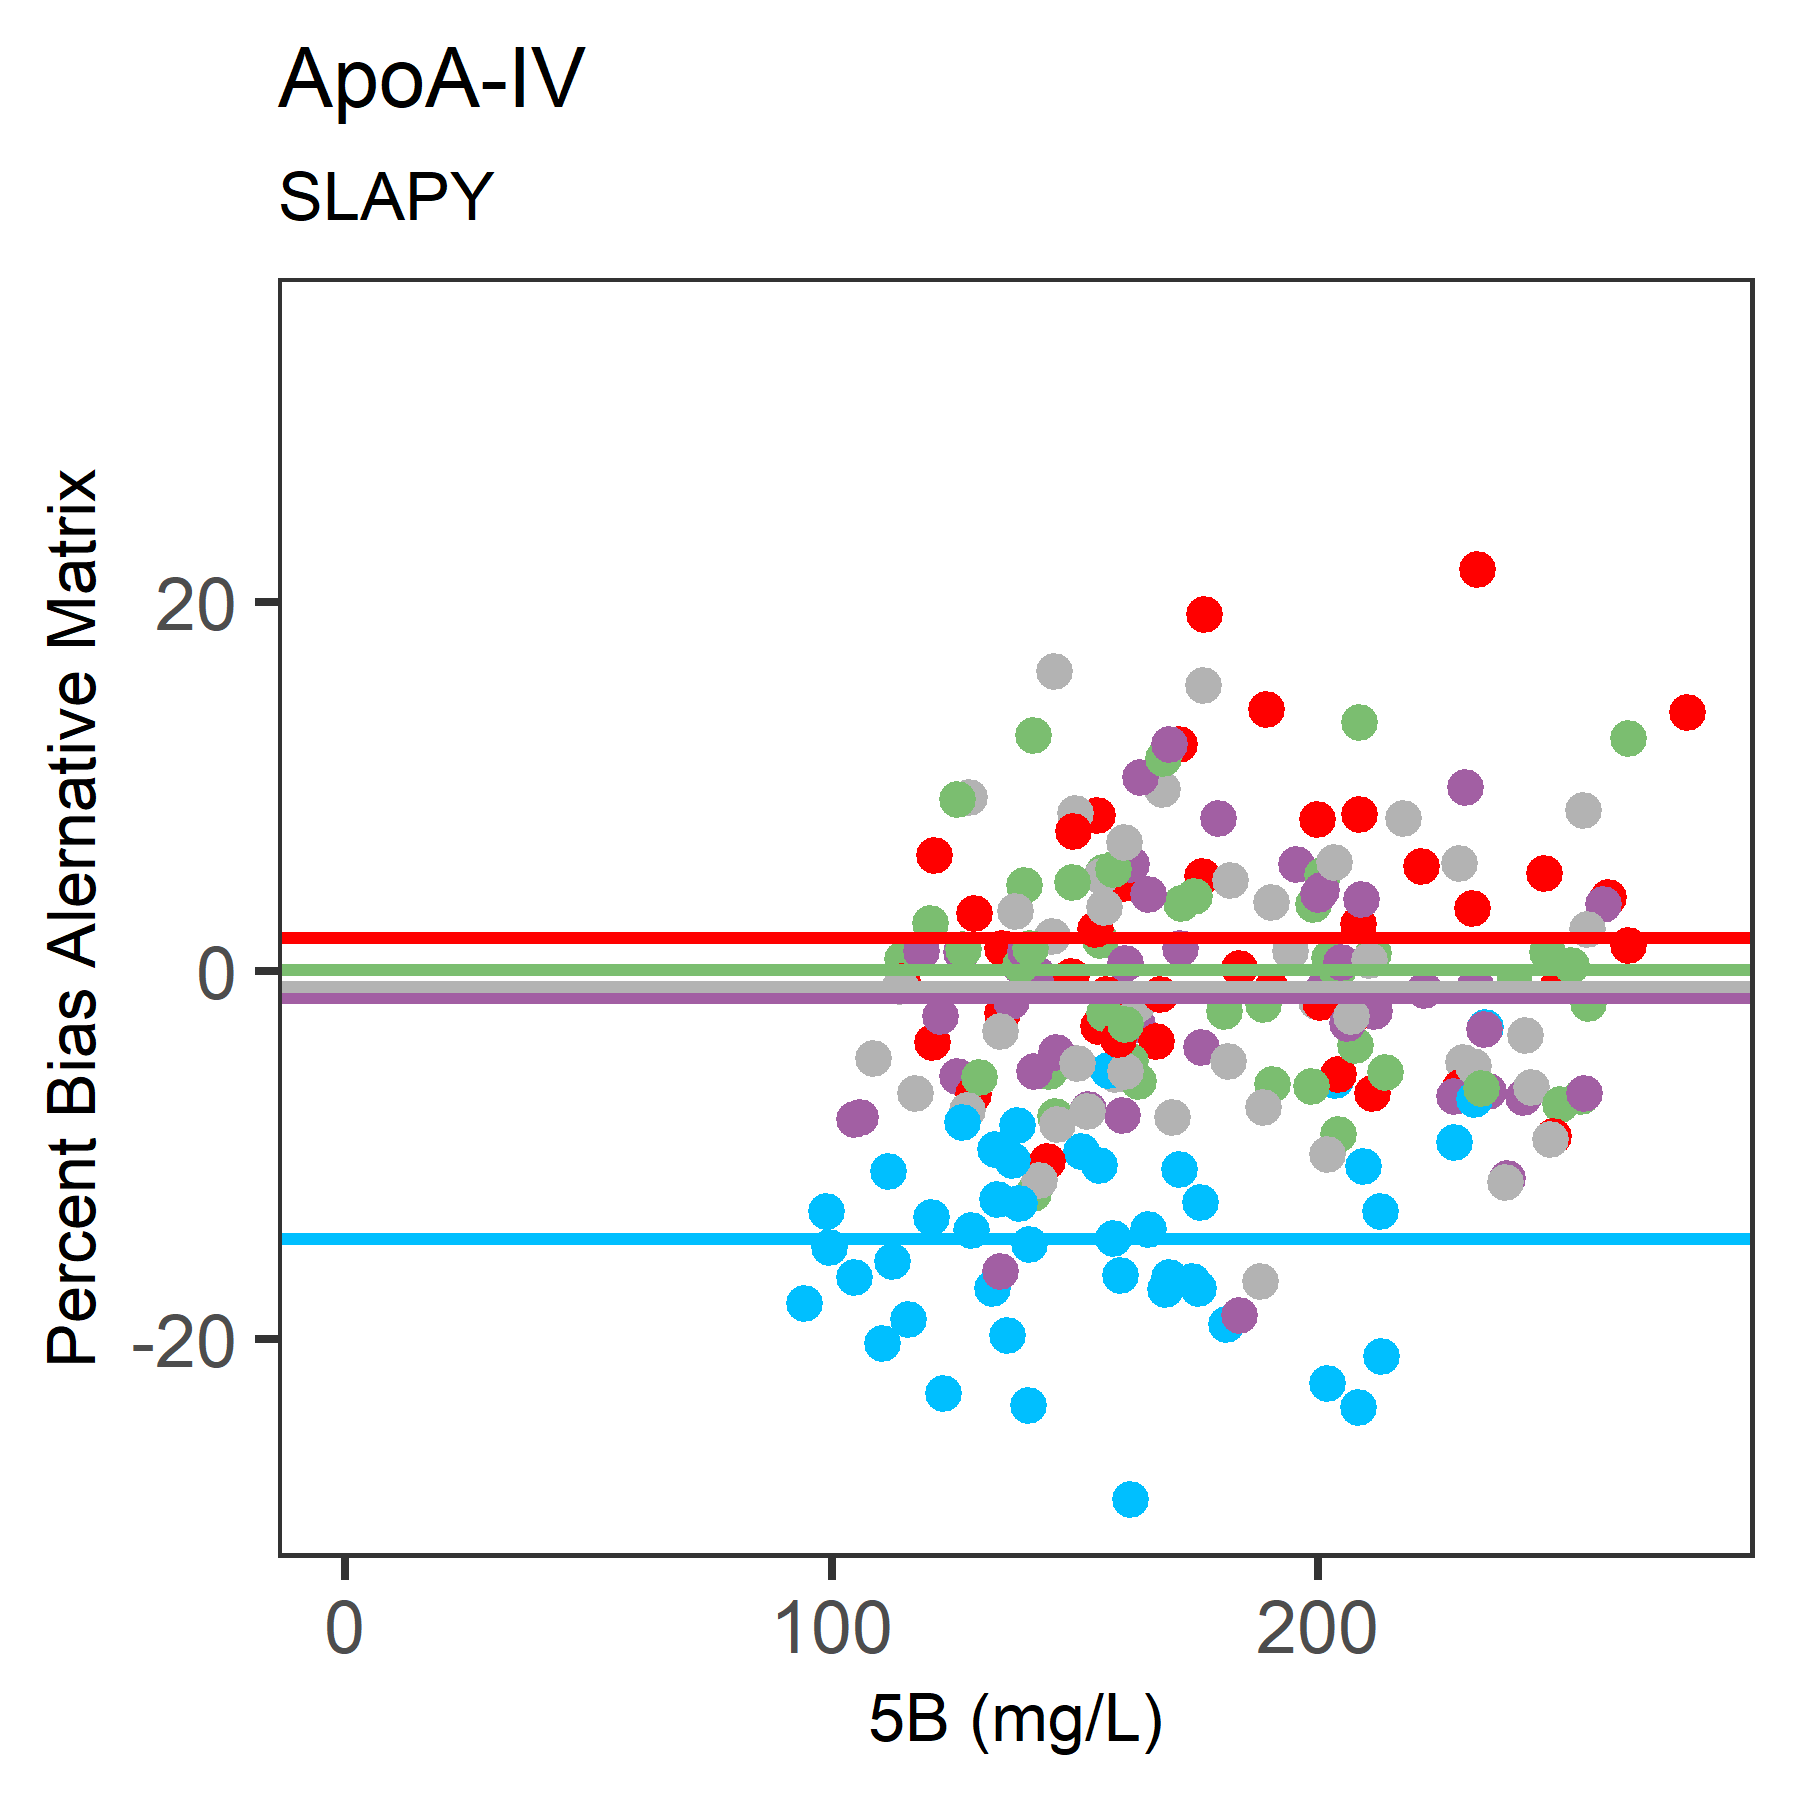

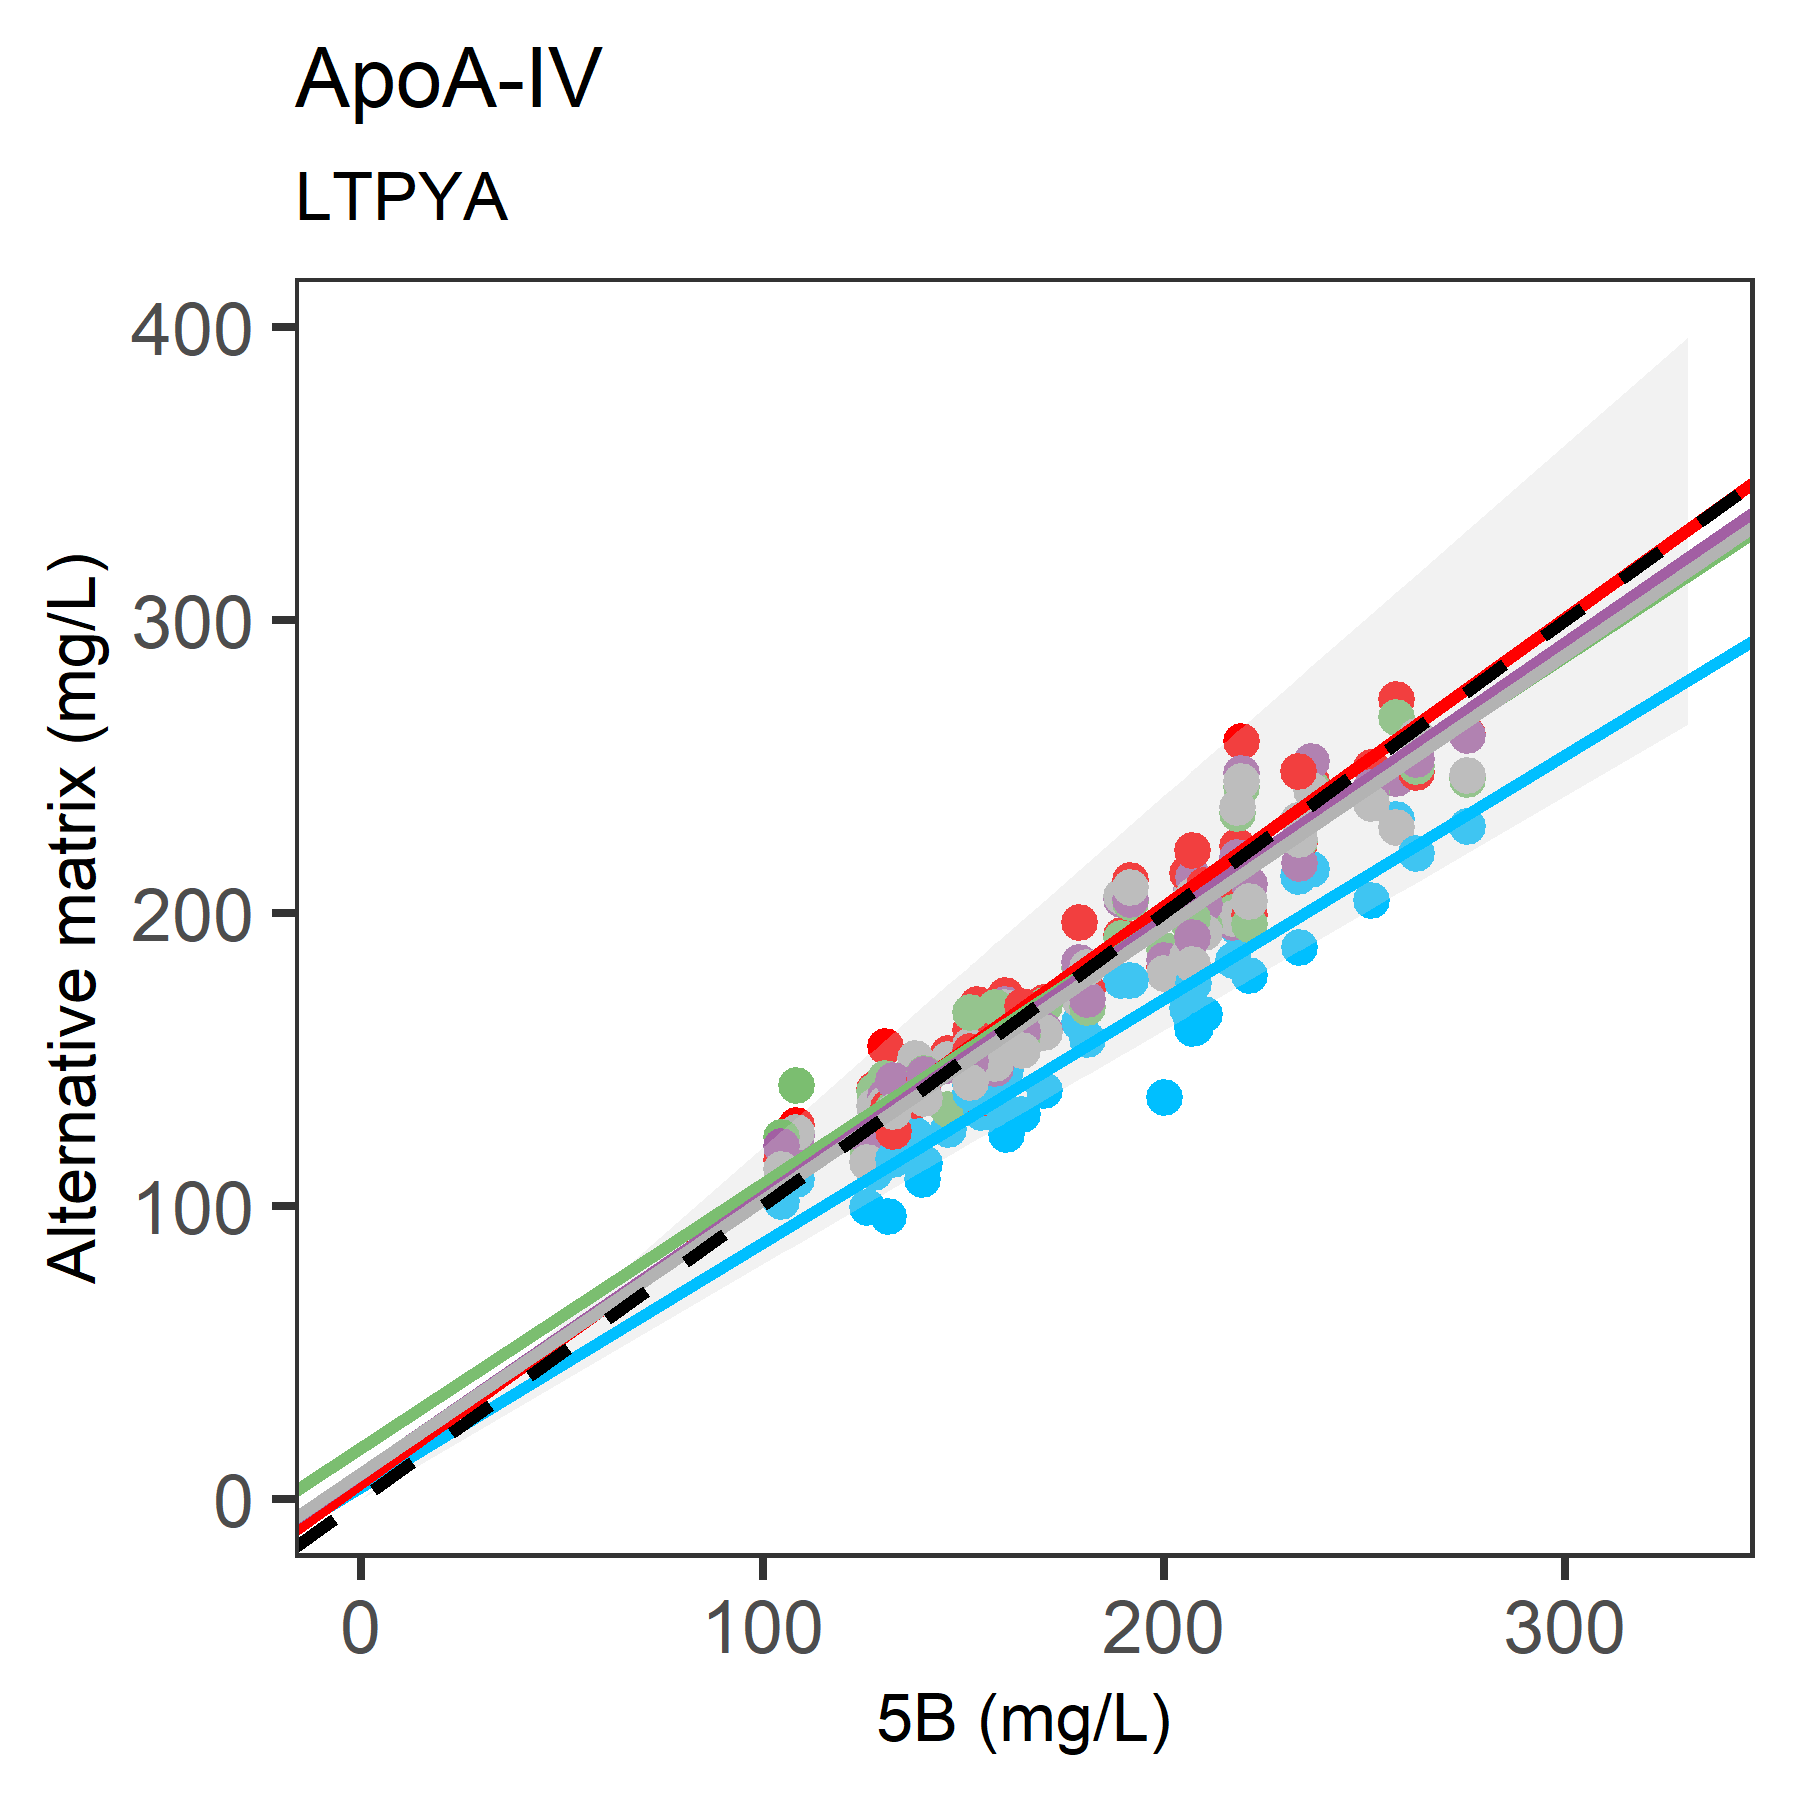

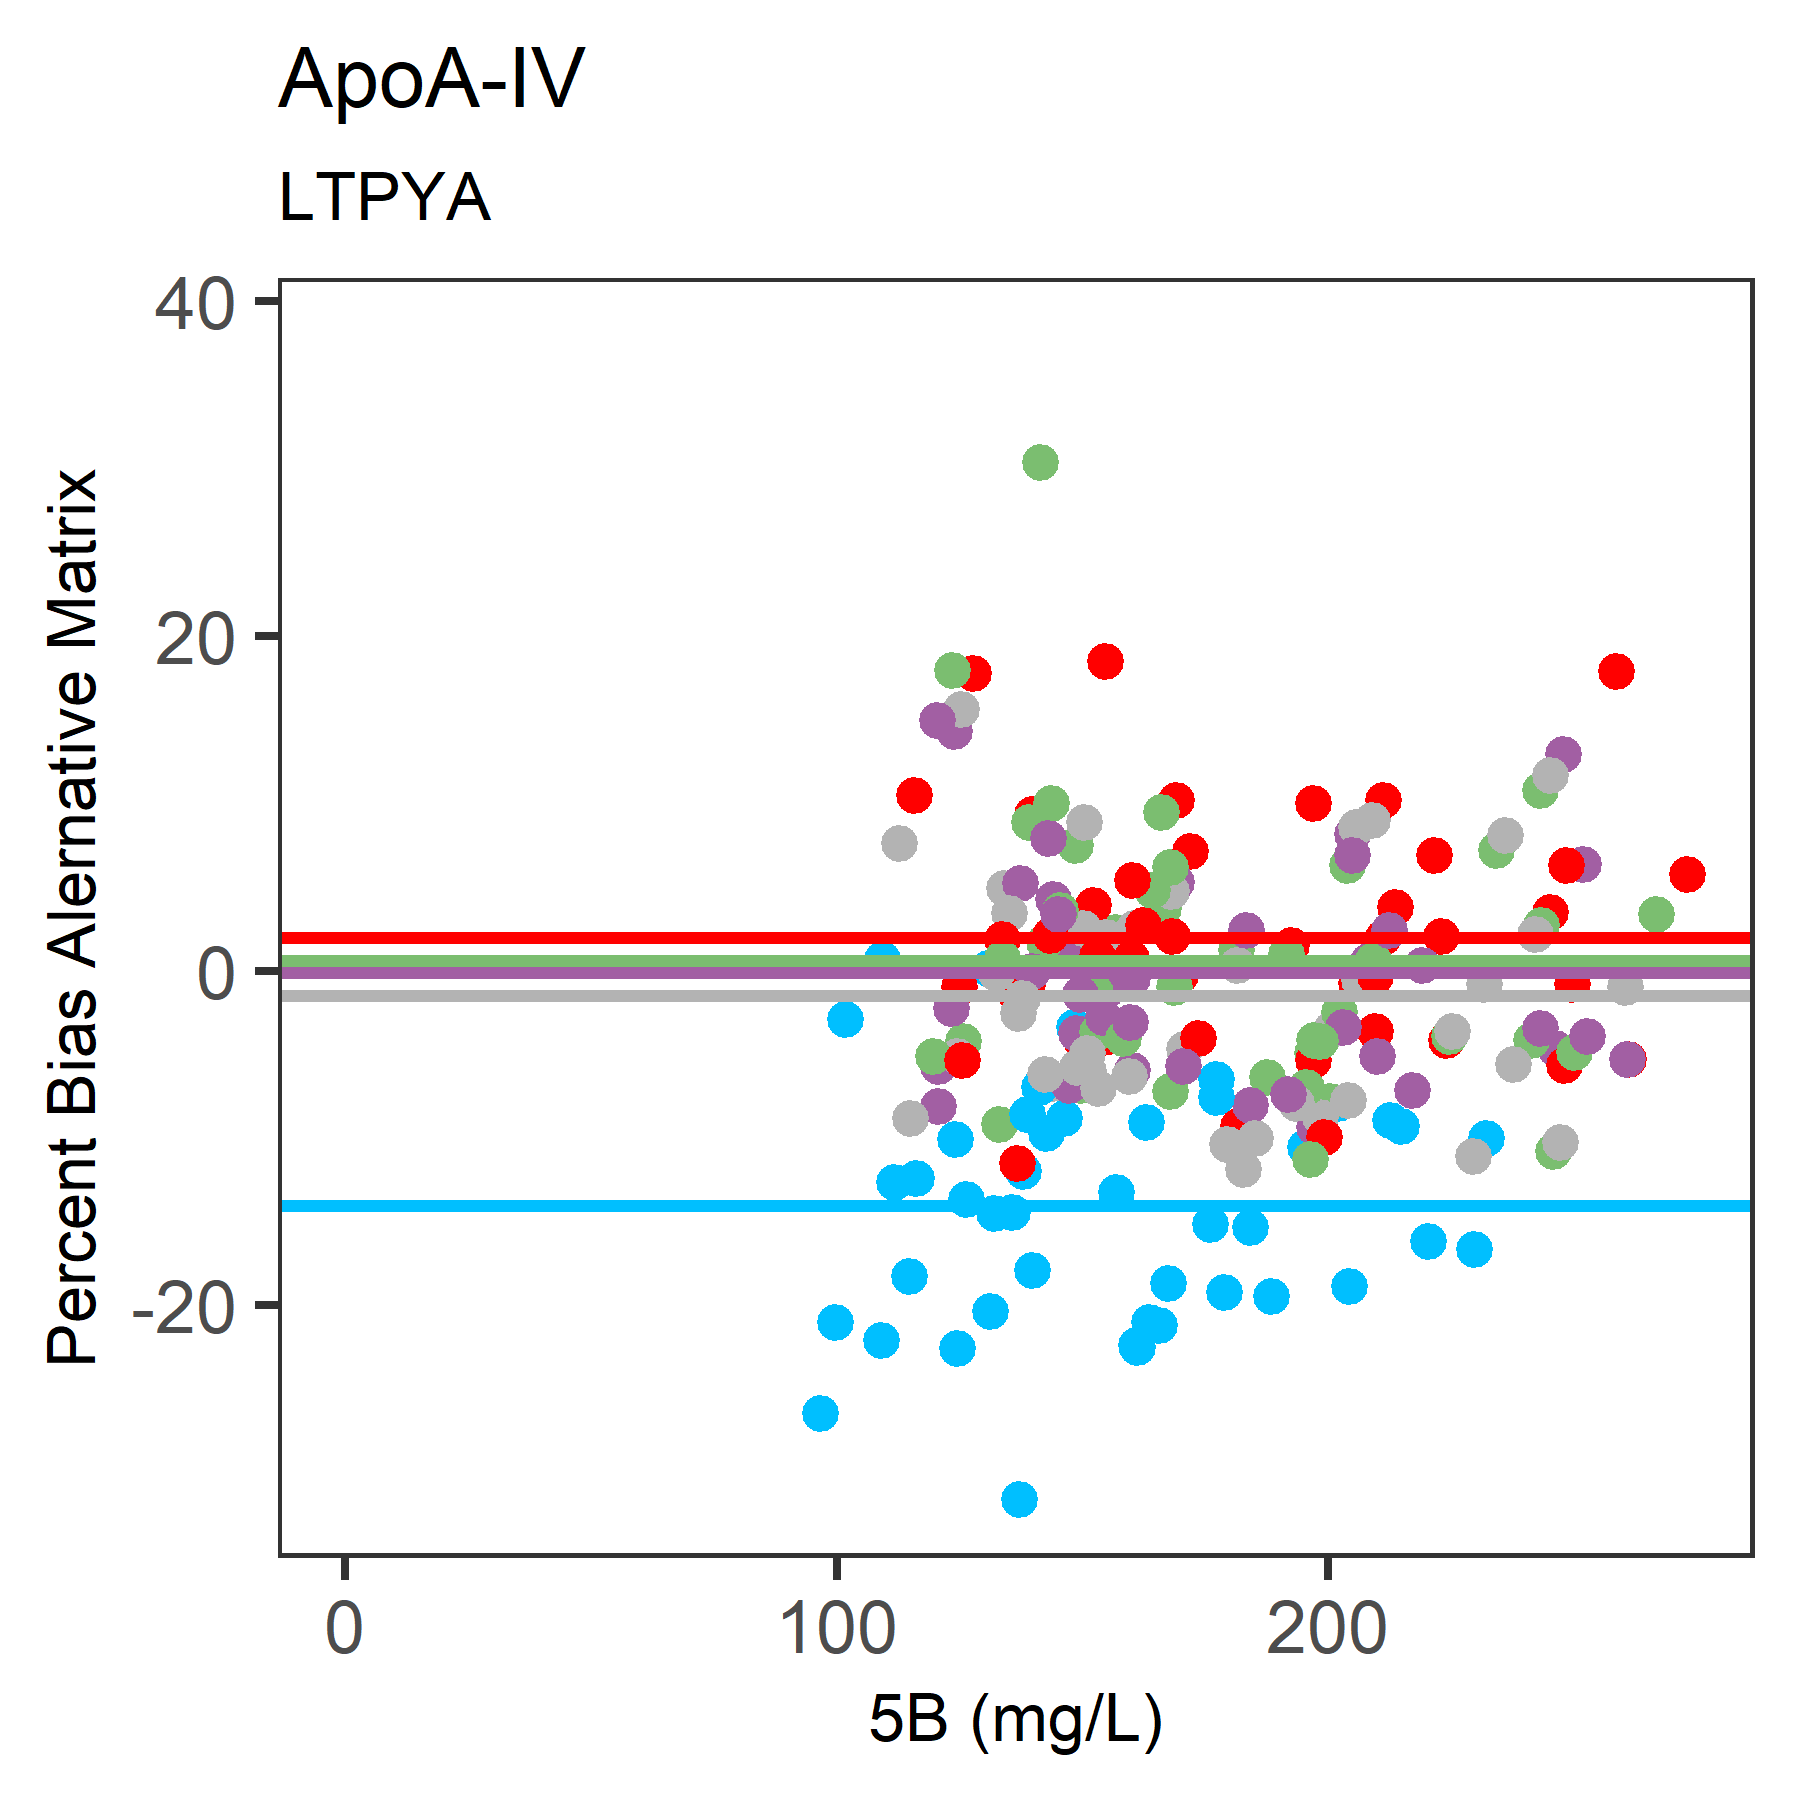

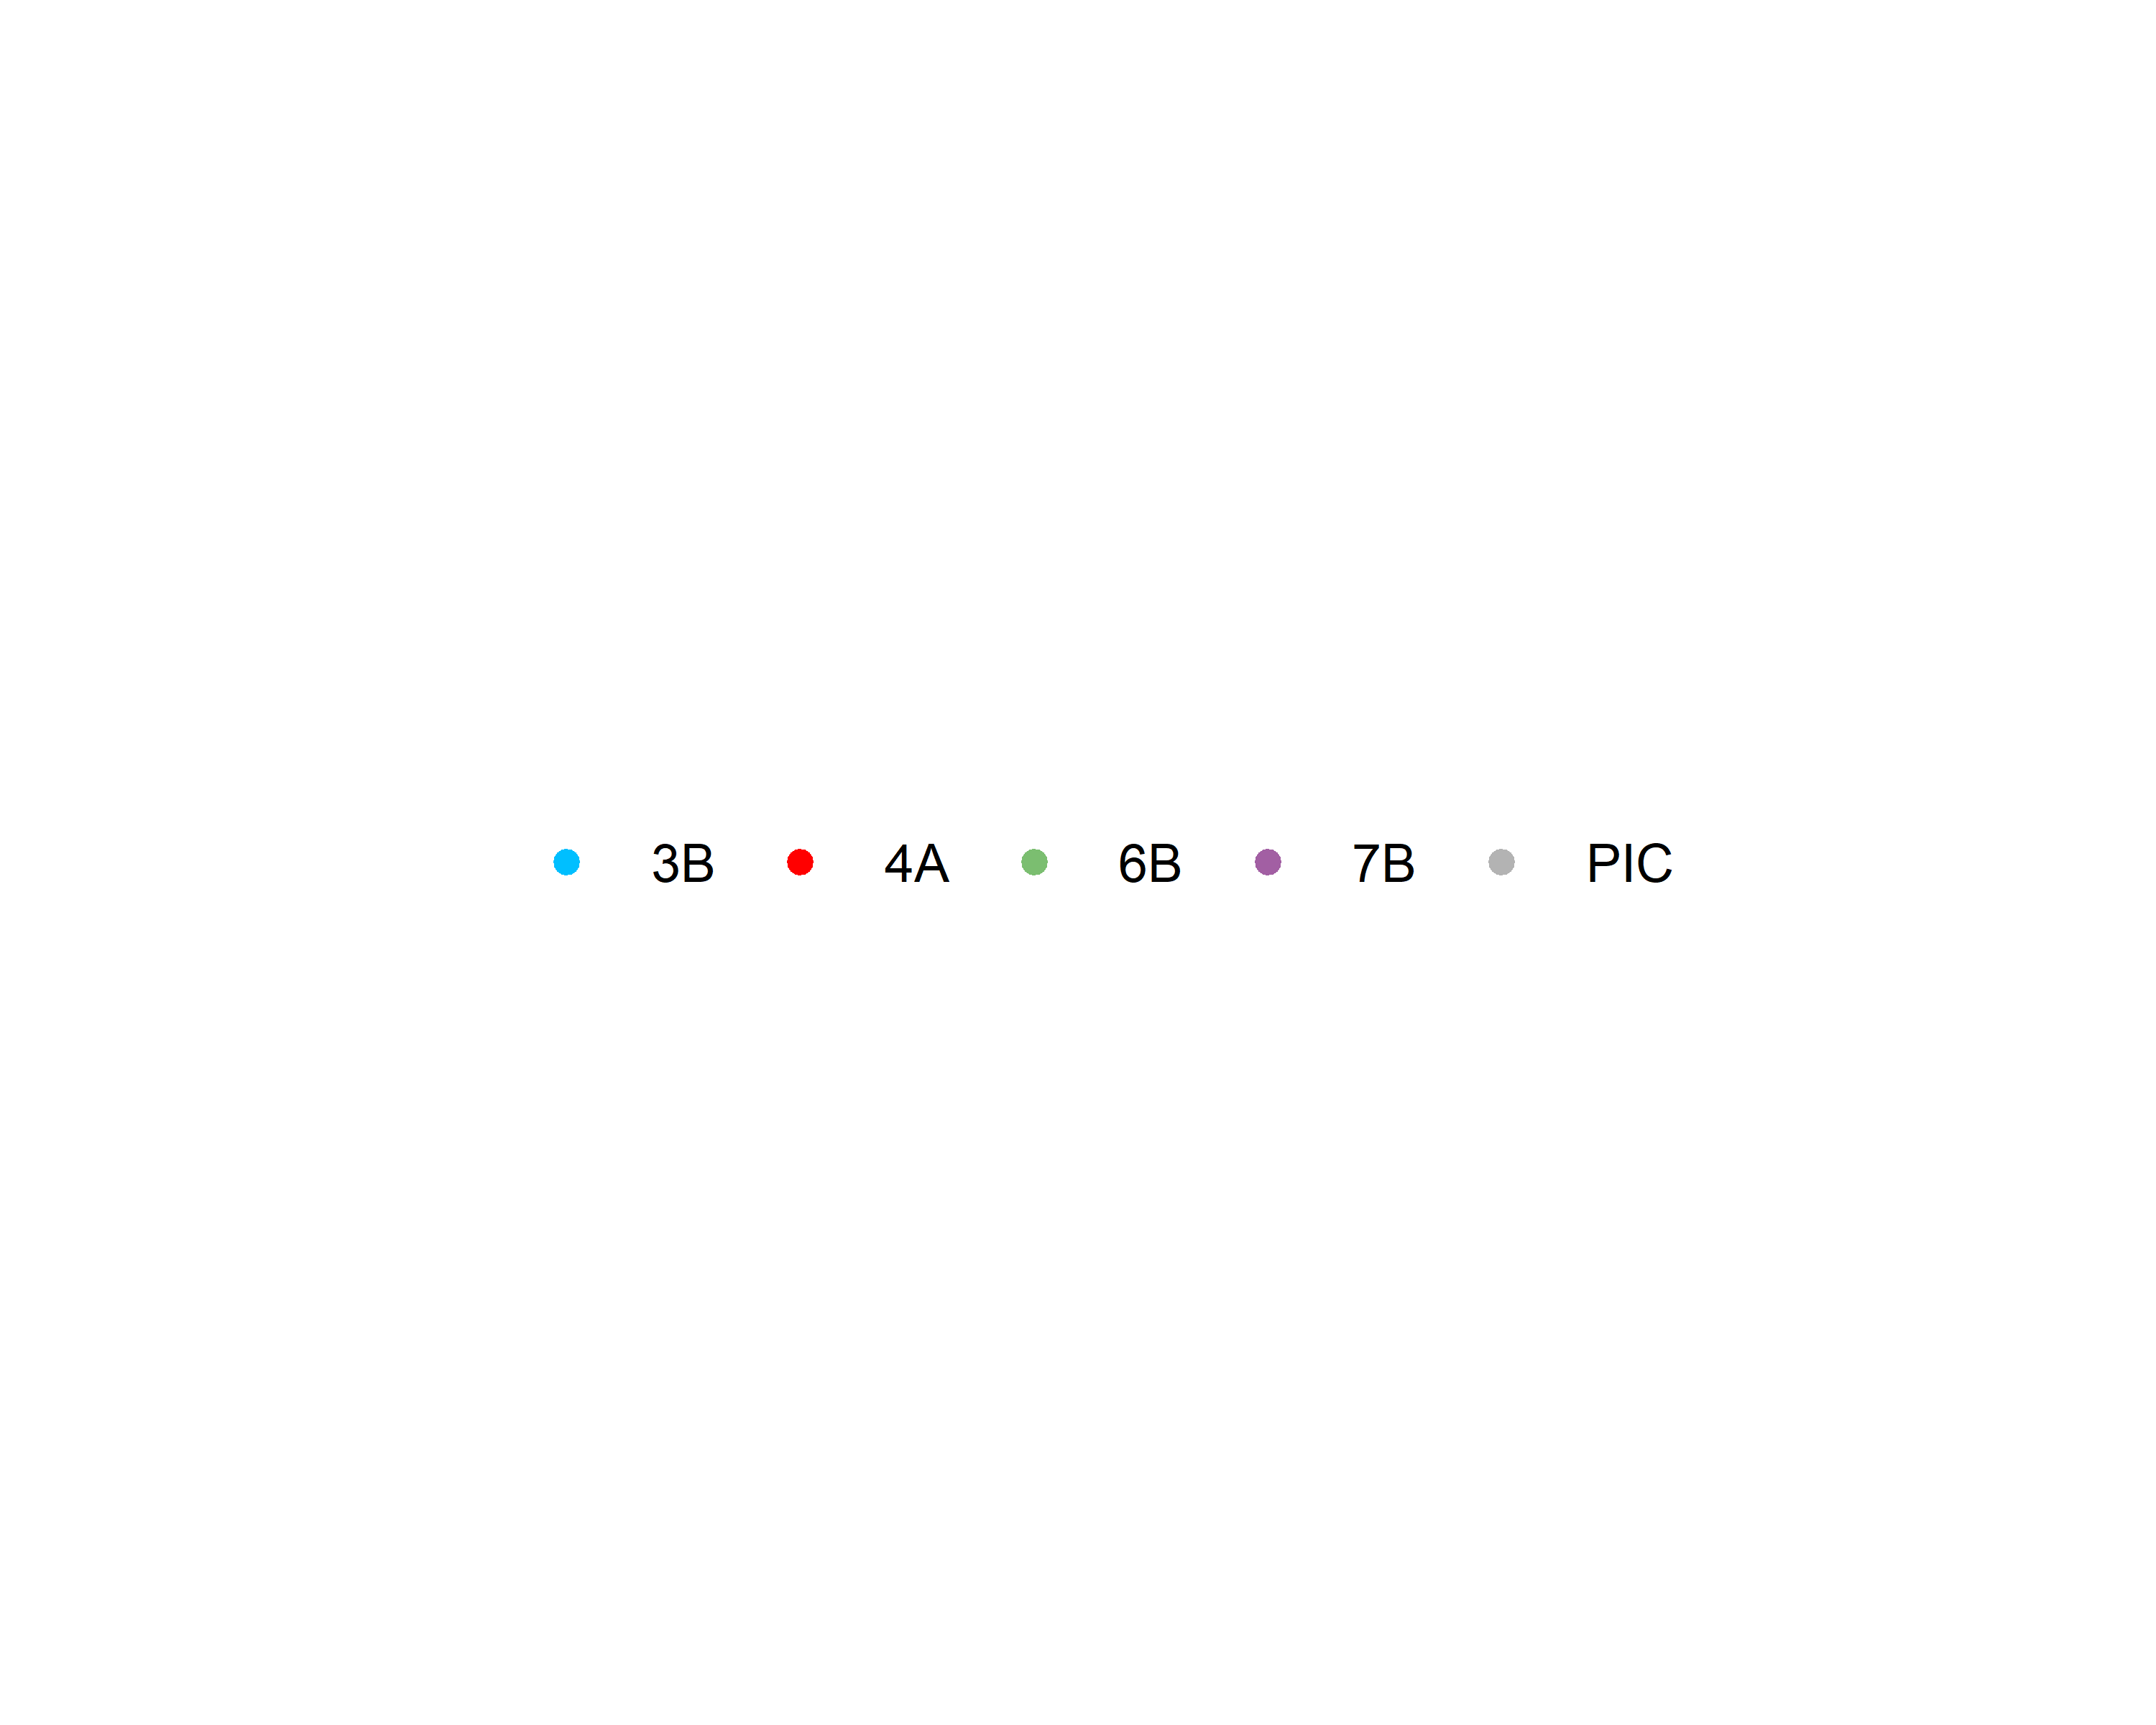


S1(A)


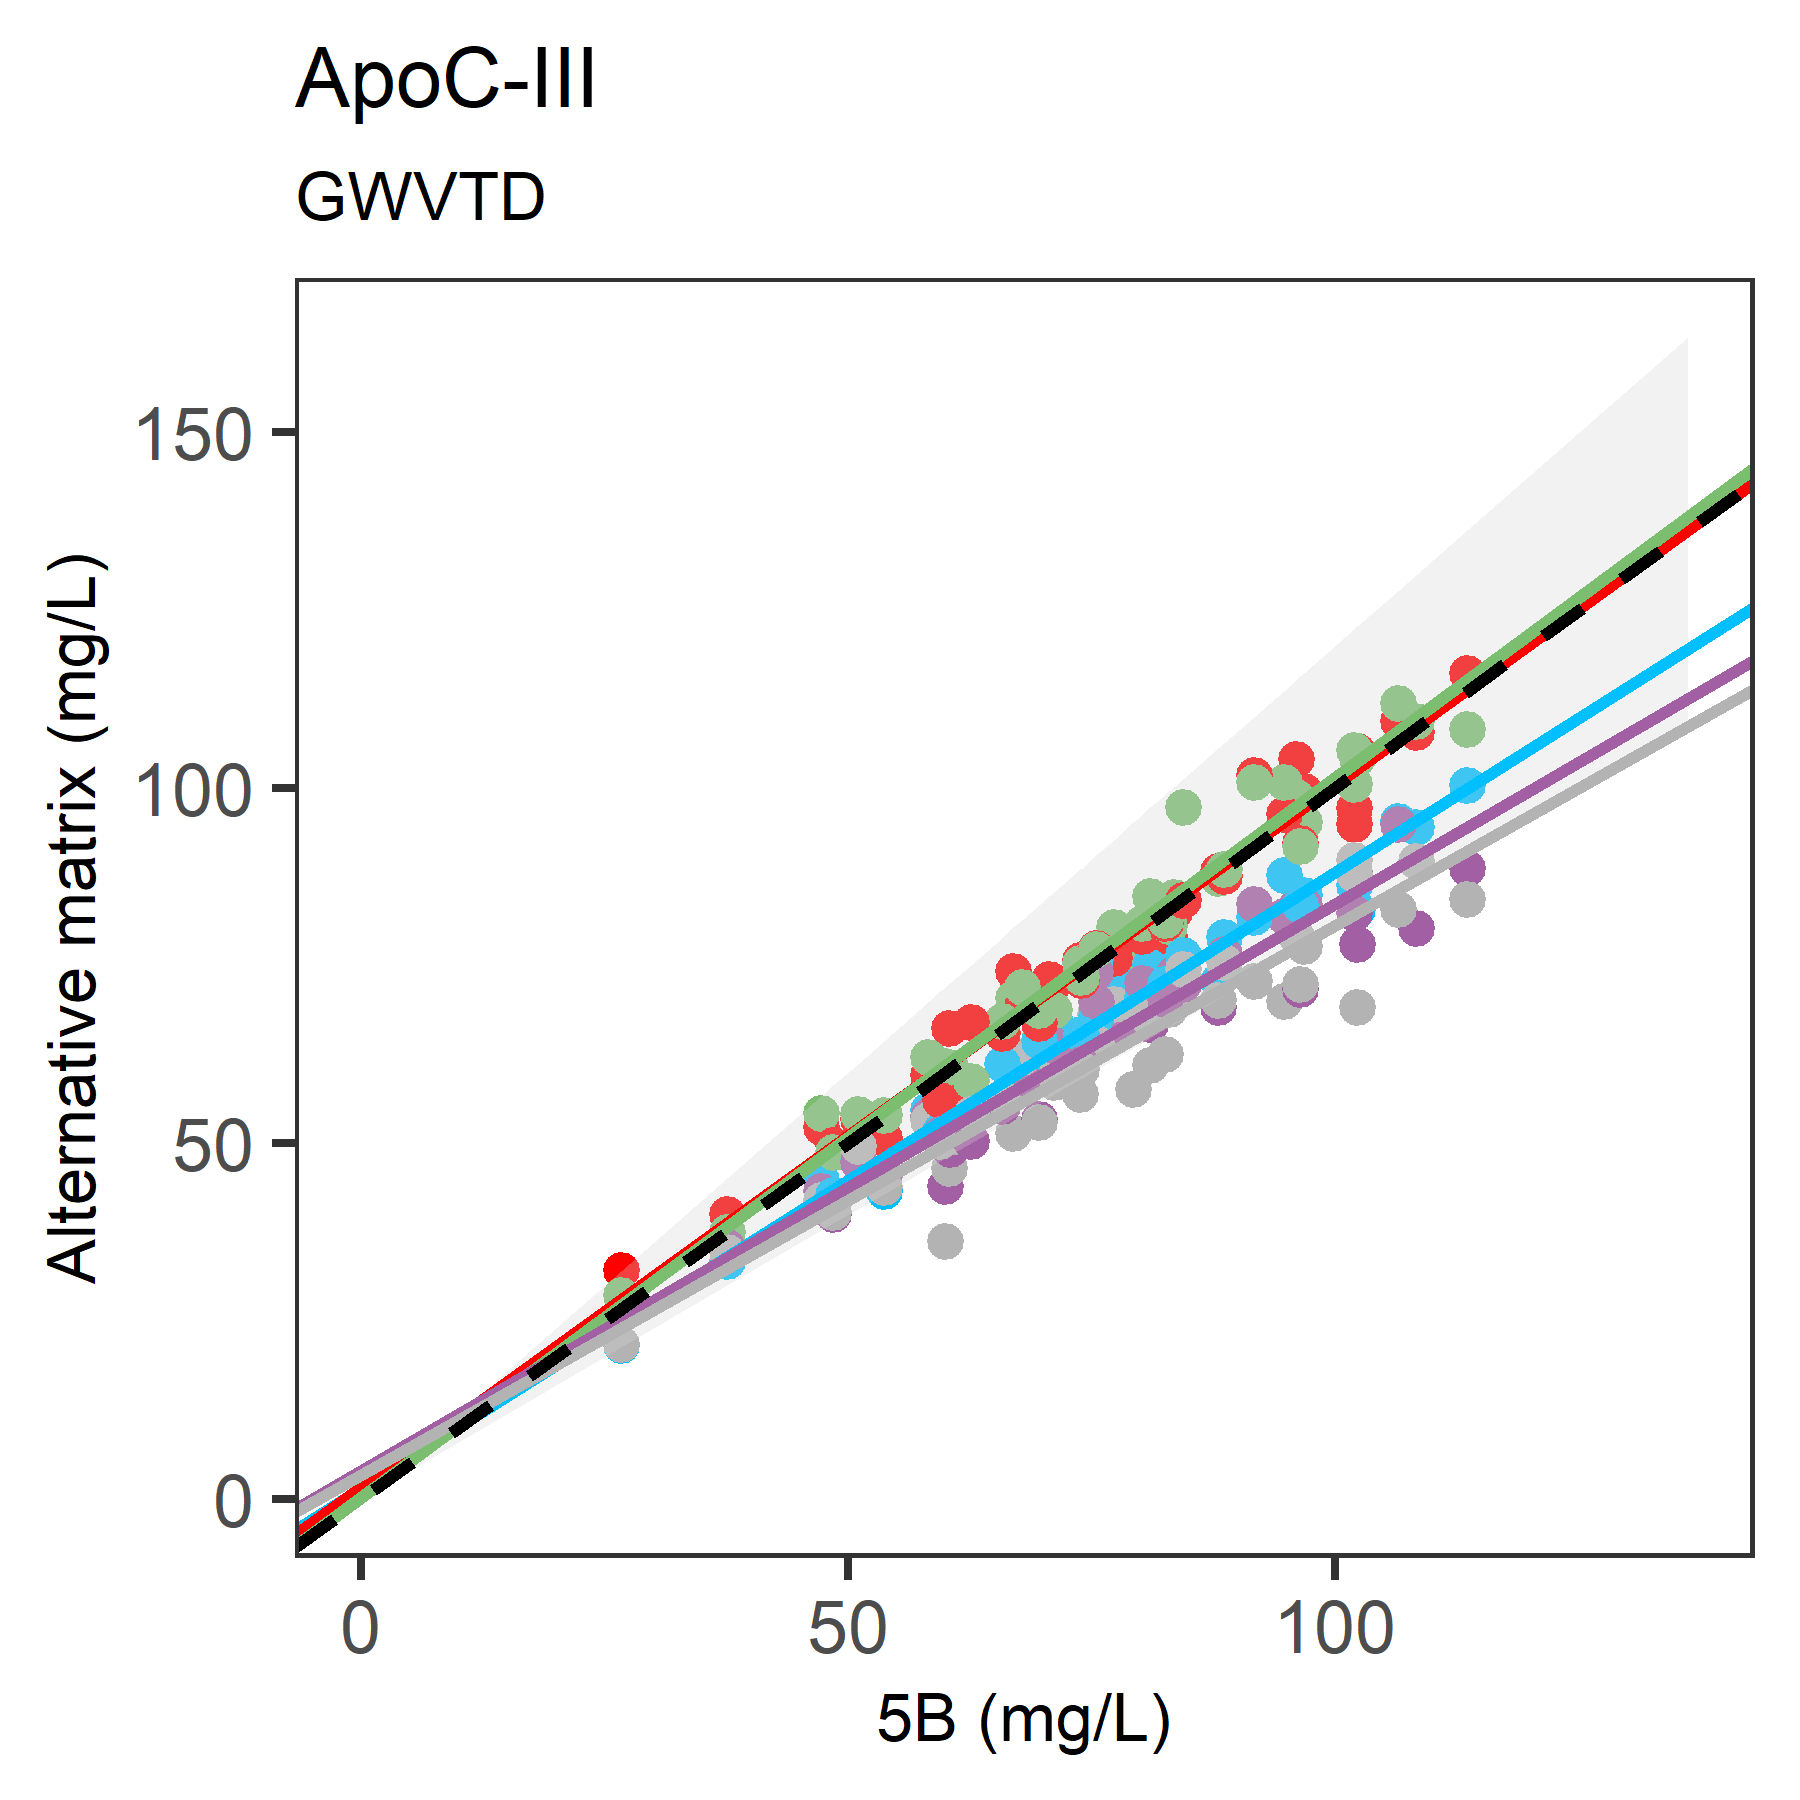

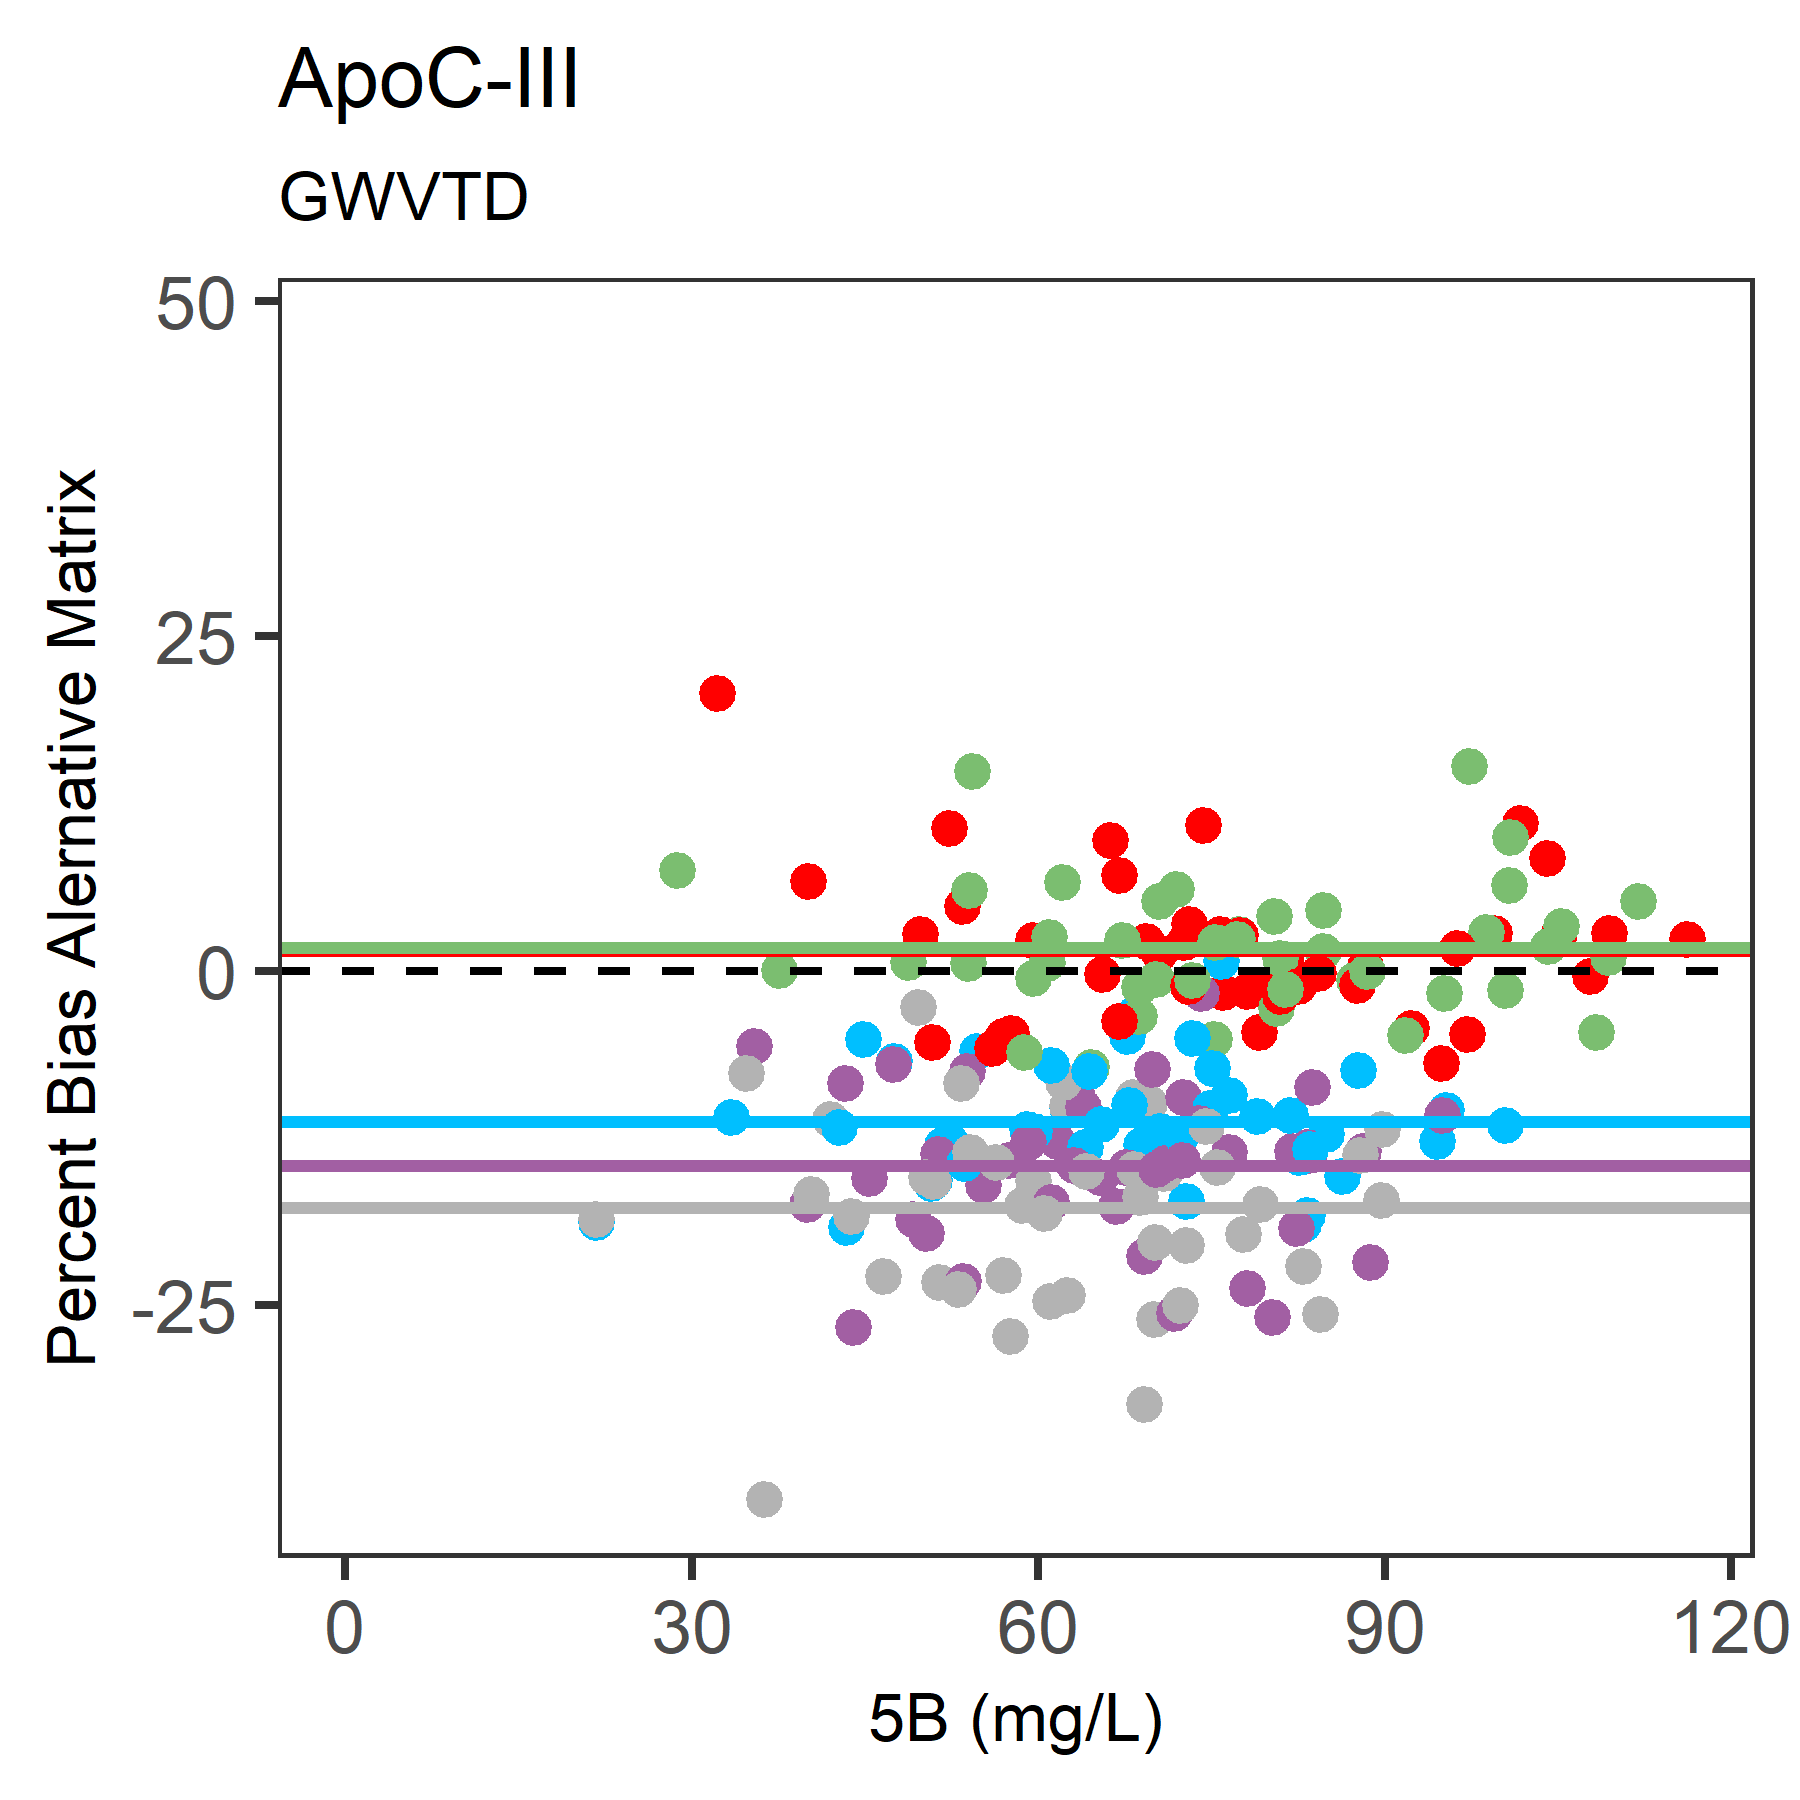

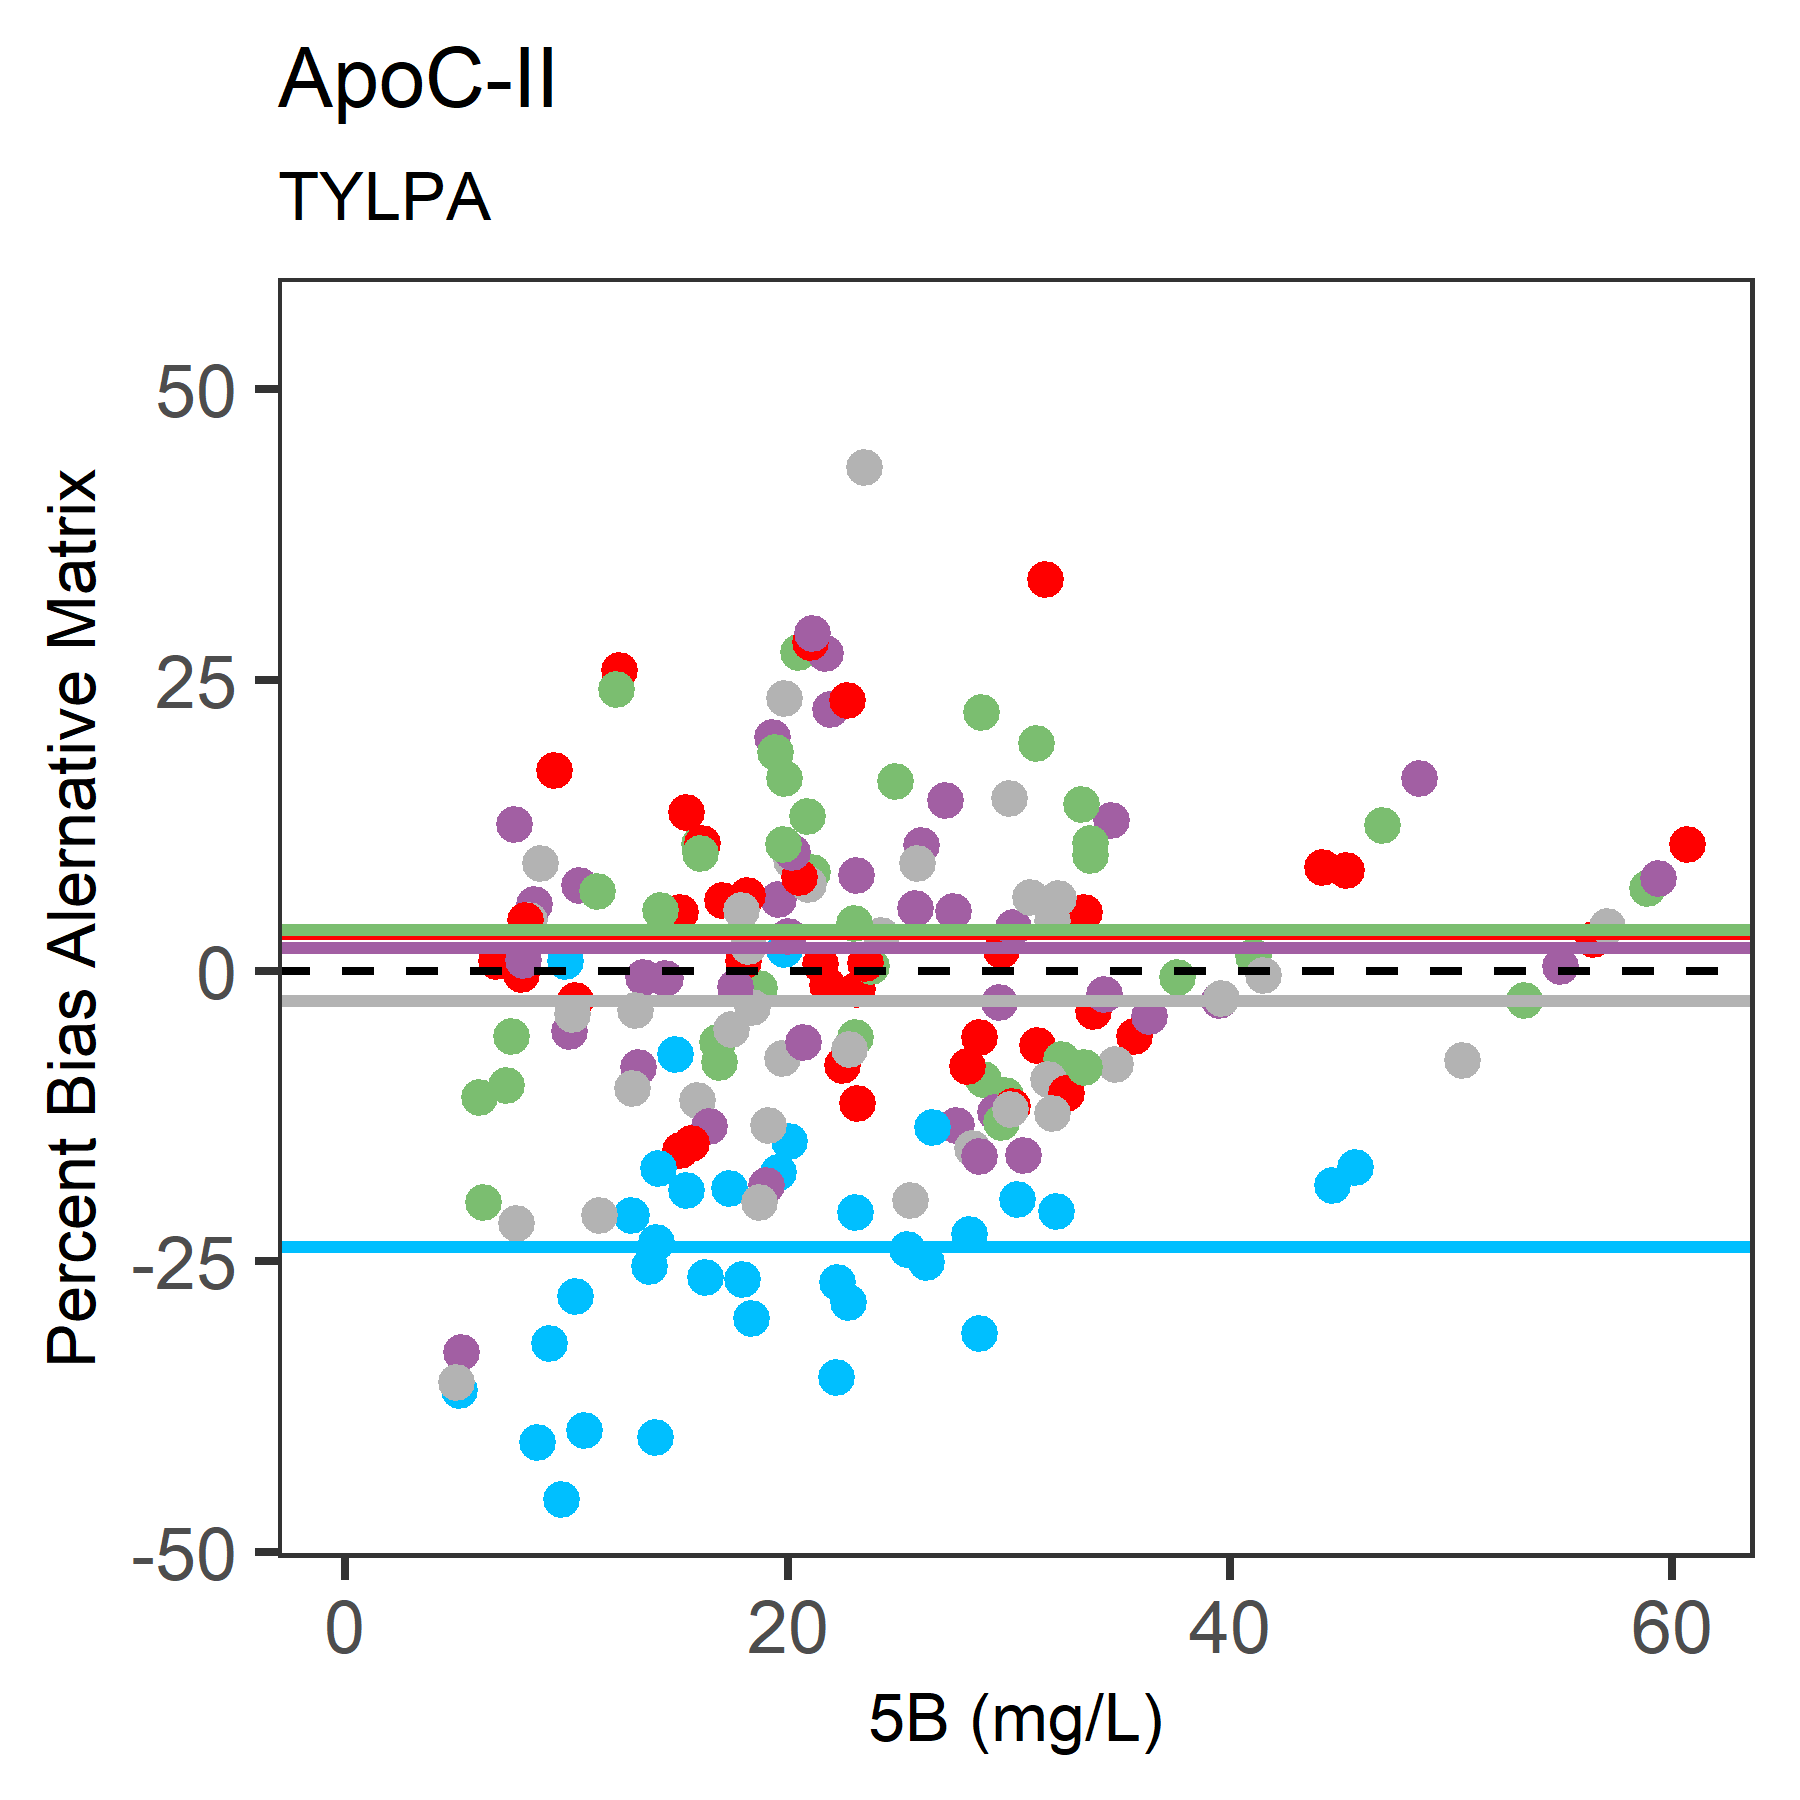

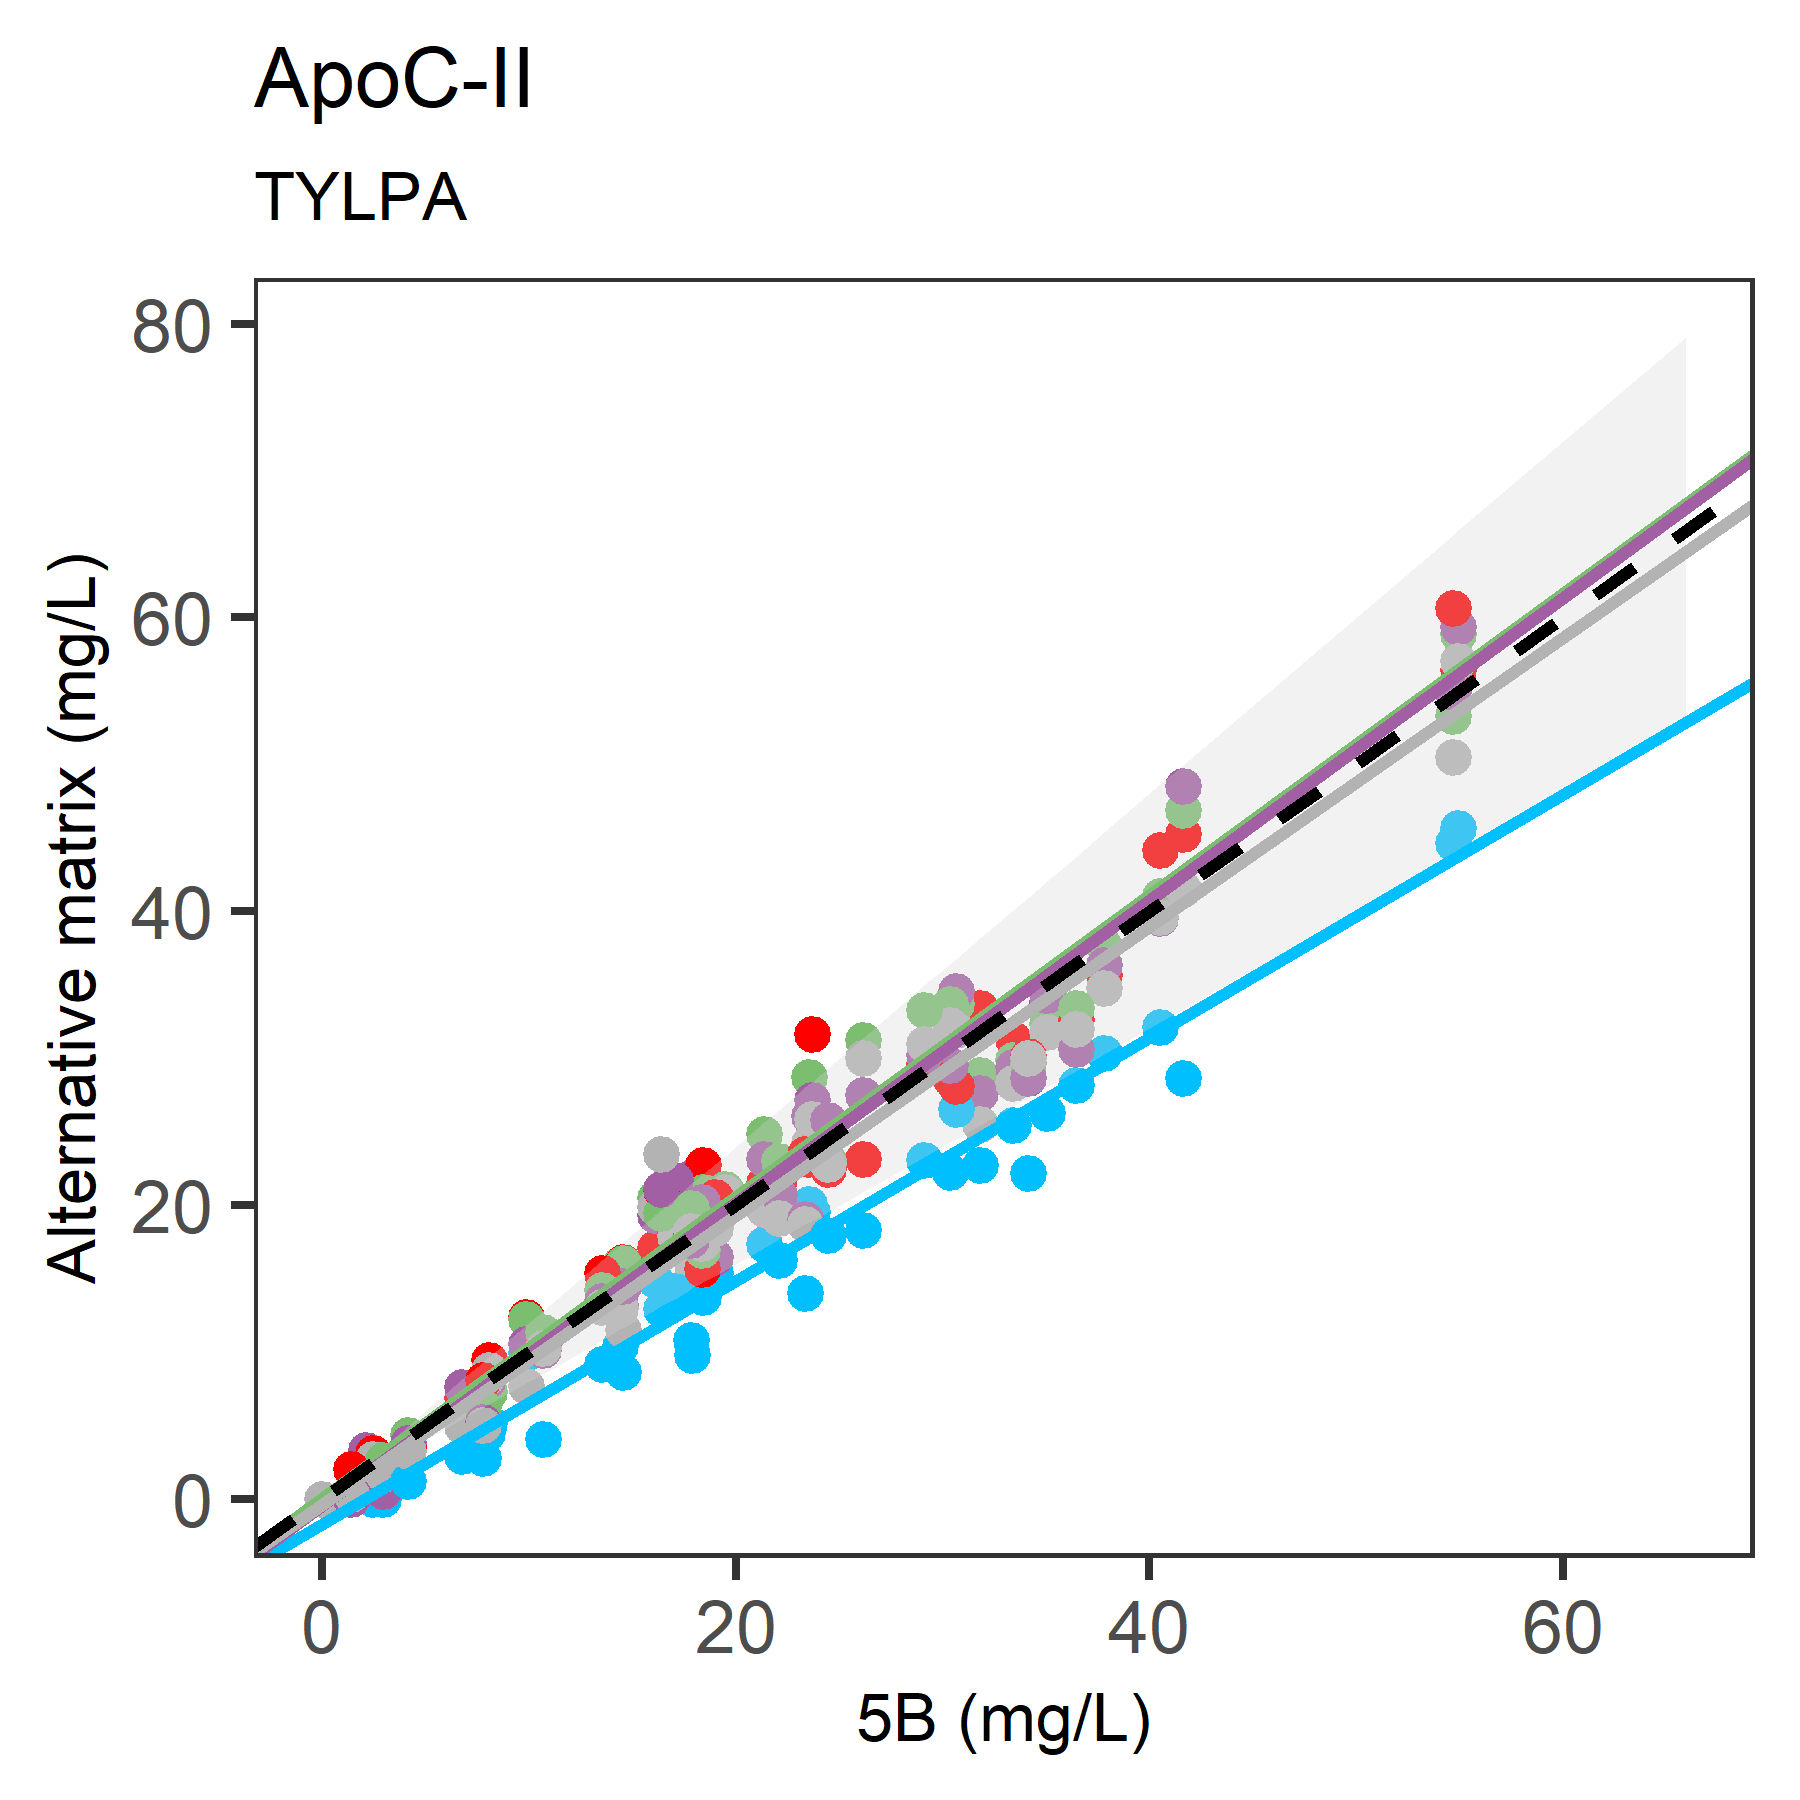

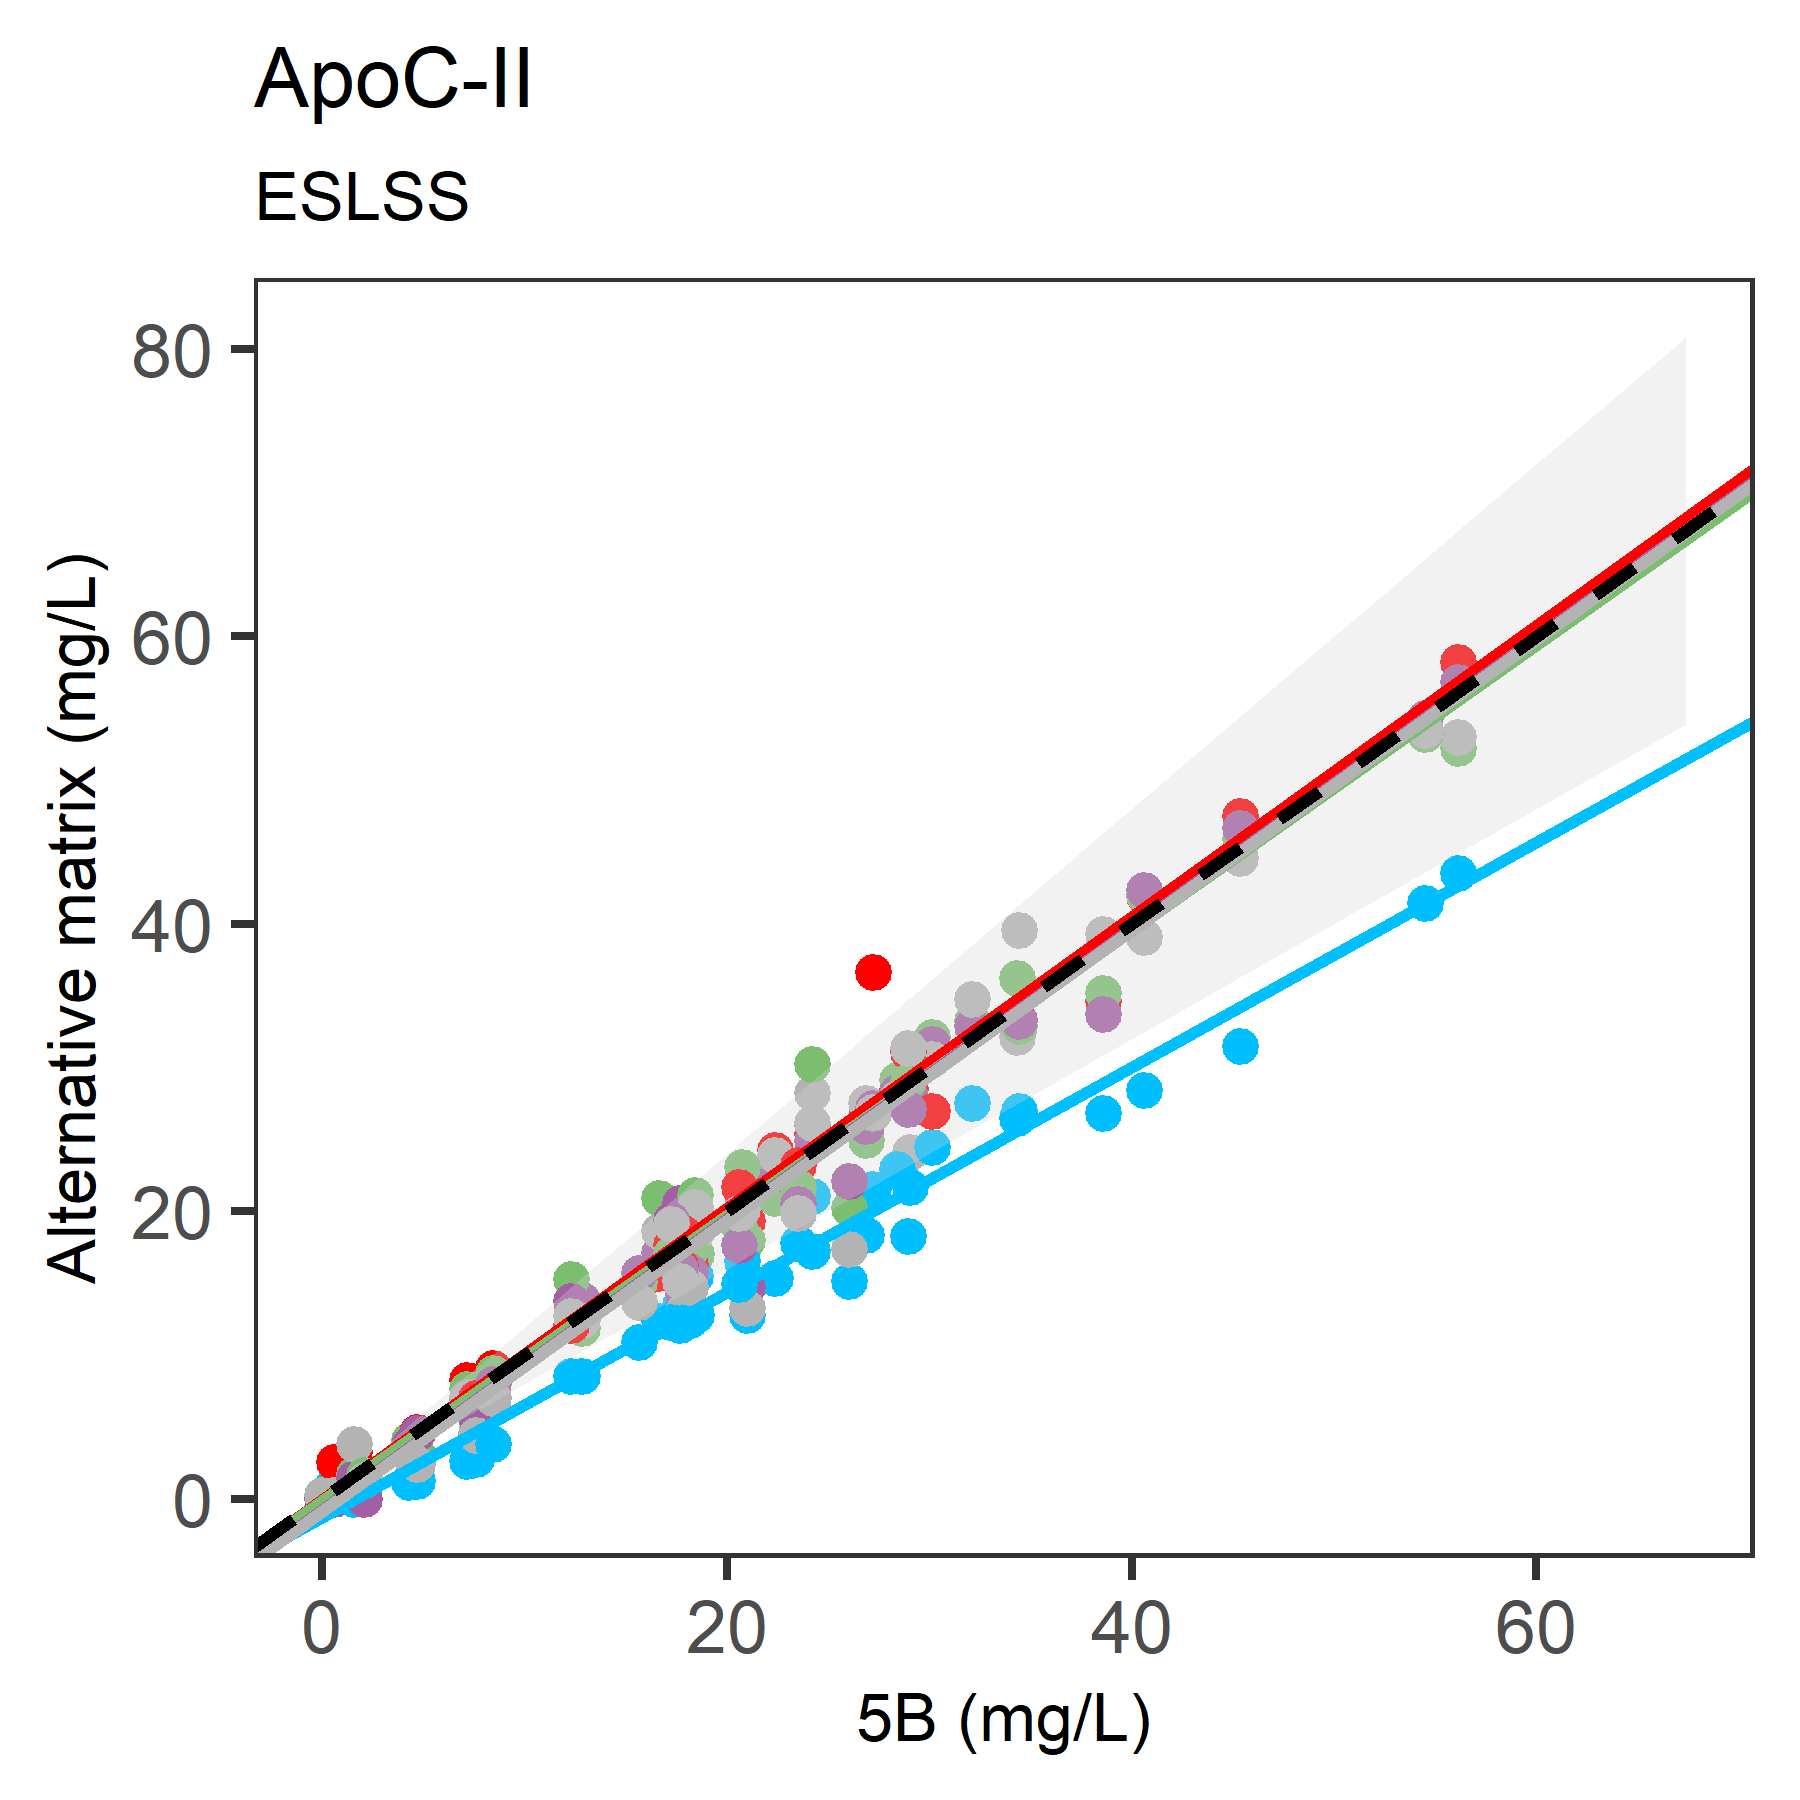

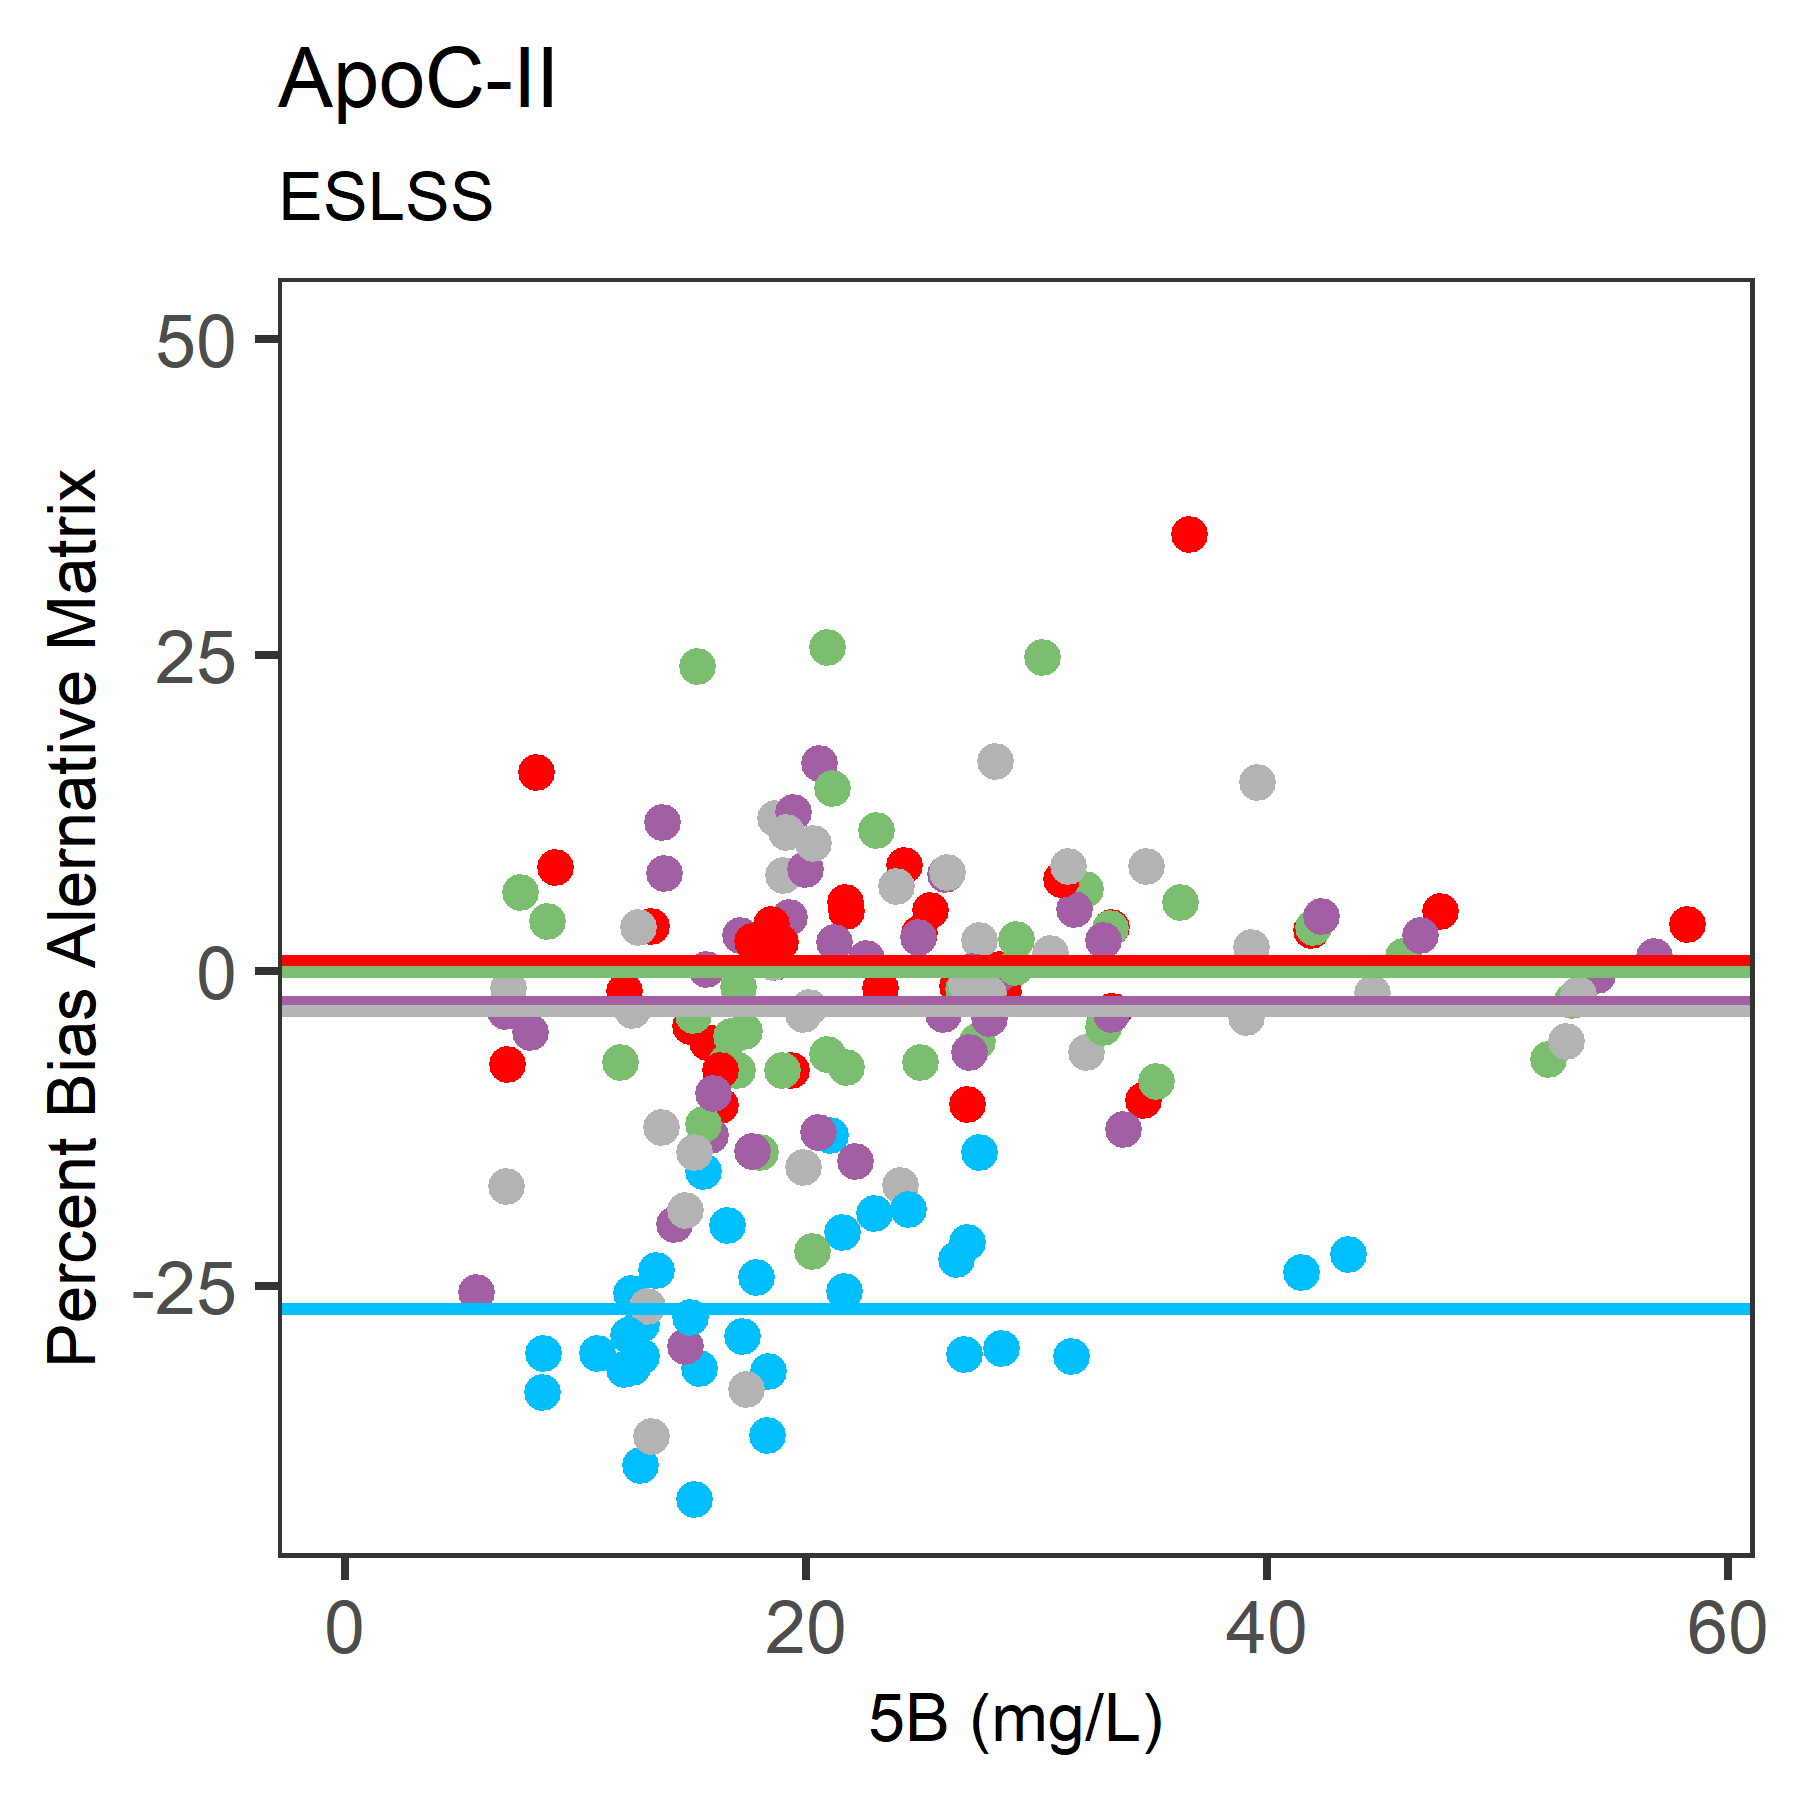

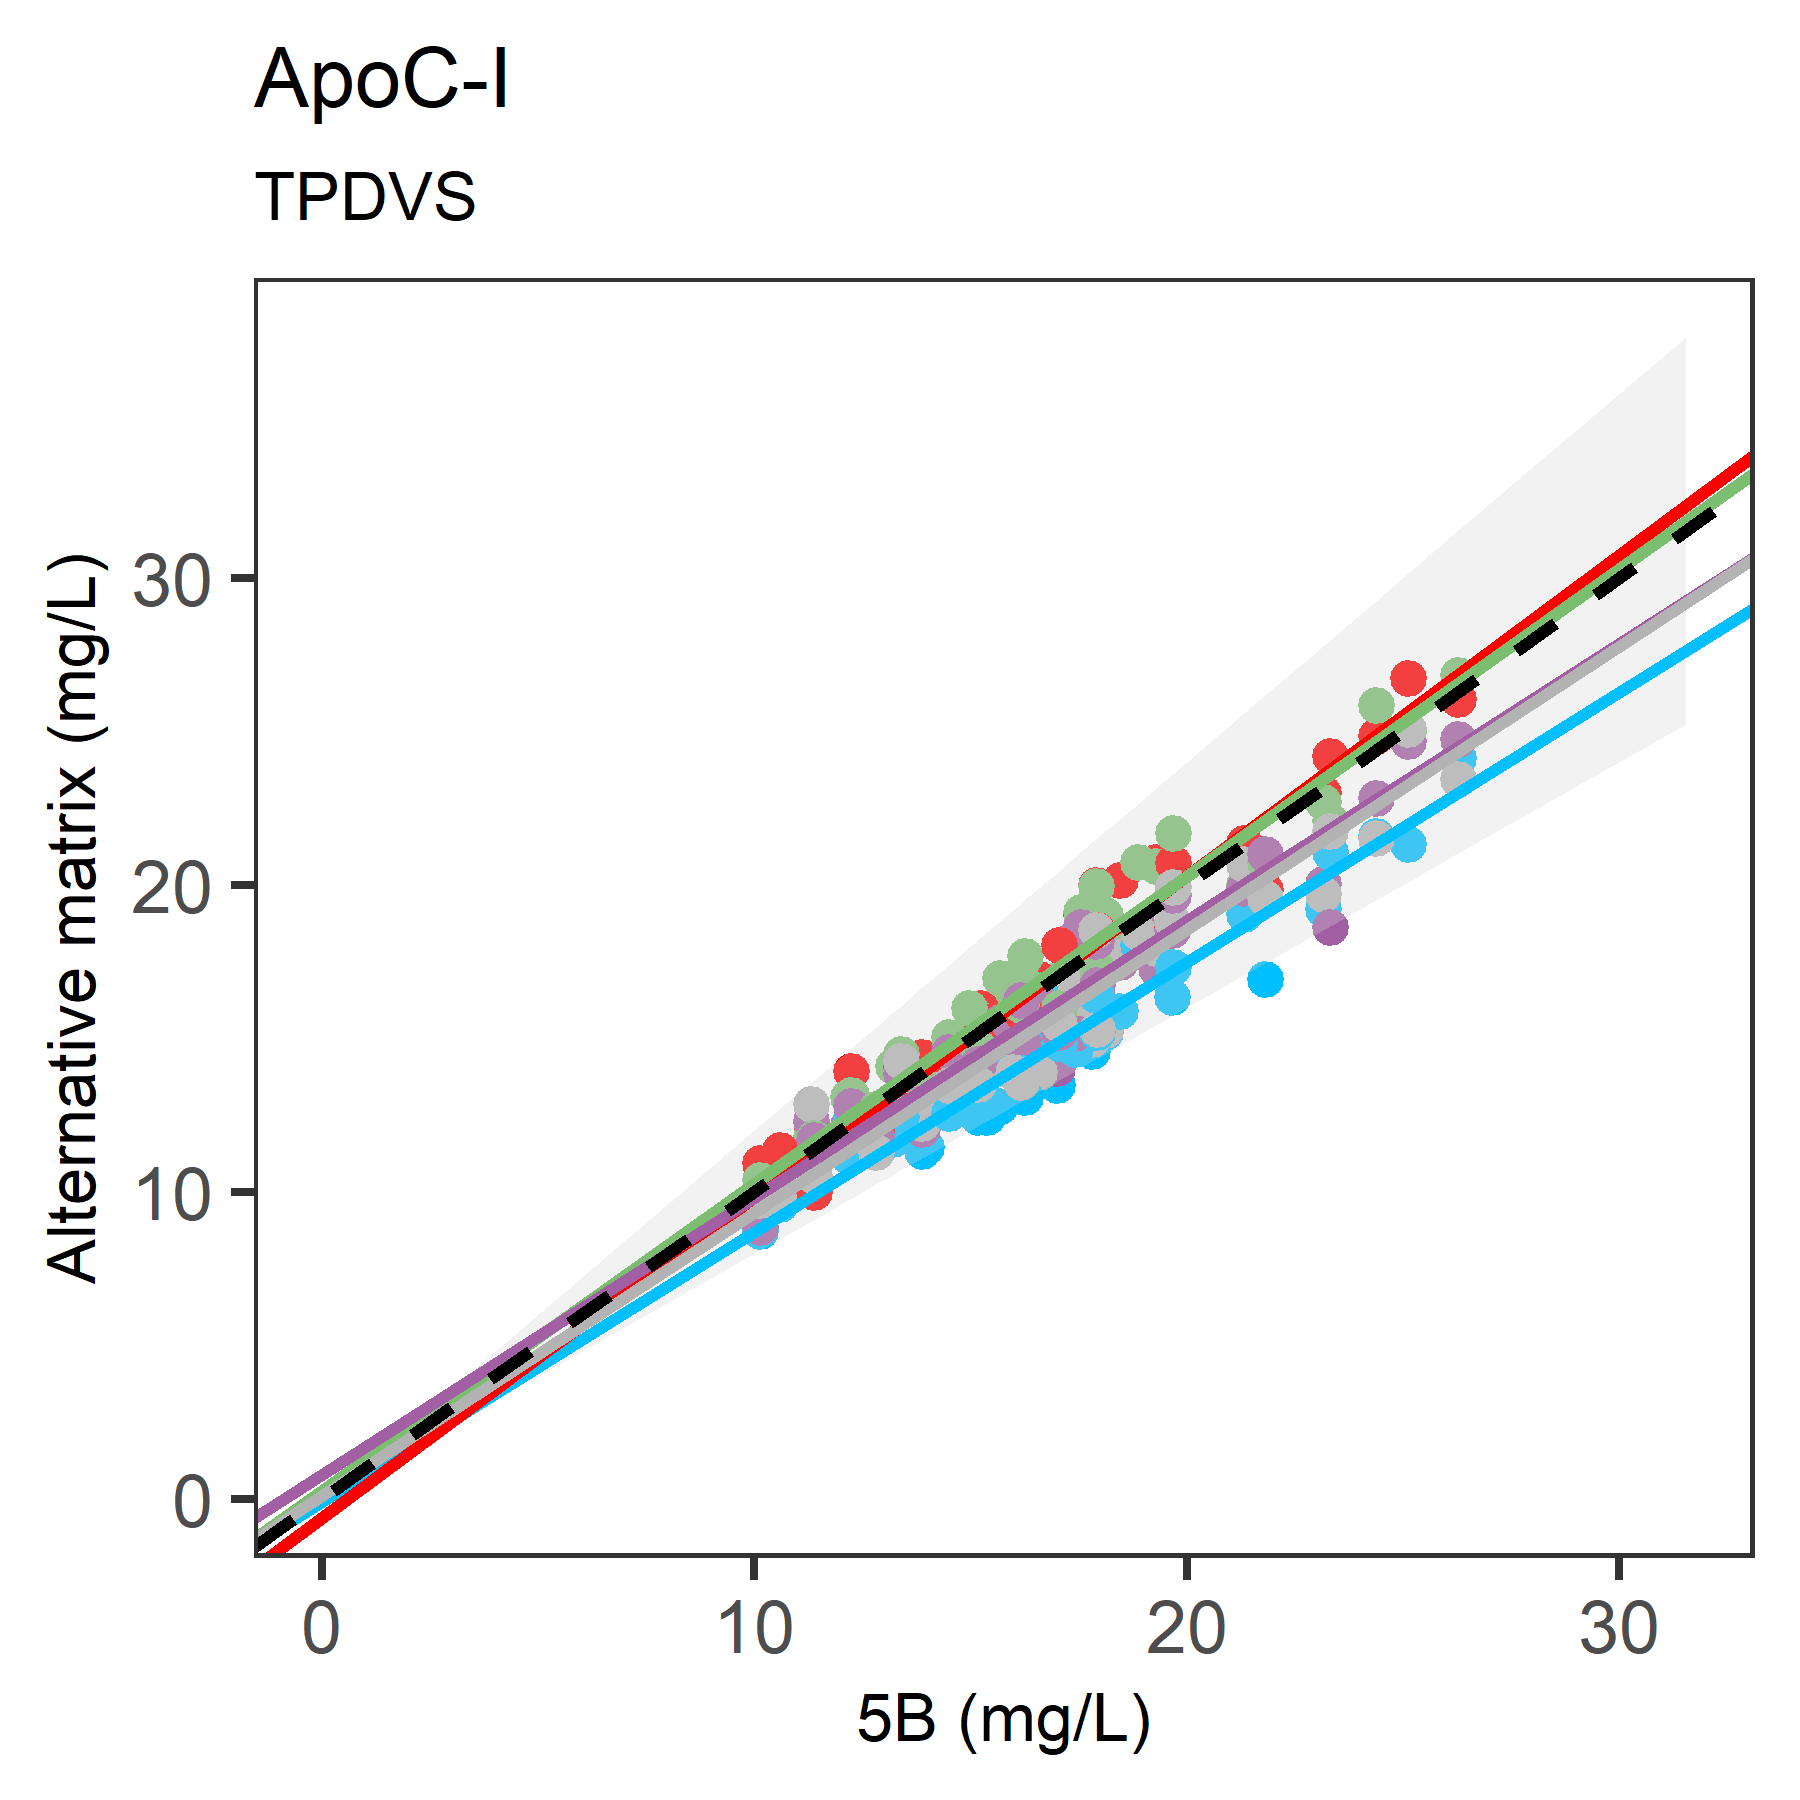

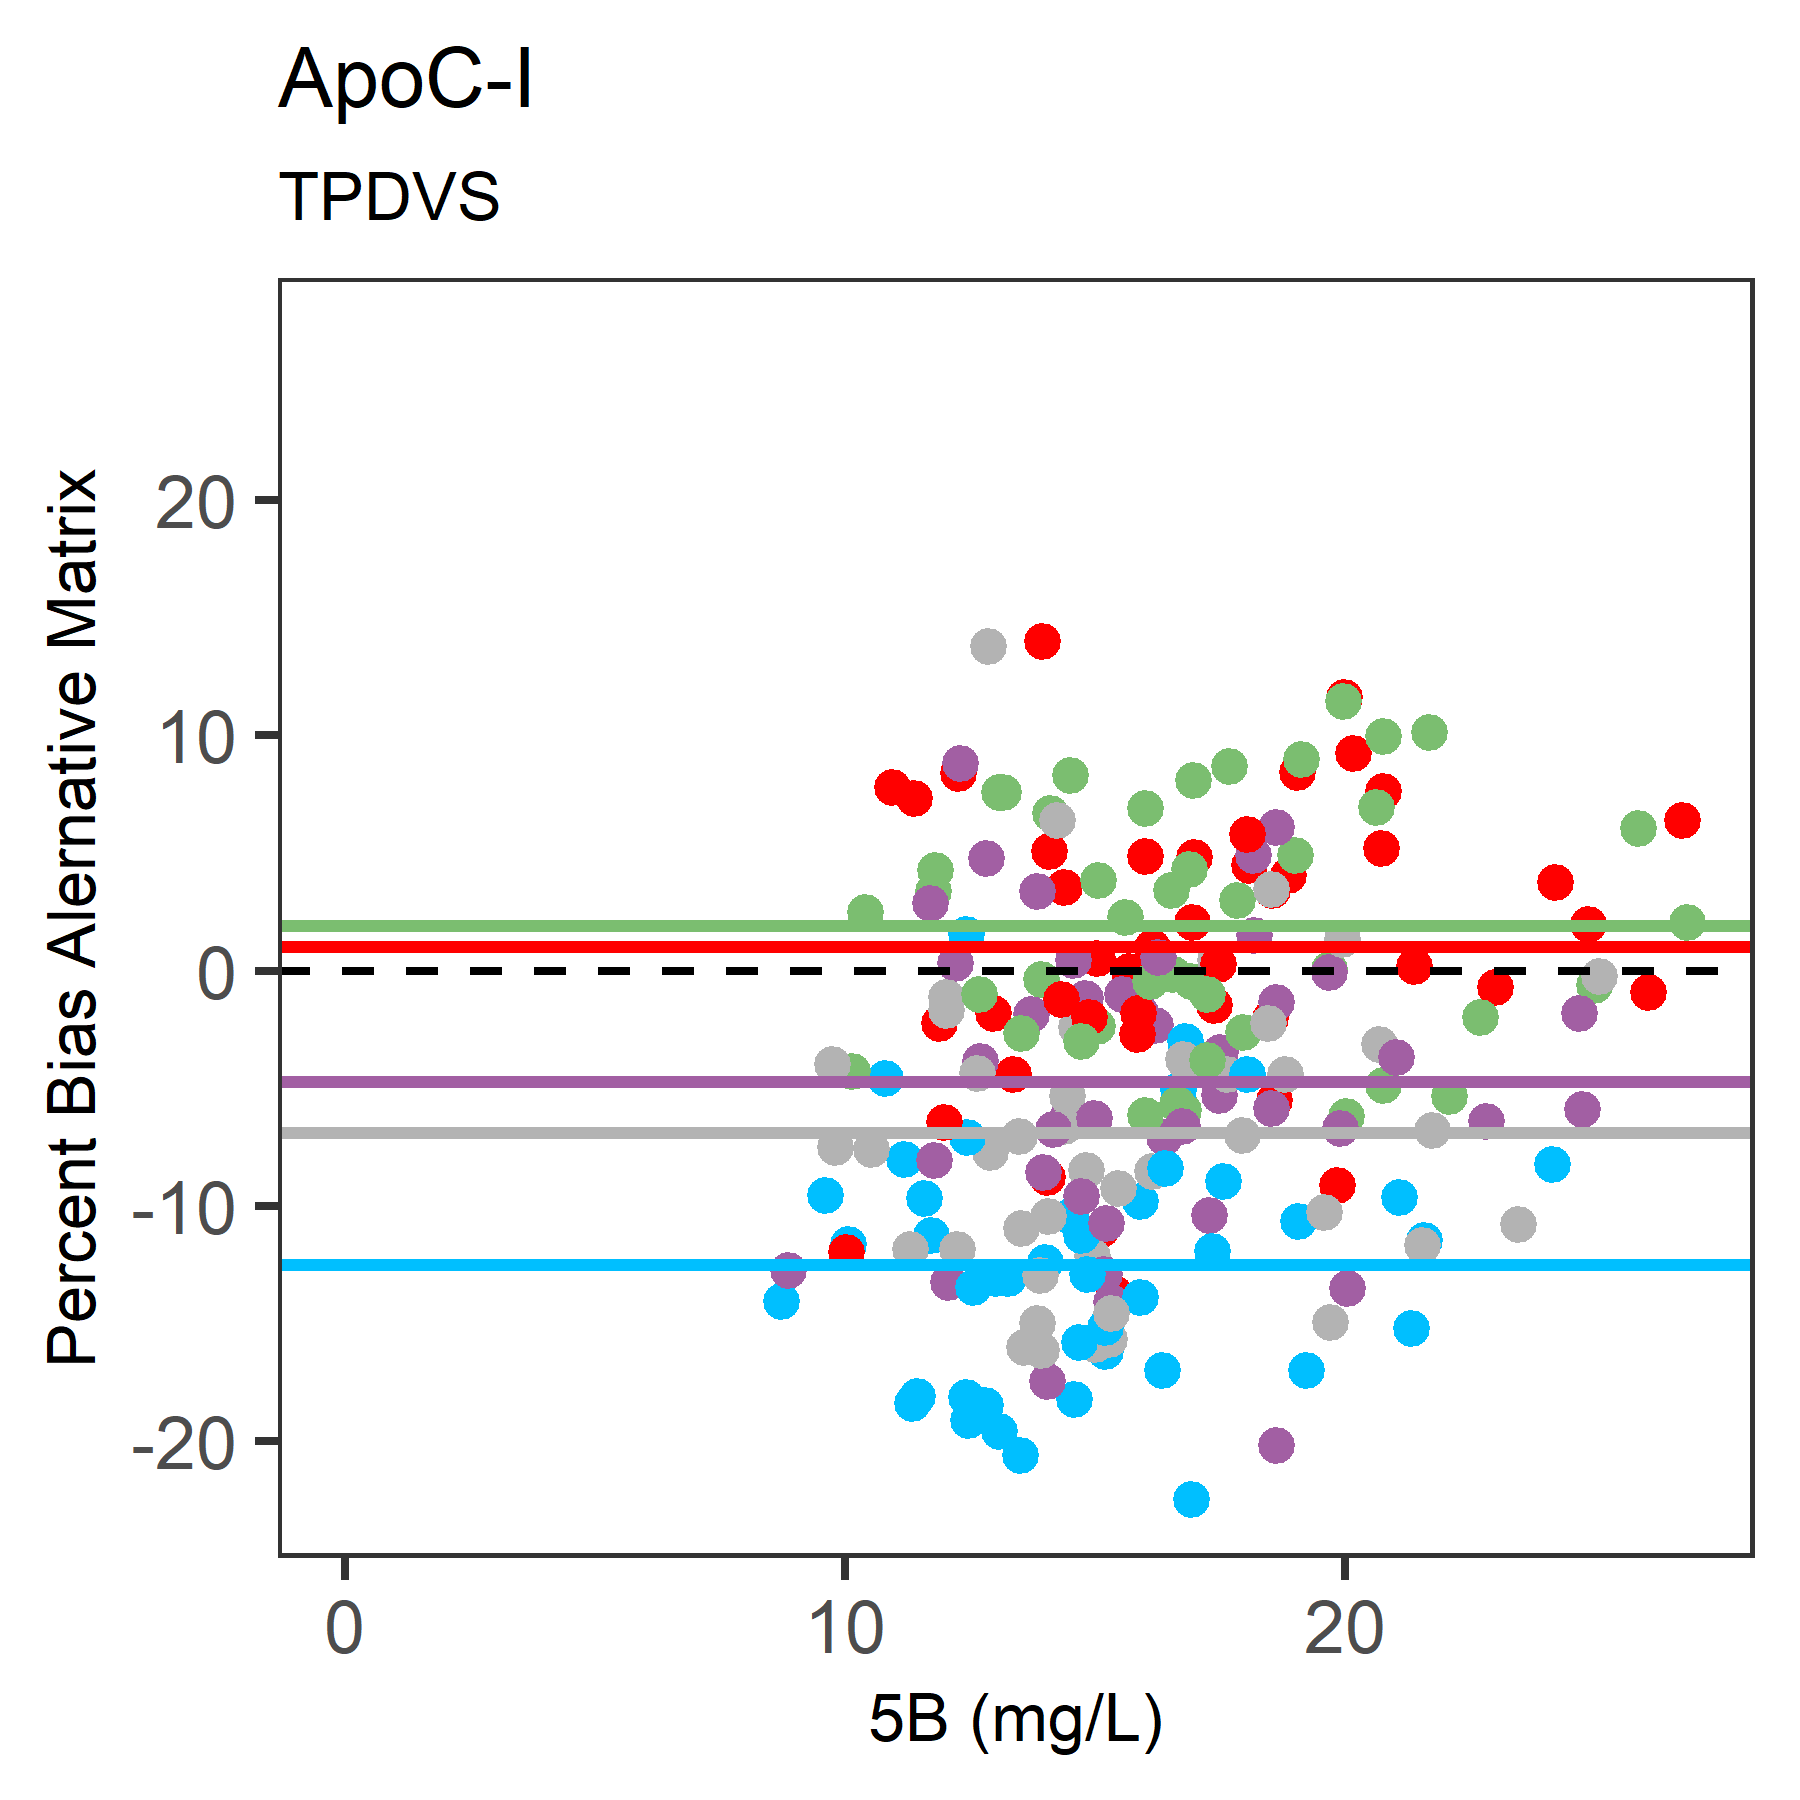

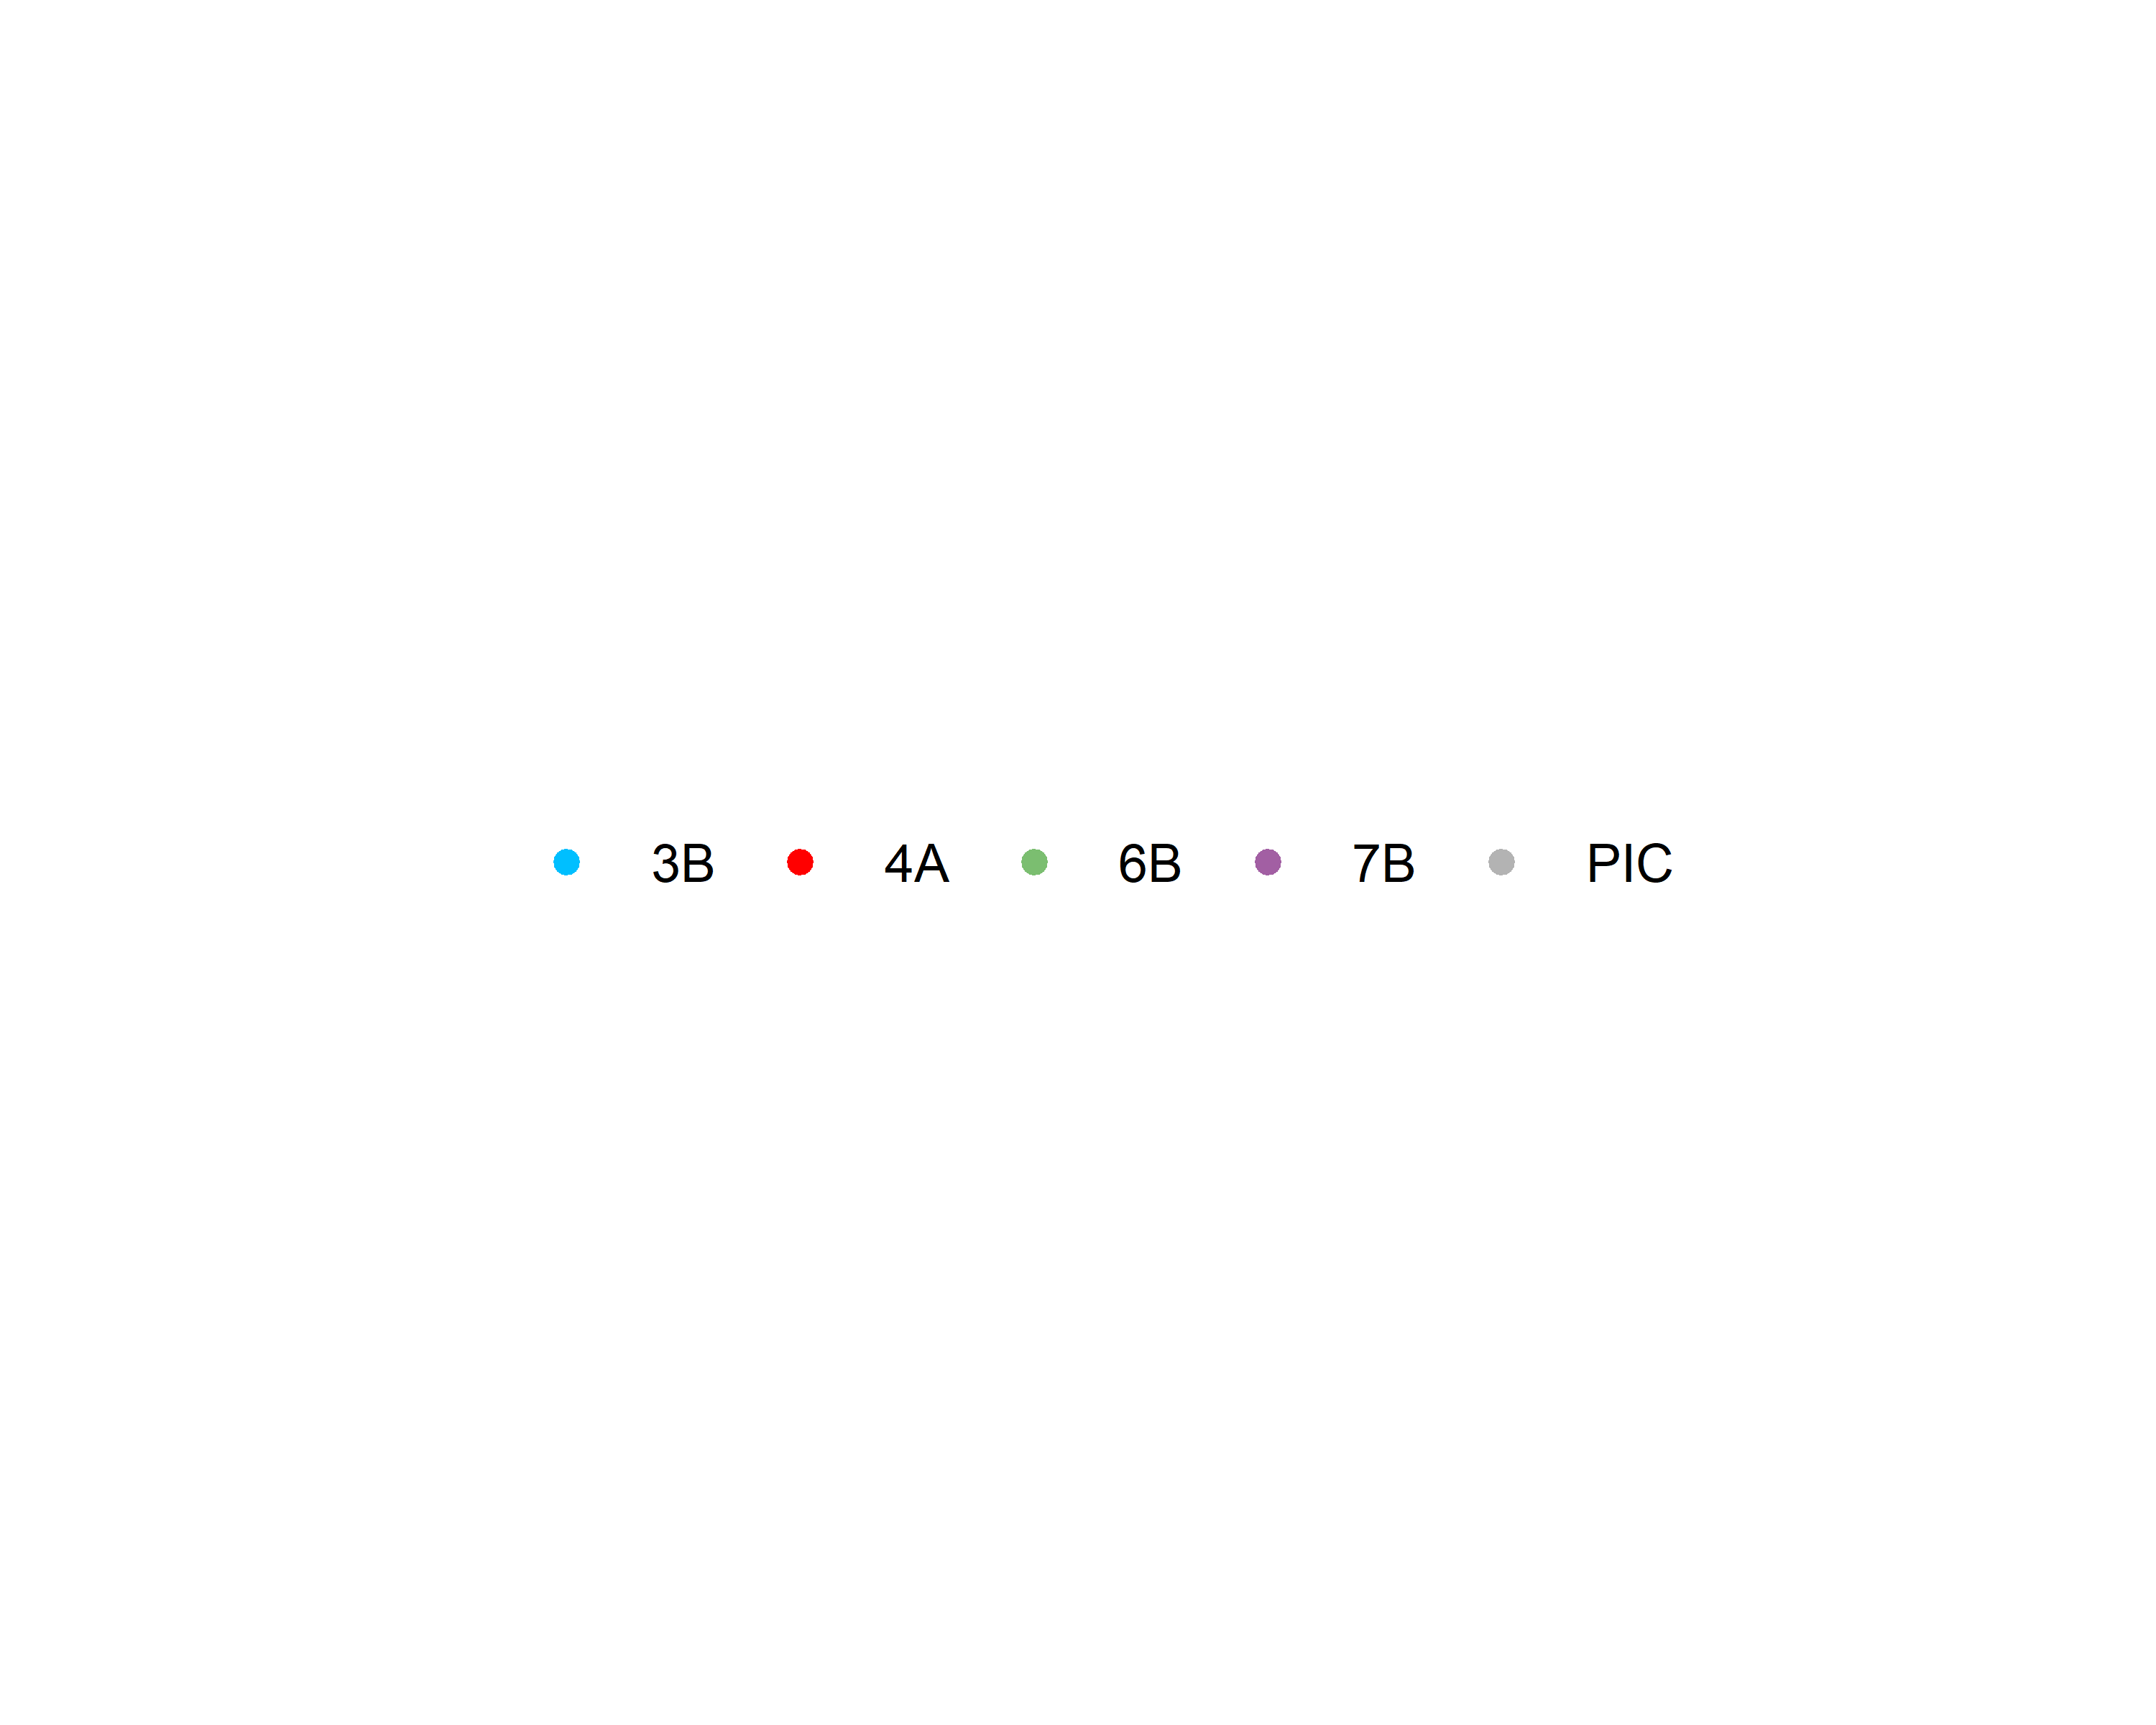


S1(A)


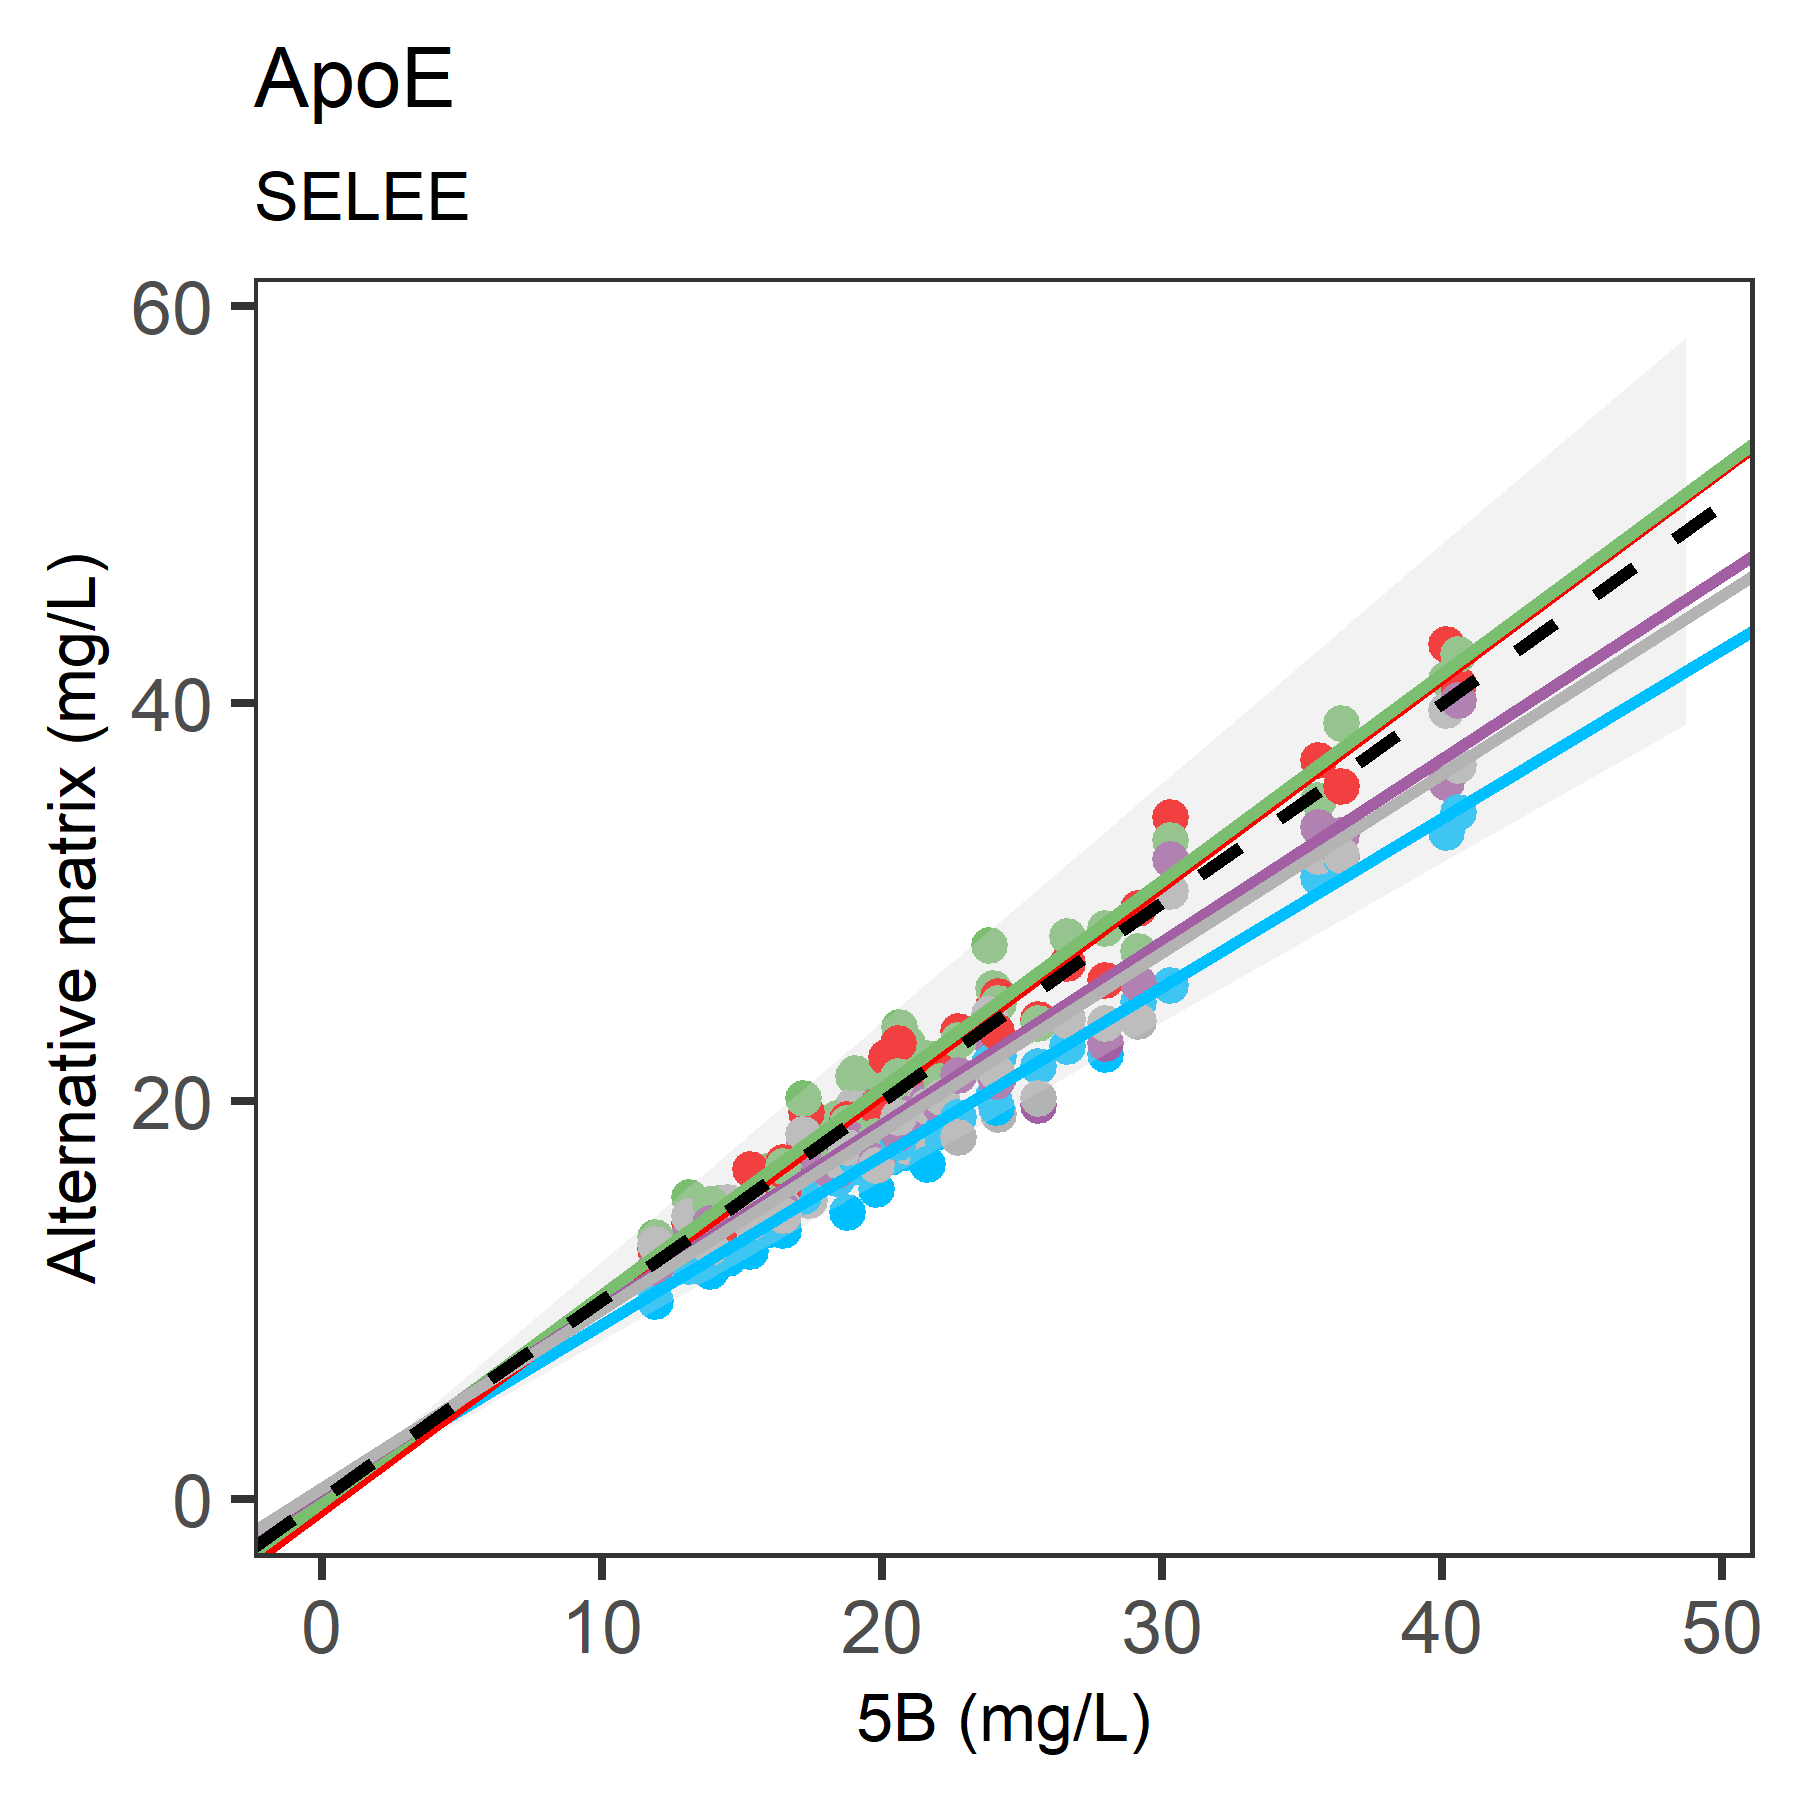

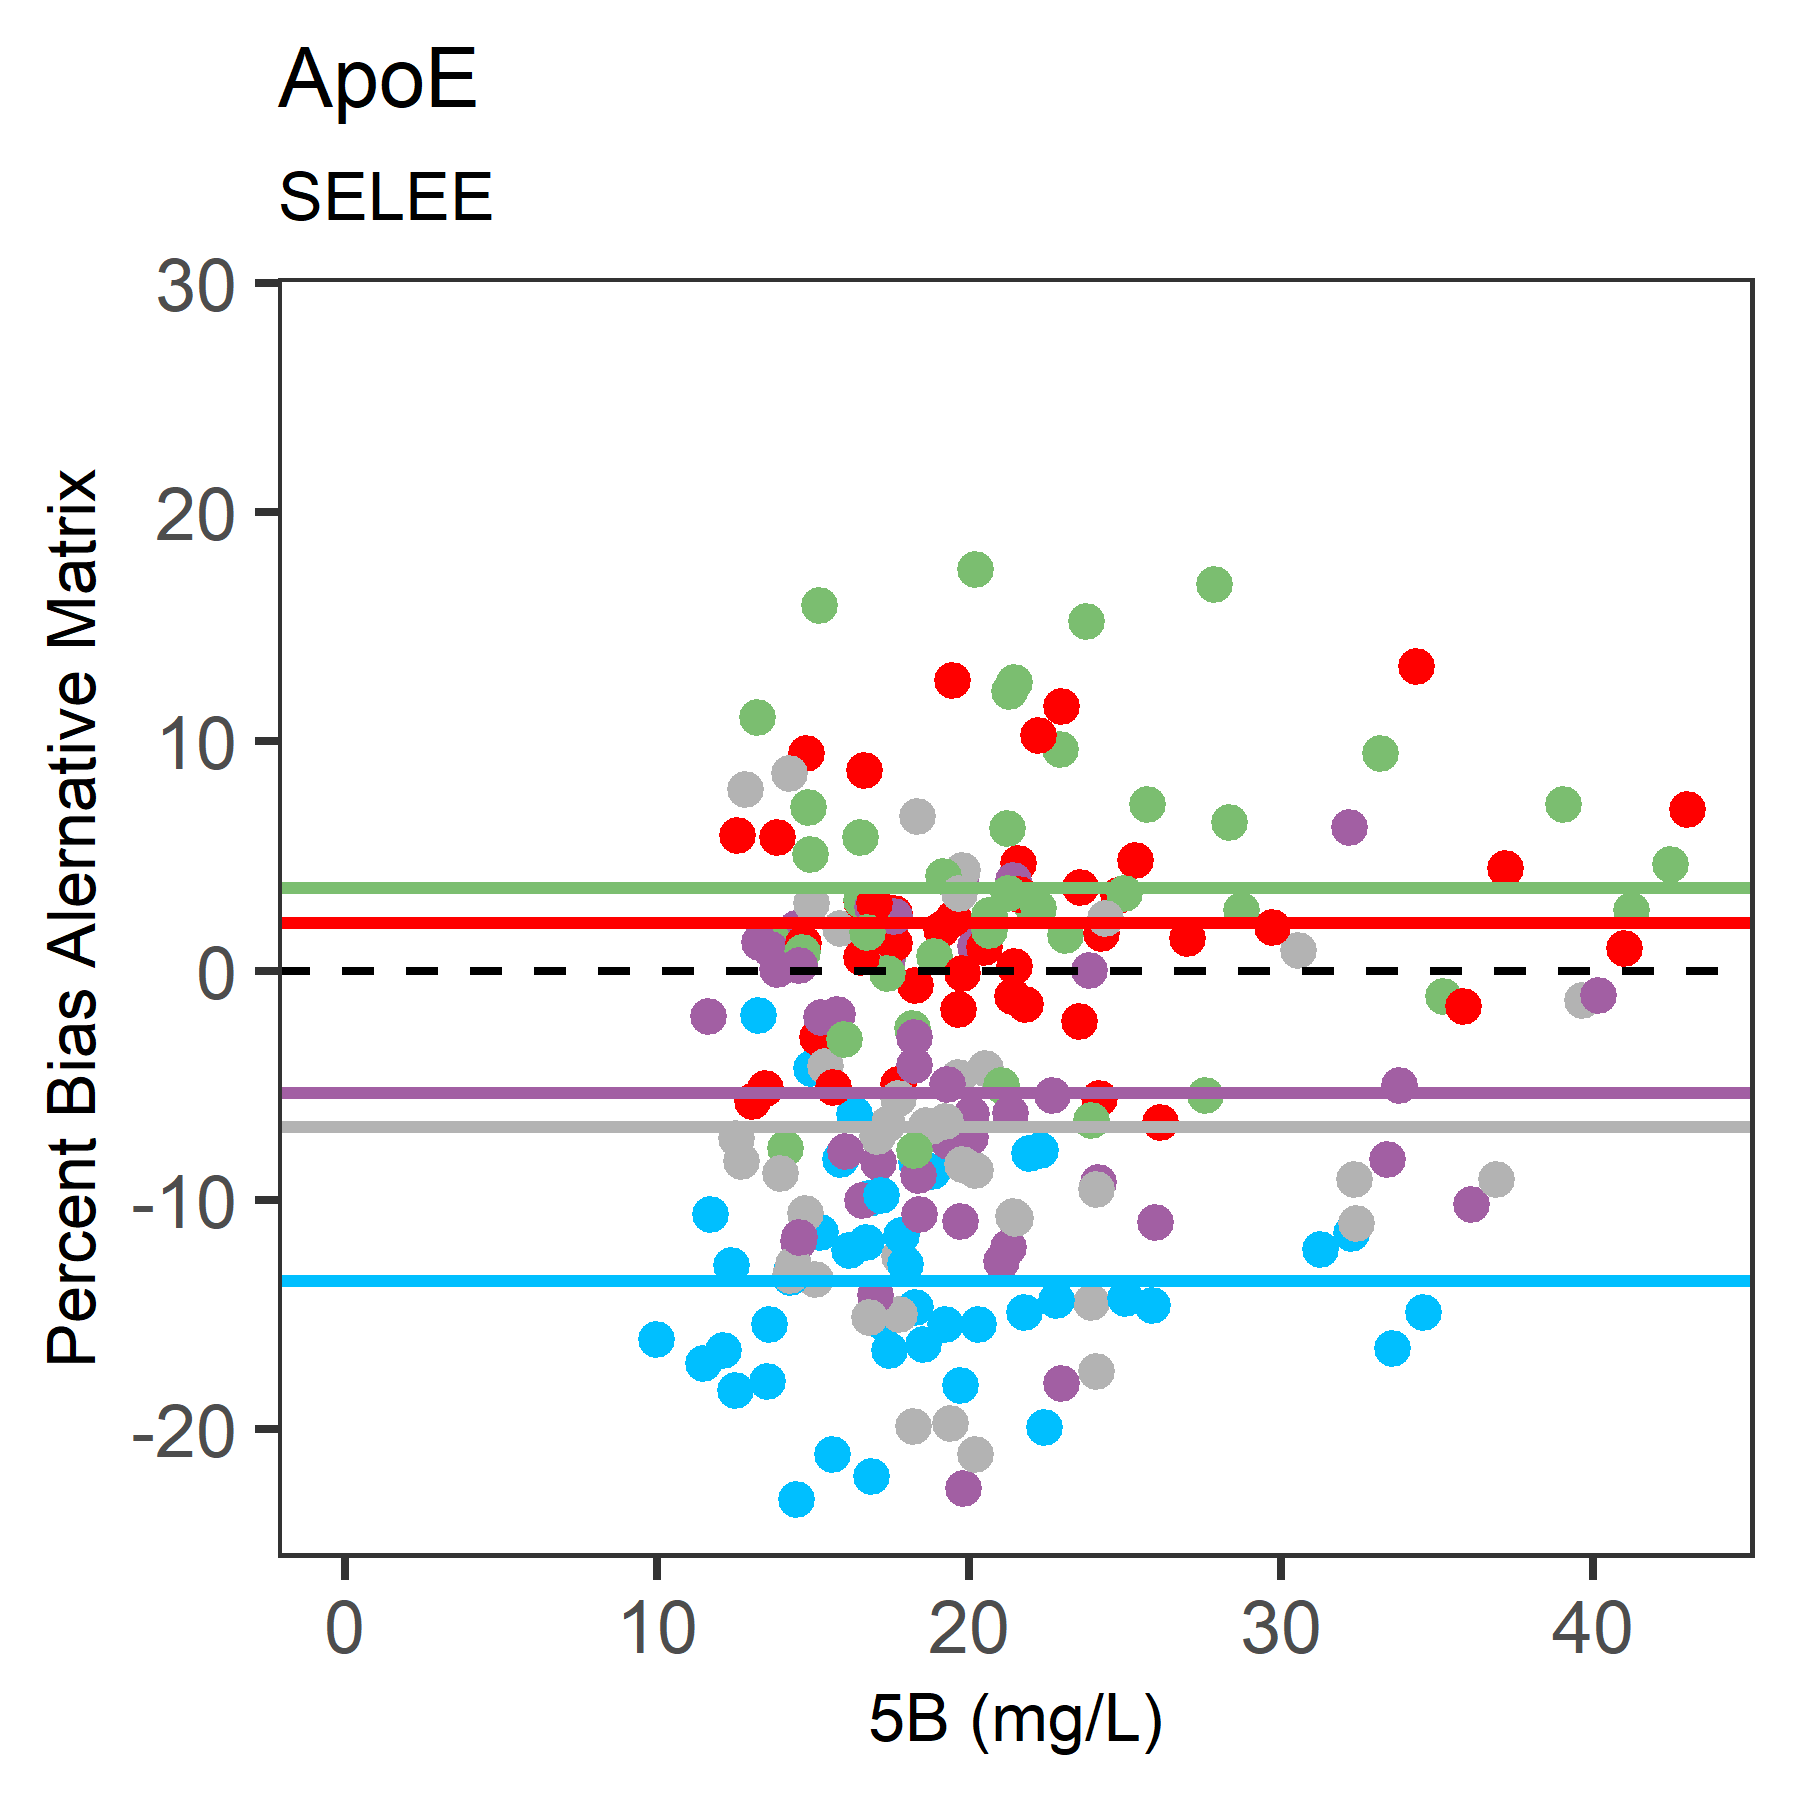

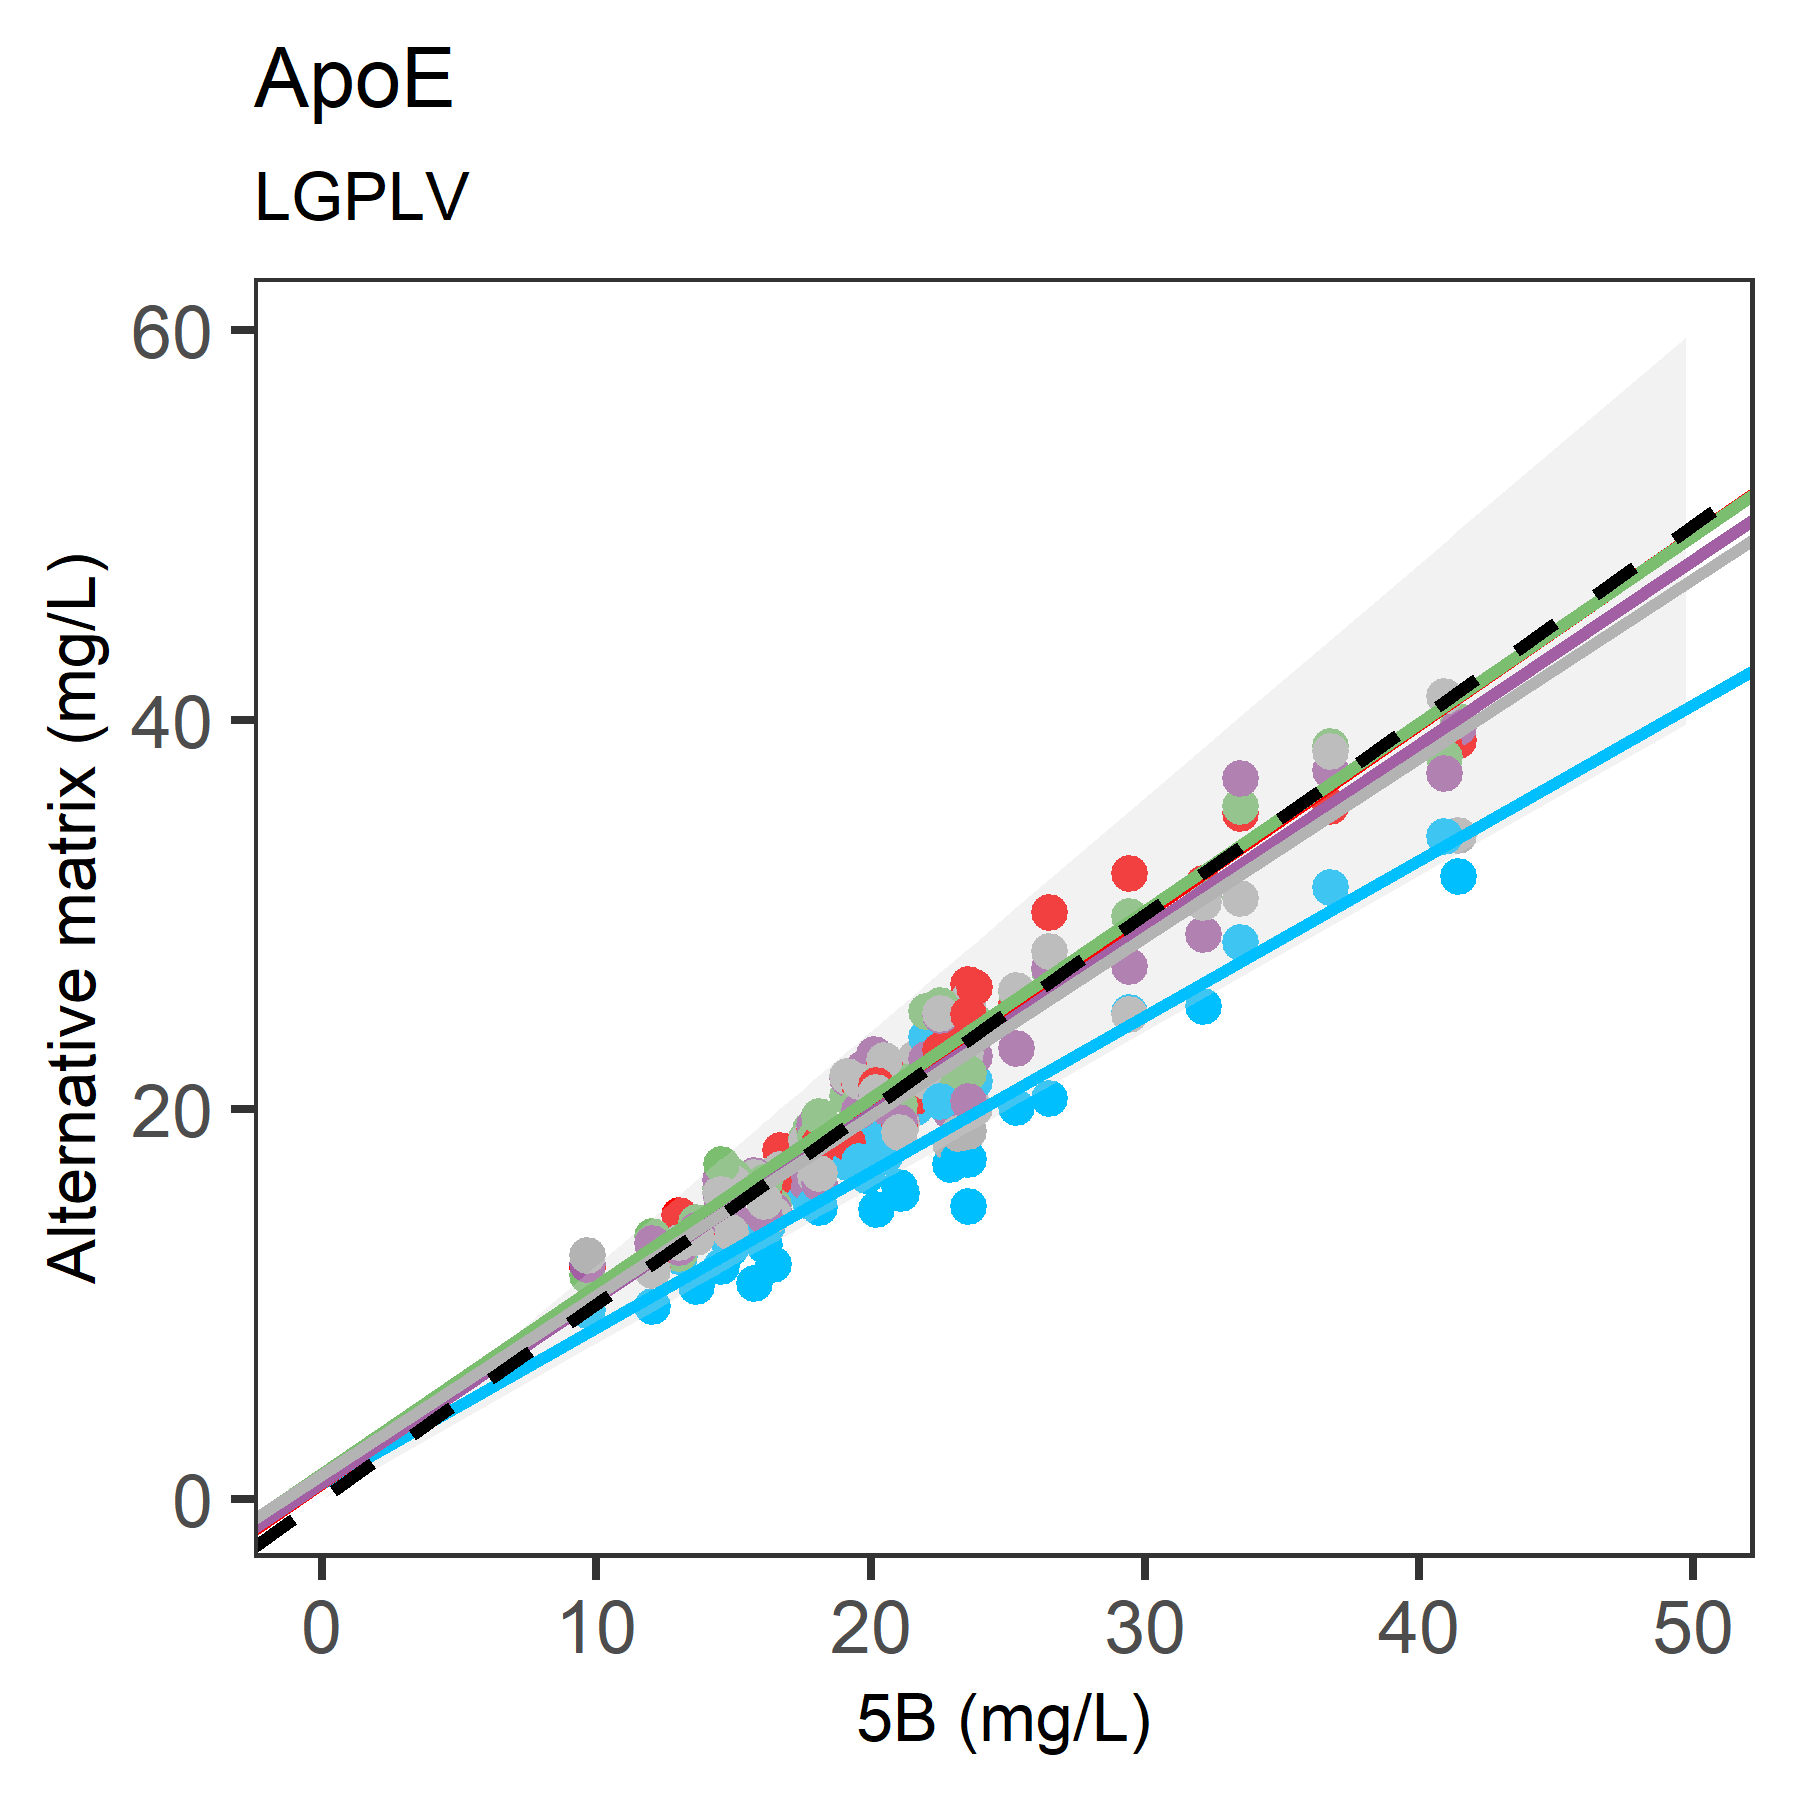

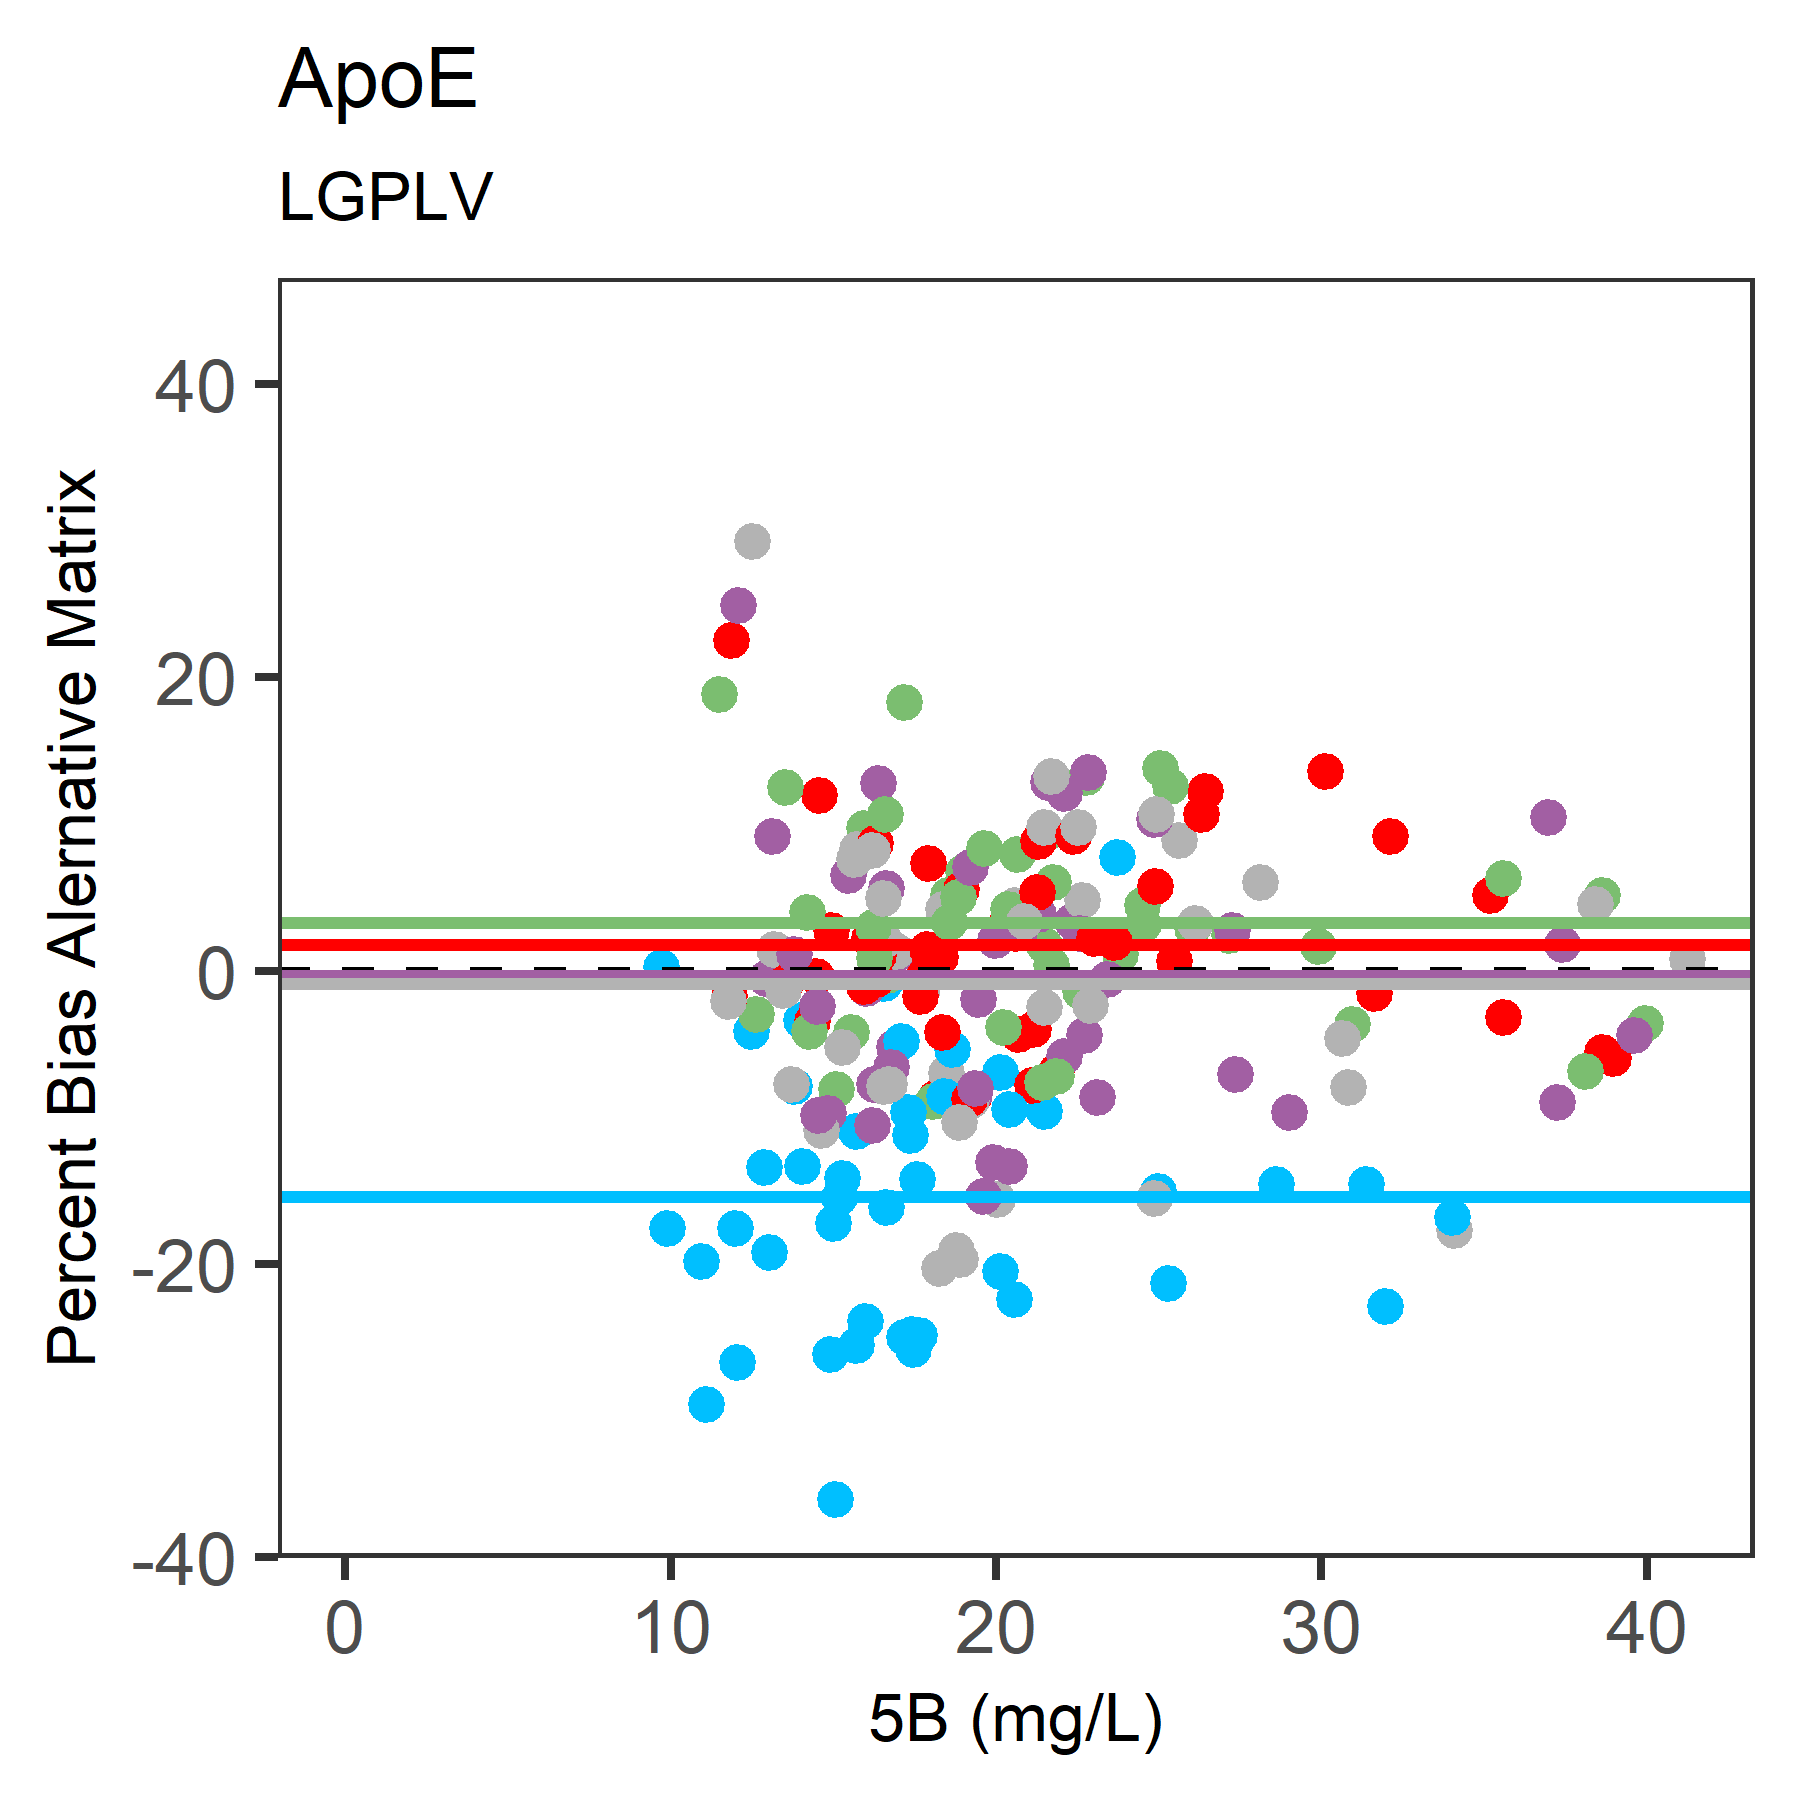

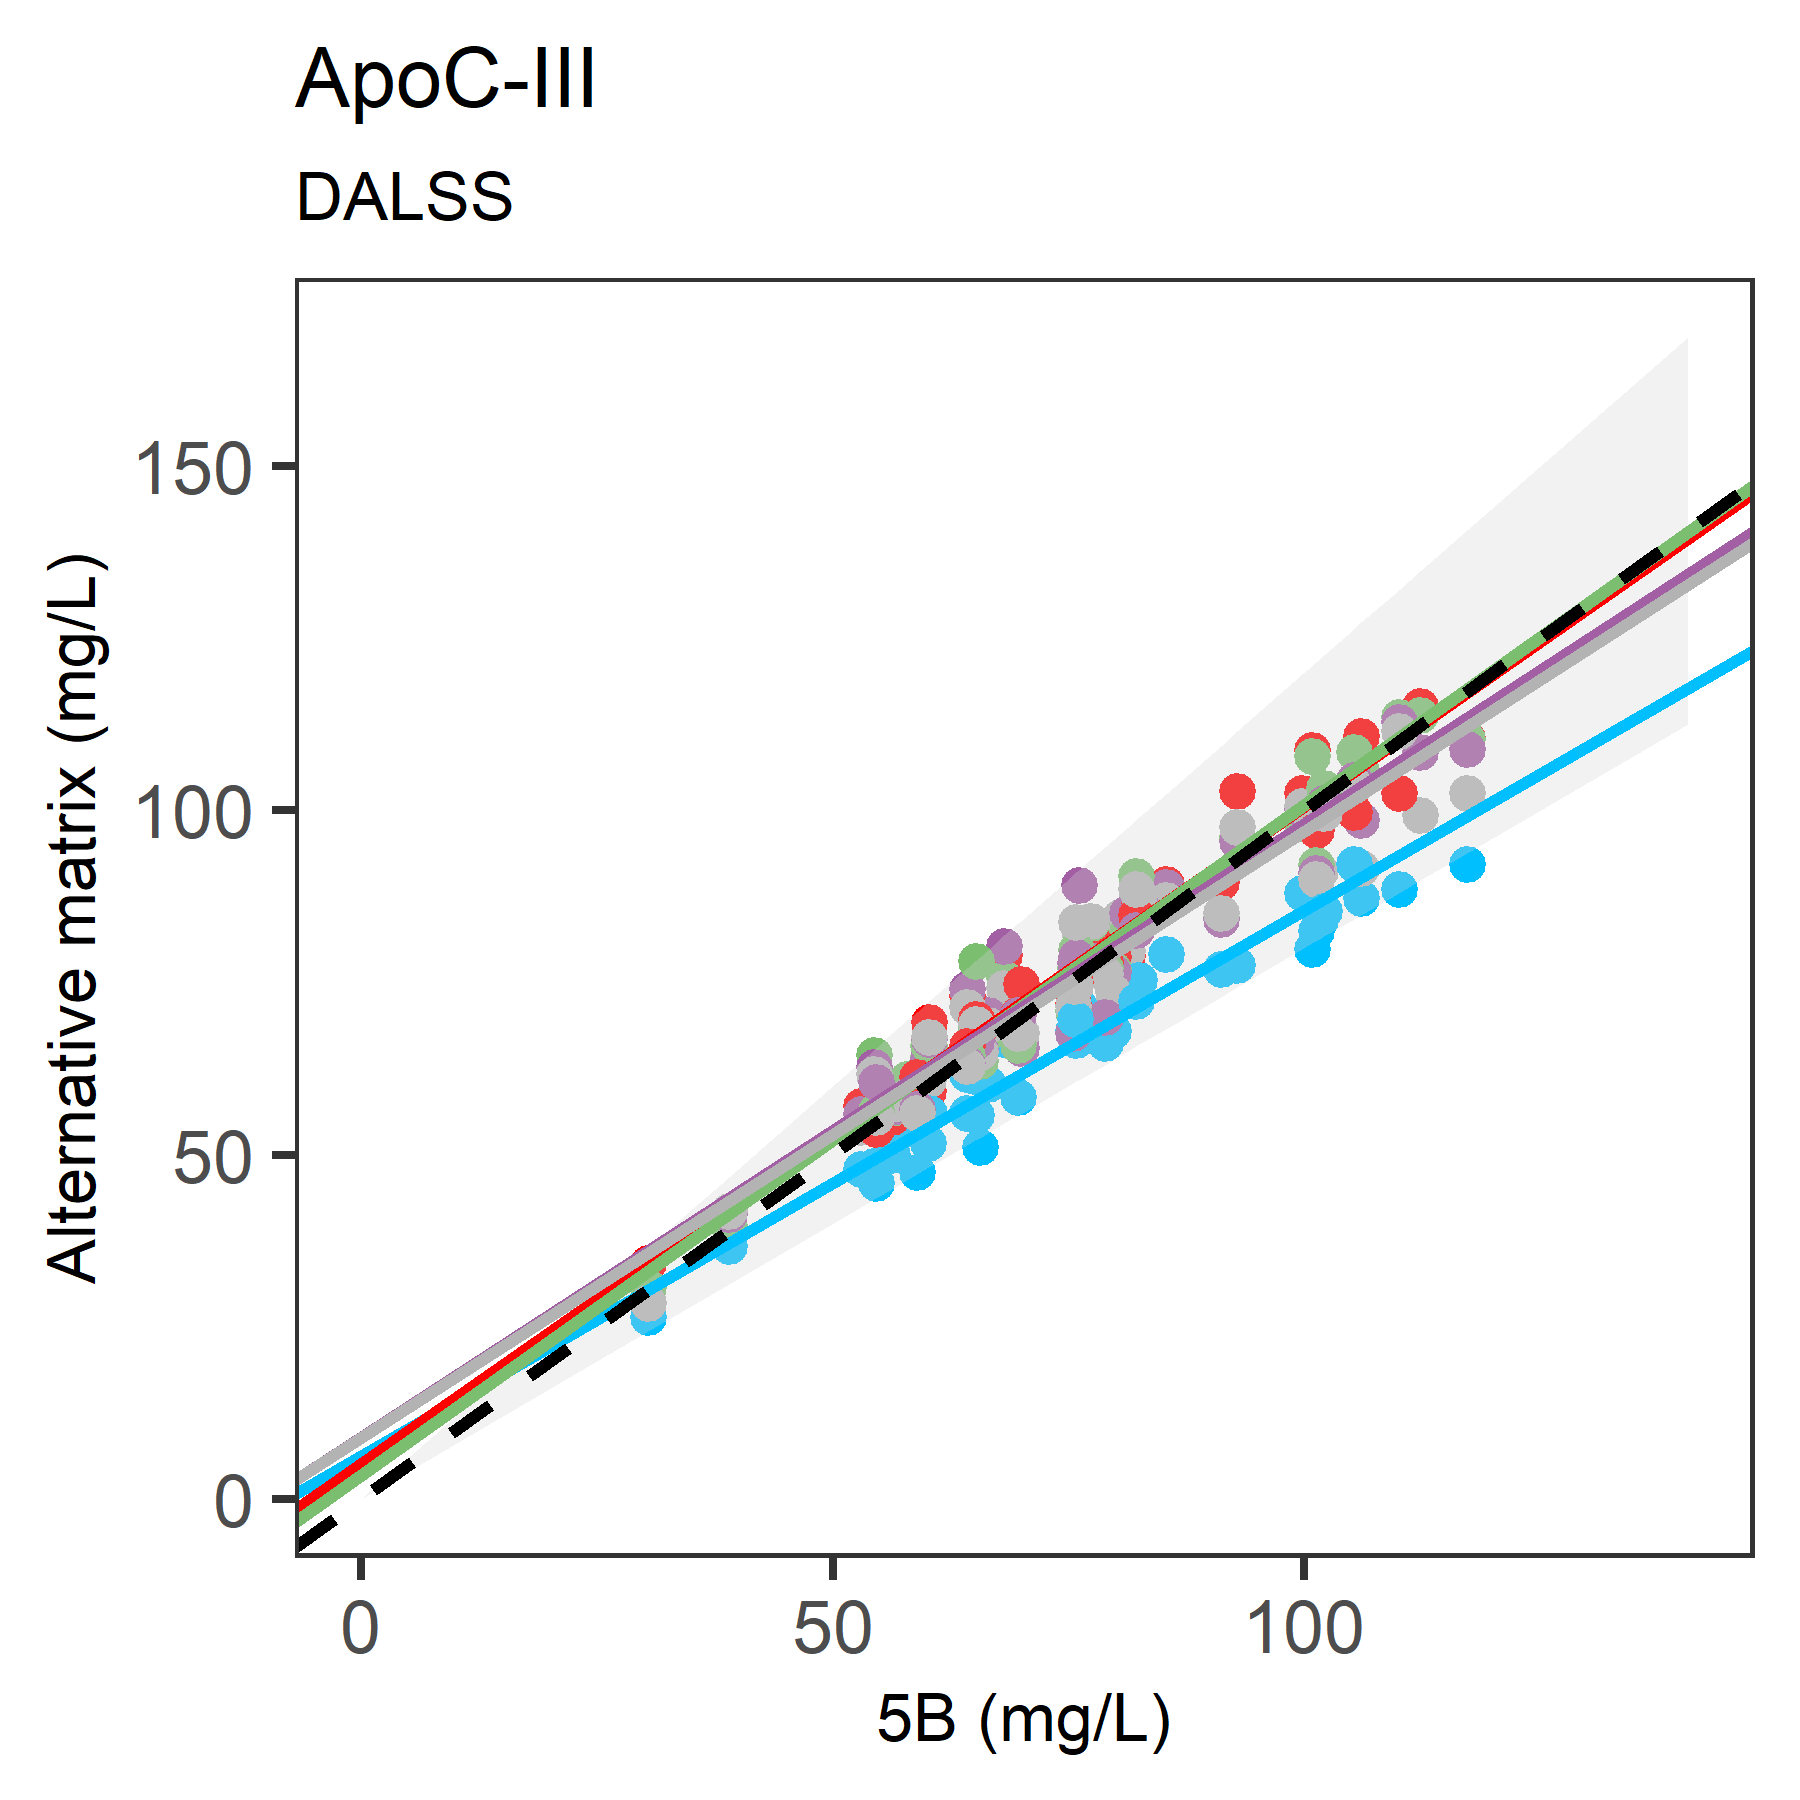

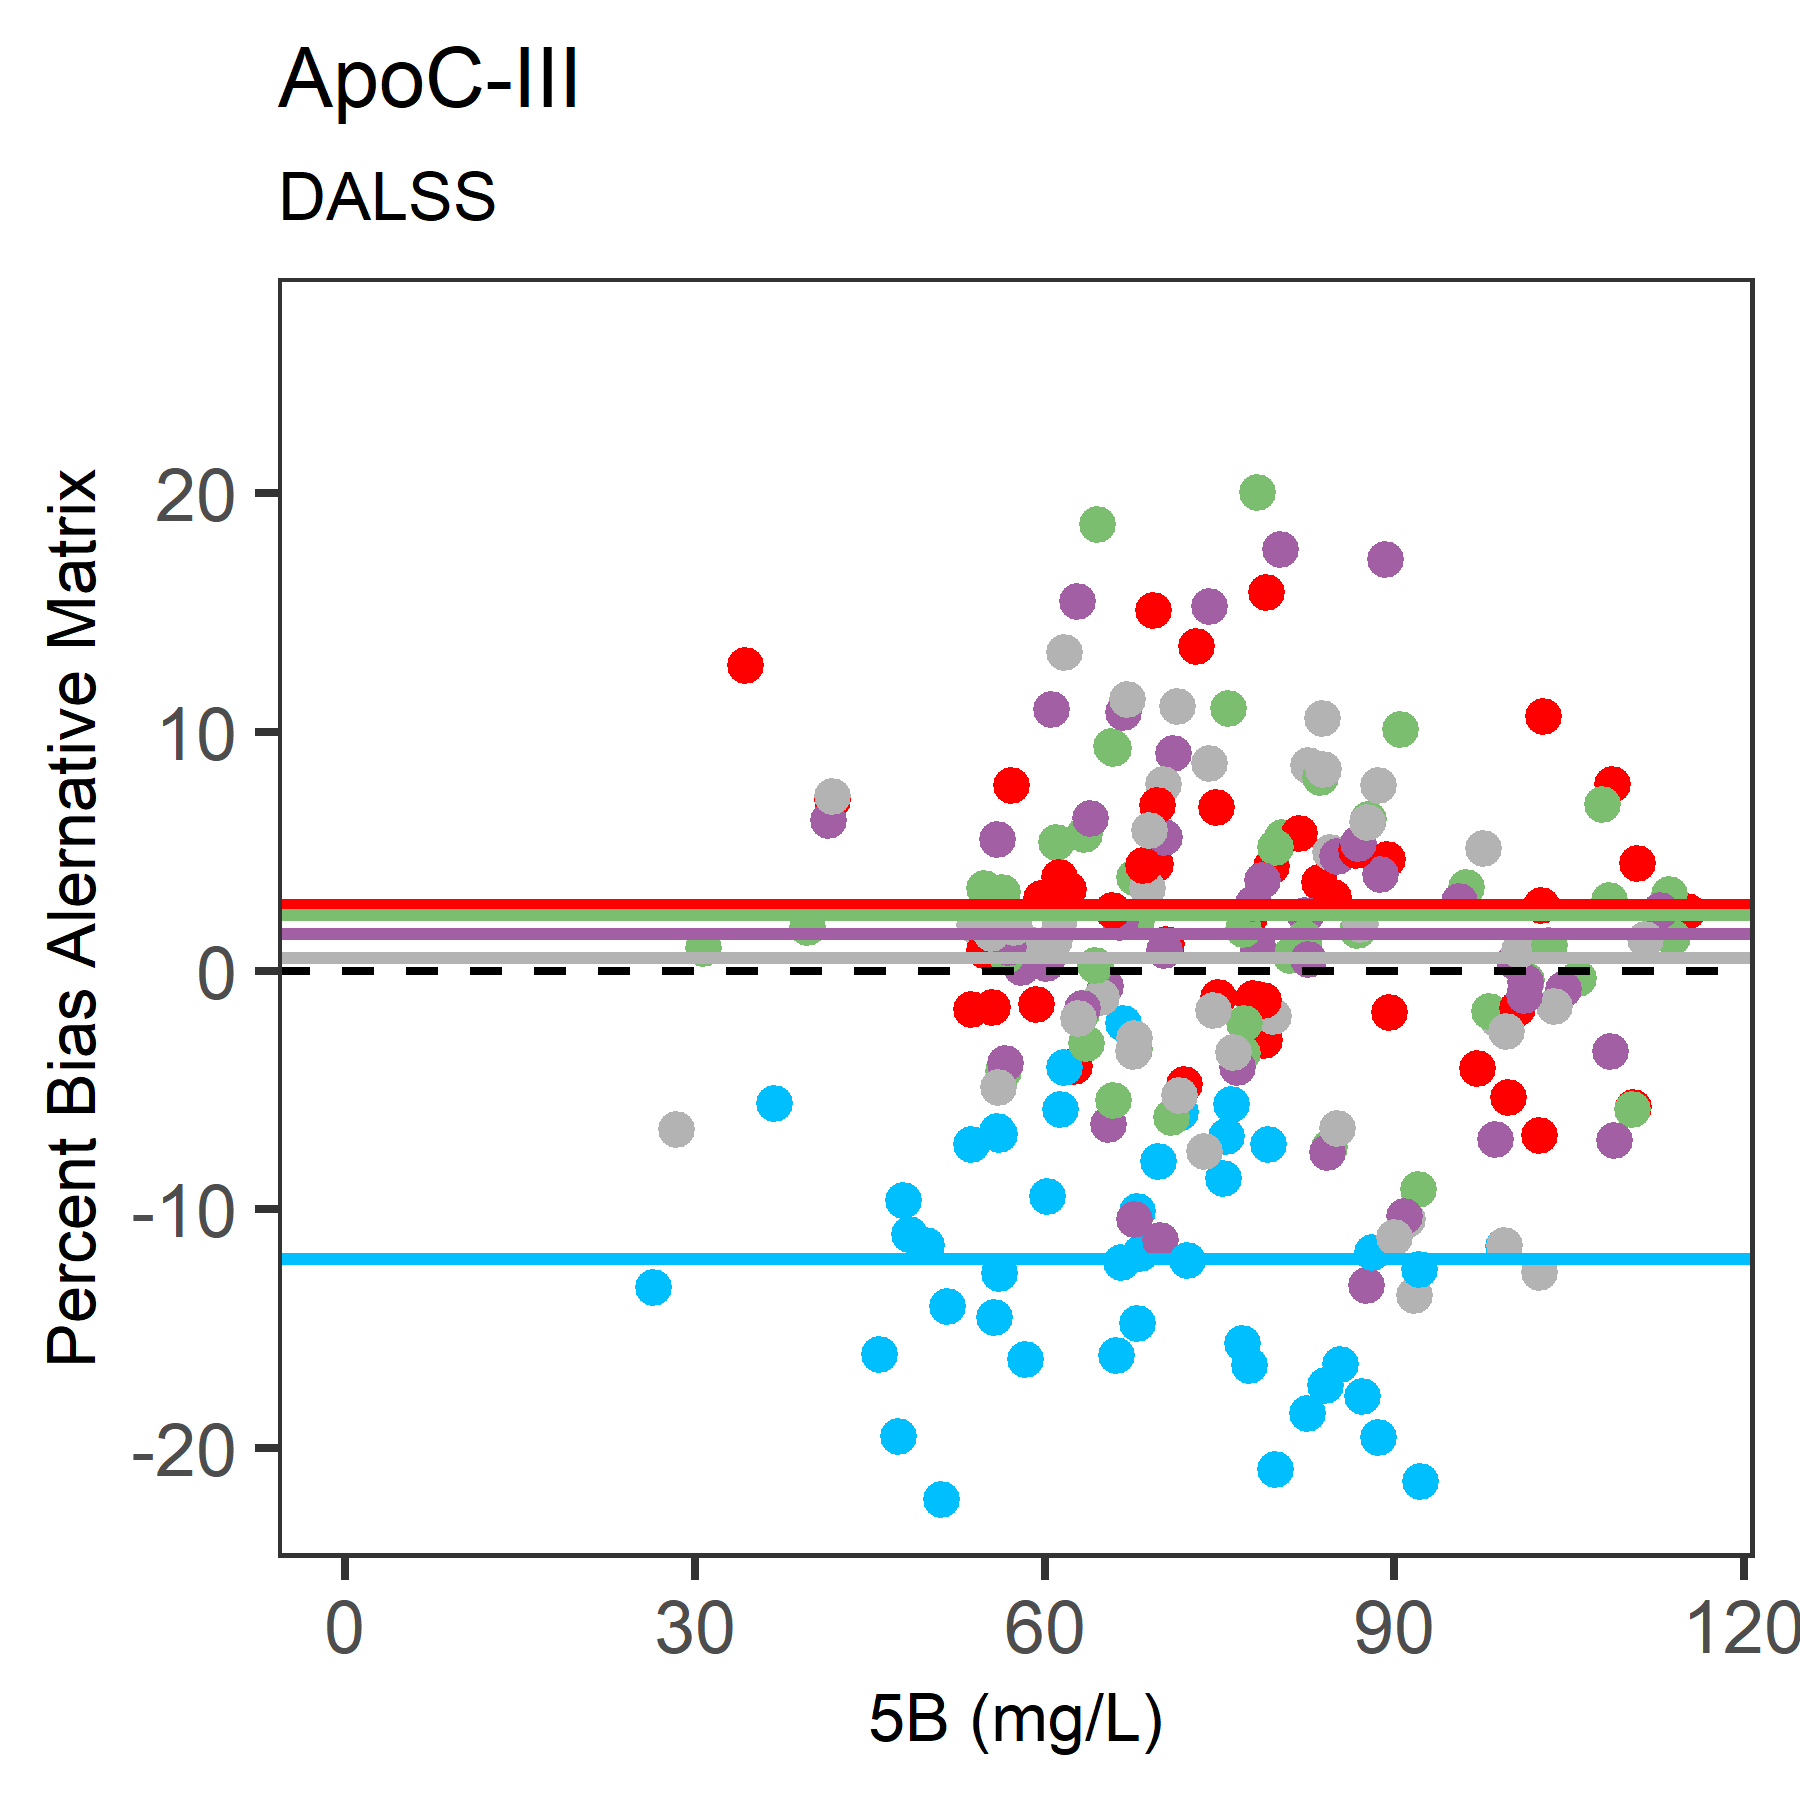


Peptide Comparisons.


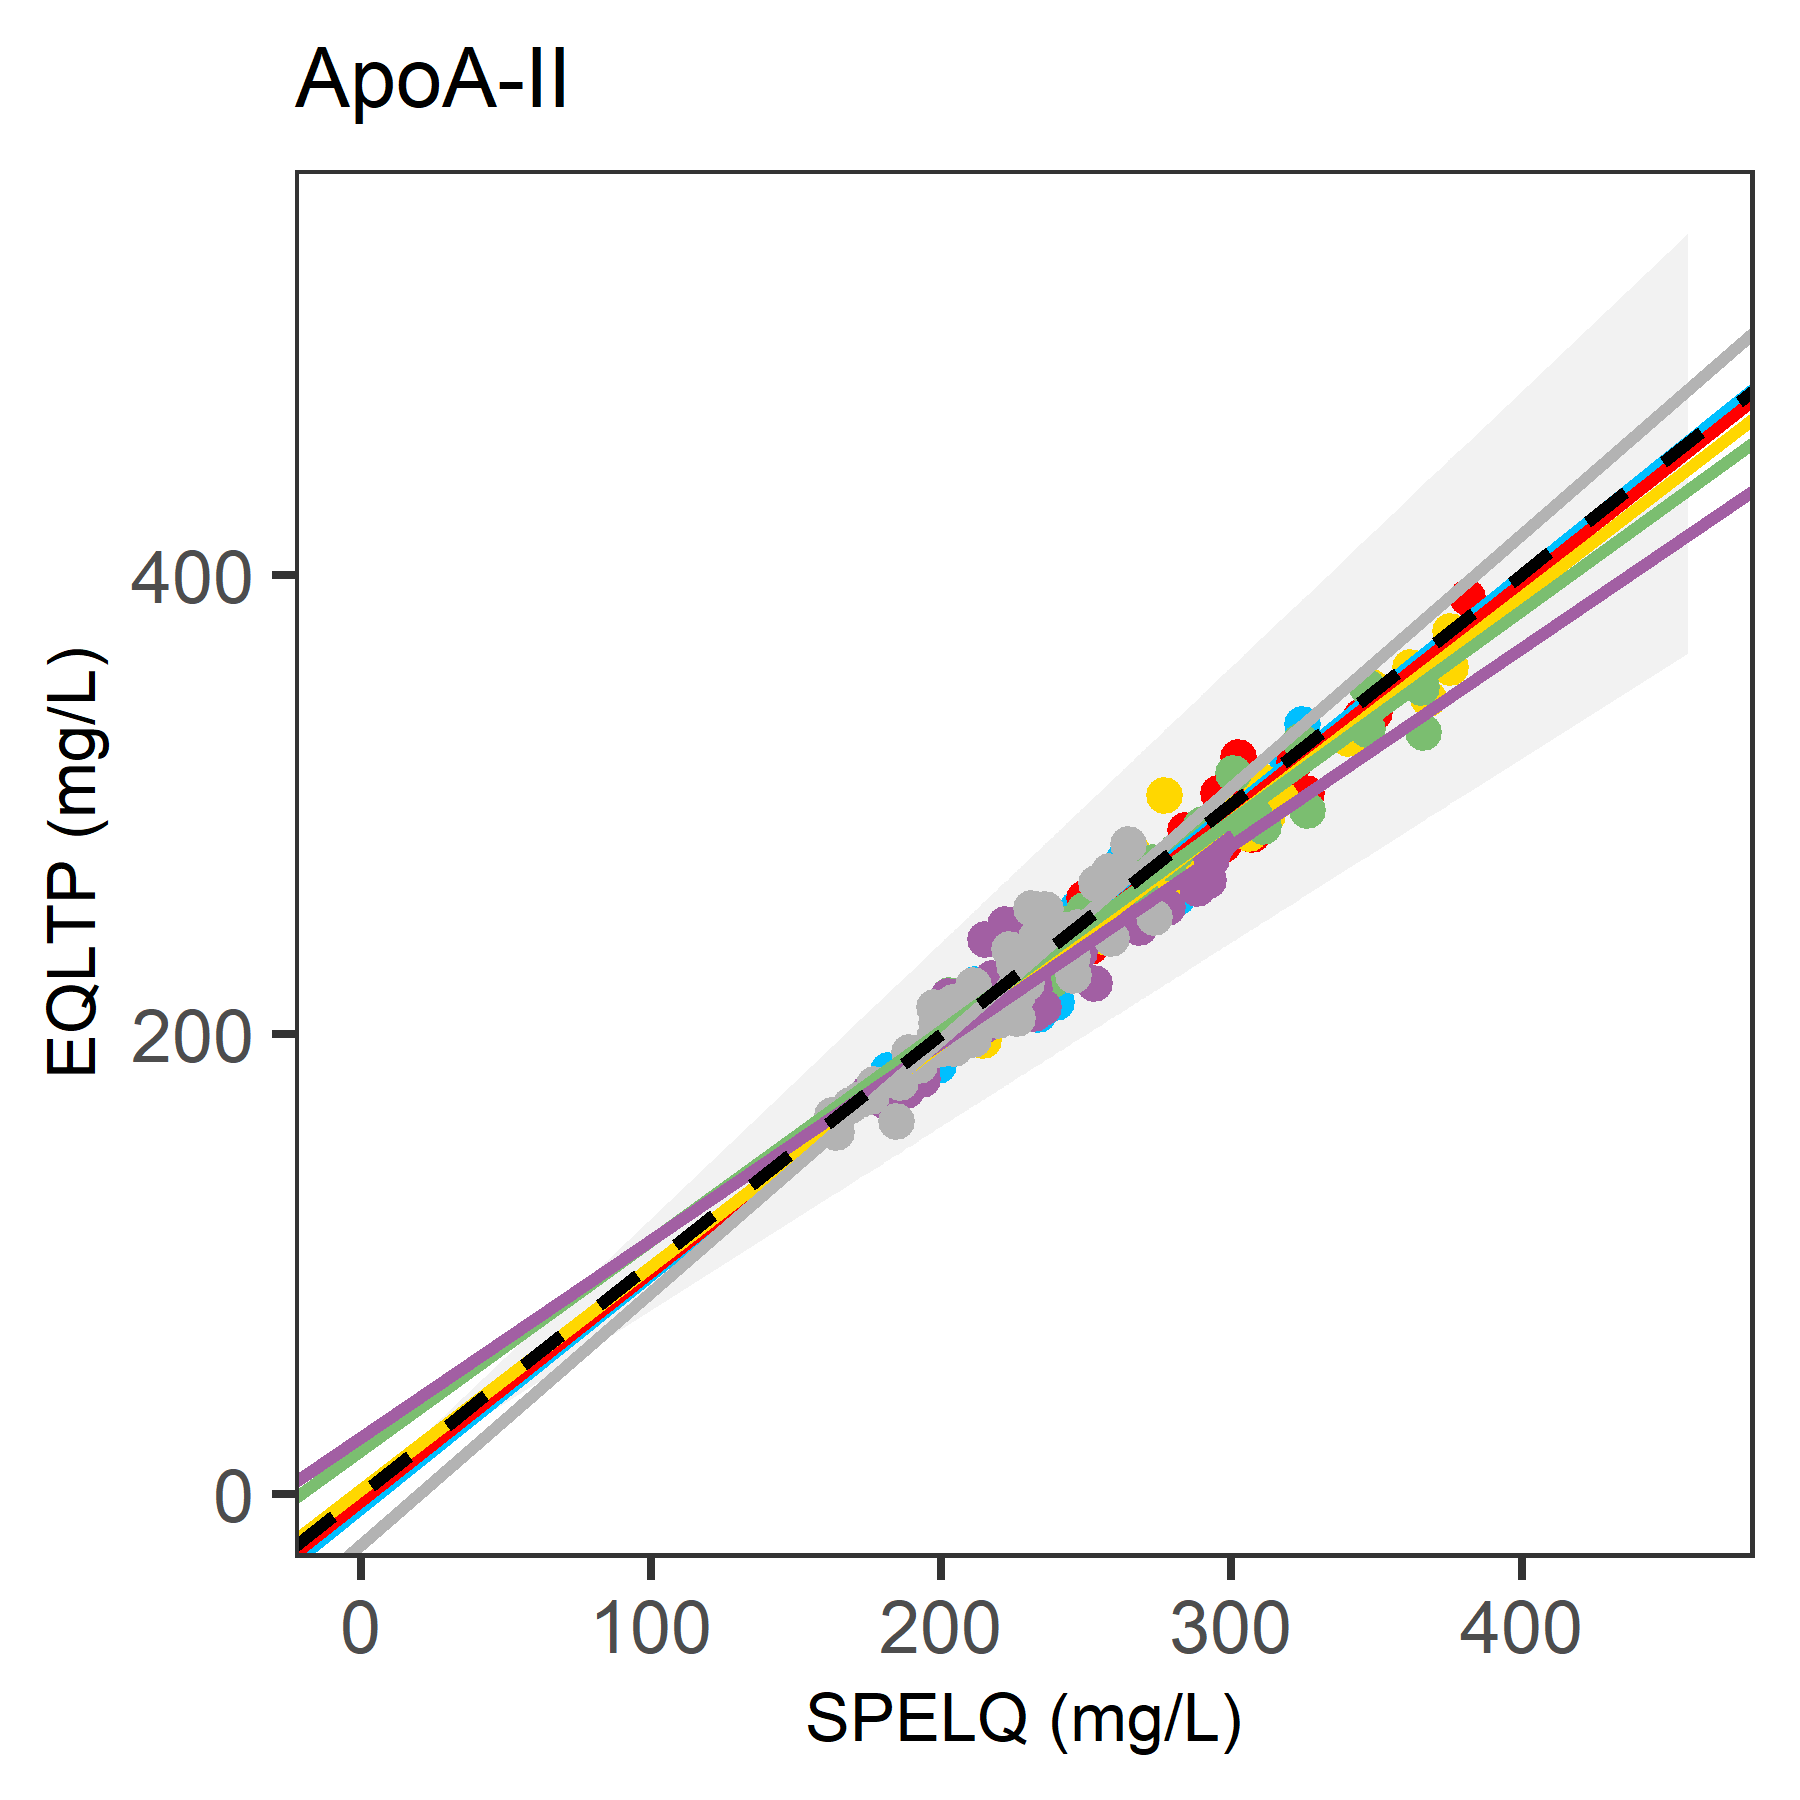

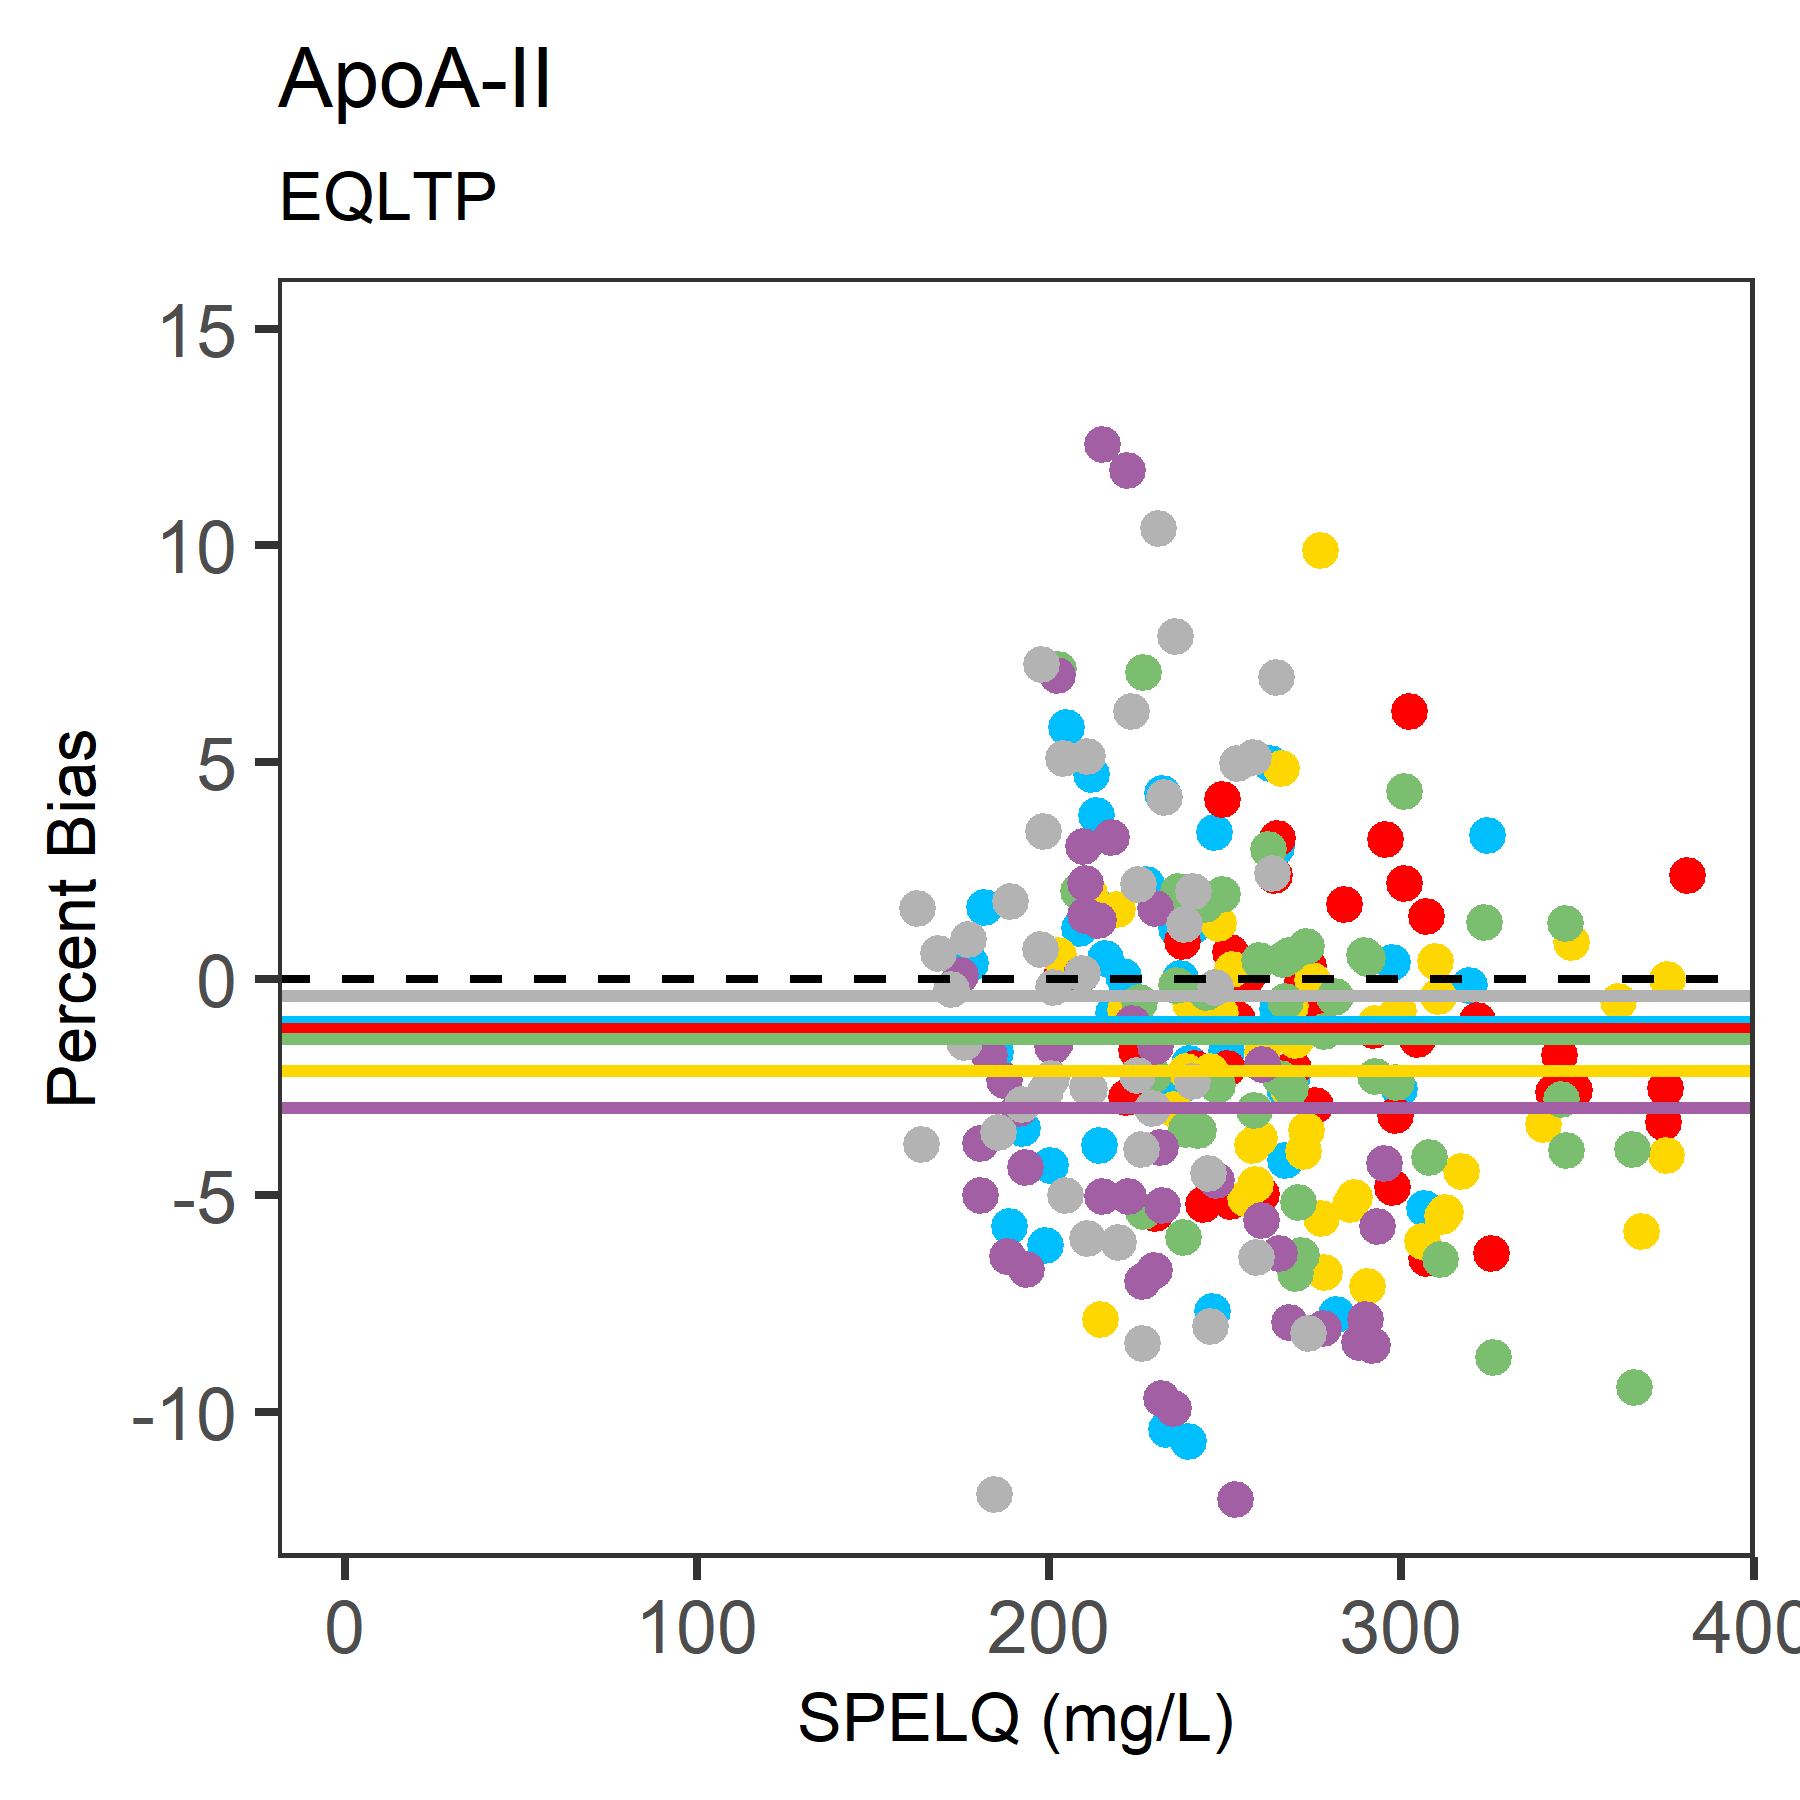

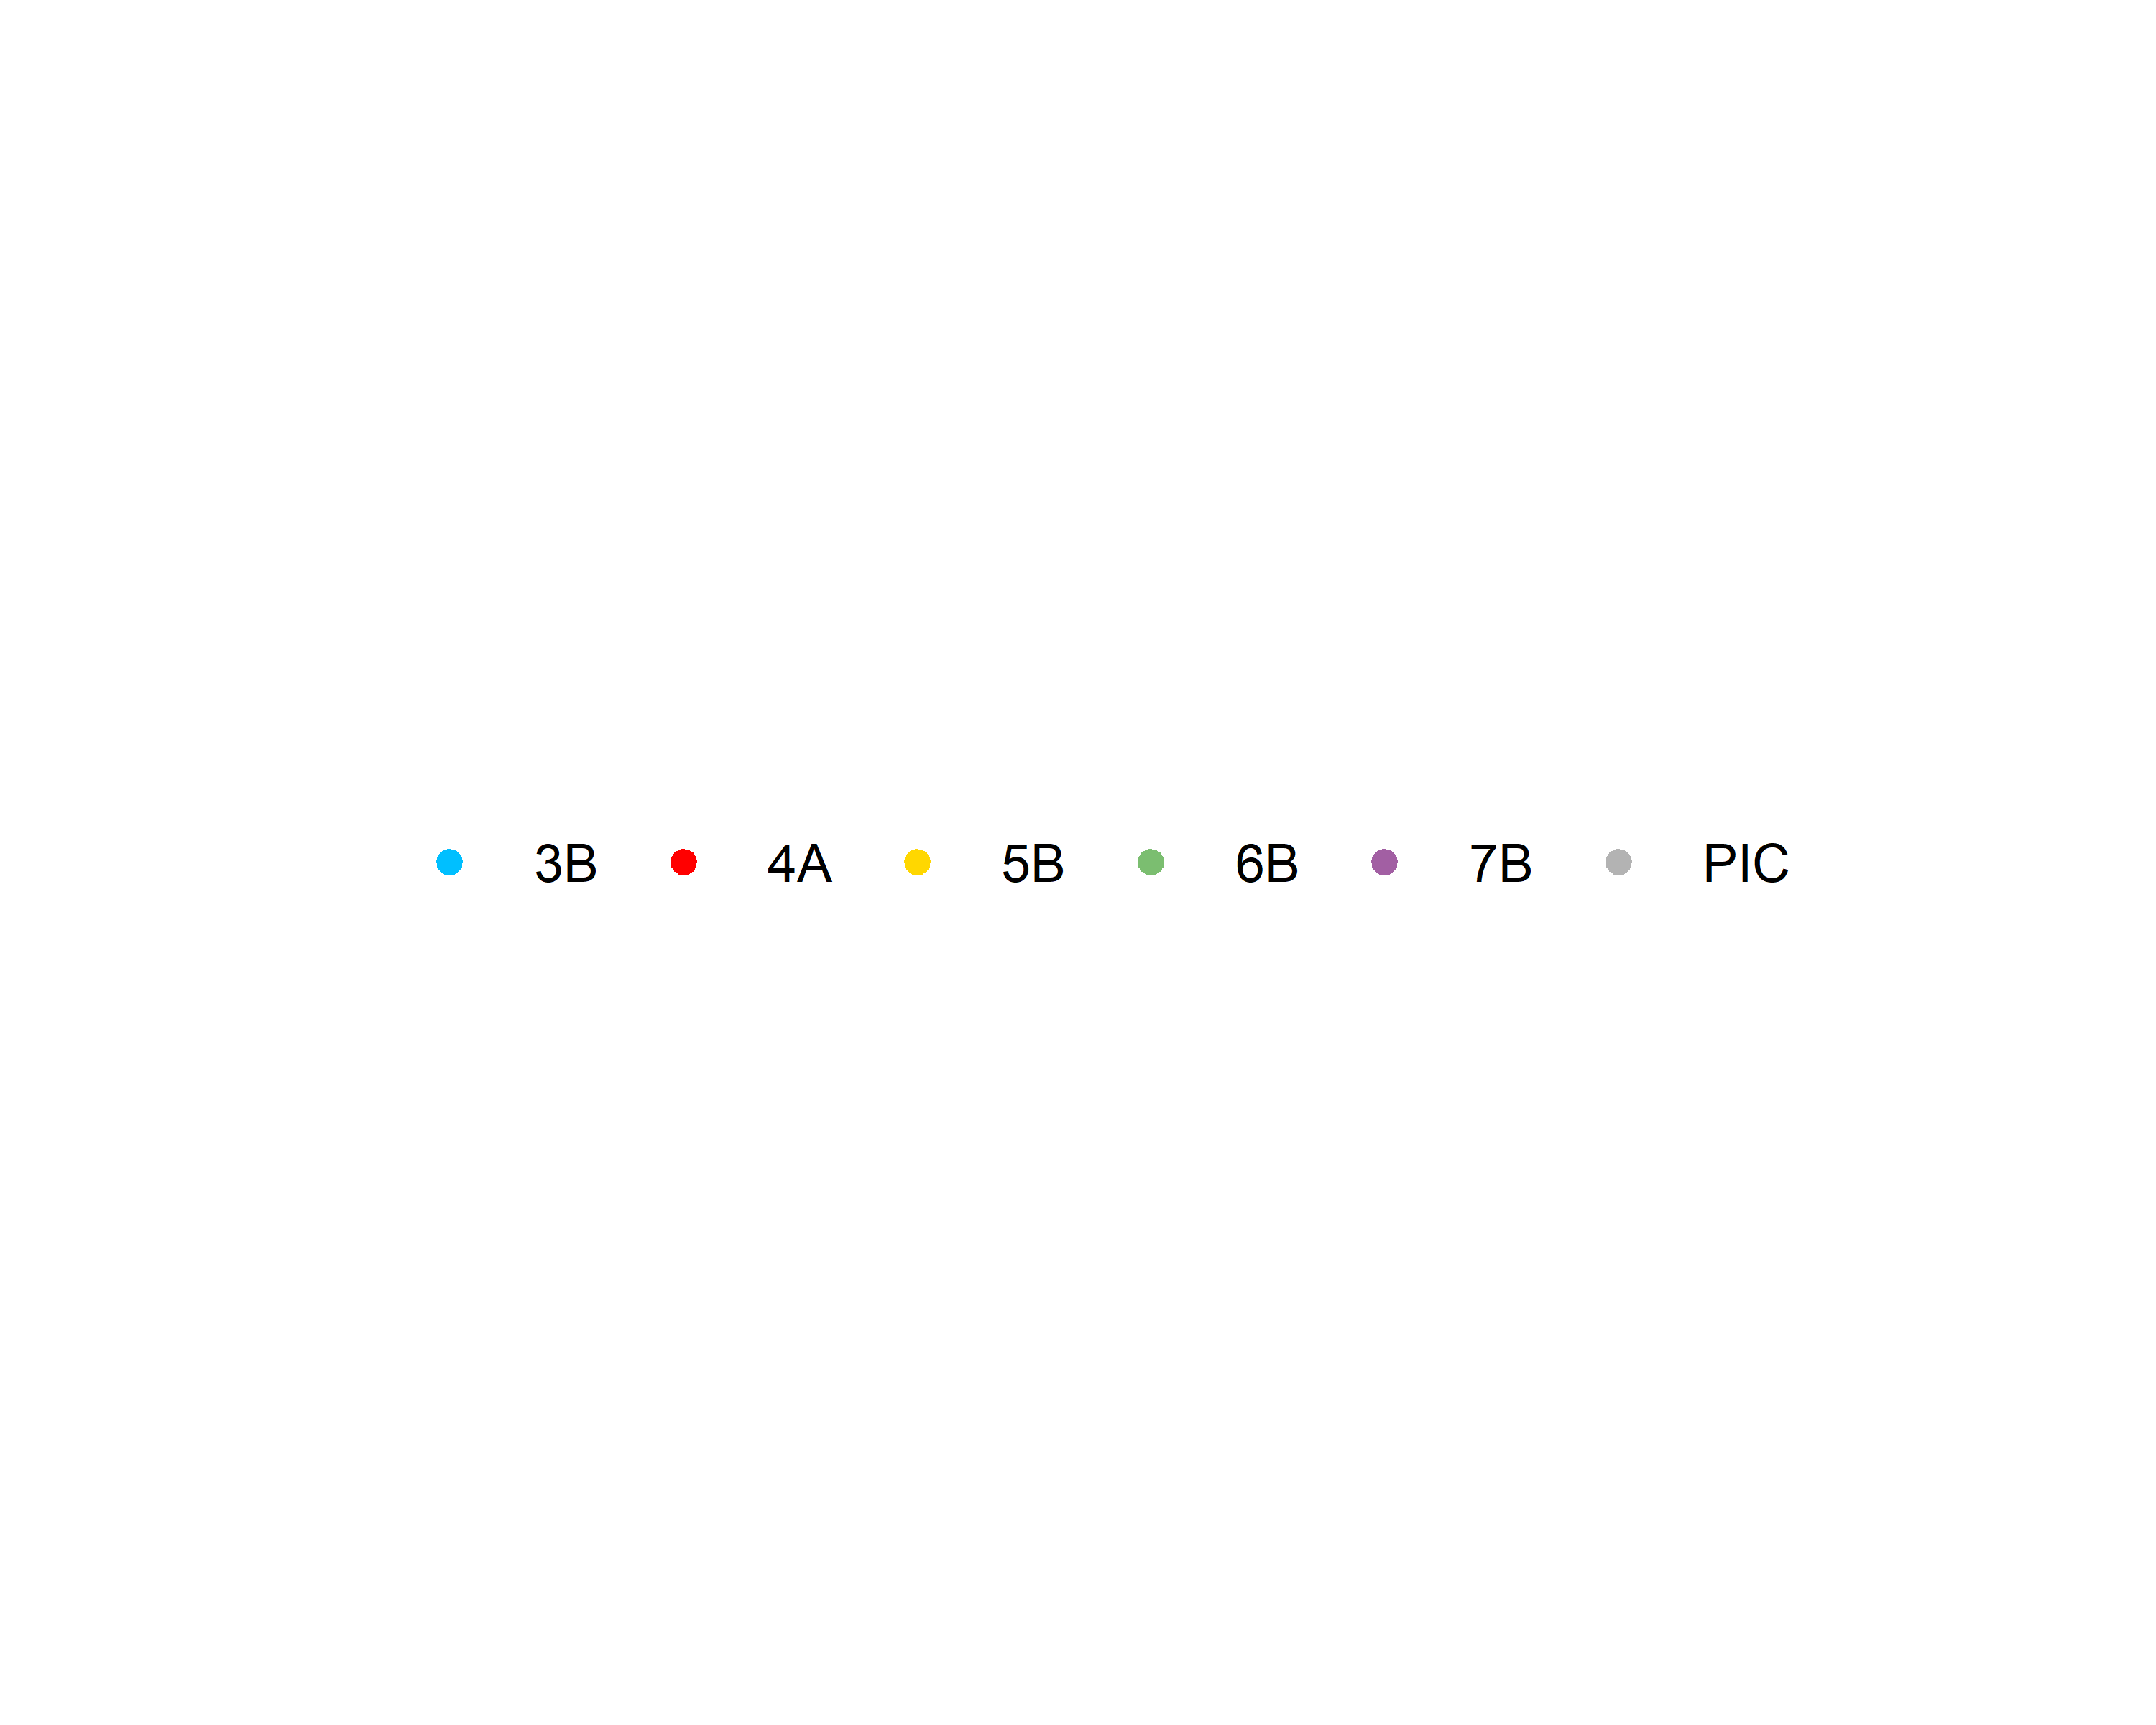


S1(B)


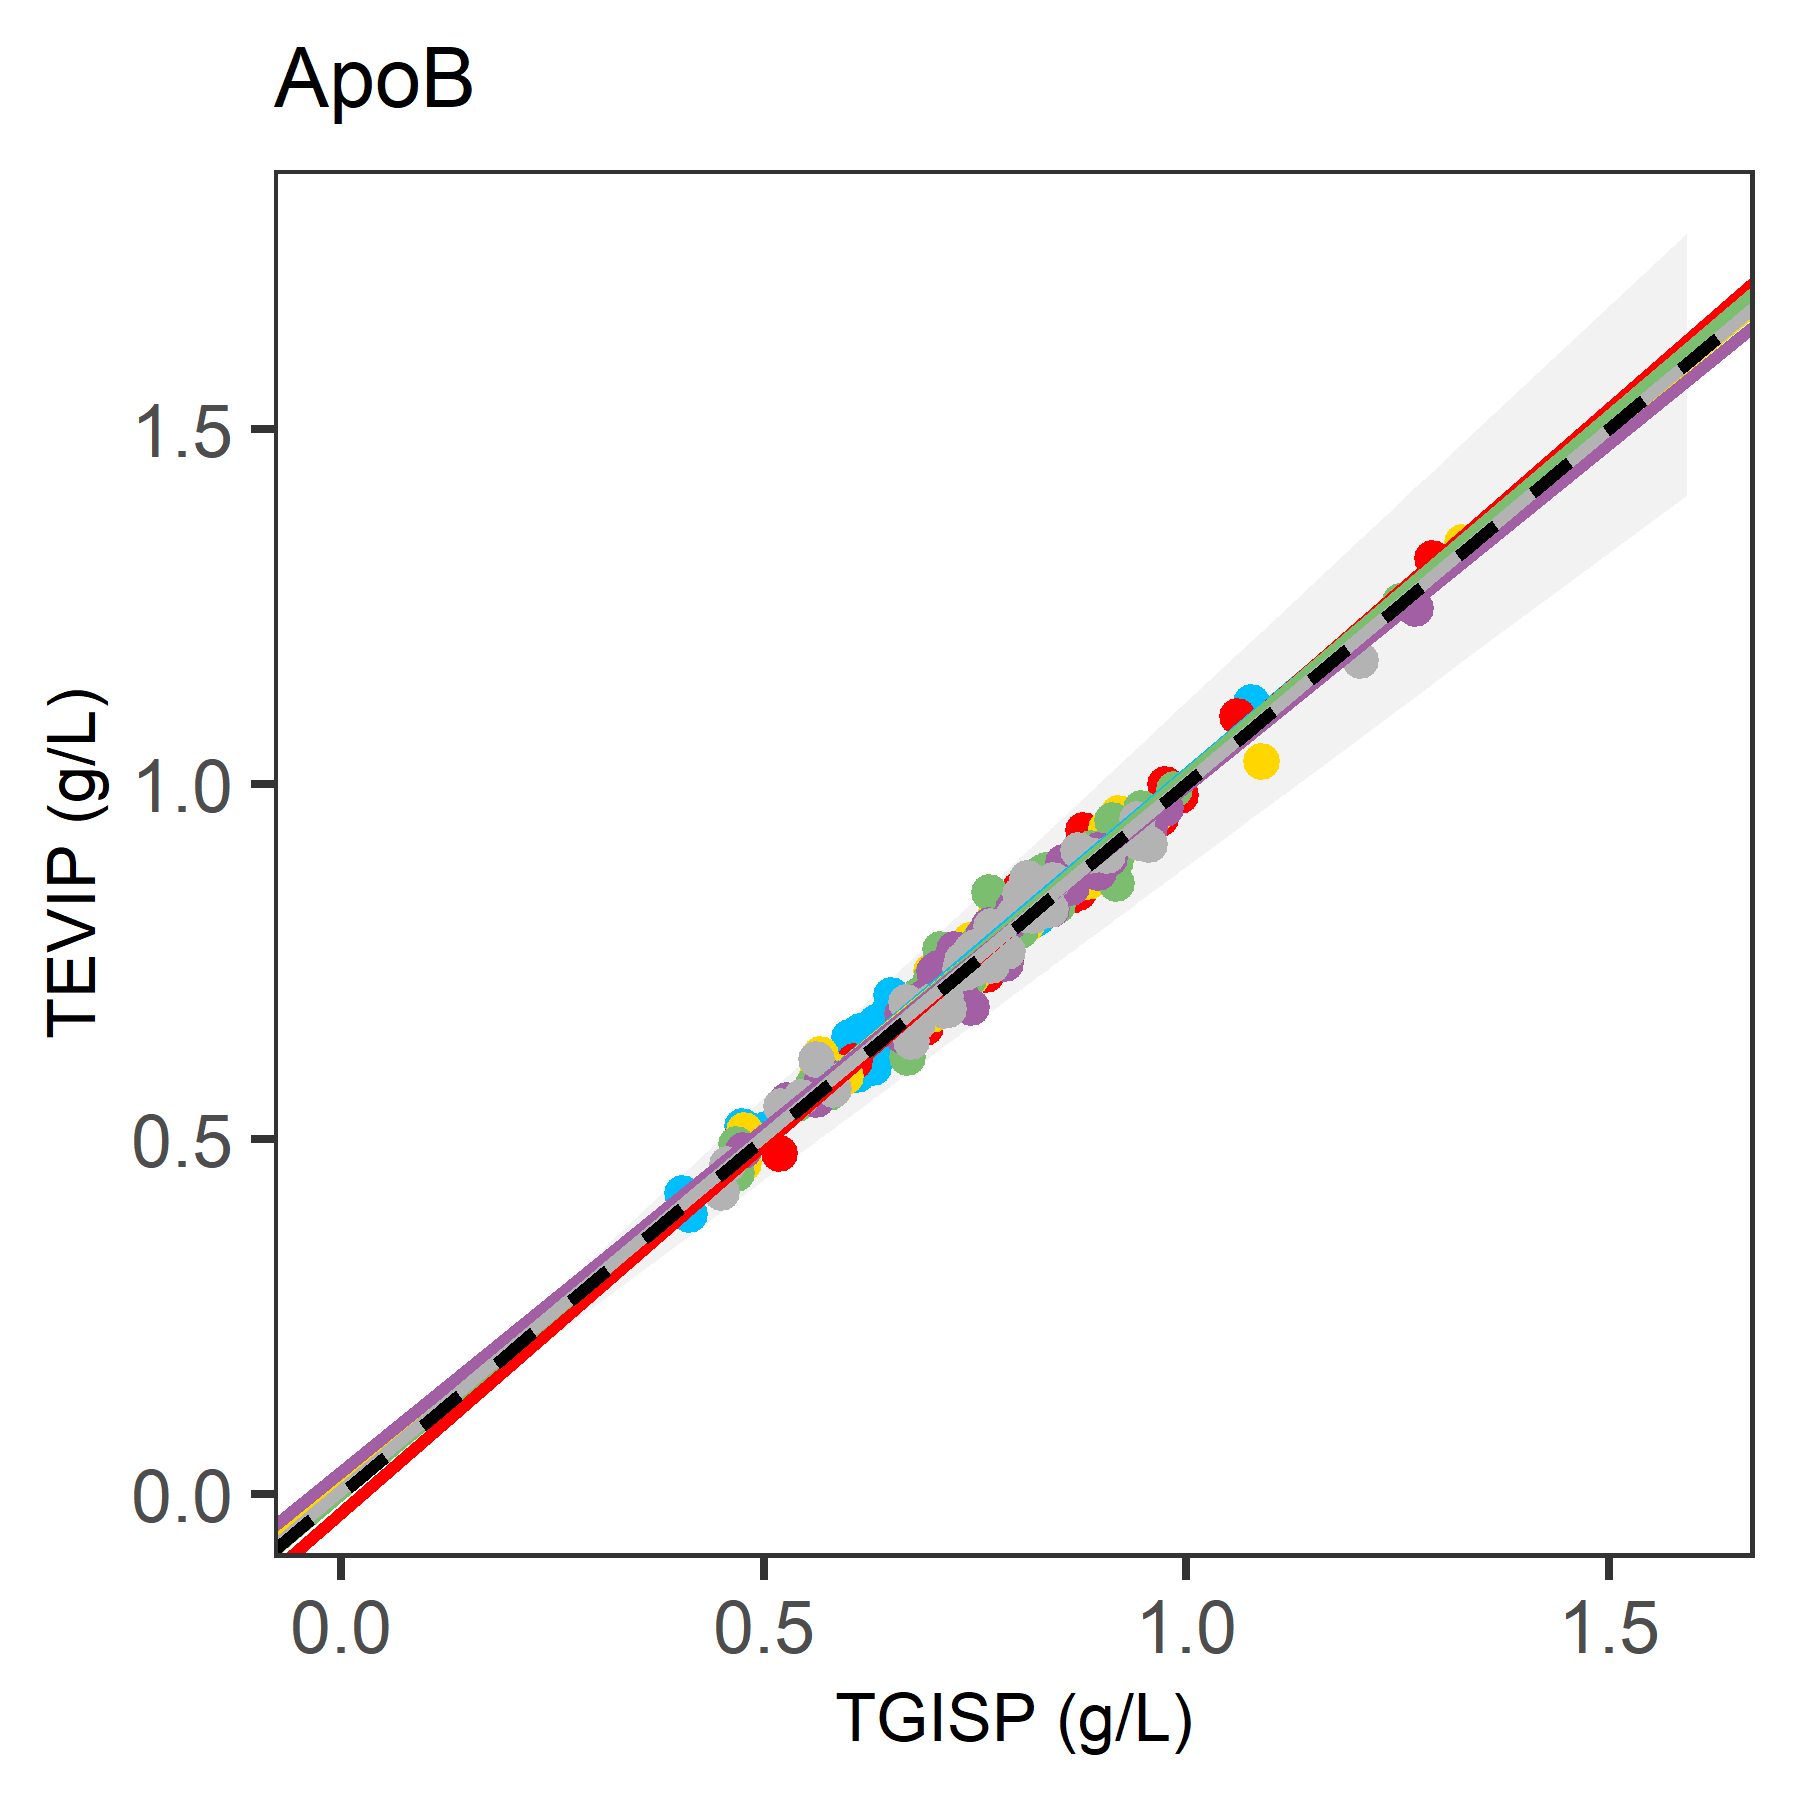

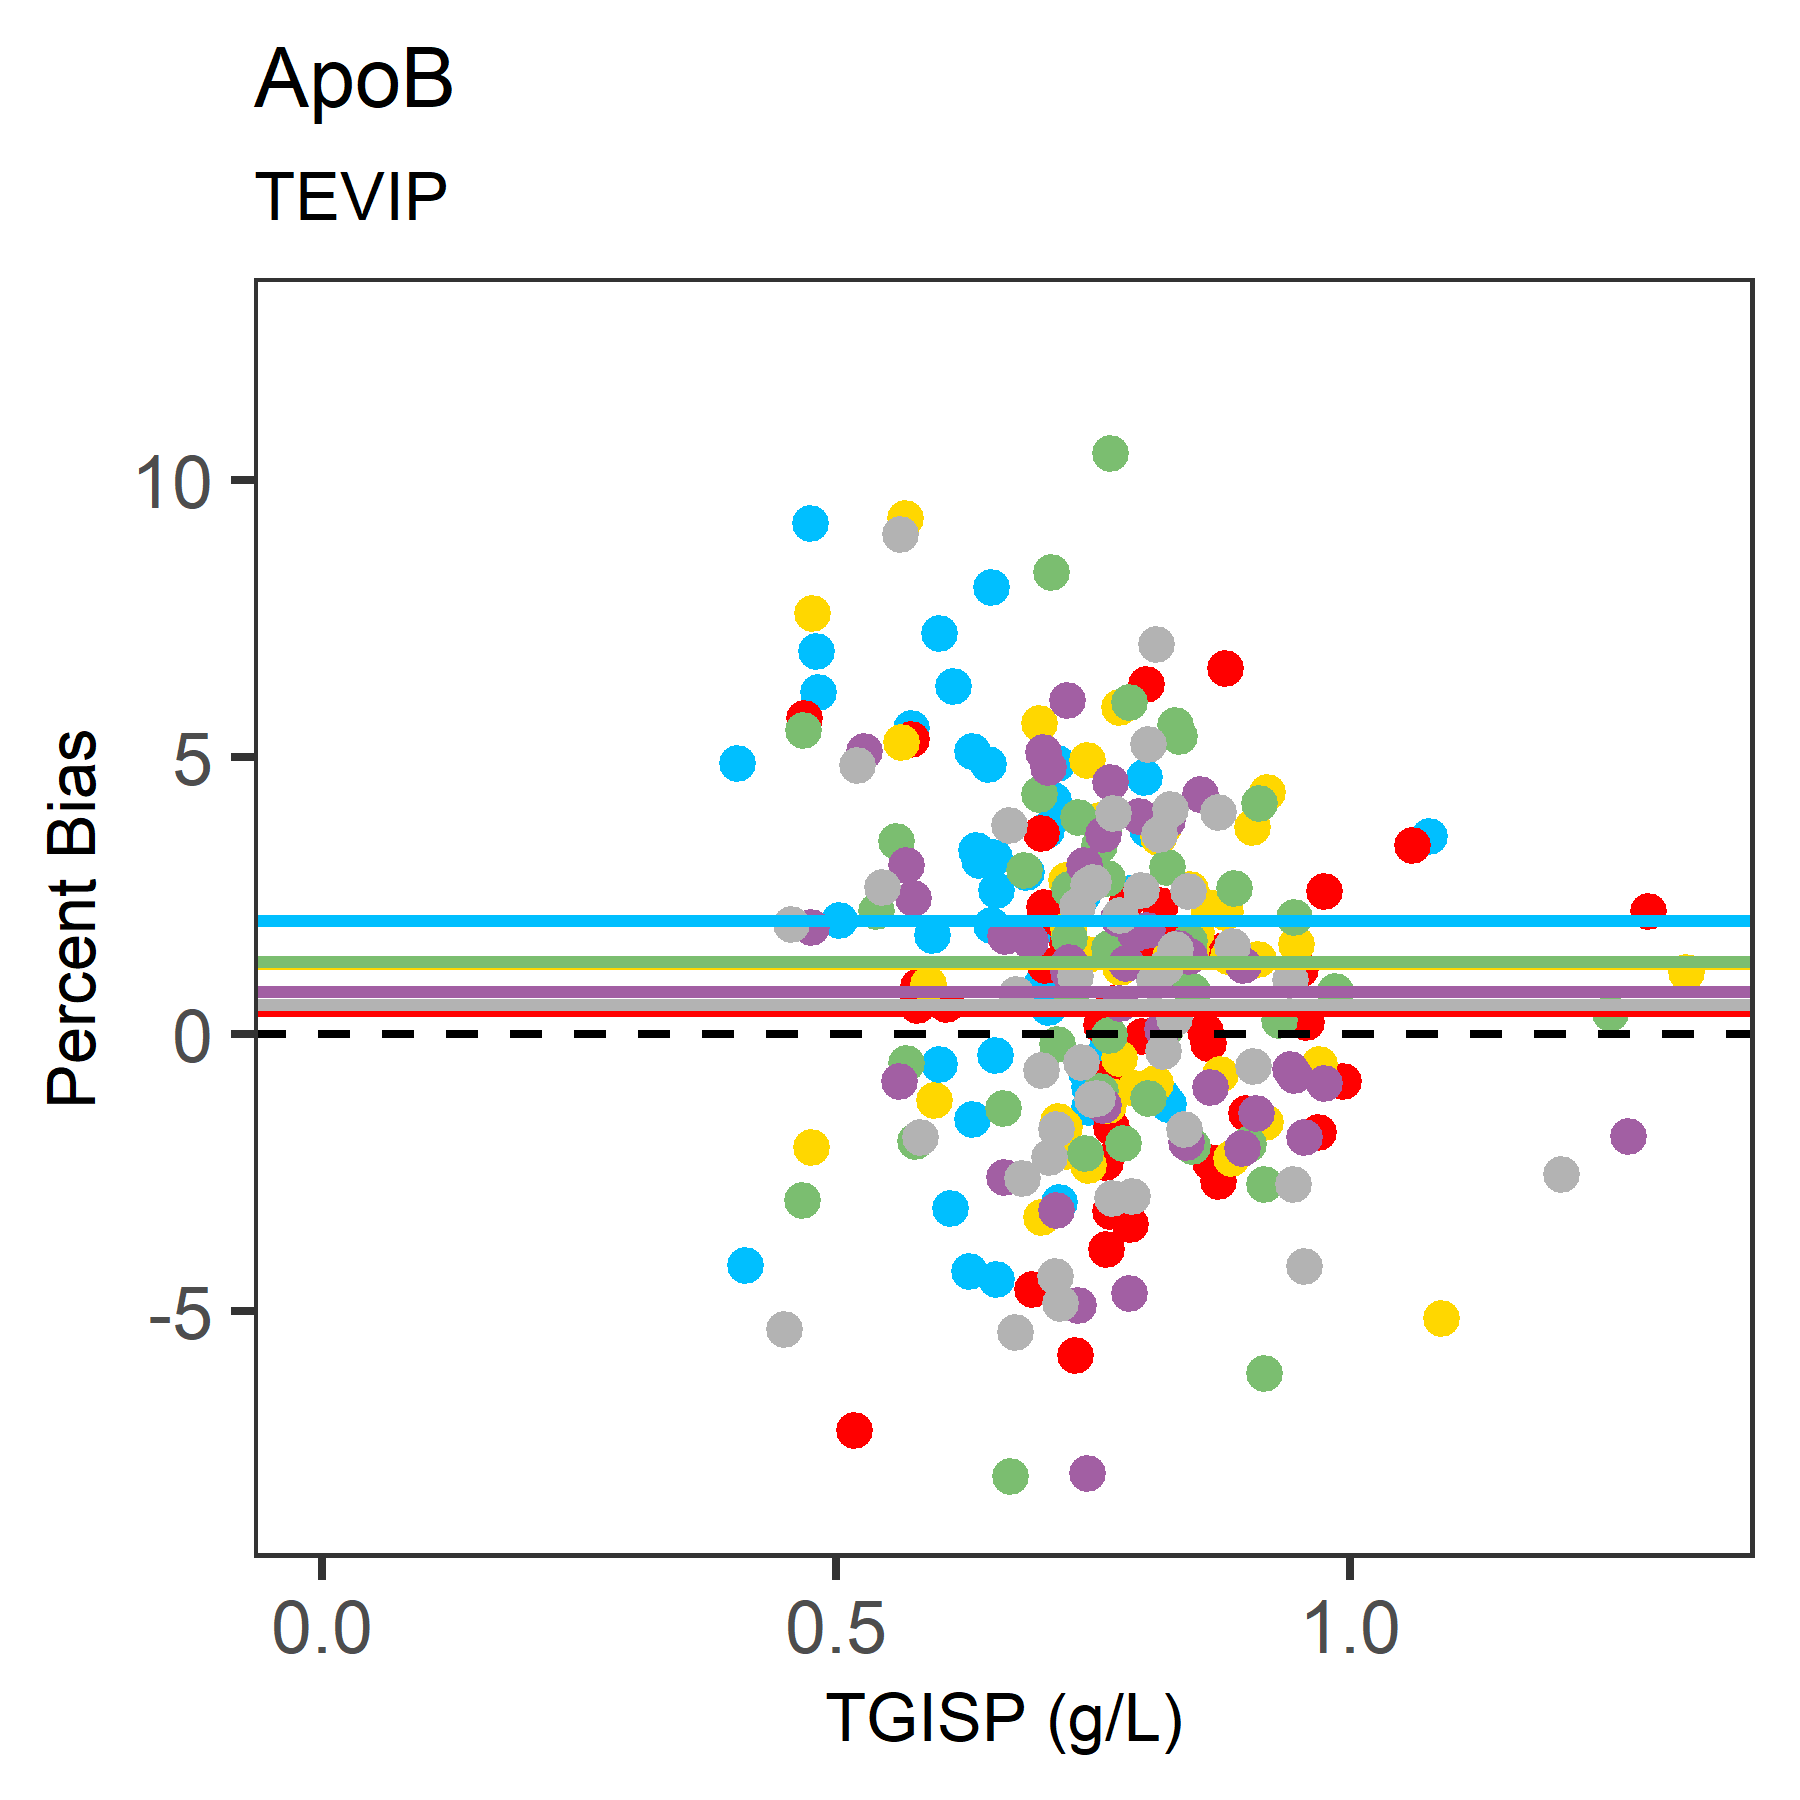

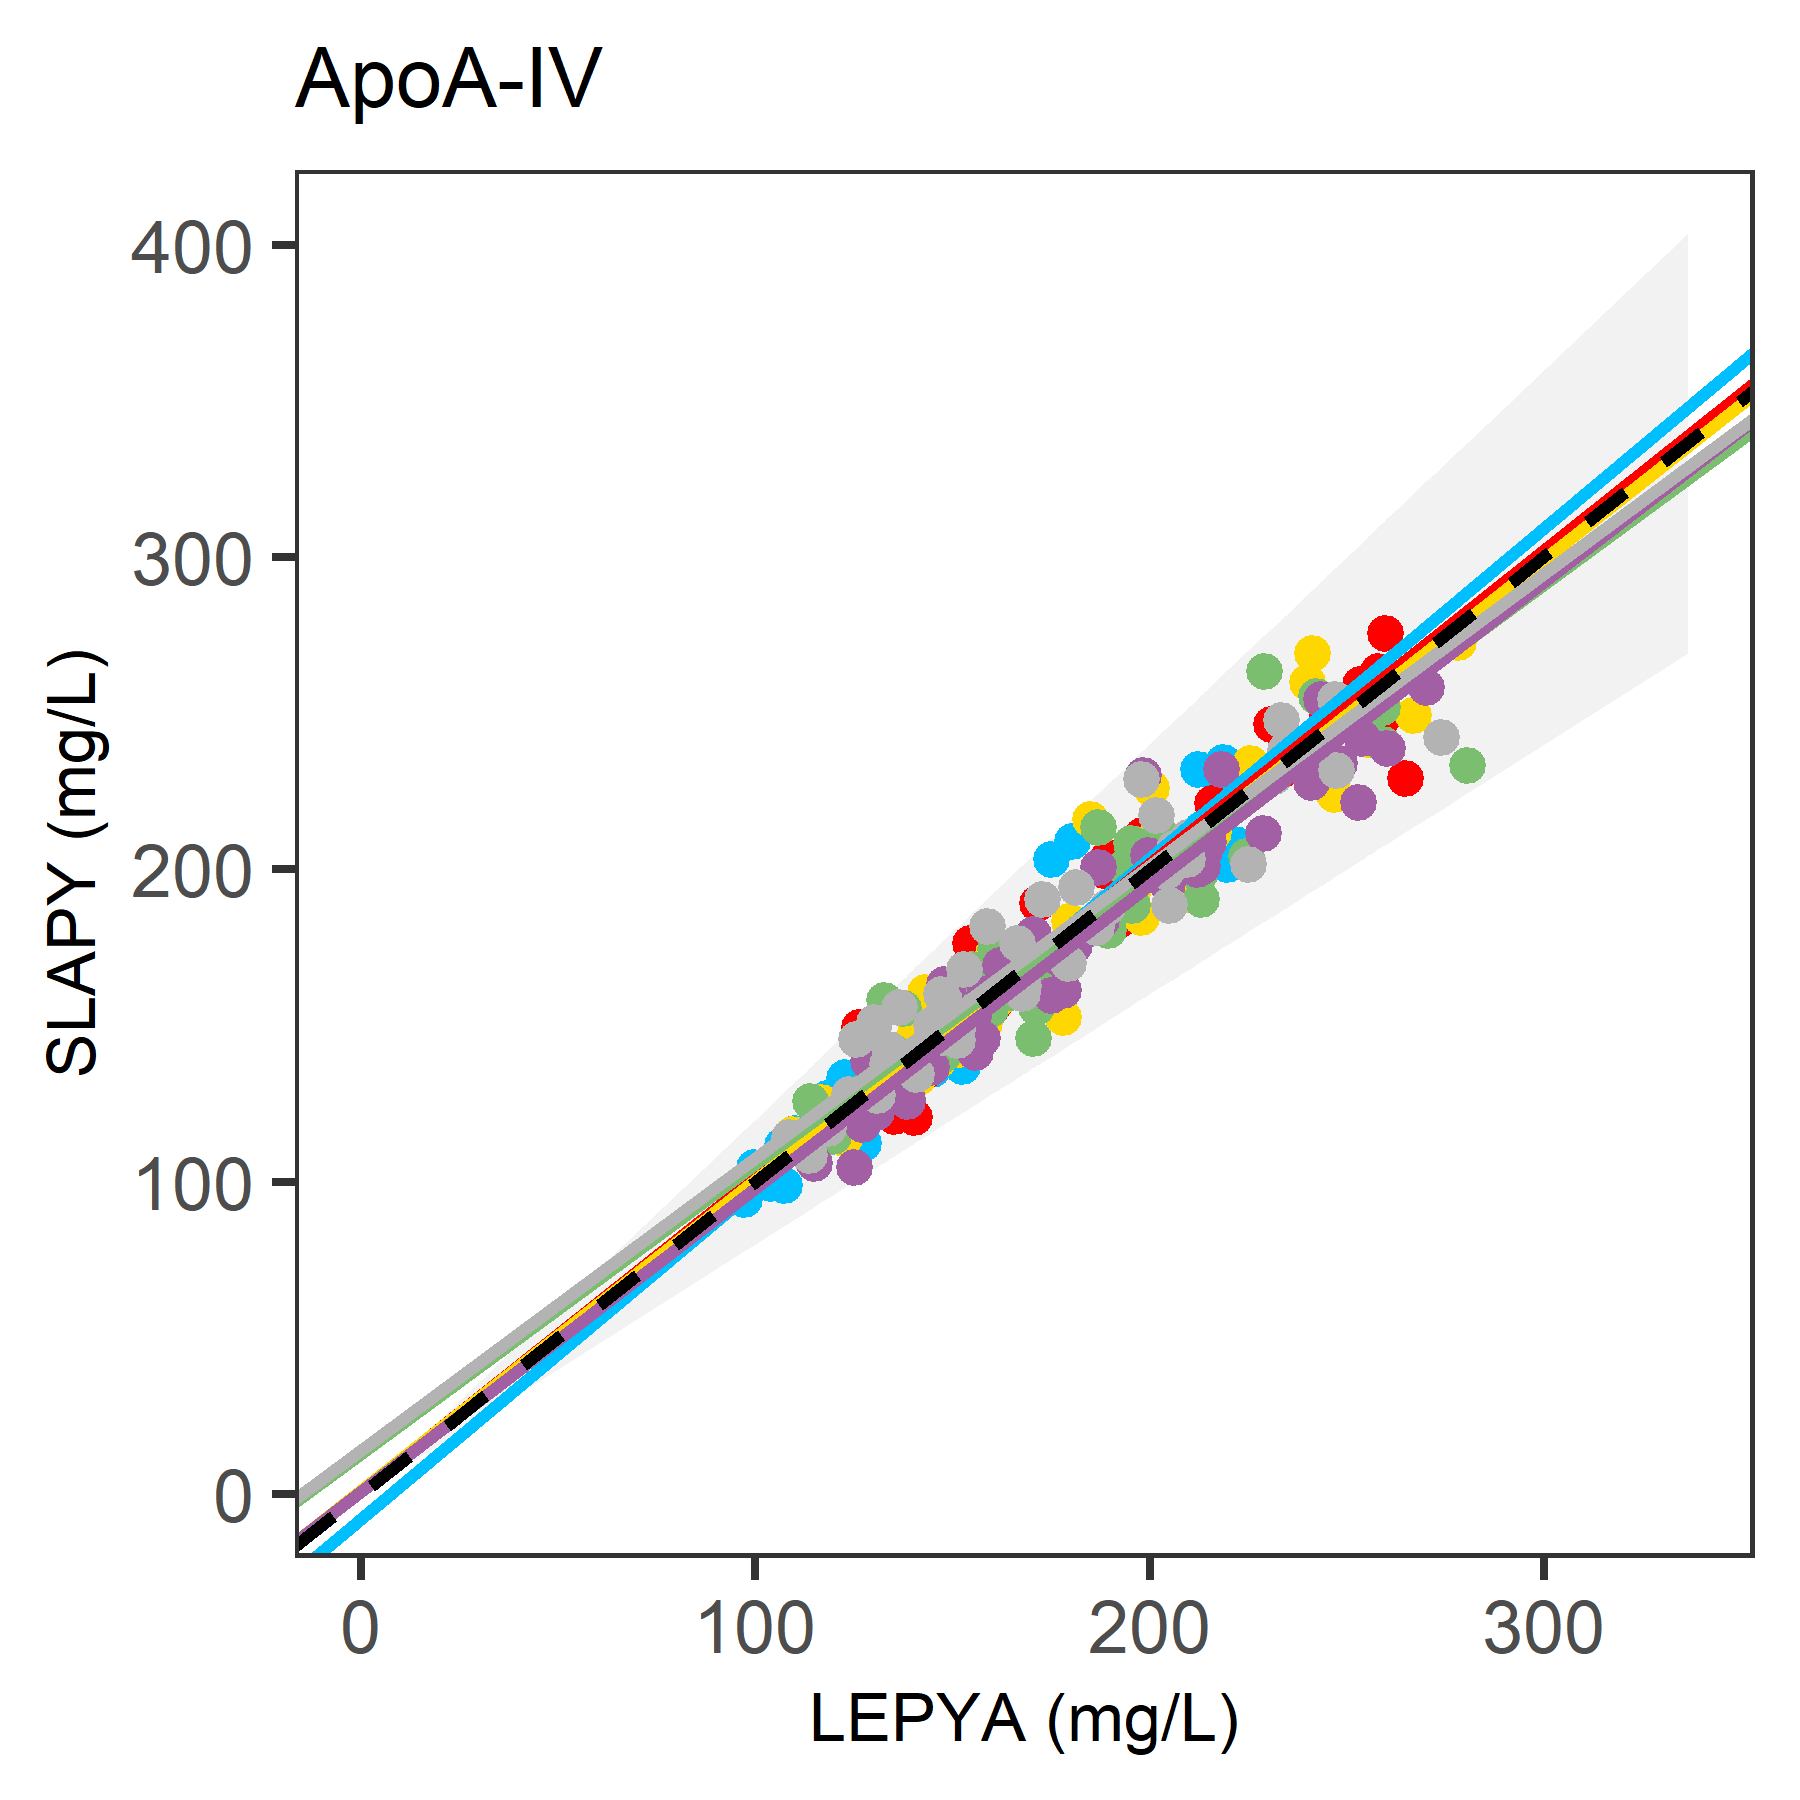

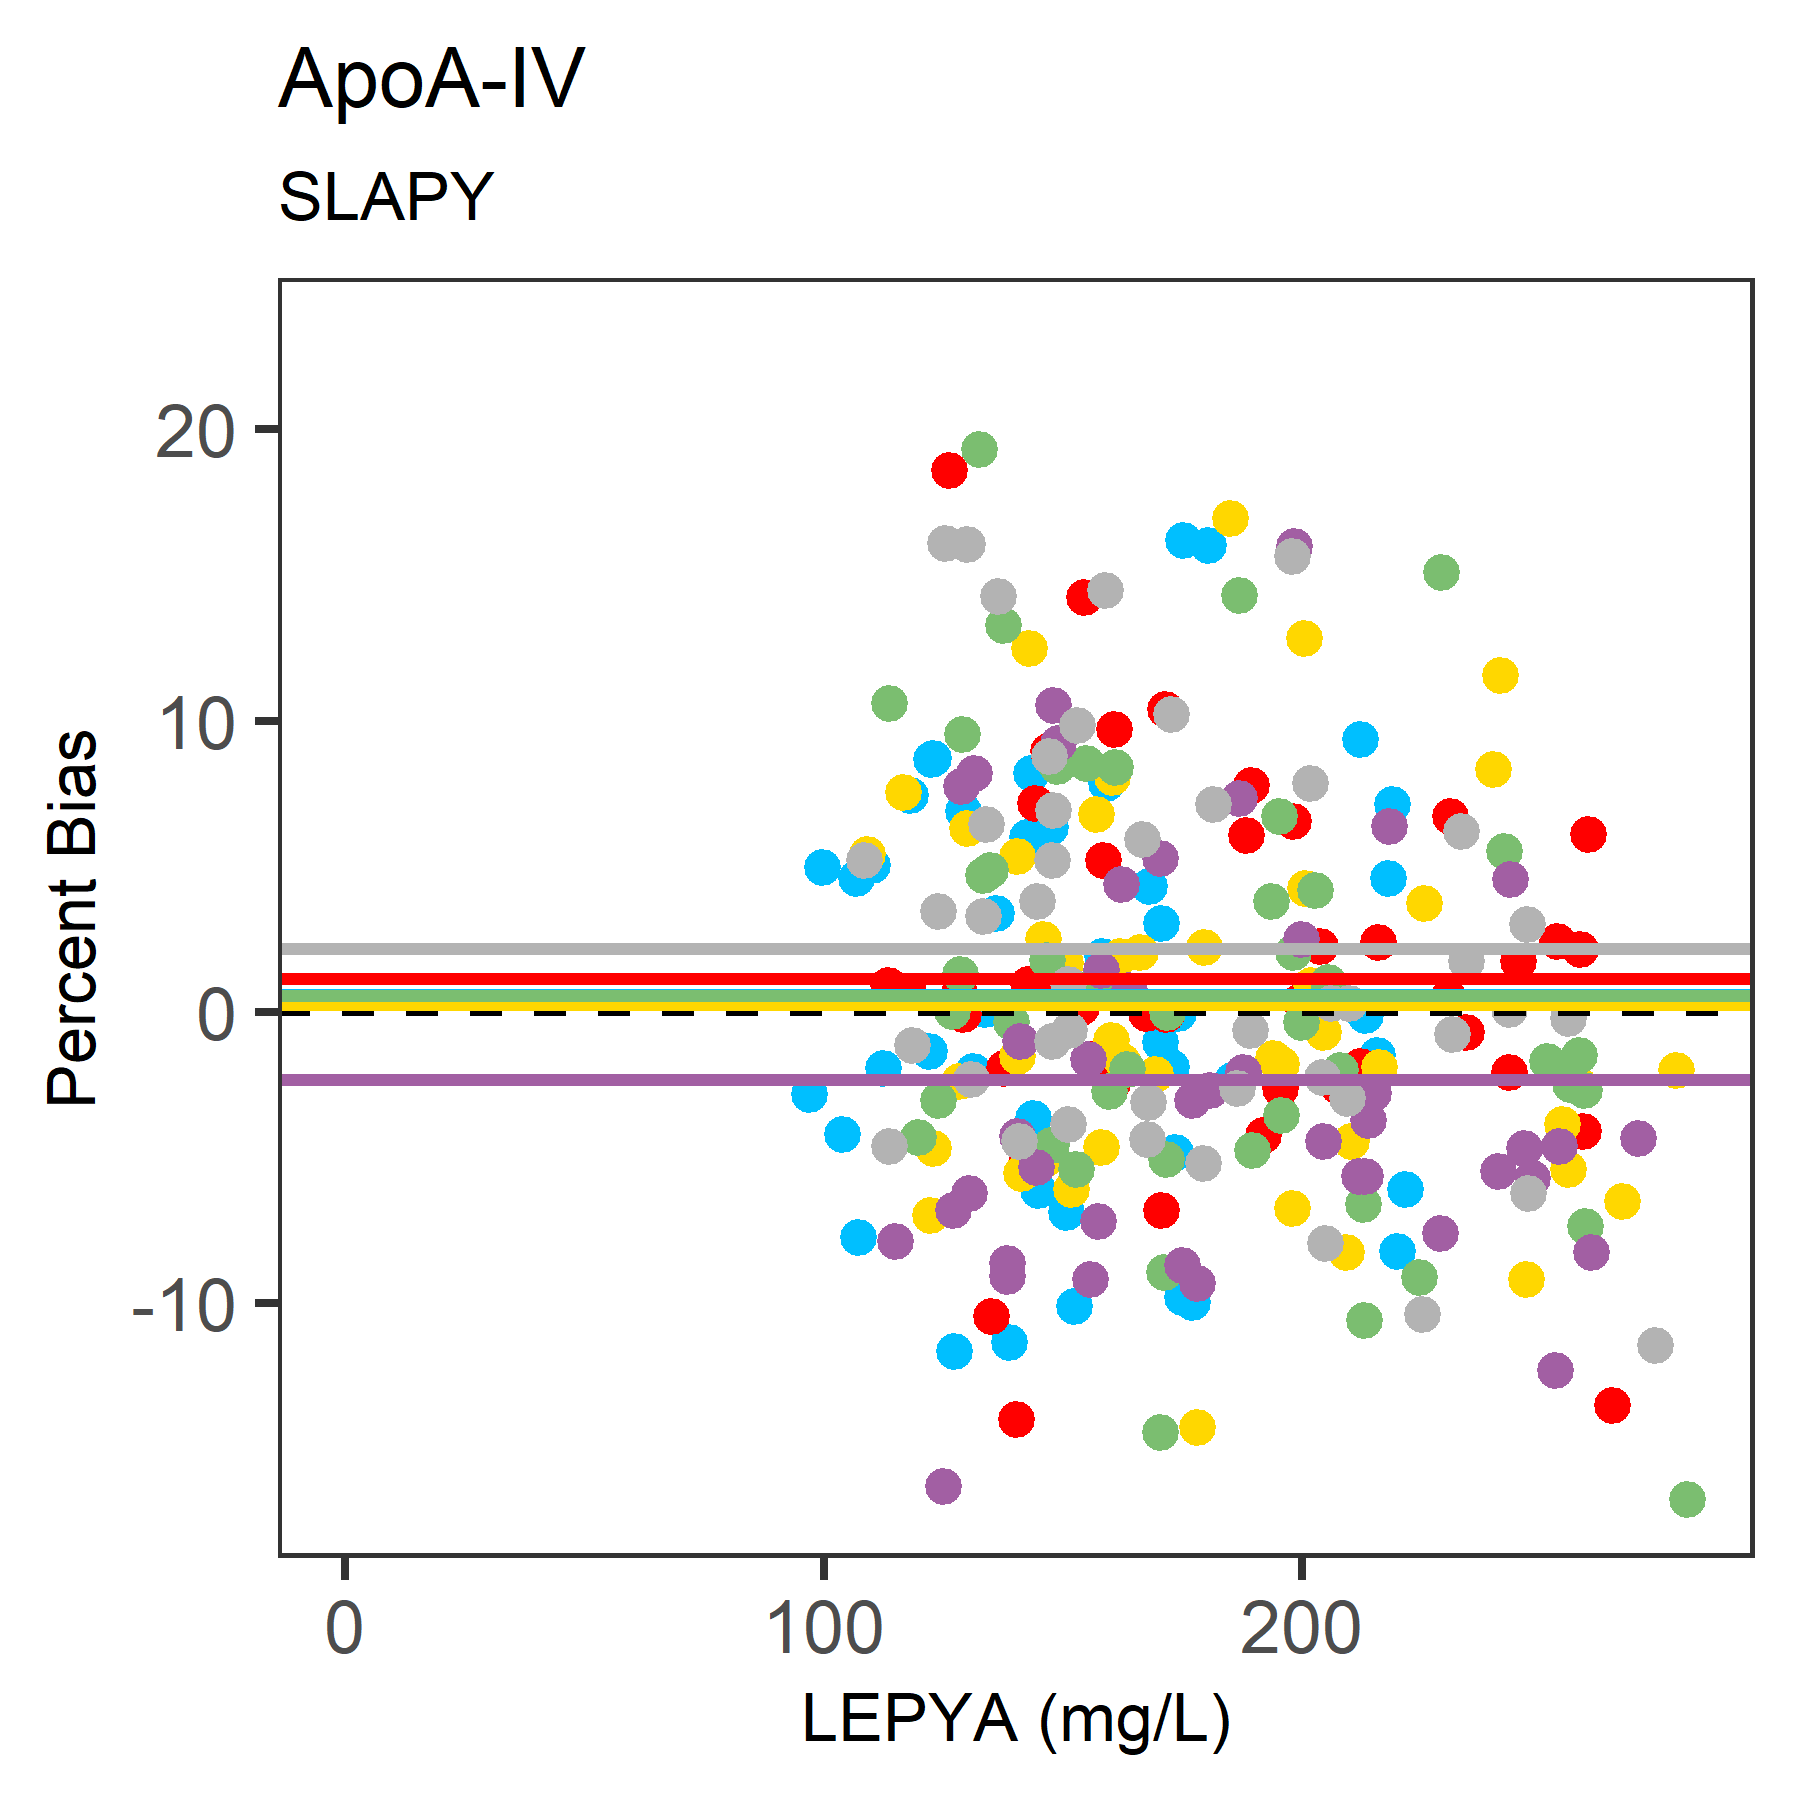

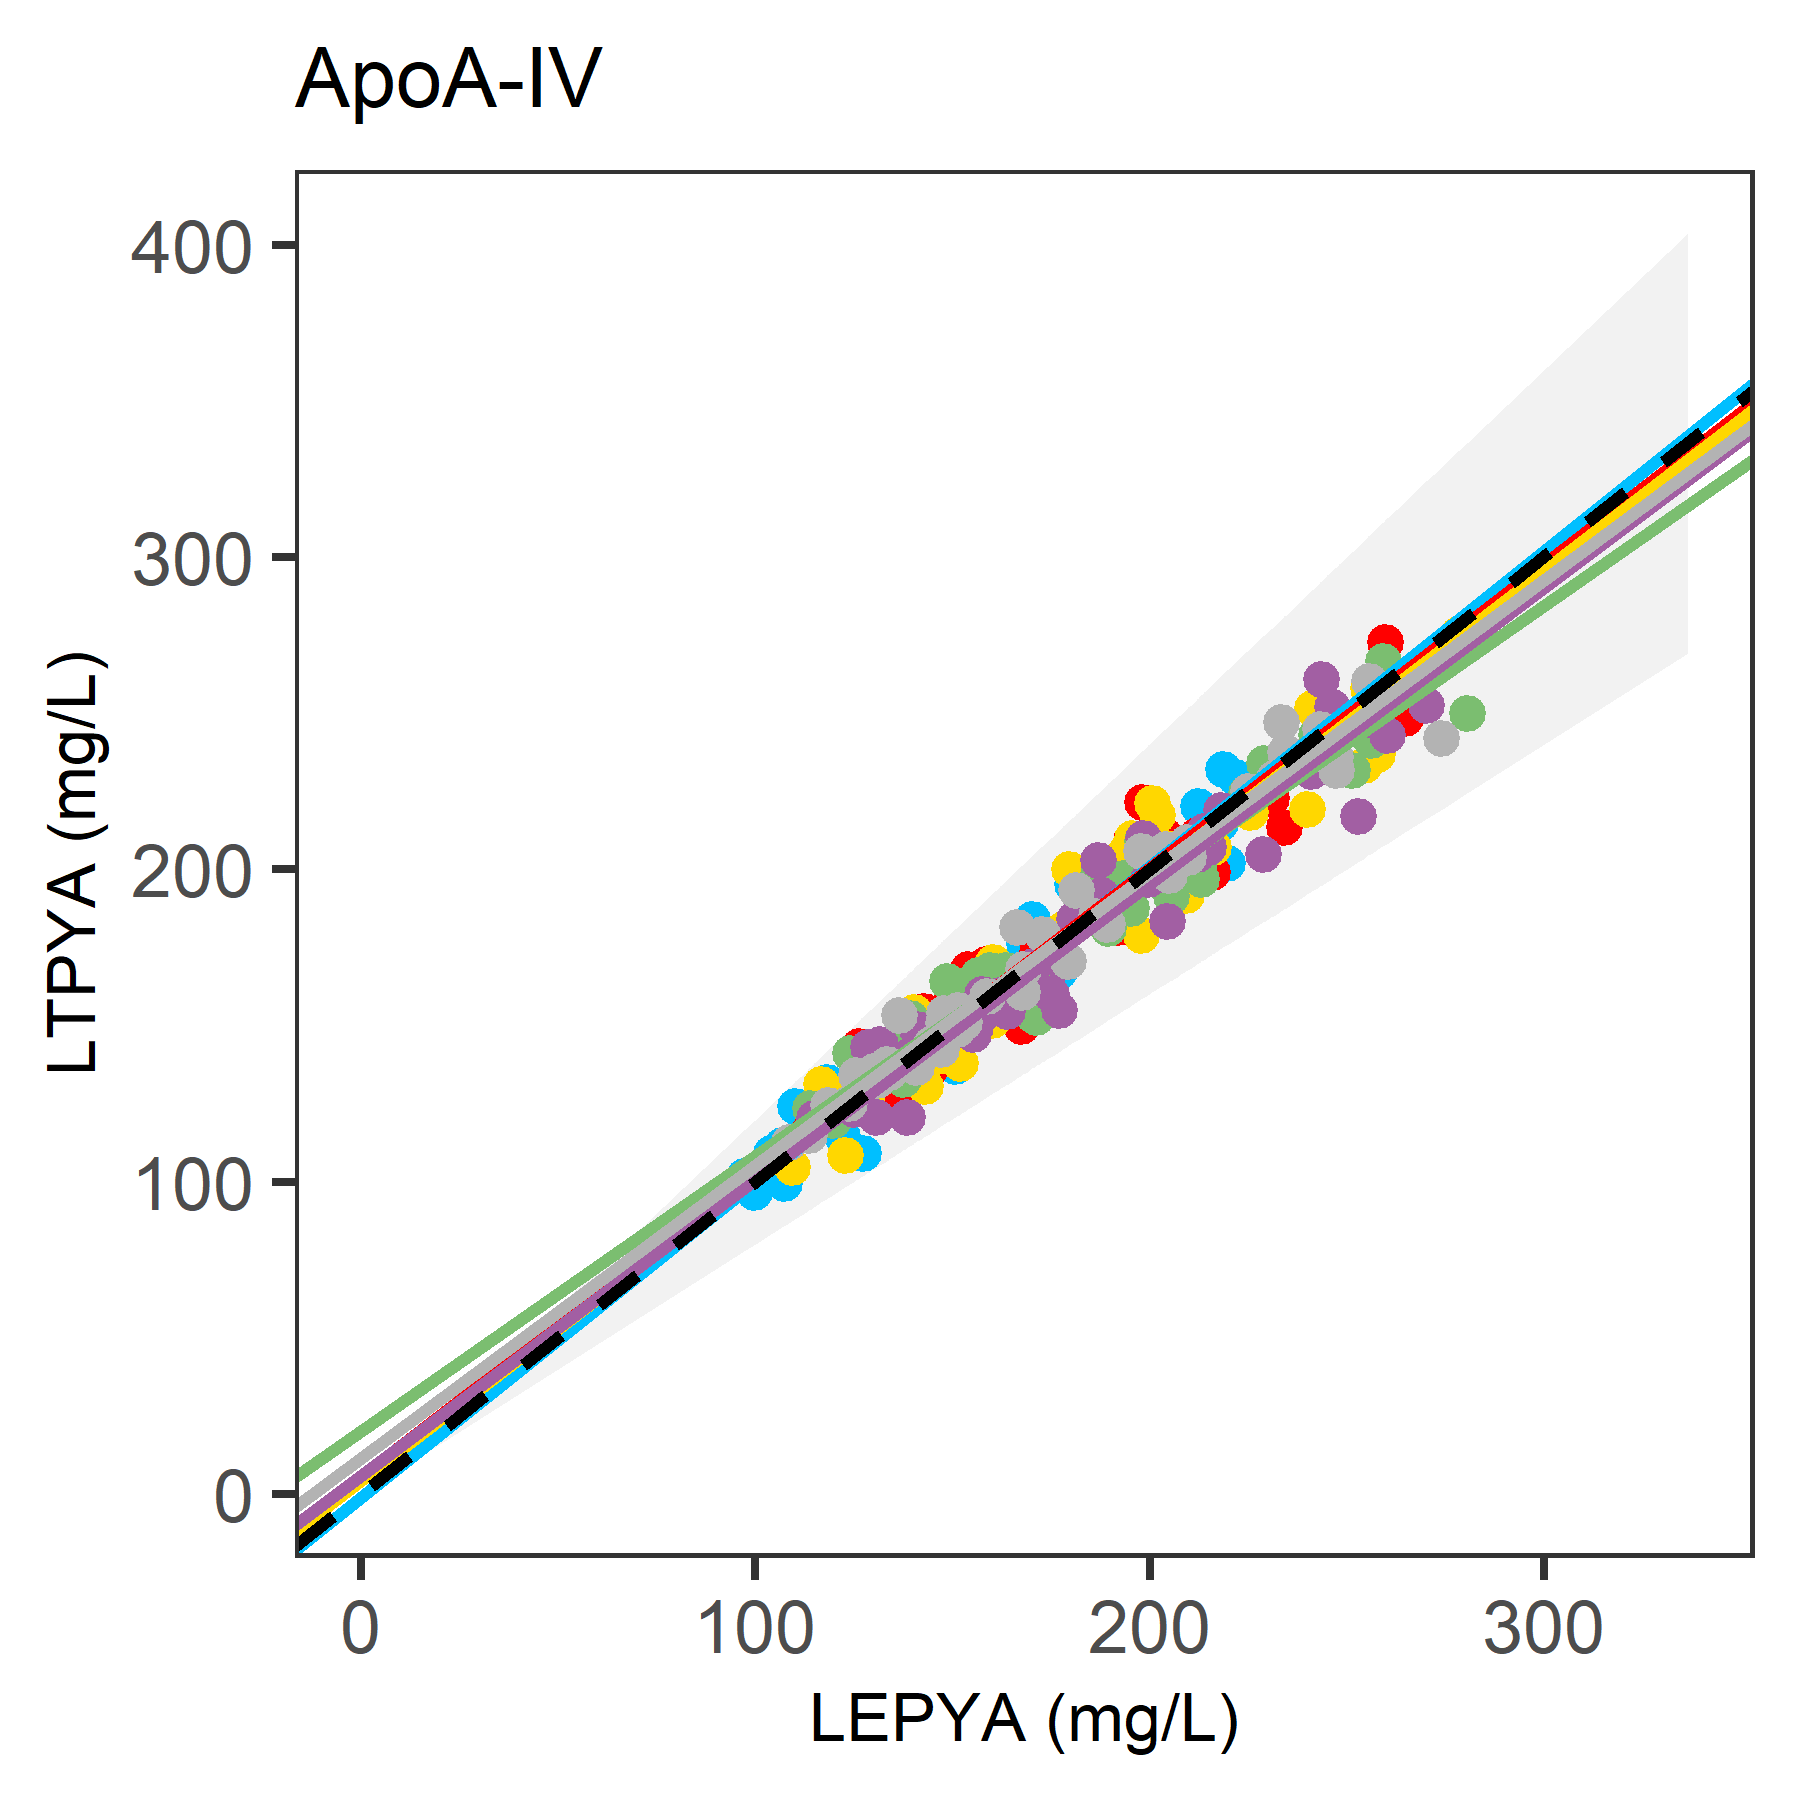

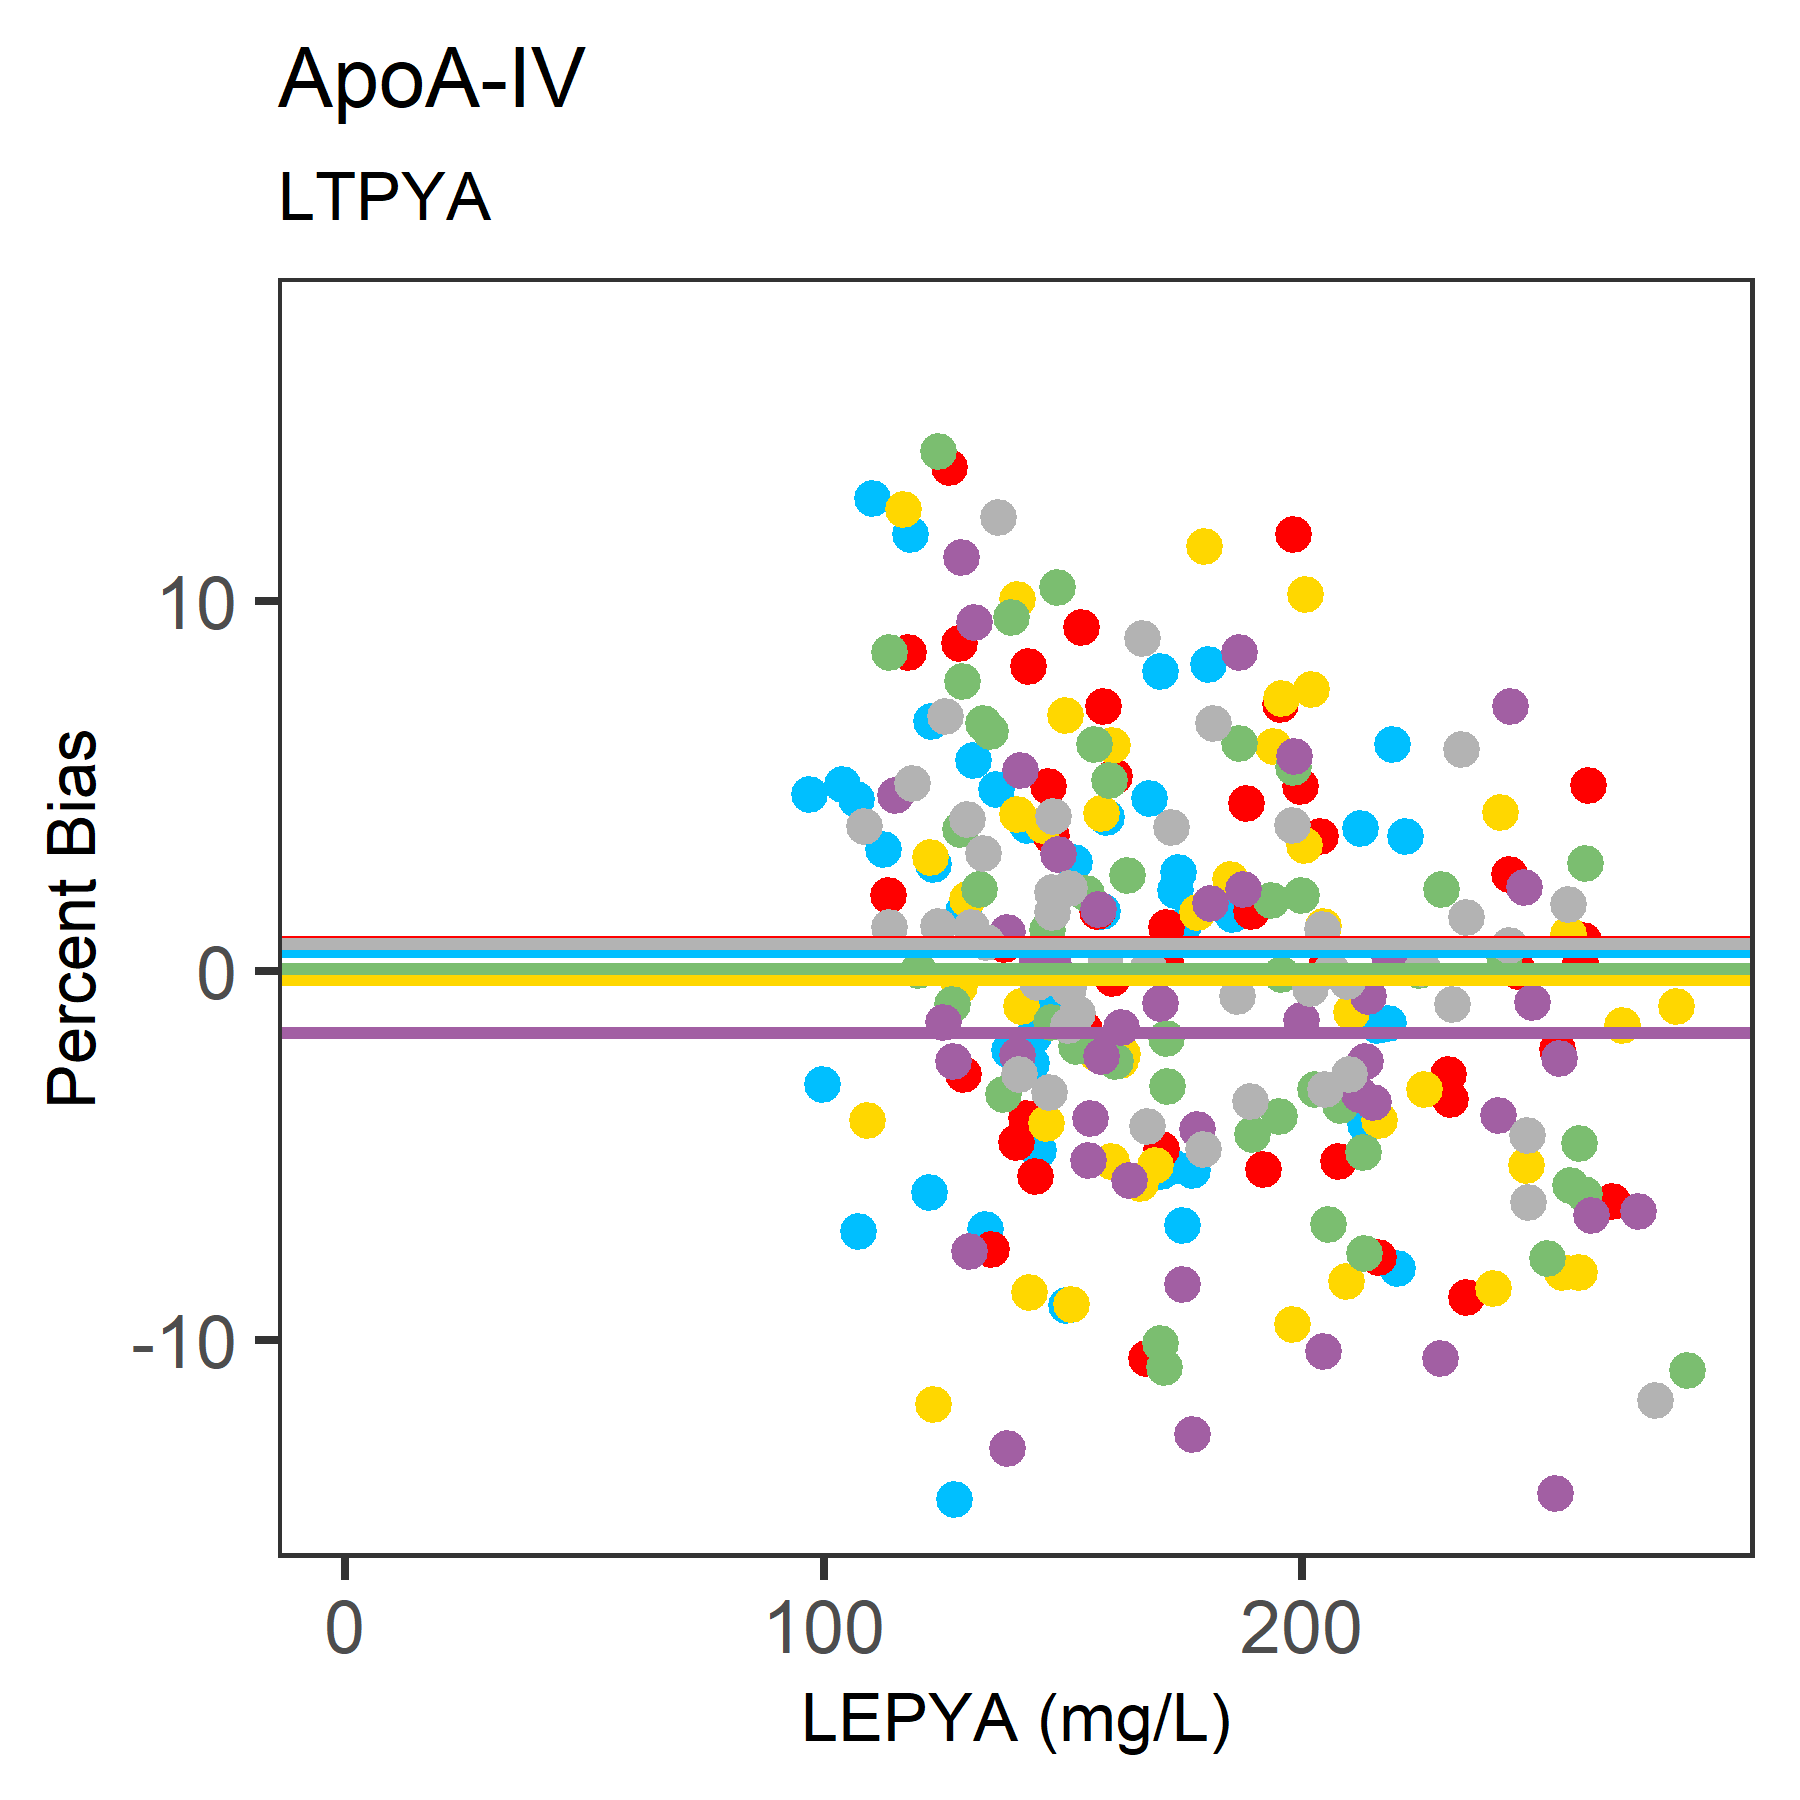

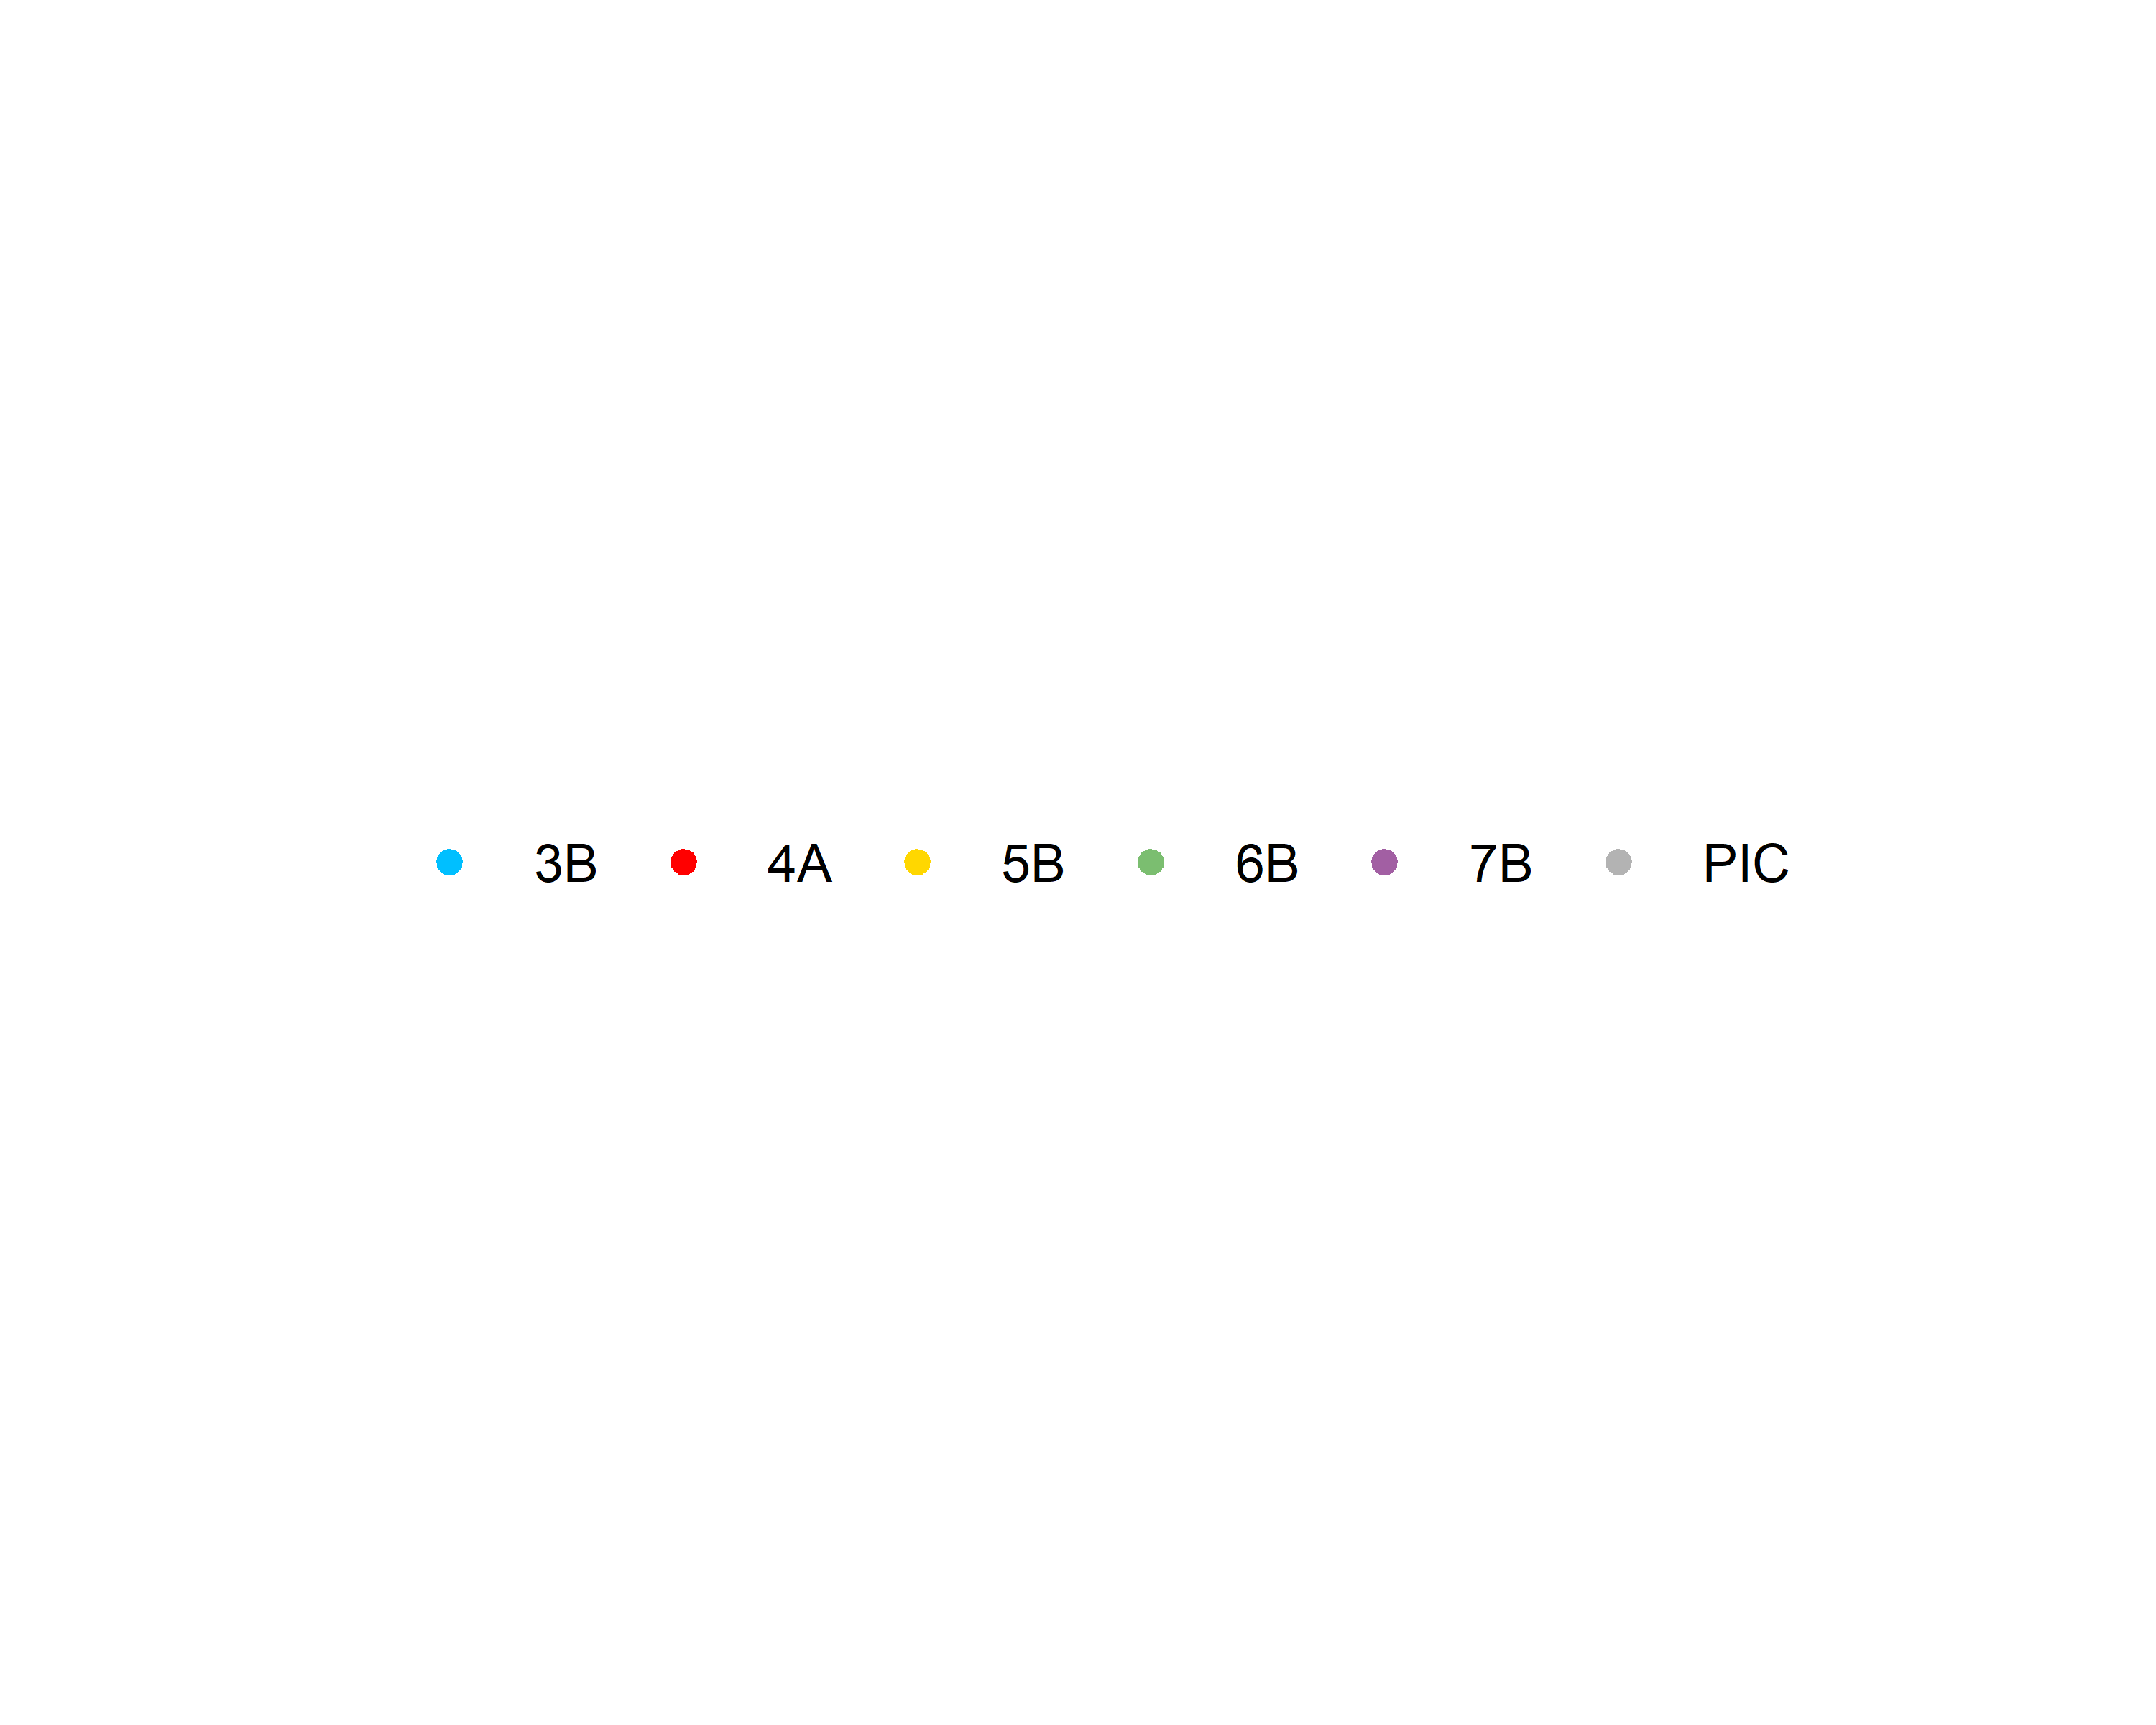


S1(B)


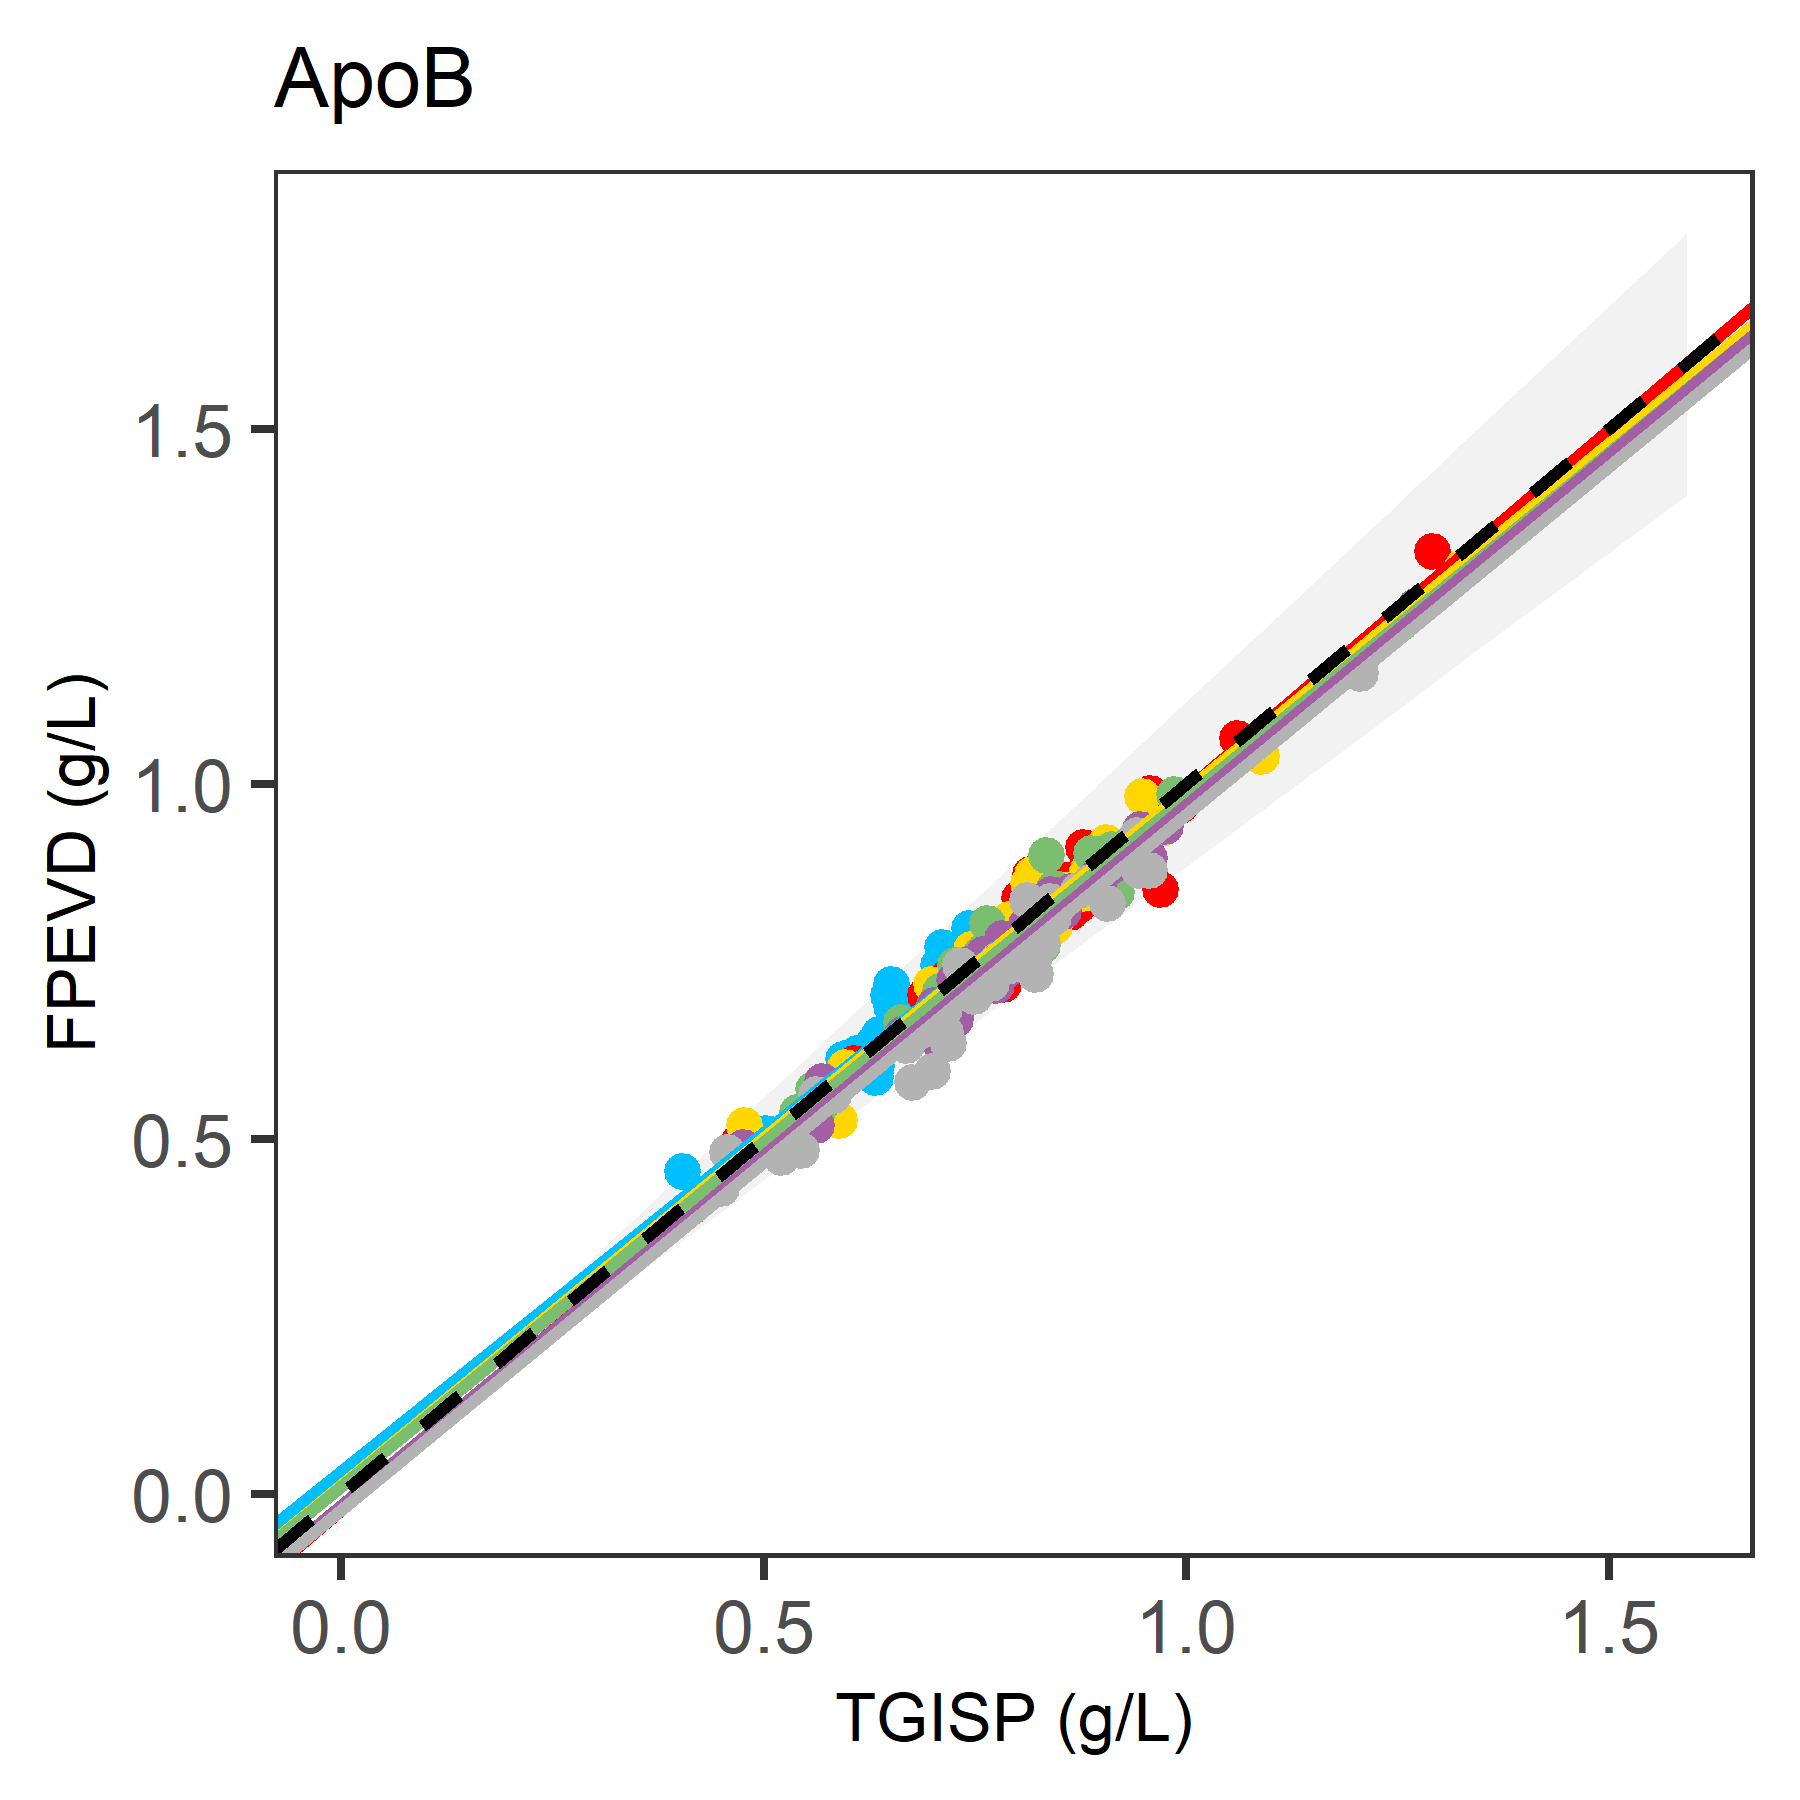

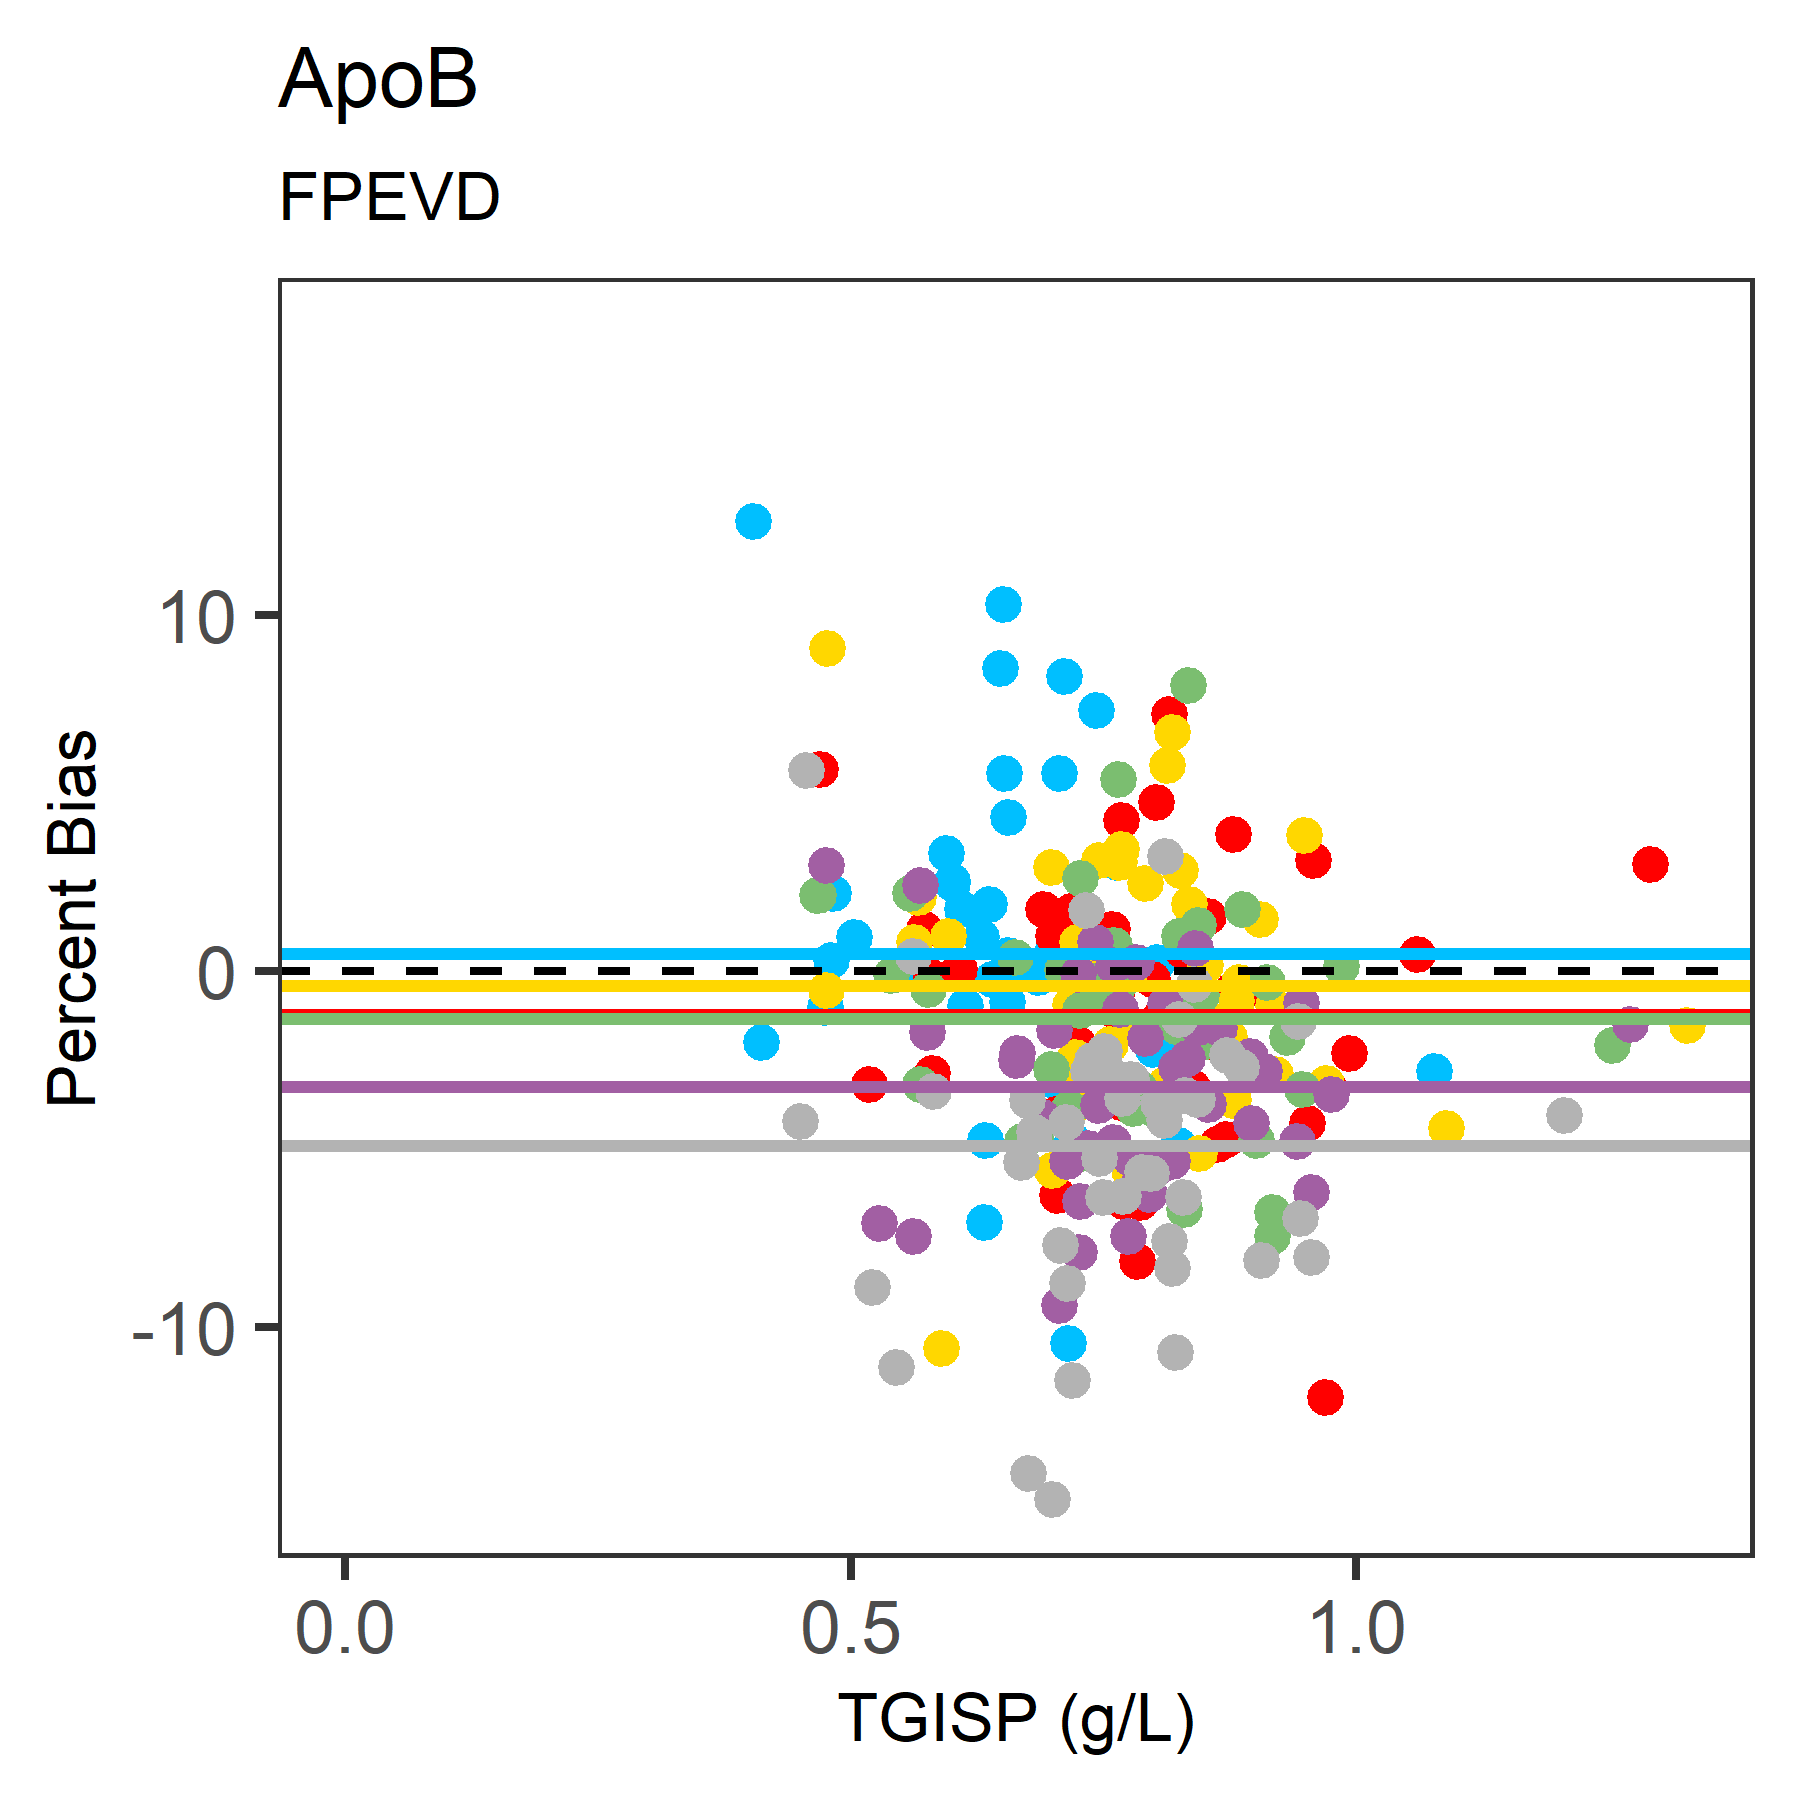

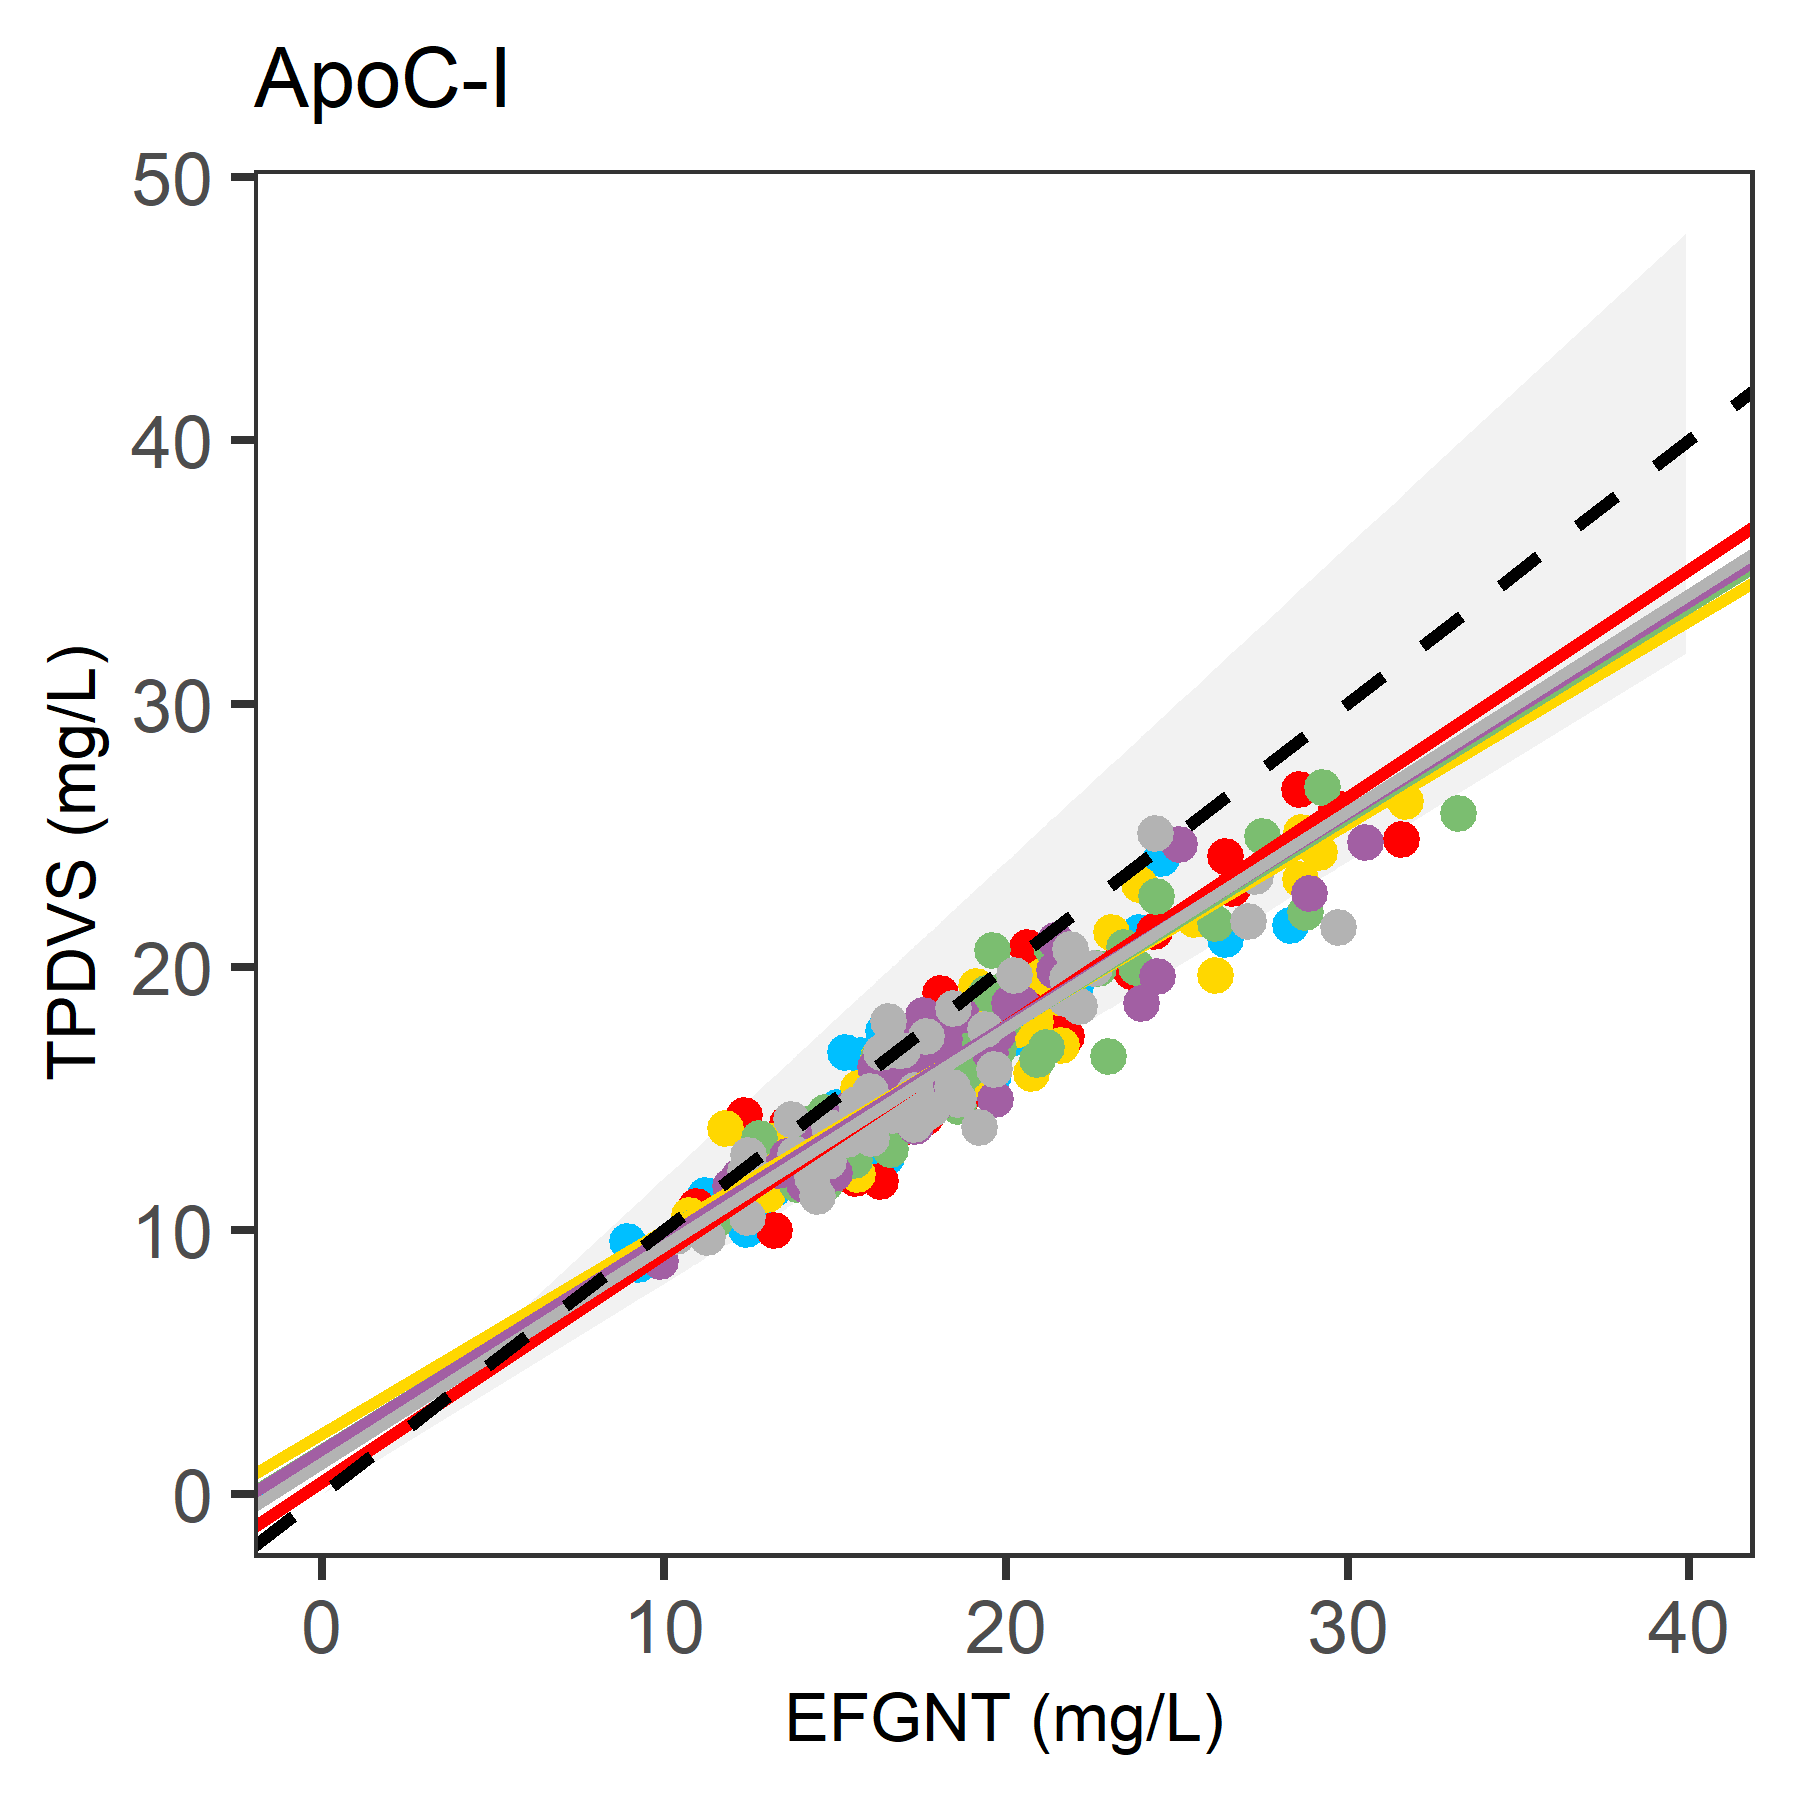

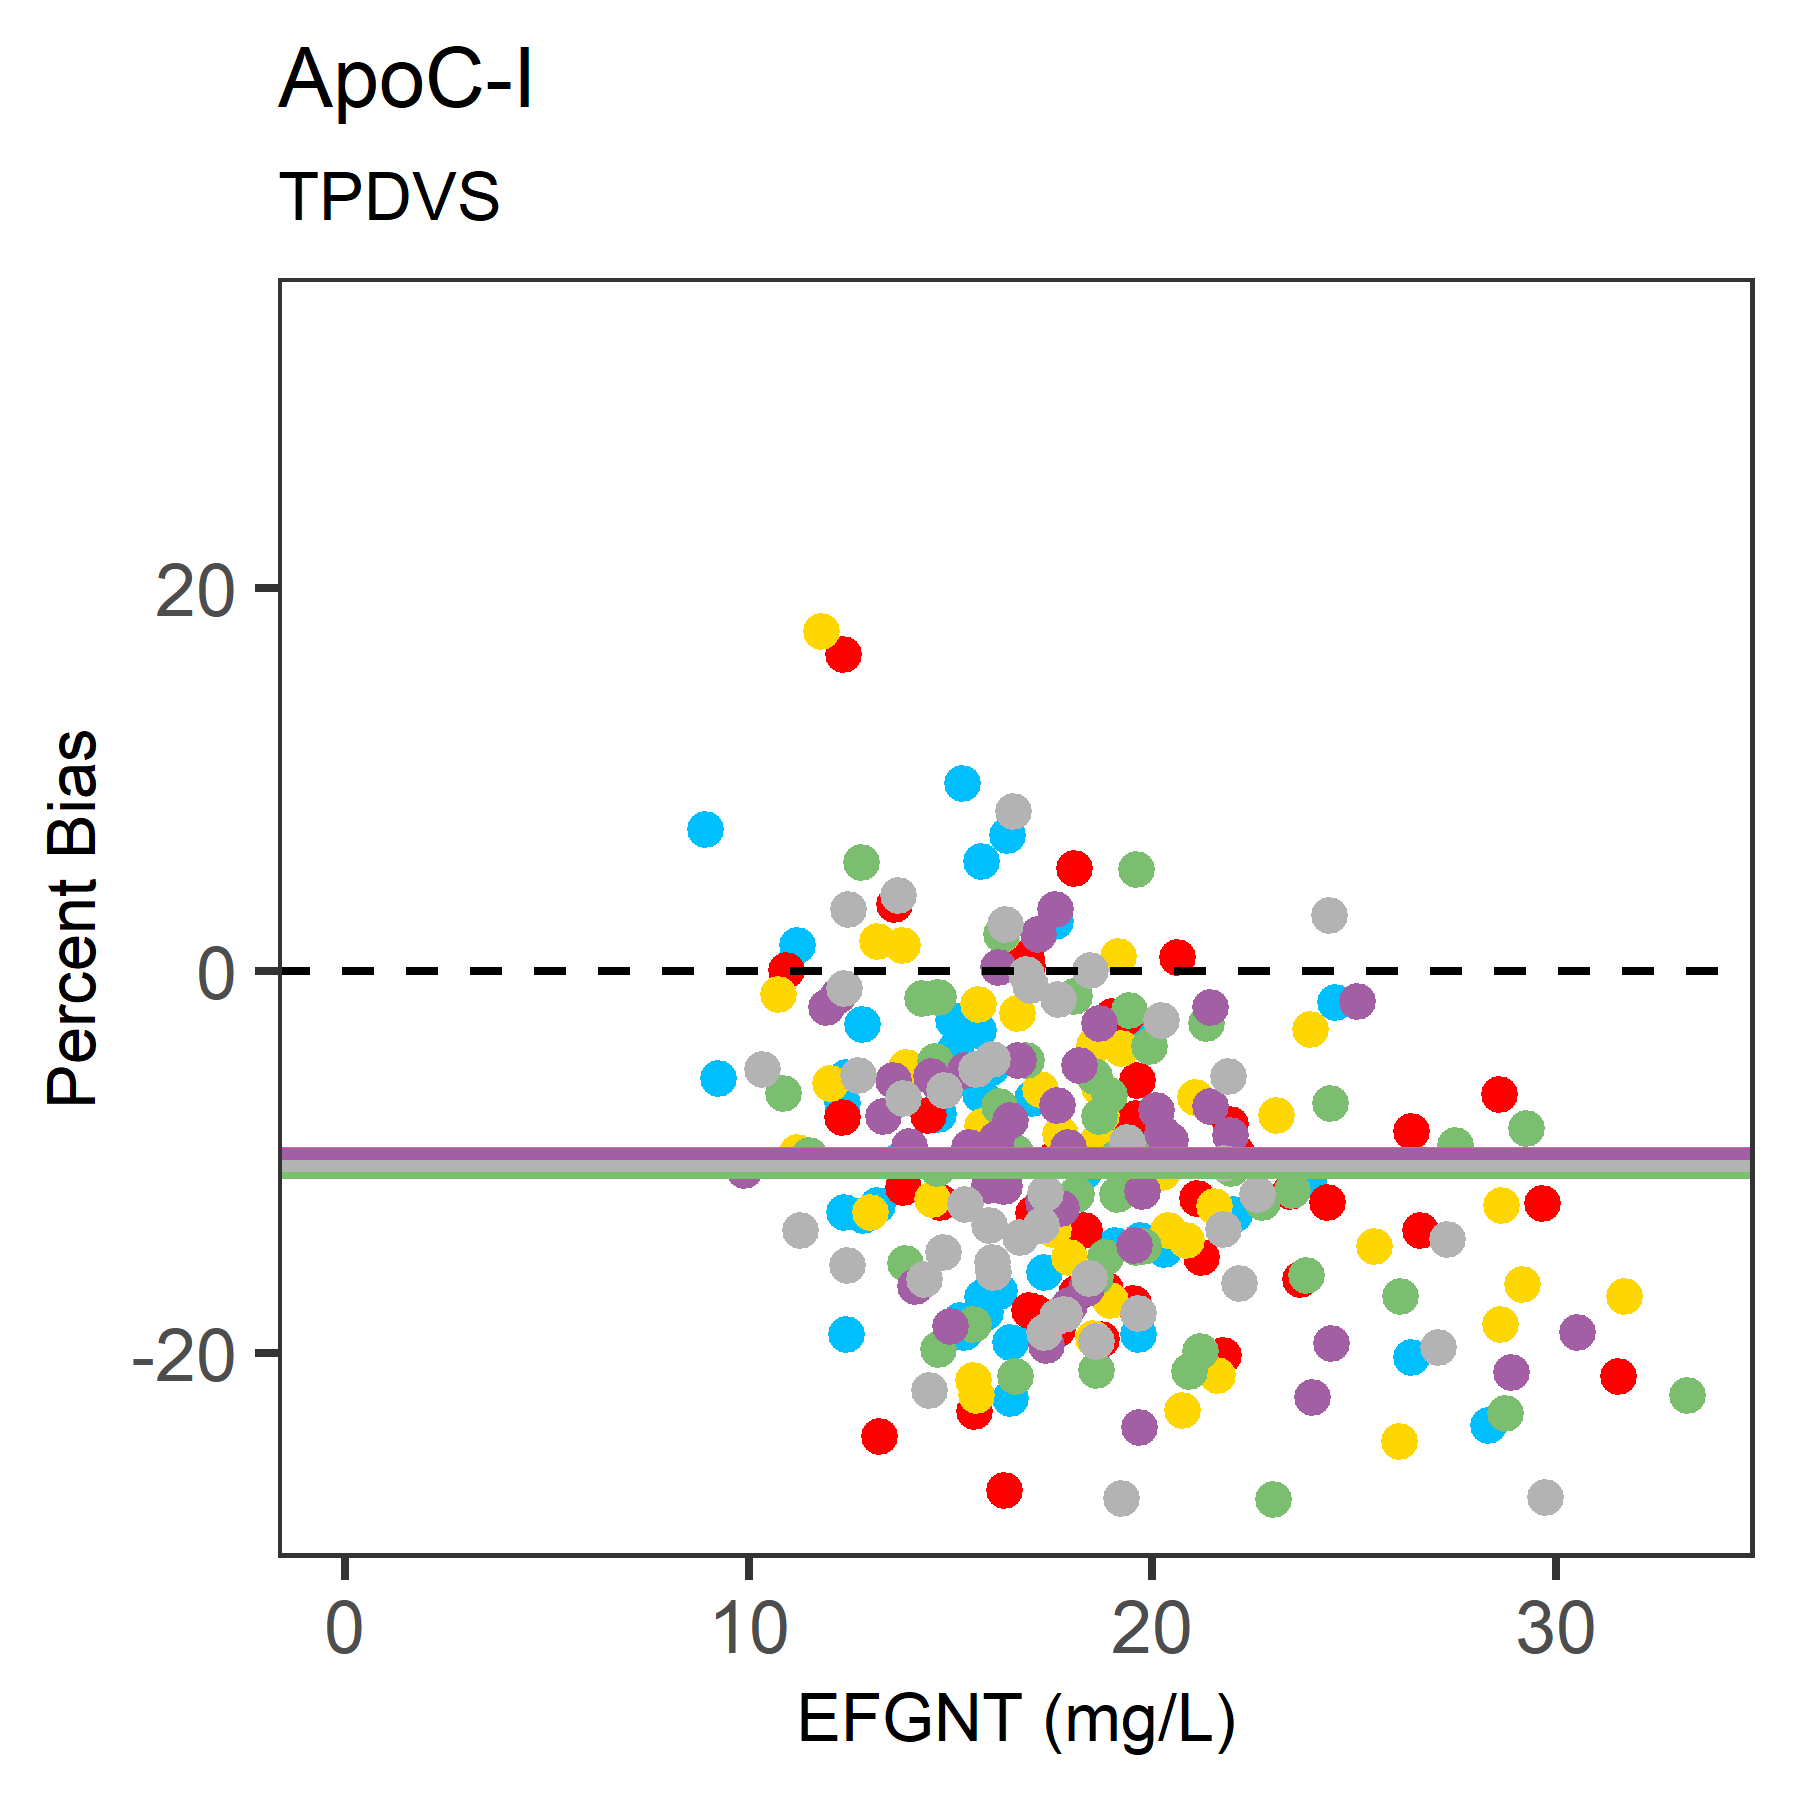

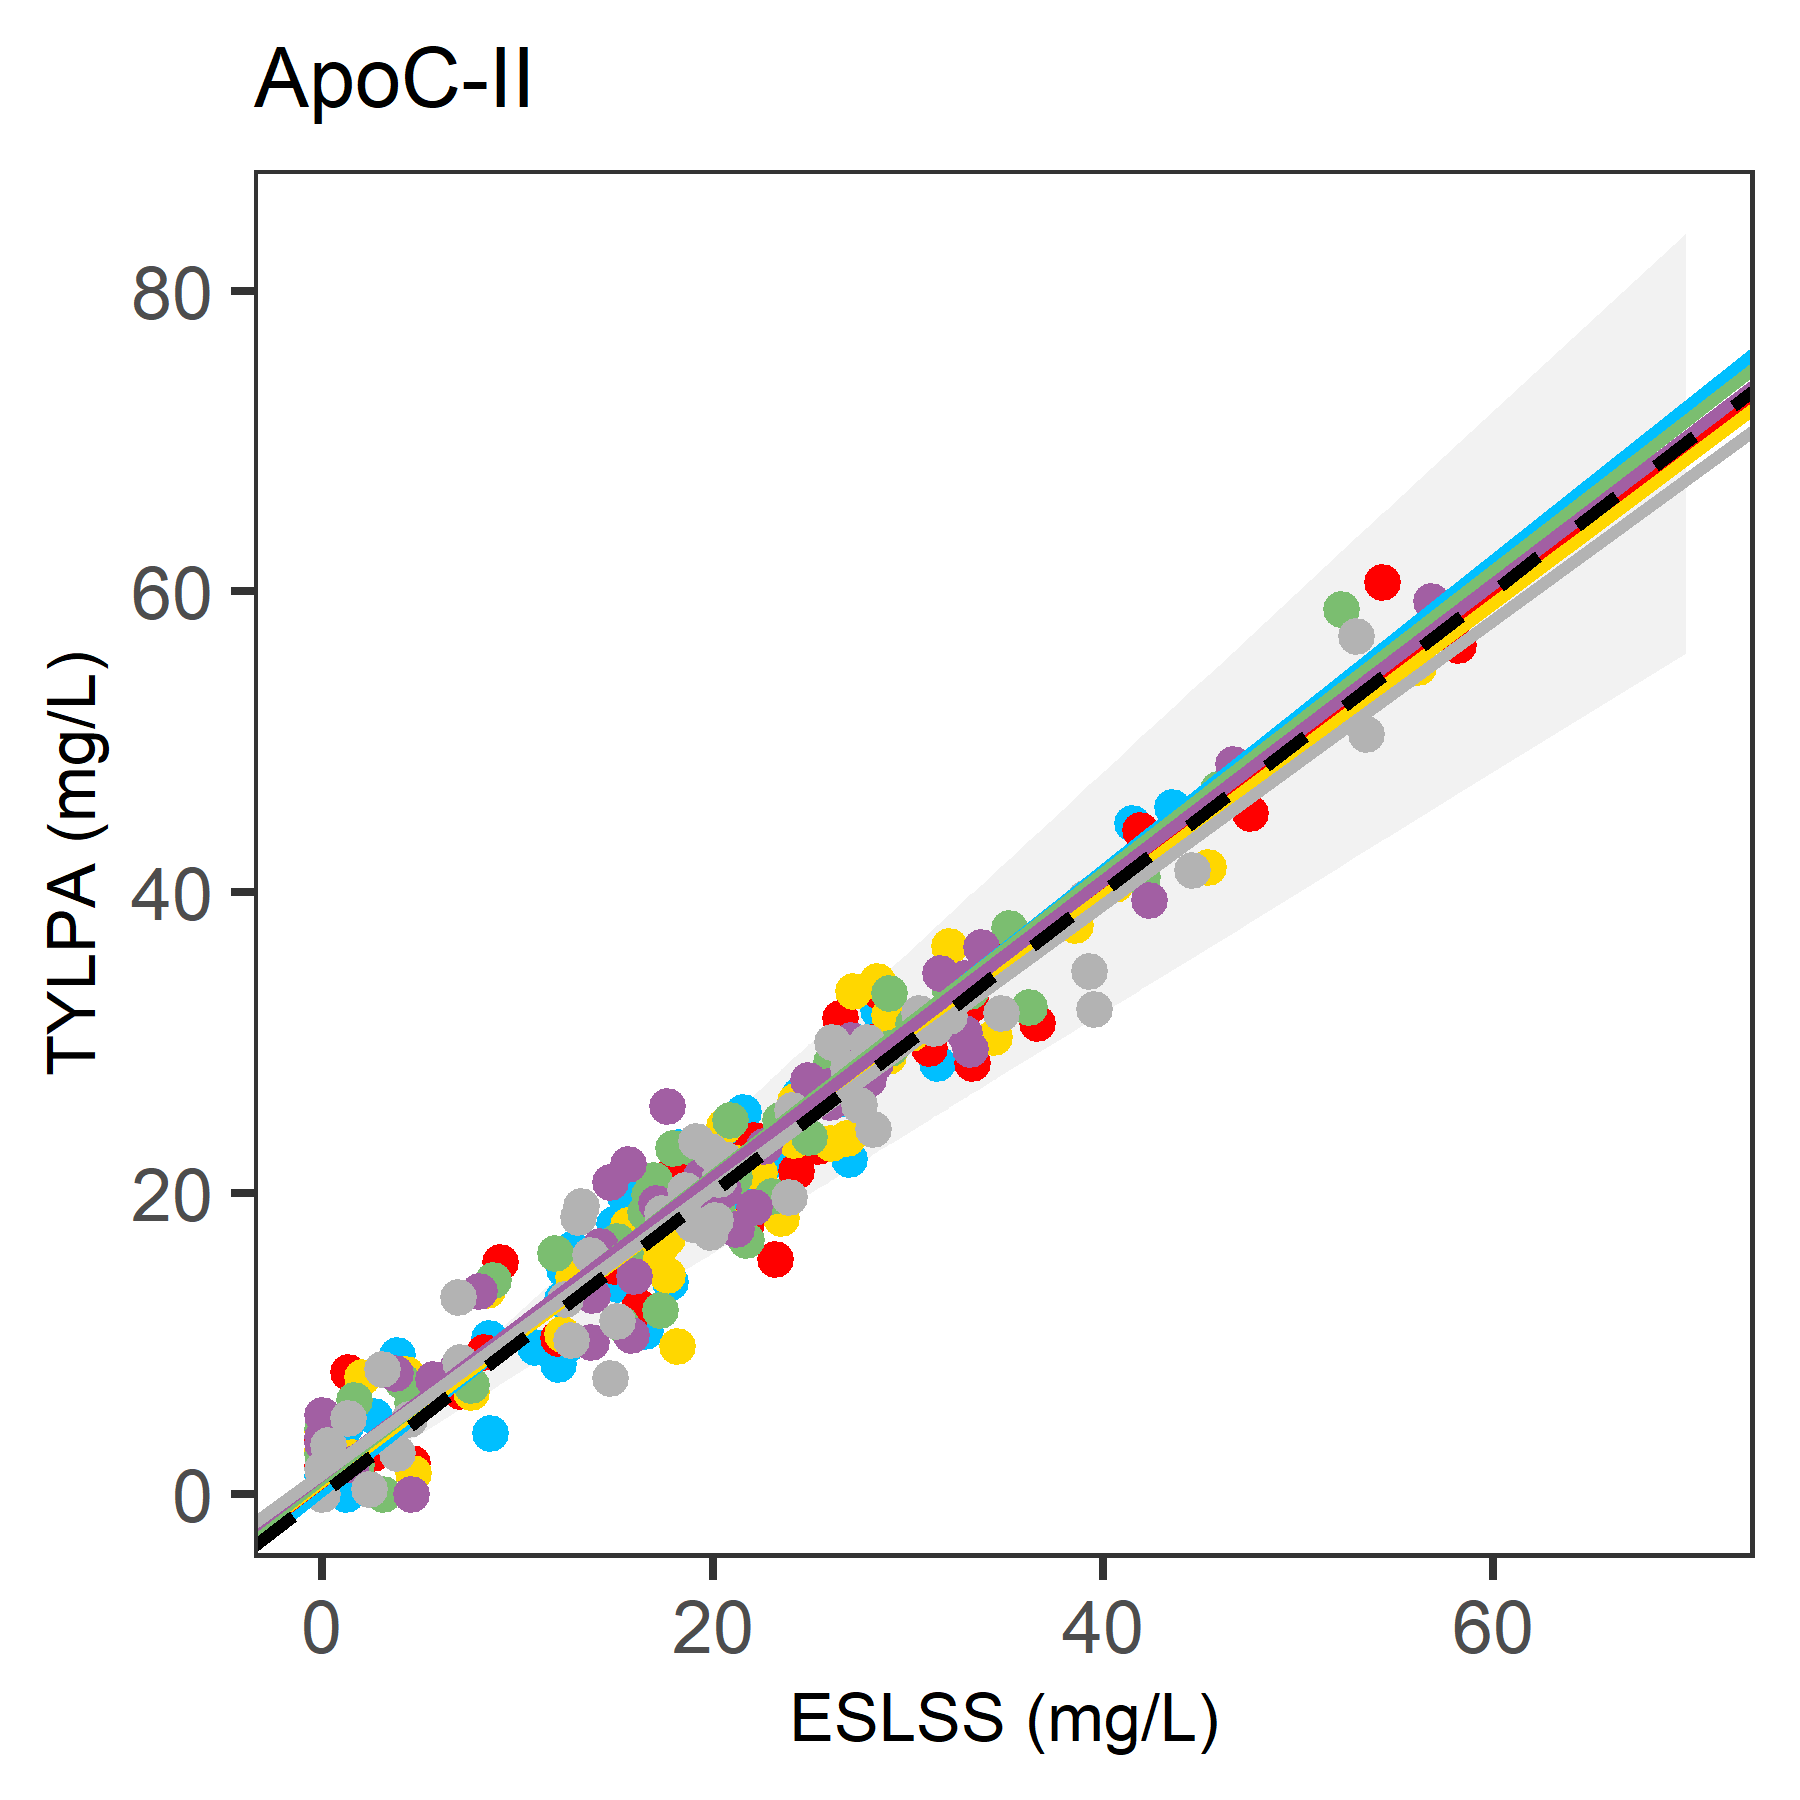

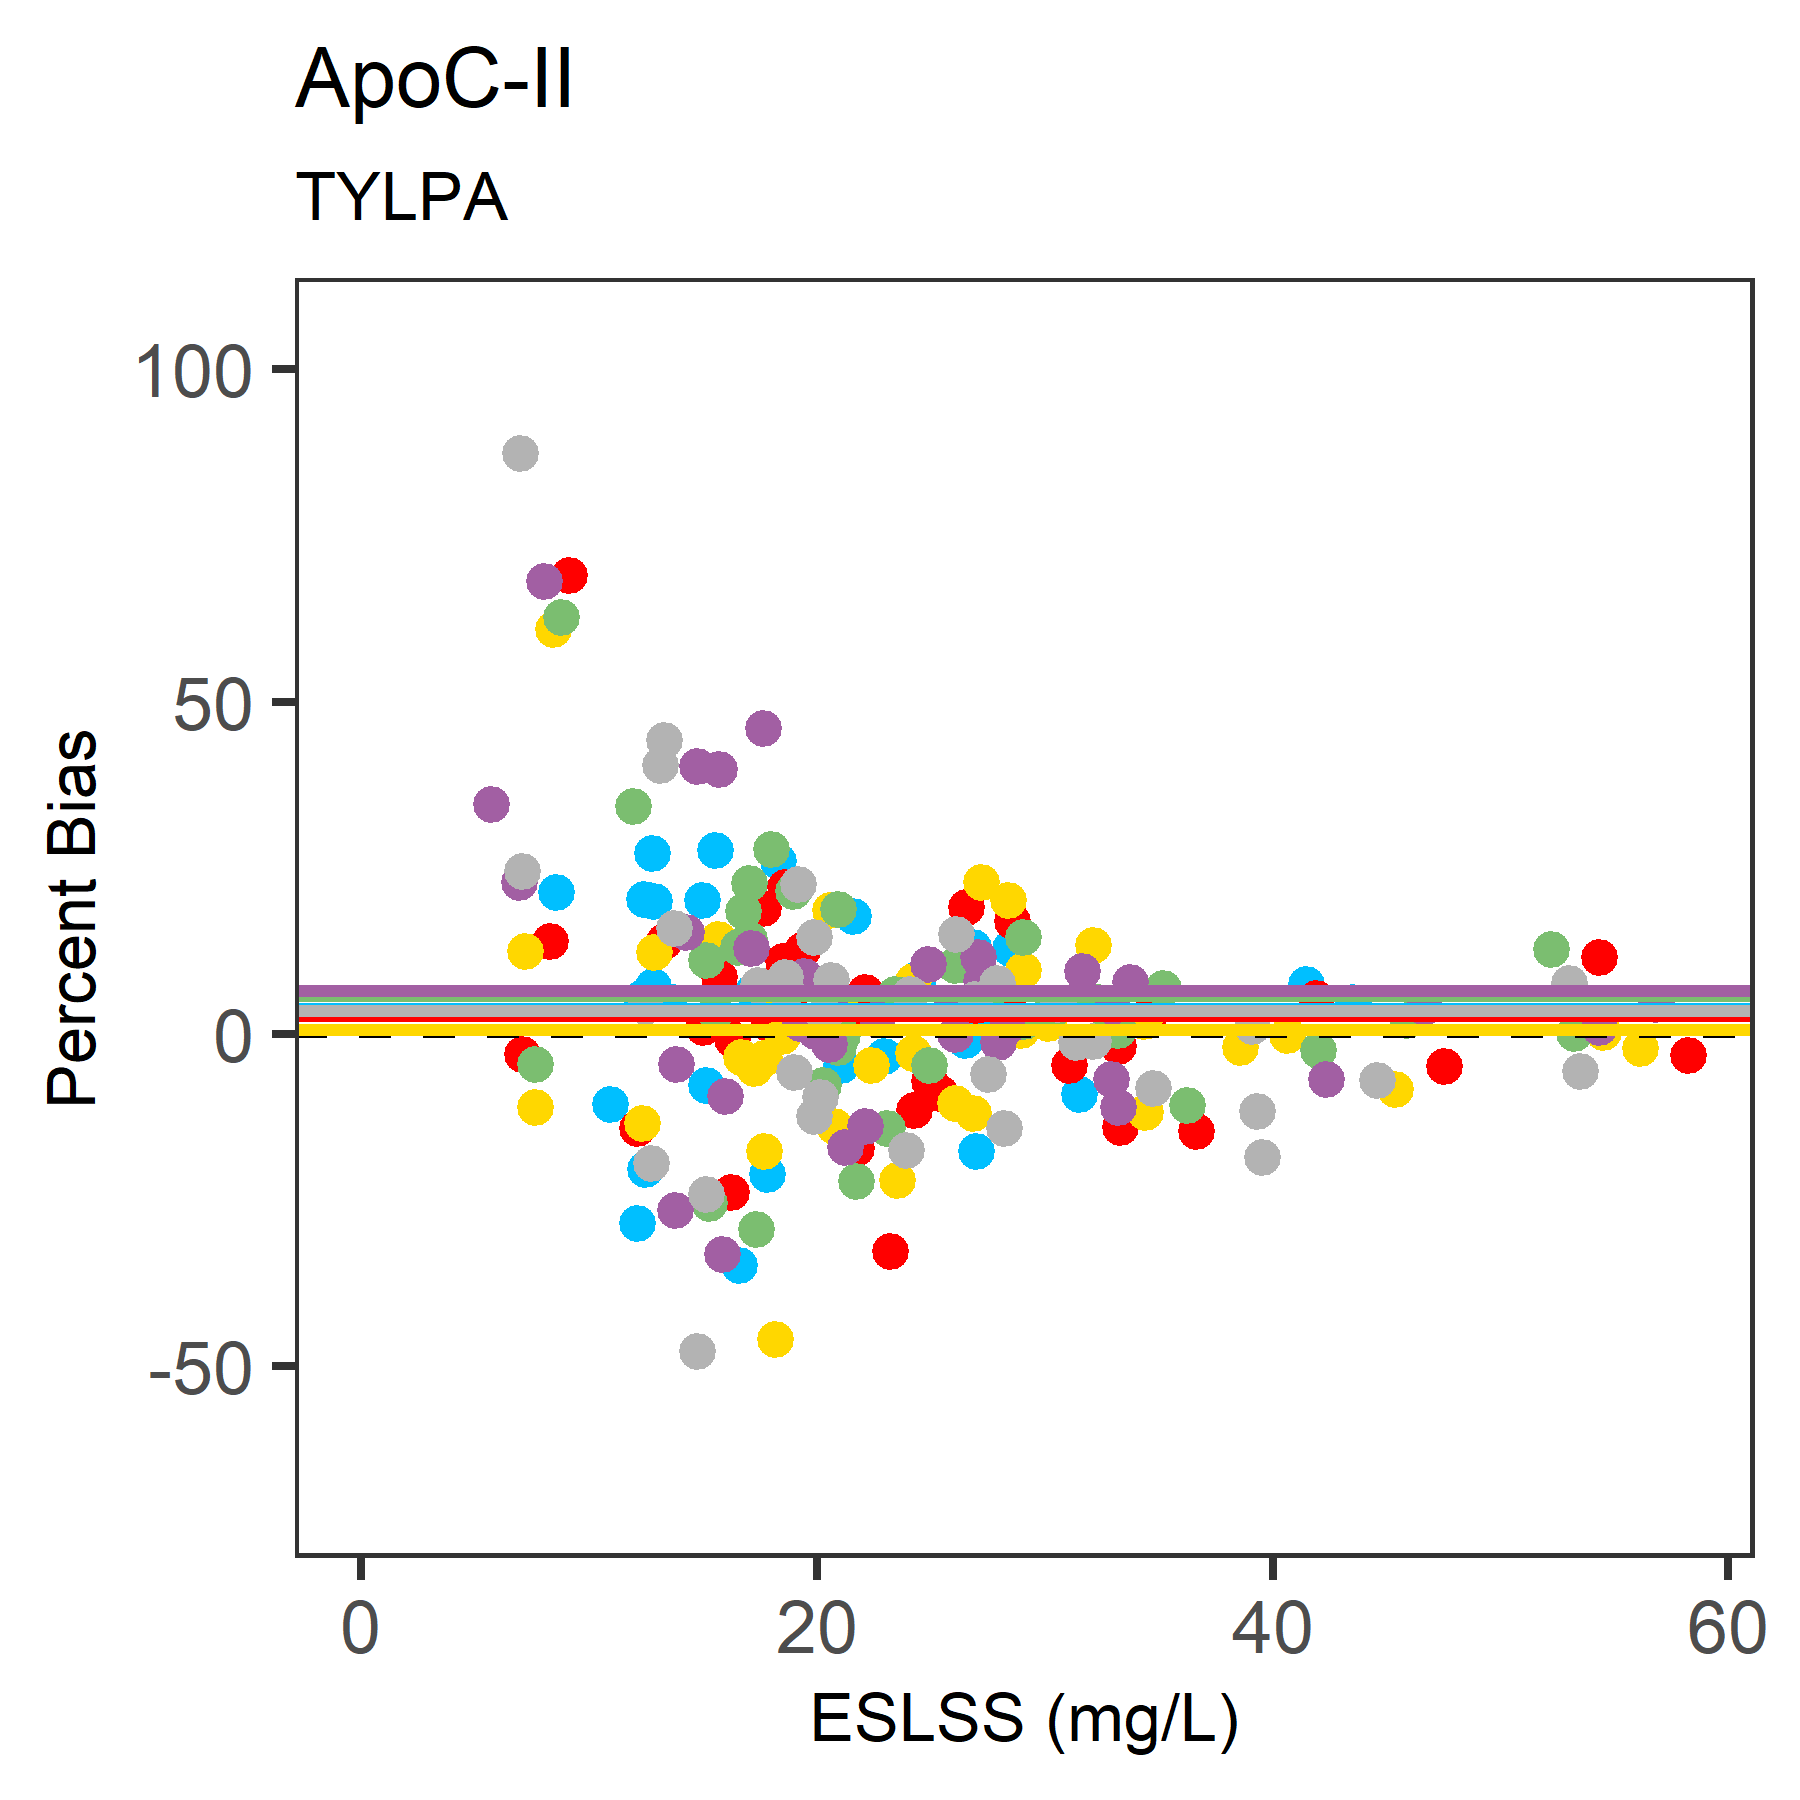

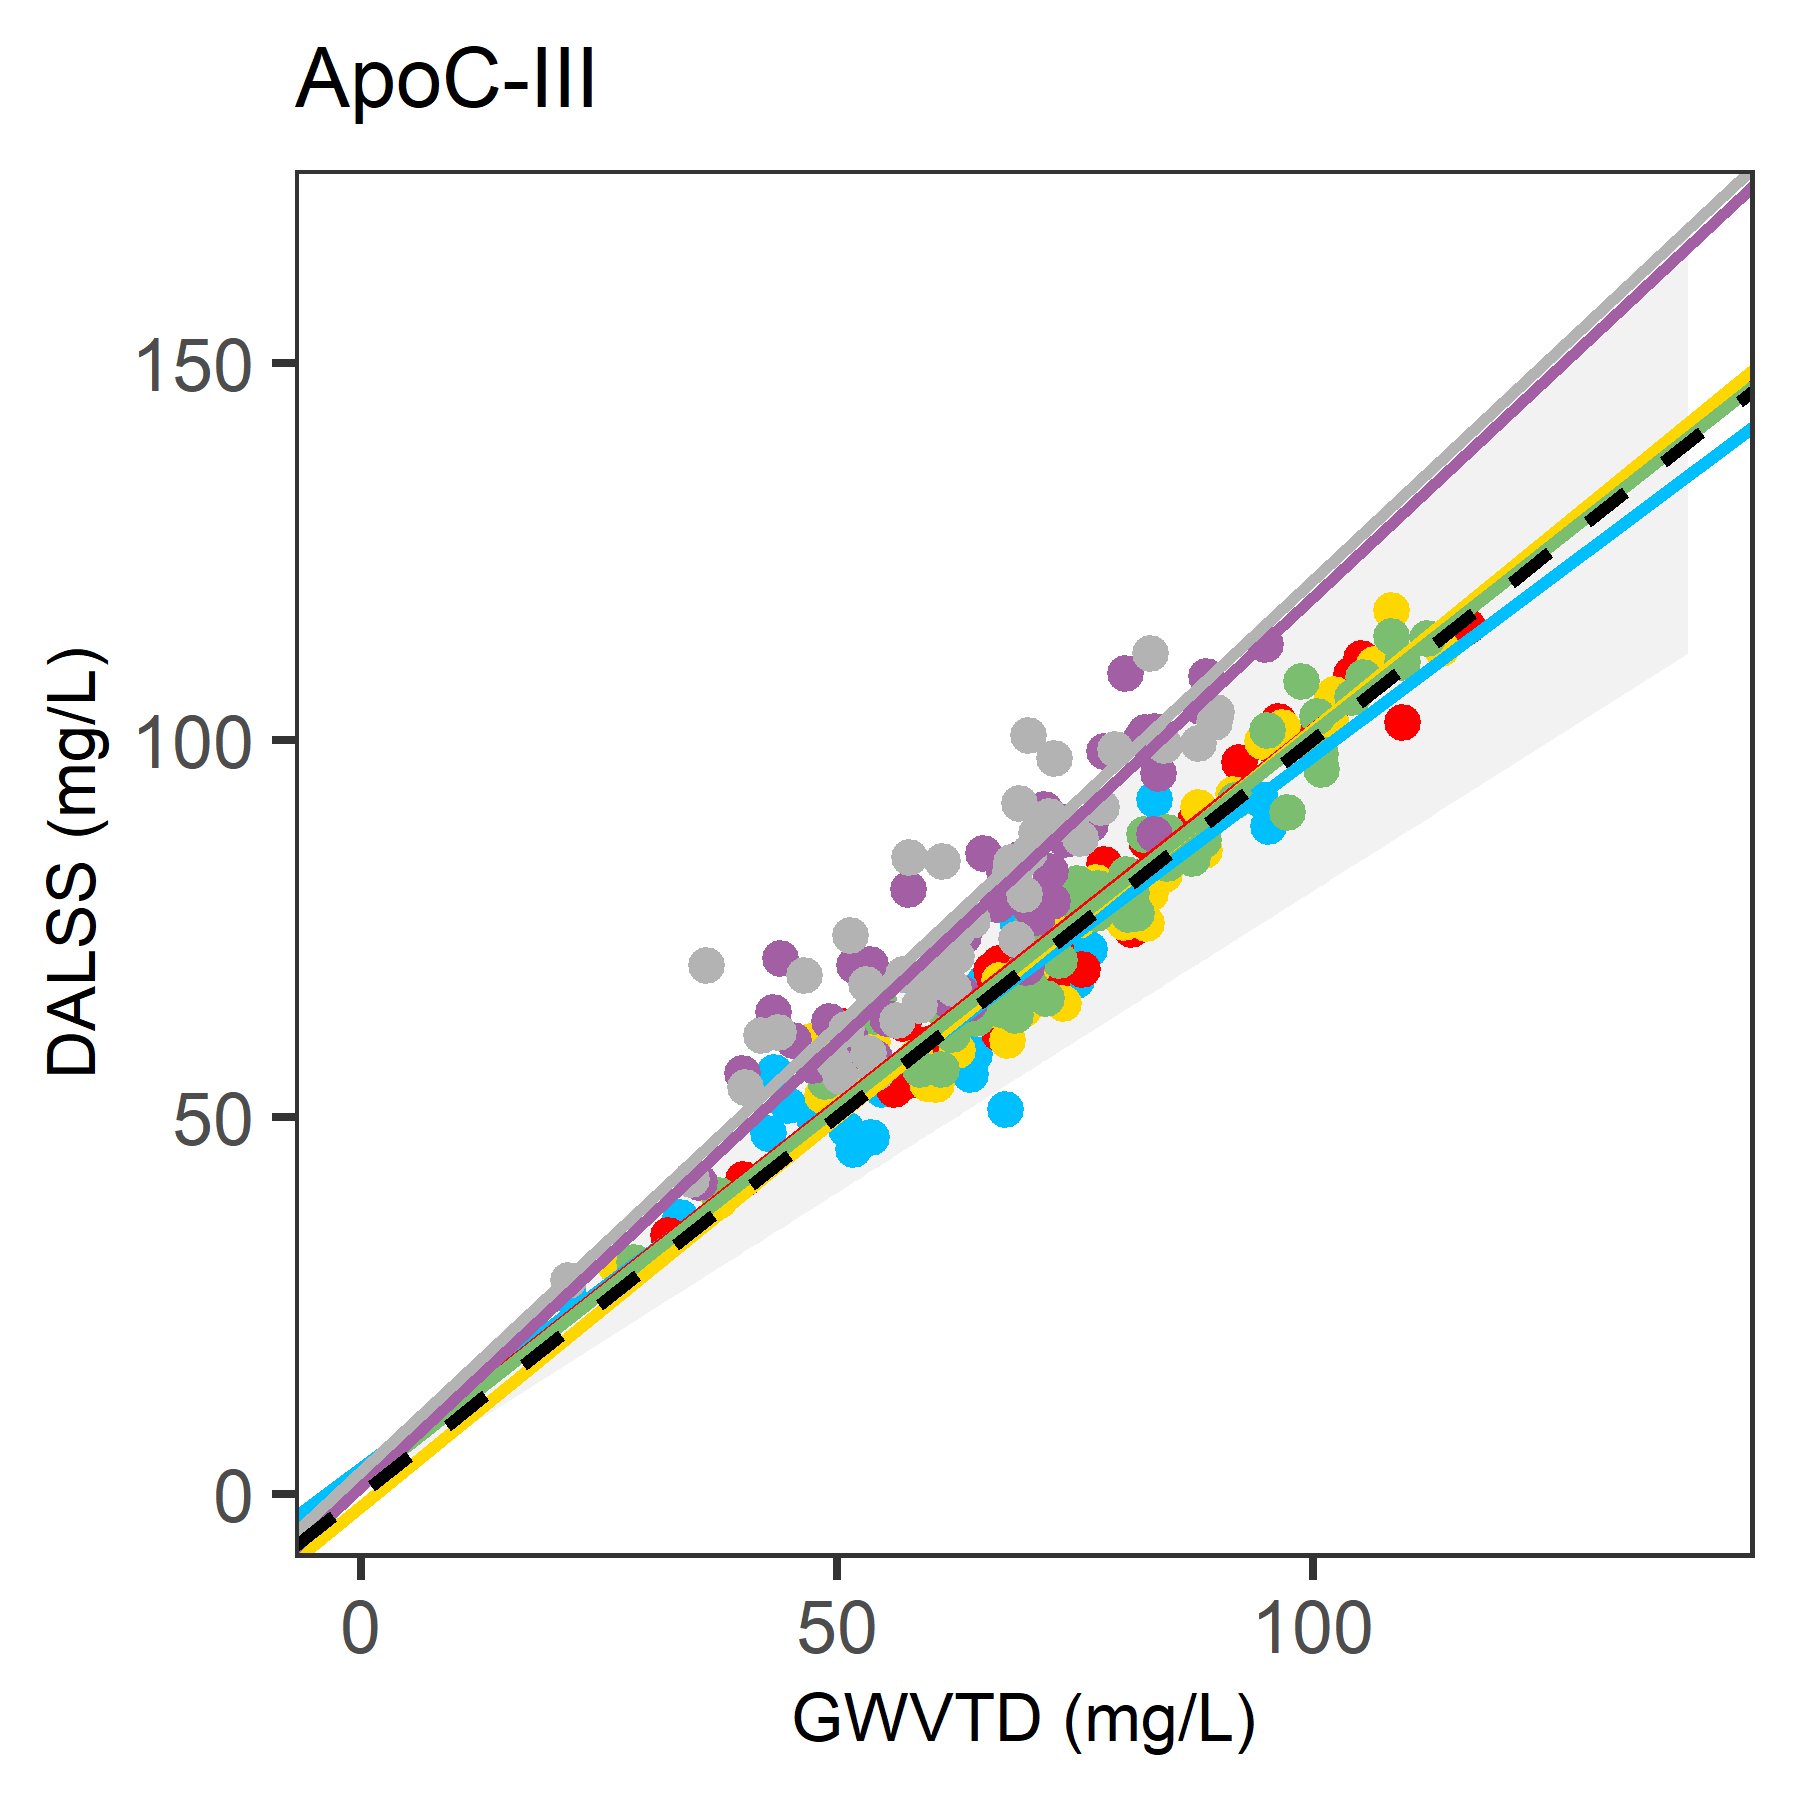

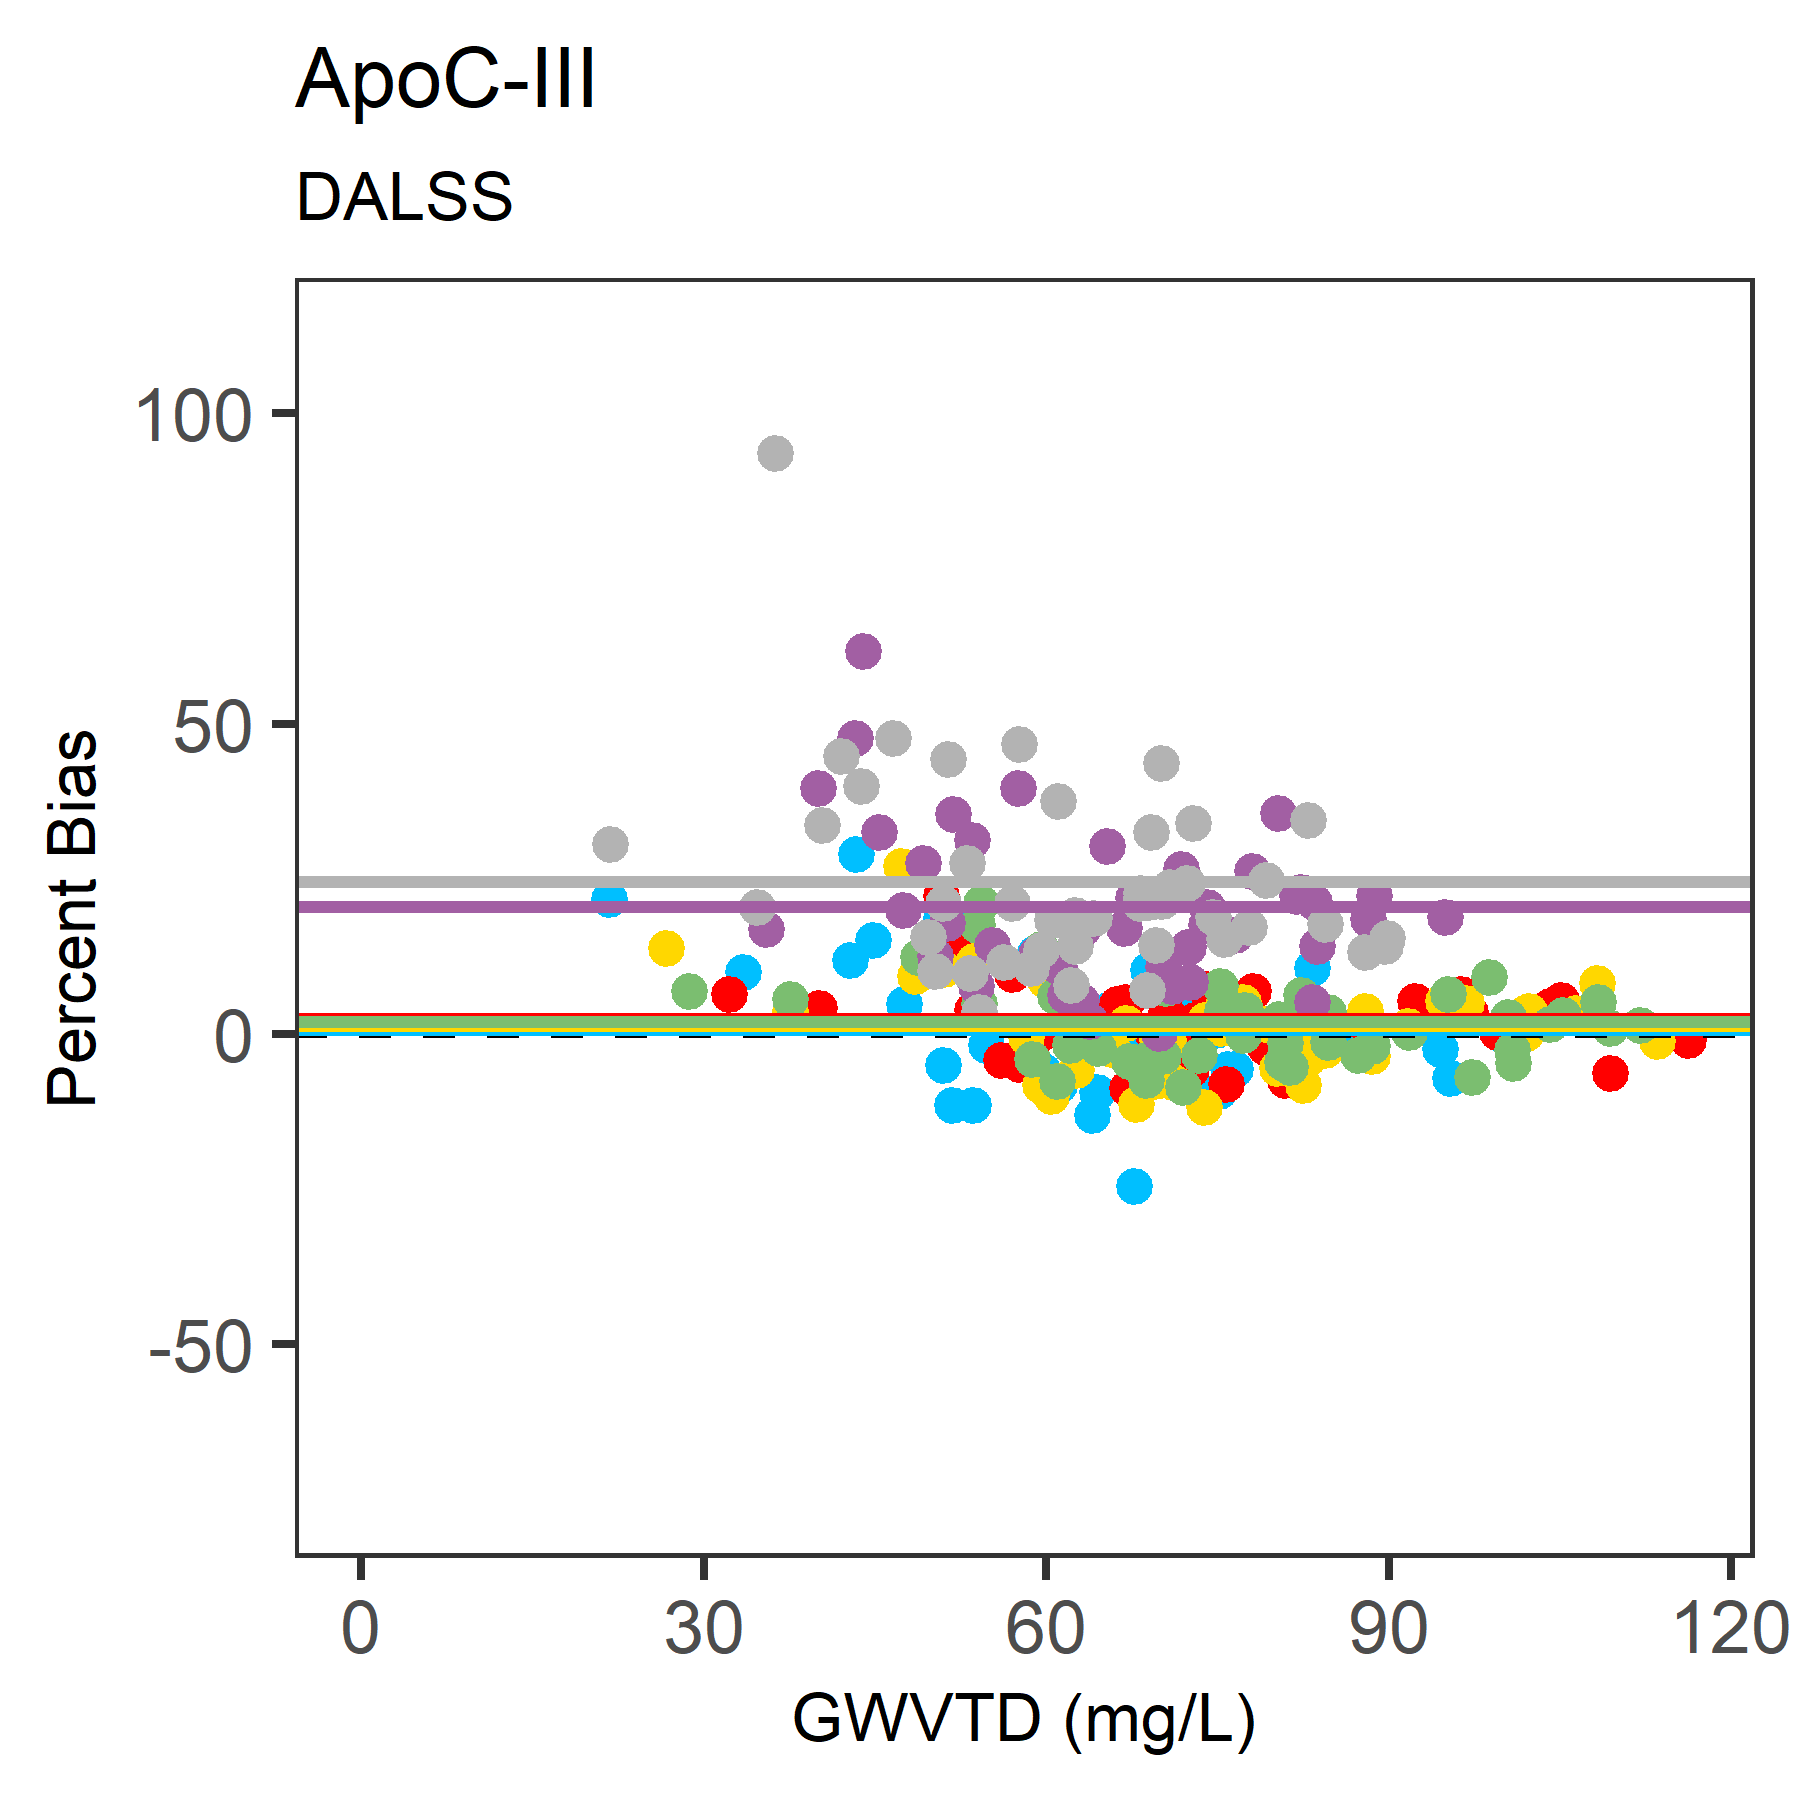

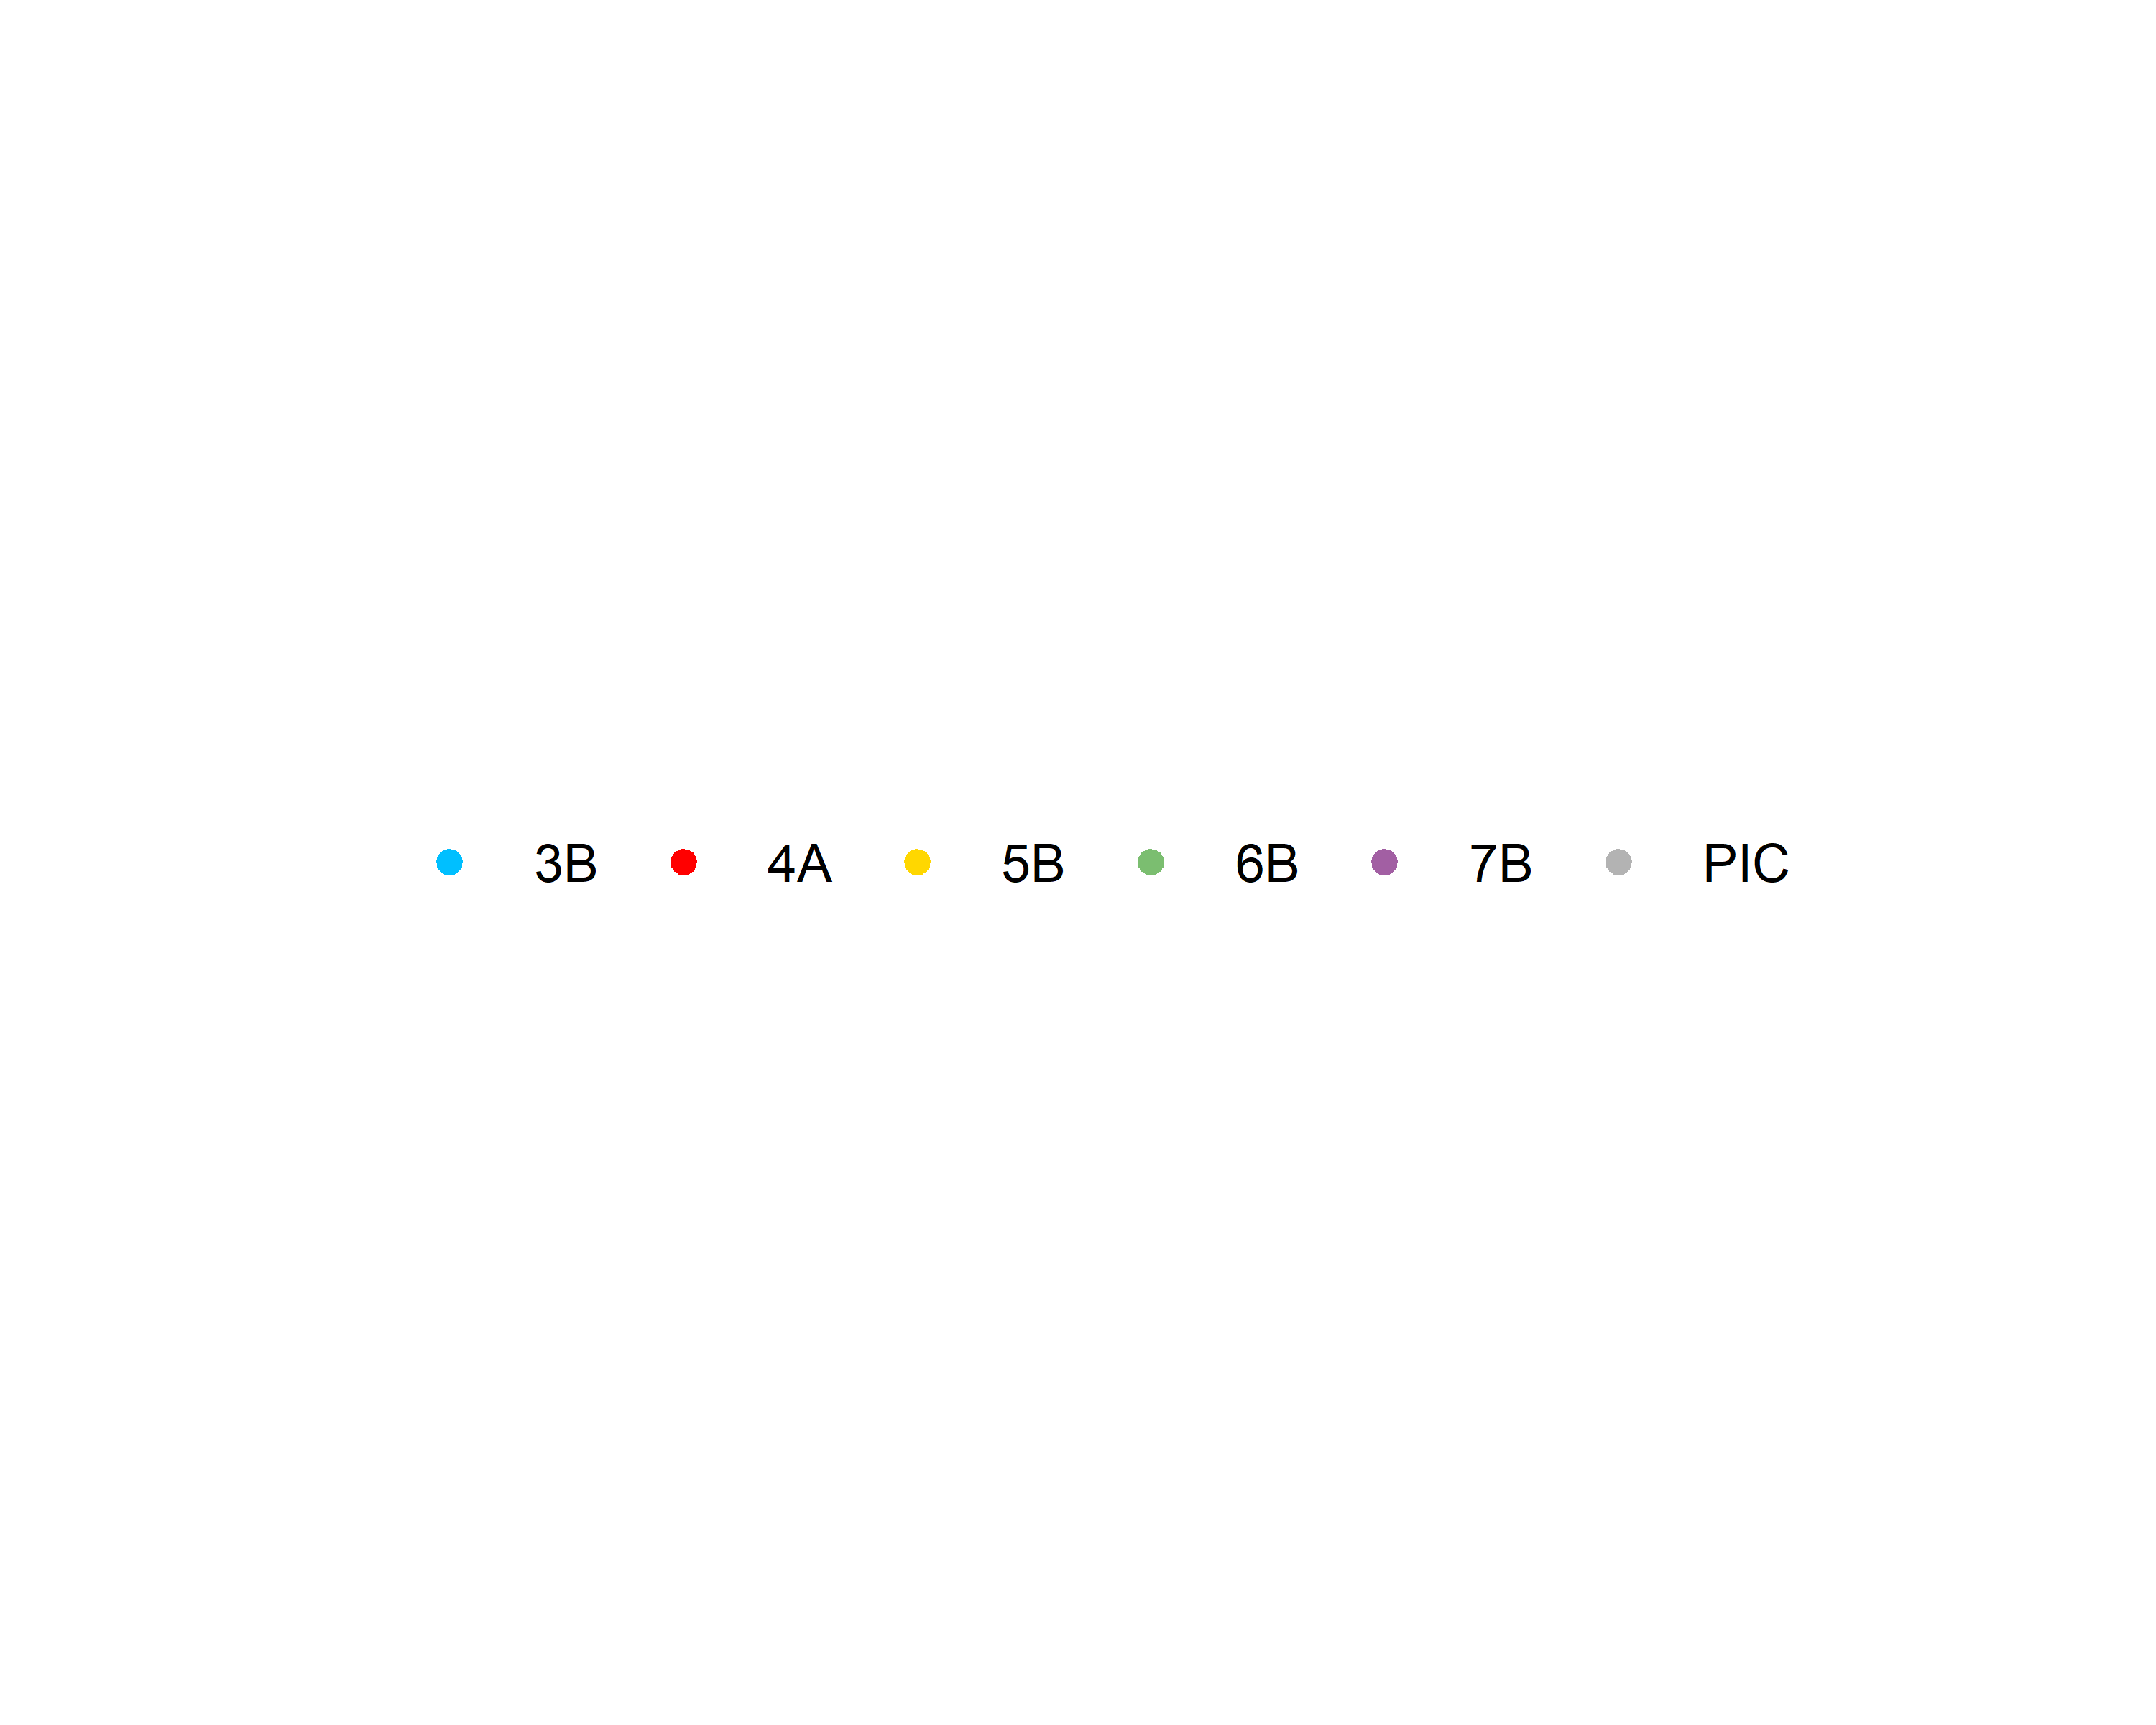


S1(B)


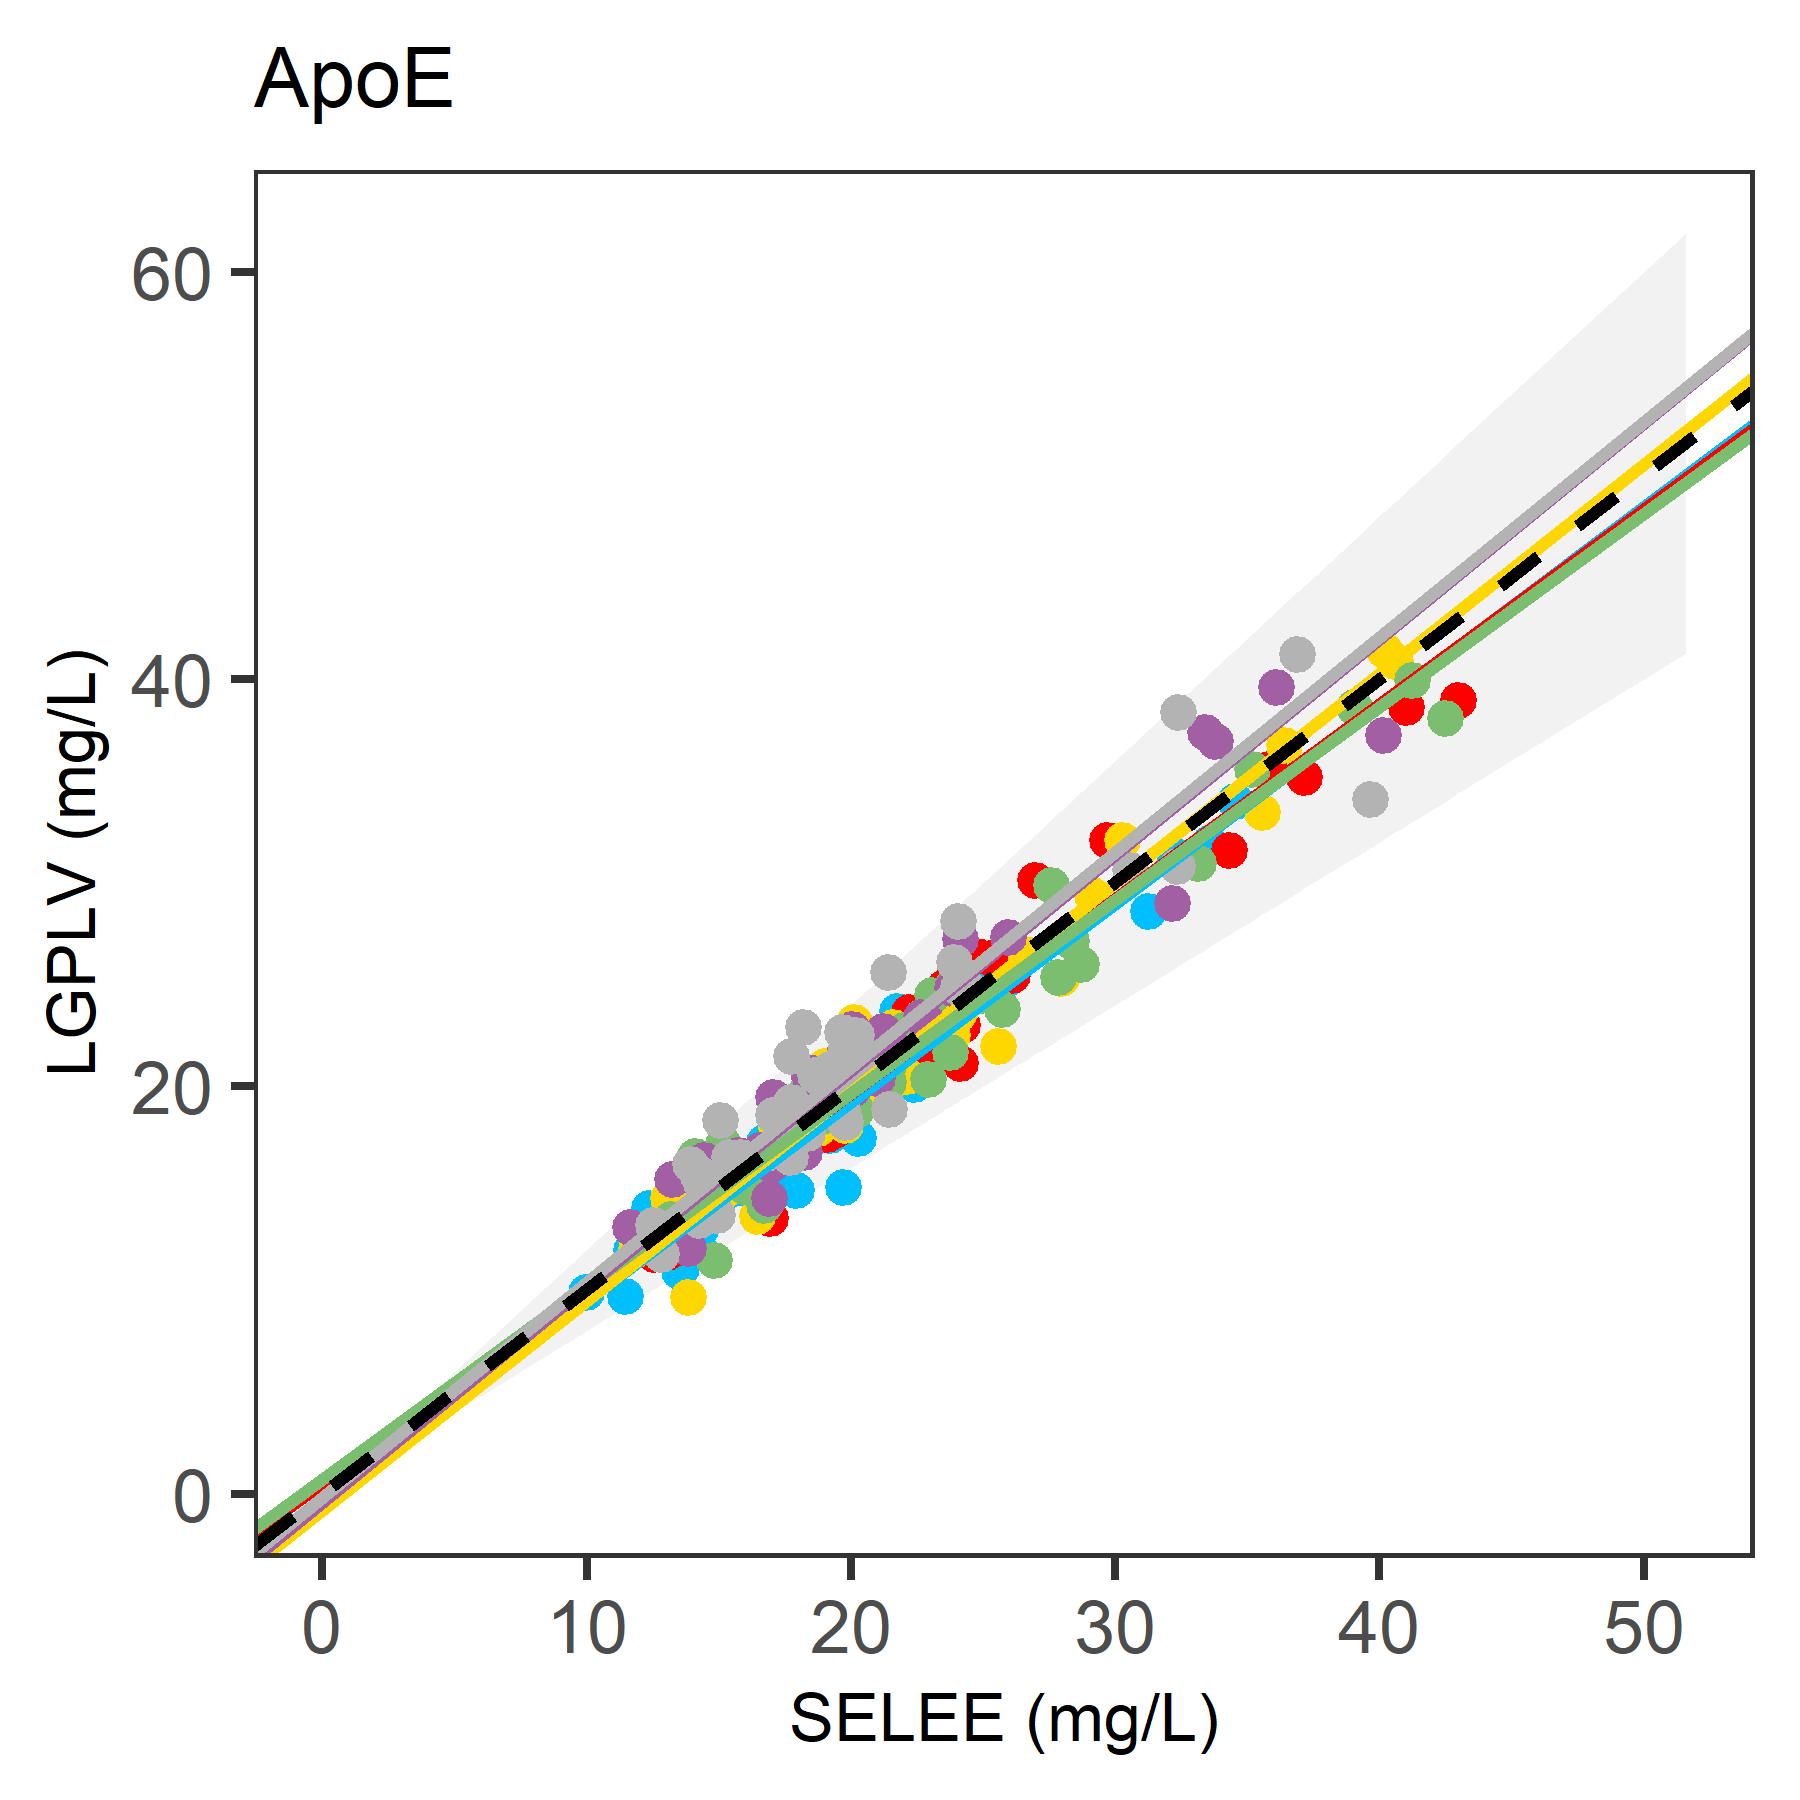

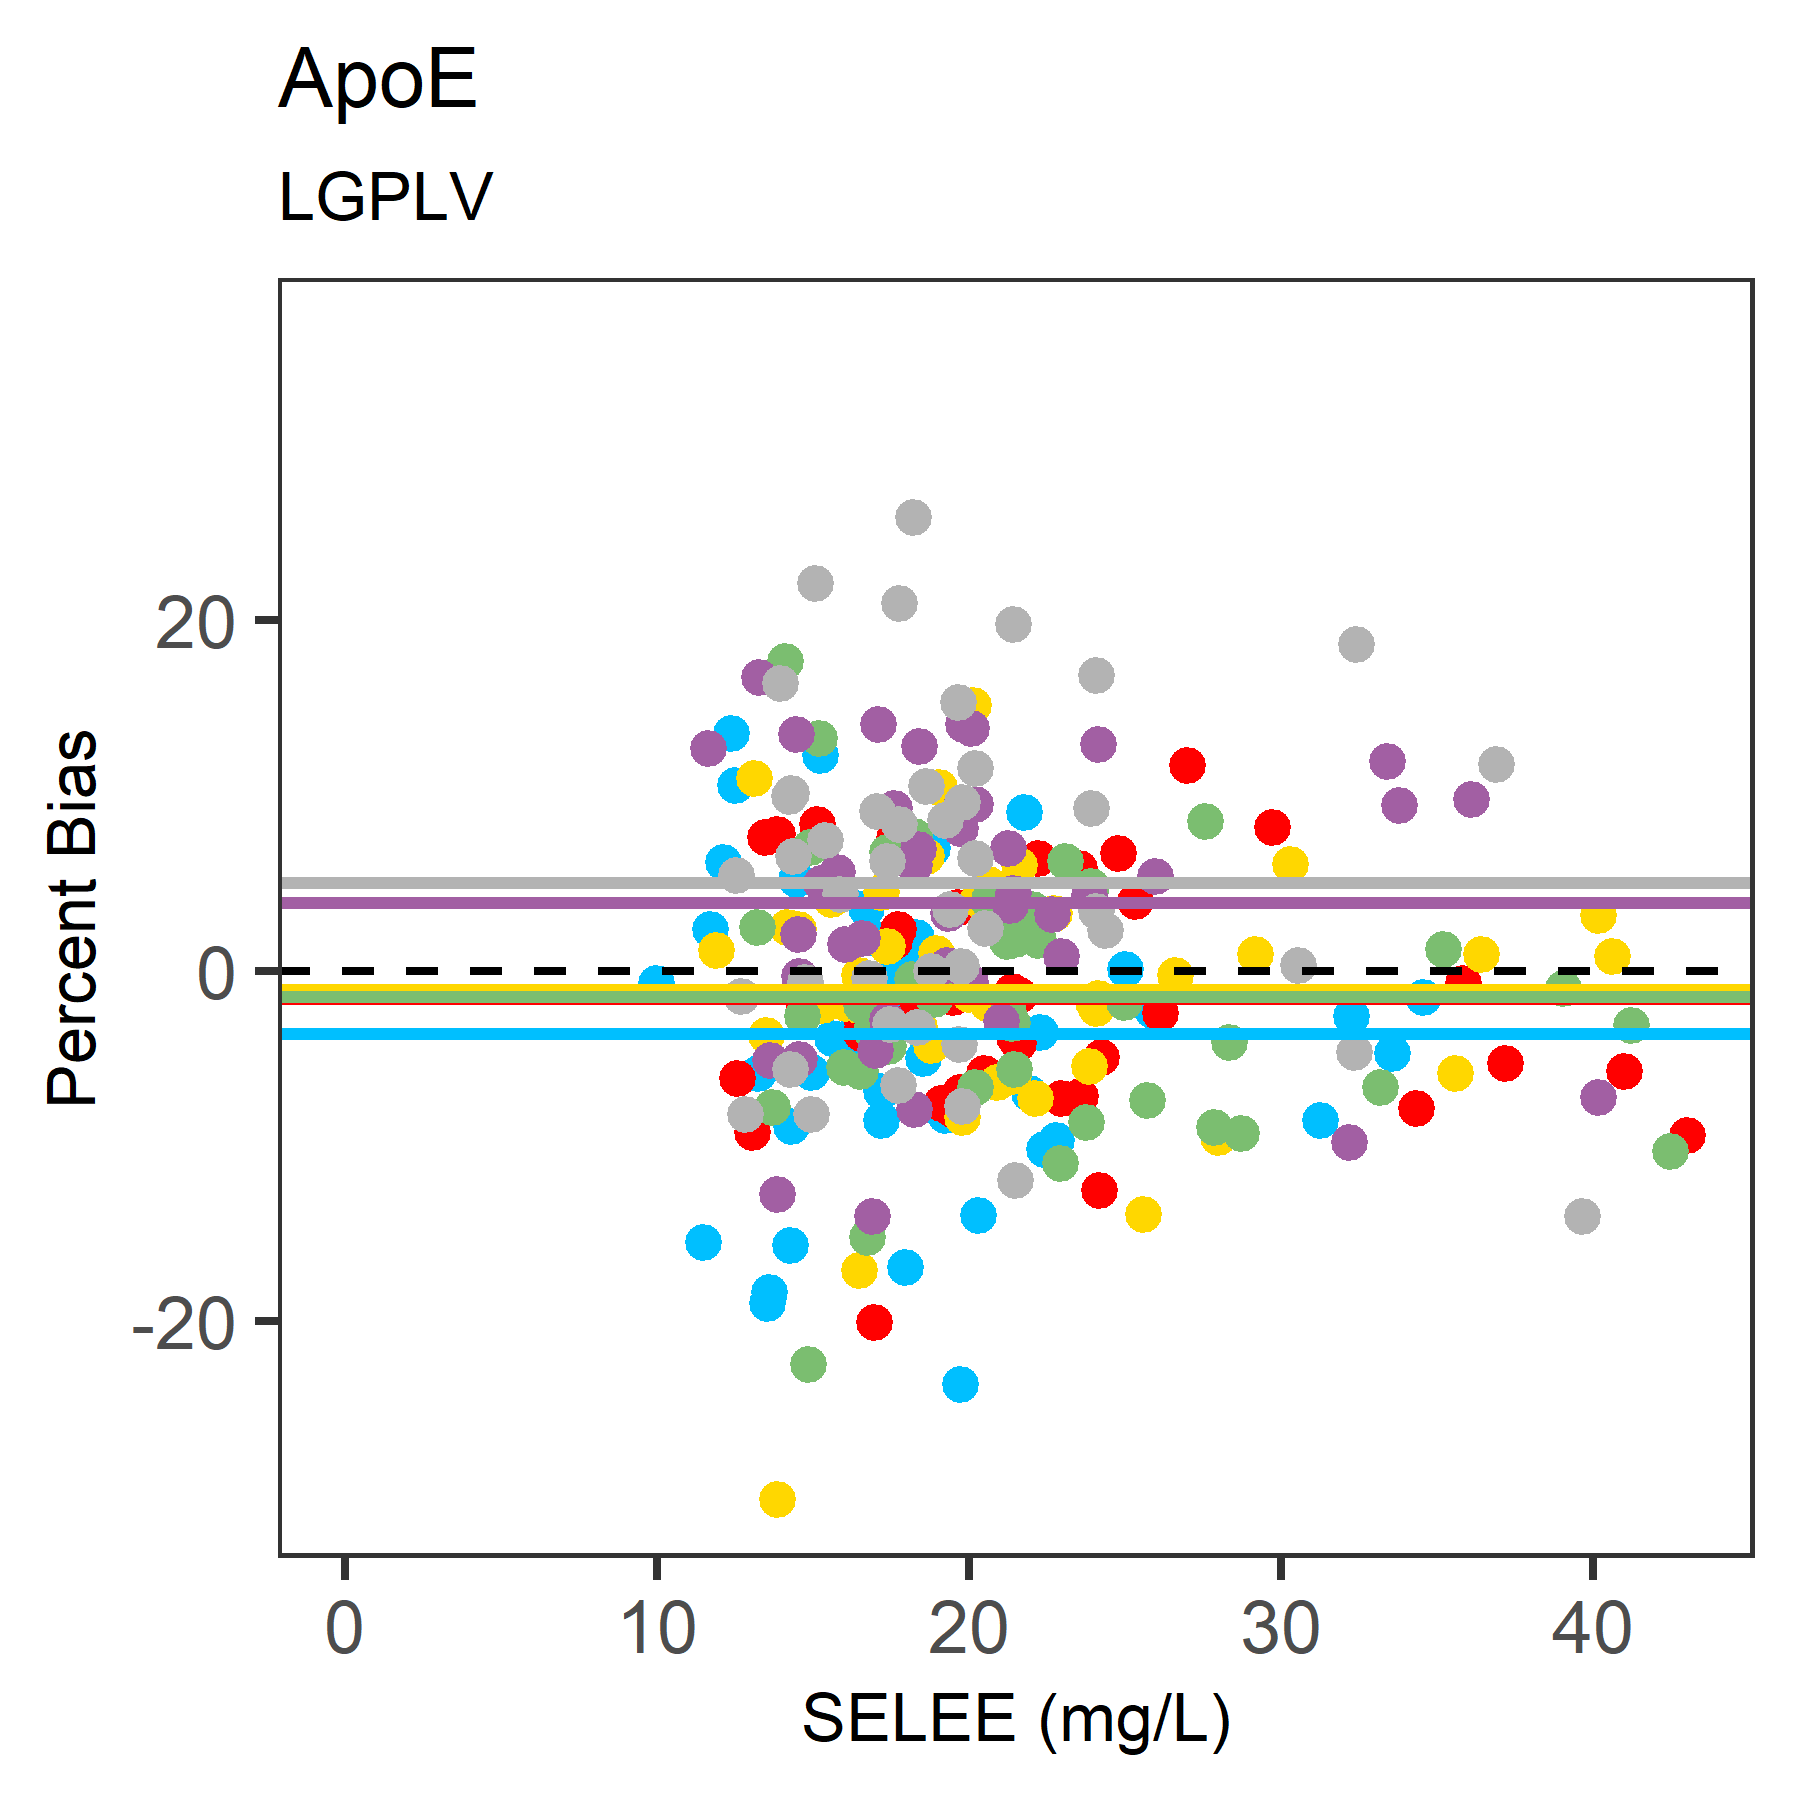


**Figure S1 (A):** Apo(a) GTYST, A-II (2x), A-IV (3x), B100 (FPEVD), C-I, C-II, C-III and E (all 2x), measured by QPMS. Deming regression results are shown for **matrix comparison** of the serum gel tubes 5B with the alternative matrices; serum (4A) and plasma (3B, 6B, 7B and PIC) tubes. Corresponding bias plots show the % bias for the alternative matrices compared to serum gel tubes (5B) . Dotted lines; line of equality. Grey area indicates total allowable error (TEa), 24.1% for apo(a), 11.6% for apoB and 20% for all other apos. **(S1B)** **Peptide comparison** showing Deming regression lines for the quantifying and confirmation peptides with the corresponding bias plots. Data for correlations (r), slopes and biases are summarized in Tables 1 and 2 of the main document.

ApoB, FPEVD (B100) slopes for sodium citrate < PIC< K2EDTA < lithium heparin < serum; Slopes for apoA-II SPELQ and EQLTP show strong deviation for both K2EDTA tubes (7B and PIC), even more than the sodium citrate tubes (3B). ApoA-IV slopes are all very close to 5B except for 3B. ApoE SELEE sodium citrate < K2EDTA and PIC < lithium heparin and serum.

| **ApoA-I** | Comparison of gel serum 5B vs | | | | | **ApoA-II** 5B vs | | | | | | **ApoA-IV** 5B vs | | | | | | |
| --- | --- | --- | --- | --- | --- | --- | --- | --- | --- | --- | --- | --- | --- | --- | --- | --- | --- | --- |
|  |  |  |  |  |  |  |  |  |  |  |  | |  |  |  |  |  |  | |
| AKPAL | 4A | 6B | 7B | PIC | 3B | SPELQ | 4A | 6B | 7B | PIC | 3B | | LEPYA | 4A | 6B | 7B | PIC | 3B | |
| Imprecision %CV | **5.3** |  |  |  |  |  | **4.0** |  |  |  |  | |  | **5.1** |  |  |  |  | |
| Bias % | 0.4 | −2.1 | −1.6 | −3.7 | −14.9 |  | 0.7 | −2.7 | −18.8 | −22.3 | −14.6 | |  | 0.8 | 0.2 | 1.1 | −2.6 | −14.9 | |
| TE* % | 9.2 | 10.9 | 10.4 | 12.5 | 23.7 |  | 7.4 | 9.3 | 25.5 | 29.0 | 21.2 | |  | 9.3 | 8.3 | 9.6 | 11.1 | 23.4 | |
| VQPYL |  |  |  |  |  | EQLTP |  |  |  |  |  | | LTPYA |  |  |  |  |  | |
| Imprecision %CV | **3,2** |  |  |  |  |  | **5,1** |  |  |  |  | |  | **6,2** |  |  |  |  | |
| Bias % | 0.8 | −2.5 | −13.7 | −15.1 | −14.7 |  | 1.7 | −1.9 | −19.6 | −21.0 | −13.6 | |  | 1.9 | 0.6 | −0.2 | −1.5 | −14.1 | |
| TE* % | 6.2 | 7.8 | 19.0 | 20.4 | 20.0 |  | 10.1 | 10.3 | 28.0 | 29.4 | 22.0 | |  | 12.1 | 9.6 | 10.3 | 11.7 | 24.2 | |
|  |  |  |  |  |  |  |  |  |  |  |  | | SLAPY |  |  |  |  |  | |
| Imprecision %CV |  |  |  |  |  |  |  |  |  |  |  | |  | **6,6** |  |  |  |  | |
| Bias % |  |  |  |  |  |  |  |  |  |  |  | |  | 1.8 | 0.1 | −1.5 | −0.9 | −14.6 | |
| TE* % |  |  |  |  |  |  |  |  |  |  |  | |  | 12.7 | 10.8 | 12.4 | 11.8 | 25.5 | |
|  |  |  |  |  |  |  |  |  |  |  |  | |  |  |  |  |  |  | |
| **Apo(a)** | 5B vs |  |  |  |  | **ApoB** | 5B vs |  |  |  |  | | **ApoC-I** | 5B vs |  |  |  |  | |
| LFLEP* | 4A | 6B | 7B | PIC | 3B | TGISP | 4A | 6B | 7B | PIC | 3B | | EFGNT | 4A | 6B | 7B | PIC | 3B | |
| Imprecision %CV | **7.1** |  |  |  |  |  | **2.8** |  |  |  |  | |  | **7.3** |  |  |  |  | |
| Bias % | 1.4 | −1.3 | −3.00 | −4.1 | −14.0 |  | 0.5 | −2.4 | −2.6 | −4.0 | −16.0 | |  | 2.0 | 3.1 | −5.0 | −6.0 | −12.6 | |
| TE* % | 13.0 | 13.0 | 14.7 | 15.7 | 25.7 |  | 5.1 | 7.0 | 7.2 | 8.5 | 20.5 | |  | 14.1 | 15.2 | 17.1 | 18.0 | 24.6 | |
| GISST* |  |  |  |  |  | TEVIP |  |  |  |  |  | |  |  |  |  |  |  | |
| Imprecision %CV | **11,5** |  |  |  |  |  | **2,4** |  |  |  |  | | TPDVS | **5,9** |  |  |  |  | |
| Bias % | 2.2 | 4.1 | −0.20 | −0.2 | −9.3 |  | −0.3 | −2.4 | −3.2 | −4.7 | −15.3 | |  | 1.0 | 1.9 | −4.7 | −6.9 | −12.5 | |
| TE* % | 16.8 | 23.0 | 19.1 | 19.1 | 28.2 |  | 3.7 | 6.4 | 7.2 | 8.7 | 19.3 | |  | 10.7 | 11.5 | 14.4 | 16.5 | 22.2 | |
| GTYST |  |  |  |  |  | FPEVD |  |  |  |  |  | |  |  |  |  |  |  | |
| Imprecision %CV | **5,9** |  |  |  |  |  | **3,6** |  |  |  |  | |  |  |  |  |  |  | |
| Bias % | 1.9 | −2.2 | −2.21 | −3.4 | −15.1 |  | −0.3 | −3.3 | −5.3 | −8.4 | −15.2 | |  |  |  |  |  |  | |
| TE* % | 11.6 | 11.9 | 11.9 | 13.1 | 24.8 |  | 6.2 | 9.2 | 11.3 | 14.3 | 21.1 | |  |  |  |  |  |  | |
|  |  |  |  |  |  |  |  |  |  |  |  | |  |  |  |  |  |  | |
| **ApoC-II** | 5B vs |  |  |  |  | **ApoC-III** | 5B vs |  |  |  |  | | **ApoE** | 5B vs |  |  |  |  | |
| ESLSS | 4A | 6B | 7B | PIC | 3B | GWVTD | 4A | 6B | 7B | PIC | 3B | | SELEE | 4A | 6B | 7B | PIC | 3B | |
| Imprecision %CV | **8.3** |  |  |  |  |  | **4.1** |  |  |  |  | |  | **3.8** |  |  |  |  | |
| Bias % | 0.8 | −0.1 | −2.5 | −3.2 | −26.8 |  | 1.5 | 1.7 | −14.6 | −17.7 | −11.3 | |  | 2.1 | 3.6 | −5.3 | −6.8 | −13.5 | |
| TE* % | 14.4 | 13.7 | 16.1 | 16.8 | 40.4 |  | 8.3 | 8.5 | 21.4 | 24.5 | 18.1 | |  | 8.4 | 9.9 | 11.7 | 13.2 | 19.9 | |
|  |  |  |  |  |  |  |  |  |  |  |  | |  |  |  |  |  |  | |
| TYLPA |  |  |  |  |  | DALSS |  |  |  |  |  | | LGPLV |  |  |  |  |  | |
| Imprecision %CV | **5,7** |  |  |  |  |  | **4,8** |  |  |  |  | |  | **6,5** |  |  |  |  | |
| Bias % | 3.1 | 3.5 | 2.0 | −2.6 | −23.8 |  | 2.7 | 2.3 | 1.5 | 0.5 | −12.1 | |  | 1.7 | 3.3 | −0.4 | −0.9 | −15.4 | |
| TE* % | 12.6 | 12.9 | 11.4 | 12.0 | 33.2 |  | 10.6 | 10.2 | 9.4 | 7.4 | 19.9 | |  | 12.5 | 14.0 | 11.1 | 11.6 | 26.2 | |
|  |  |  |  |  |  |  |  |  |  |  |  | |  |  |  |  |  |  | |

**Table ST3**; Total error values were calculated using bias values obtained for the matrix comparisons (Table 1) and EP15 imprecision CVs (% indicated in bold for 21 peptides). Imprecision was established with EP15 protocol performed for validation of the 9 apolipoproteins. EP15 results for the 9 apos confirmed the results published earlier for the original 6 apolipoproteins A-I, B, C-I, C-II, C-III and E(4). Total allowable error for apoA-I, B and (a) are 9.1, 11.6 and 24,1% respectively. All others were set to 20%. Peptides exceeding the TEa are indicated in yellow.


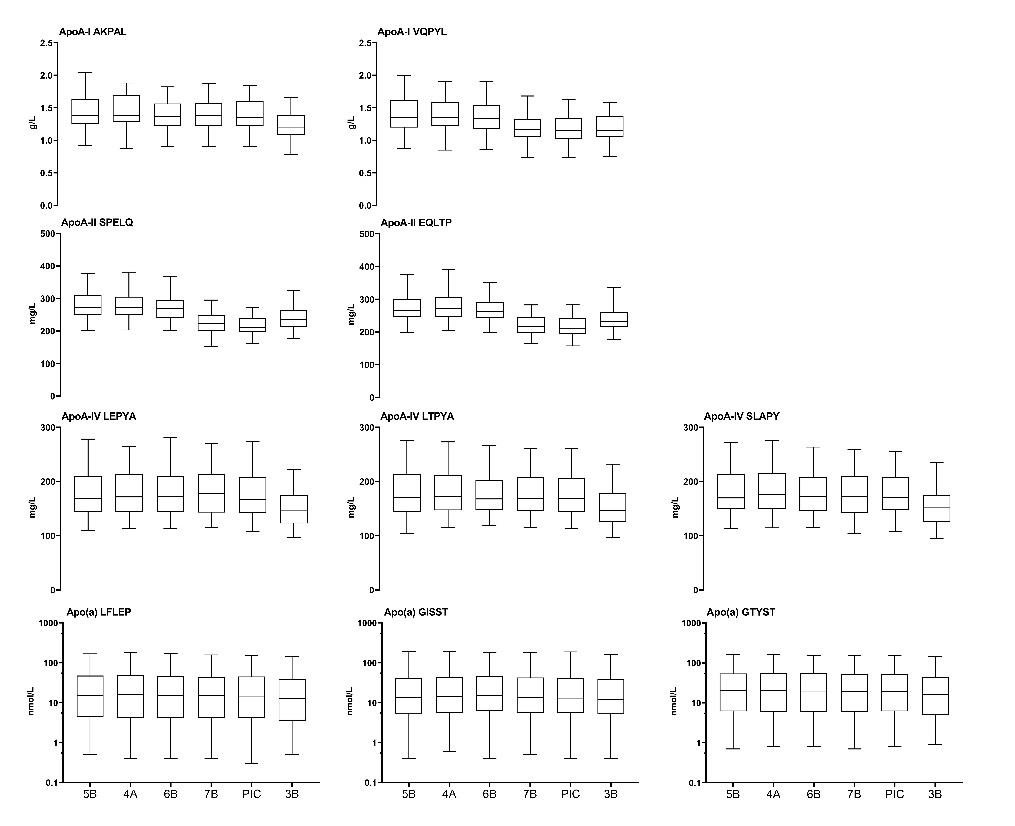


A


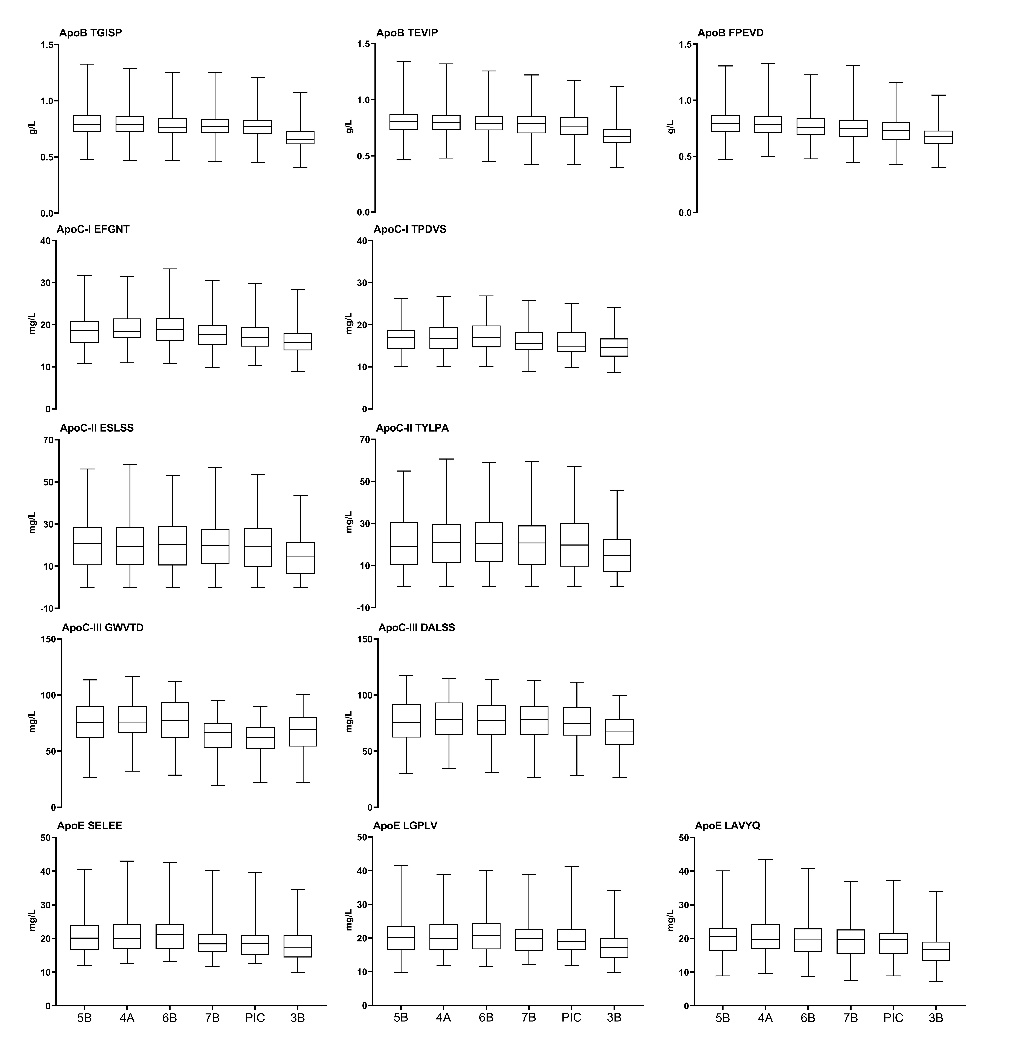


B

Figure S2.

**Figure S2;** Box and whisker plots show the distribution of apoA-I, A-II, A-IV and (a) (A) and for ApoB, C-I, C-II, C-III and E (B) for quantifying (left) and confirmation (middle and right) peptides showing the median, 25% and 75% percentile for the 45 donors in the 6 matrices (from left to right 5B, 4A, 6B, 7B, PIC and 3B). For apo(a) a log scale was used for the y-axis. Deviations for sodium citrate are indicated with blue ovals for all peptides and for K2EDTA and PIC with purple ovals for the confirmation peptide of apoA-I VQPYL, both peptides of apoA-II and GWVTD for apoC-III

Ad (a) and B: Except for the sodium citrate matrix (3B) similar results were found for serum (5B and 4A), lithium heparin (6B) and K2EDTA (7B and PIC).

For apoC-I; both peptides show slightly reduced values for K2EDTA matrix samples (7B + PIC). For apoC-II reduction is found for the sodium citrate matrix (3B).

Ad apoA-IV (left) and apoE (right); The quantitative peptide for apoE shows highest reduction in the K2EDTA samples (apart from sodium citrate 3B).

Statistics are summarized in Table ST4A and B below.

| Apo | Peptide |  | Serum  gel | Serum | Plasma  lithium heparin | Plasma K2EDTA | Plasma K2EDTA | Plasma  sodium citrate |
| --- | --- | --- | --- | --- | --- | --- | --- | --- |
| (a) | (nmol/L) |  | 5B | 4A | 6B | 7B | PIC | 9NC |
|  | LFLEP | mean | 31,5 | 31,5 | 31,0 | 29,9 | 29,8 | 26,4 |
|  |  | mean diff |  | 0,0 | 0,6 | 1,6 | 1,7 | 5,1 |
|  | GISST | mean | 32,3 | 32,1 | 32,6 | 31,2 | 31,5 | 28,0 |
|  |  | mean diff |  | 0,2 | -0,3 | 1,1 | 0,8 | 4,3 |
|  | GTYST | mean | 34,3 | 34,7 | 33,8 | 33,1 | 33,0 | 29,1 |
|  |  | mean diff |  | −0,4 | 0,5 | 1,2 | 1,3 | 5,2 |
| A-I | (g/L) |  |  |  |  |  |  |  |
|  | AKPAL | mean | 1,44 | 1,44 | 1,40 | 1,41 | 1,38 | 1,22 |
|  |  | mean diff |  | 0,00 | 0,04 | 0,03 | 0,06 | 0,22 |
|  | VQPYL | mean | 1,40 | 1,41 | 1,36 | 1,20 | 1,18 | 1,19 |
|  |  | mean diff |  | 0,00 | 0,04 | 0,20 | 0,22 | 0,21 |
| A-II | (mg/L) |  |  |  |  |  |  |  |
|  | SPELQ | mean | 280,0 | 281,3 | 272,2 | 225,8 | 216,1 | 238,8 |
|  |  | mean diff |  | −1,3 | 7,8 | 54,2 | 63,9 | 41,2 |
|  | EQLTP | mean | 274,0 | 278,6 | 267,8 | 219,6 | 215,4 | 236,6 |
|  |  | mean diff |  | −4,6 | 6,2 | 54,4 | 58,6 | 37,4 |
| A-IV | (mg/L) |  |  |  |  |  |  |  |
|  | LEPYA | mean | 181,4 | 182,1 | 181,2 | 182,8 | 176,3 | 153,9 |
|  |  | mean diff |  | −0,7 | 0,2 | −1,4 | 5,1 | 27,5 |
|  | LTPYA | mean | 180,5 | 182,8 | 179,9 | 178,7 | 176,8 | 154,3 |
|  |  | mean diff |  | −2,3 | 0,6 | 1,8 | 3,7 | 26,2 |
|  | SLAPY | mean | 182,0 | 183,8 | 181,0 | 178,6 | 179,0 | 154,4 |
|  |  | mean diff |  | −1,8 | 1,0 | 3,4 | 3,0 | 27,6 |
| B | (g/L) |  |  |  |  |  |  |  |
|  | TGISP | mean | 0,79 | 0,80 | 0,77 | 0,77 | 0,76 | 0,67 |
|  |  | diff |  | 0,00 | 0,02 | 0,02 | 0,03 | 0,13 |
|  | TEVIP | mean | 0,80 | 0,80 | 0,78 | 0,77 | 0,76 | 0,68 |
|  |  | diff |  | 0,00 | 0,02 | 0,03 | 0,04 | 0,12 |
|  | FPEVD | mean | 0,79 | 0,79 | 0,76 | 0,75 | 0,72 | 0,67 |
|  |  | diff |  | 0,00 | 0,03 | 0,04 | 0,07 | 0,12 |
| C-I | (mg/L) |  |  |  |  |  |  |  |
|  | EFGNT | mean | 19,0 | 19,2 | 19,4 | 17,8 | 17,6 | 16,5 |
|  |  | mean diff |  | −0,2 | −0,4 | 1,2 | 1,3 | 2,5 |
|  | TPDVS | mean | 17,0 | 17,1 | 17,2 | 16,1 | 15,7 | 14,8 |
|  |  | mean diff |  | −0,1 | −0,2 | 0,9 | 1,2 | 2,2 |
| C-II | (mg/L) |  |  |  |  |  |  |  |
|  | ESLSS | mean | 20,8 | 20,9 | 20,4 | 20,3 | 20,0 | 14,9 |
|  |  | mean diff |  | −0,1 | 0,4 | 0,5 | 0,8 | 5,9 |
|  | TYLPA | mean | 21,0 | 21,4 | 21,6 | 21,2 | 20,3 | 15,7 |
|  |  | mean diff |  | −0,4 | −0,6 | −0,2 | 0,7 | 5,3 |
| C-III | (mg/L) |  |  |  |  |  |  |  |
|  | GWVTD | mean | 76,2 | 76,8 | 77,2 | 64,7 | 62,3 | 67,5 |
|  |  | mean diff |  | −0,6 | −1,0 | 11,5 | 14,0 | 8,7 |
|  | DALLS | mean | 76,9 | 78,5 | 78,4 | 77,6 | 76,6 | 67,2 |
|  |  | mean diff |  | −1,6 | −1,4 | −0,6 | 0,3 | 9,7 |
| E | (mg/L) |  |  |  |  |  |  |  |
|  | SELEE | mean | 21,4 | 21,8 | 22,1 | 20,1 | 19,8 | 18,4 |
|  |  | mean diff |  | −0,4 | −0,7 | 1,3 | 1,6 | 3,0 |
|  | LGPLV | mean | 21,2 | 21,4 | 21,7 | 20,9 | 20,7 | 17,7 |
|  |  | mean diff |  | −0,2 | −0,5 | 0,3 | 0,5 | 3,5 |
|  | LAVYQ | mean | 20,6 | 20,9 | 20,6 | 19,9 | 19,5 | 16,8 |
|  |  | mean diff |  | −0,3 | 0,0 | 0,7 | 1,1 | 3,7 |

**Table ST4A;** Results of one-way ANOVA comparisons (means and mean differences) summarized for the nine apolipoproteins, 22 peptides and 6 matrices (as shown in box and whisker plots Fig S2).

| Quantifying peptides | |  |  |  |  |  |  |  |  |  |  |
| --- | --- | --- | --- | --- | --- | --- | --- | --- | --- | --- | --- |
|  |  |  | Apo(a) | ApoA-I | ApoA-II | ApoA-IV | ApoB | ApoC-I | ApoC-II | ApoC-III | ApoE |
| Serum | Tube |  | **LFLEP** | **AKPAL** | **SPELQ** | **LEPYA** | **TGISP** | **EFGNT** | **ESLSS** | **GWVTD** | **SELEE** |
| Gel | 5B | SST |  |  |  |  |  |  |  |  |  |
| No Gel | 4A | CAT | ns | ns | ns | ns | ns | ns | ns | ns | ns |
| Plasma |  |  |  |  |  |  |  |  |  |  |  |
| Lithium heparin | 6B | LH | ns | * | *** | ns | ** | ns | ns | ns | * |
| K2EDTA | 7B | K2E | ns | ns | **** | ns | *** | *** | ns | **** | **** |
| K2EDTA +PIC | PIC | P100 | ns | *** | **** | * | **** | **** | ns | **** | **** |
| Sodium citrate | 3B | 9NC | *** | **** | **** | **** | **** | **** | **** | **** | **** |
| Confirmation peptides | |  |  |  |  |  |  |  |  |  |  |
|  |  |  | Apo(a) | ApoA-I | ApoA-II | ApoA-IV | ApoB | ApoC-I | ApoC-II | ApoC-III | ApoE |
| Serum | Tube |  | **GISST** | **VQPYL** | **EQLTP** | **LTPYA** | **TEVIP** | **TPDVS** | **TYLPA** | **DALSS** | **LGPLV** |
| Gel | 5B | SST |  |  |  |  |  |  | - | - | - |
| No Gel | 4A | CAT | ns | ns | ns | ns | ns | ns | ns | ns | ns |
| Plasma |  |  |  |  |  |  |  |  |  |  |  |
| Lithium heparin | 6B | LH | ns | ** | ** | ns | ** | ns | ns | ns | ns |
| K2EDTA | 7B | K2E | ns | **** | **** | ns | **** | *** | ns | ns | ns |
| K2EDTA +PIC | PIC | P100 | ns | **** | **** | ns | **** | **** | ns | ns | ns |
| Sodium citrate | 3B | 9NC | ** | **** | **** | **** | **** | **** | **** | **** | **** |
| Additional peptides | |  |  |  |  |  |  |  |  |  |  |
|  |  |  | Apo(a) | ApoA-IV | ApoB | ApoE |  | Overall Results | |  |  |
| Serum | Tube |  | **GTYST** | **SLAPY** | **FPEVD** | **LAVYQ** |  | Serum |  | Tube | ns |
| Gel | 5B | SST |  |  |  |  |  | Gel |  | 5B |  |
| No Gel | 4A | CAT | ns | ns | ns | ns |  | No Gel |  | 4A | 22 |
| Plasma |  |  |  |  |  |  |  | Plasma |  |  |  |
| Lithium heparin | 6B | LH | ns | ns | *** | ns |  | Lithium heparin | | 6B | 14 |
| K2EDTA | 7B | K2E | * | ns | **** | ns |  | K2EDTA |  | 7B | 11 |
| K2EDTA +PIC | PIC | P100 | * | ns | **** | *** |  | K2EDTA +PIC | | PIC | 8 |
| Sodium citrate | 3B | 9NC | **** | **** | **** | **** |  | Sodium citrate | | 3B | 0 |

**Table ST4B;** Statistics for comparison of results One Way Anova with P value style (ns) 0.1234, (*) 0.0332, (**) 0.0021, (***) 0.0002, (****) < 0.0001

ApoA-I and B immunoassays in matrices 5B, 4A, 6B, 7B and
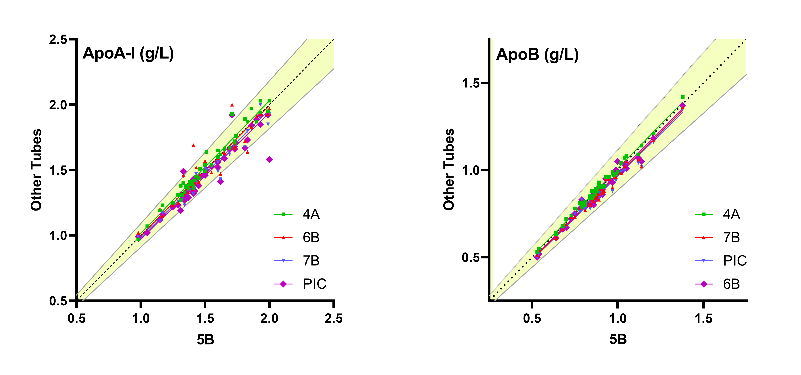


**Figure S3.** Top; Linear regression of **immunoturbidimetric measurements** of apoA-I and apoB in serum gel tubes (5B) as compared to other tubes of serum (4A) and plasma (6B, 7B and PIC). Dotted line (equality). Yellow area indicates TEa of 9.1% for apoA-I and 11.6% for apoB. Bottom; Box and whisker plots ApoA-I and ApoB measurements in the matrices 5B, 4A, 6B, 7B and PIC with immunoturbidimetric measurements (ITA) on a Cobas C502 analyzer.

|  | ApoA-I |  |  | ApoB |  |  |
| --- | --- | --- | --- | --- | --- | --- |
|  | Mean | Mean Diff | Slopes | Mean | Mean Diff | Slopes |
| 5B | 1.514 | - | - | 0.880 | - | - |
| 4A | 1.535 | −0.021 | 1.015 | 0.888 | −0.008 | 1.008 |
| 6B | 1.511 | 0.003 | 0.966 | 0.862 | 0.018 | 0.980 |
| 7B | 1.487 | 0.027 | 0.982 | 0.857 | 0.023 | 0.972 |
| PIC | 1.470 | 0.044 | 0.969 | 0.851 | 0.029 | 0.966 |

**Table ST5;** Results for the slopes of the linear regression comparisons to matrix 5B for the **ITA measurements** (as in Fig S3), and the means of apoA-I and B for the 44 samples in the different matrices and the (mean) differences compared to 5B as shown in the box and whisker plots for apoA-I and B results in the serum (5B and 4A) and plasma (6B, 7B and PIC) matrices for the 44 donors.

Digestion kinetics


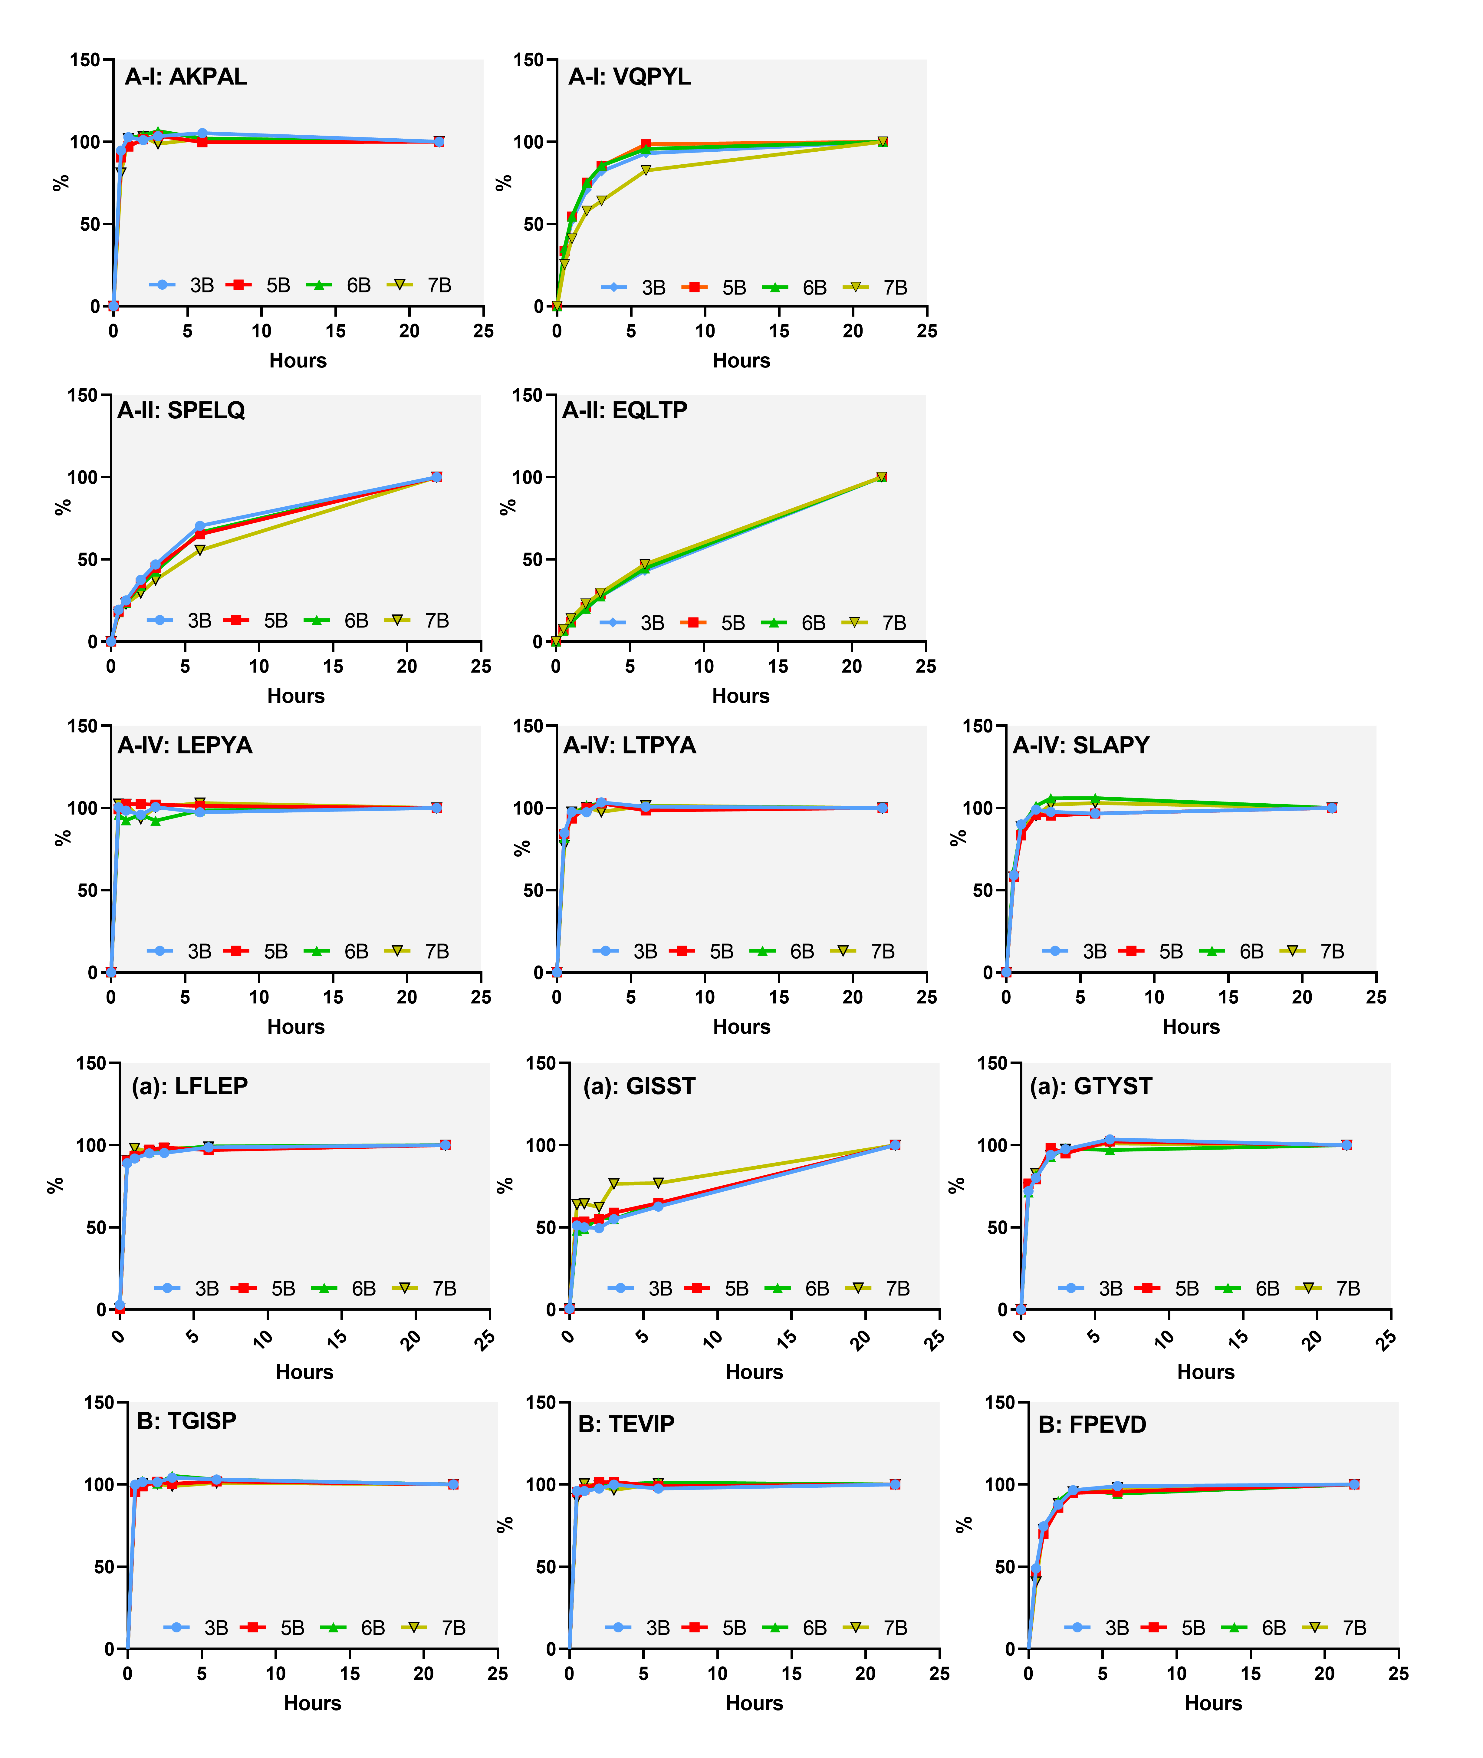


Figure S4(a)


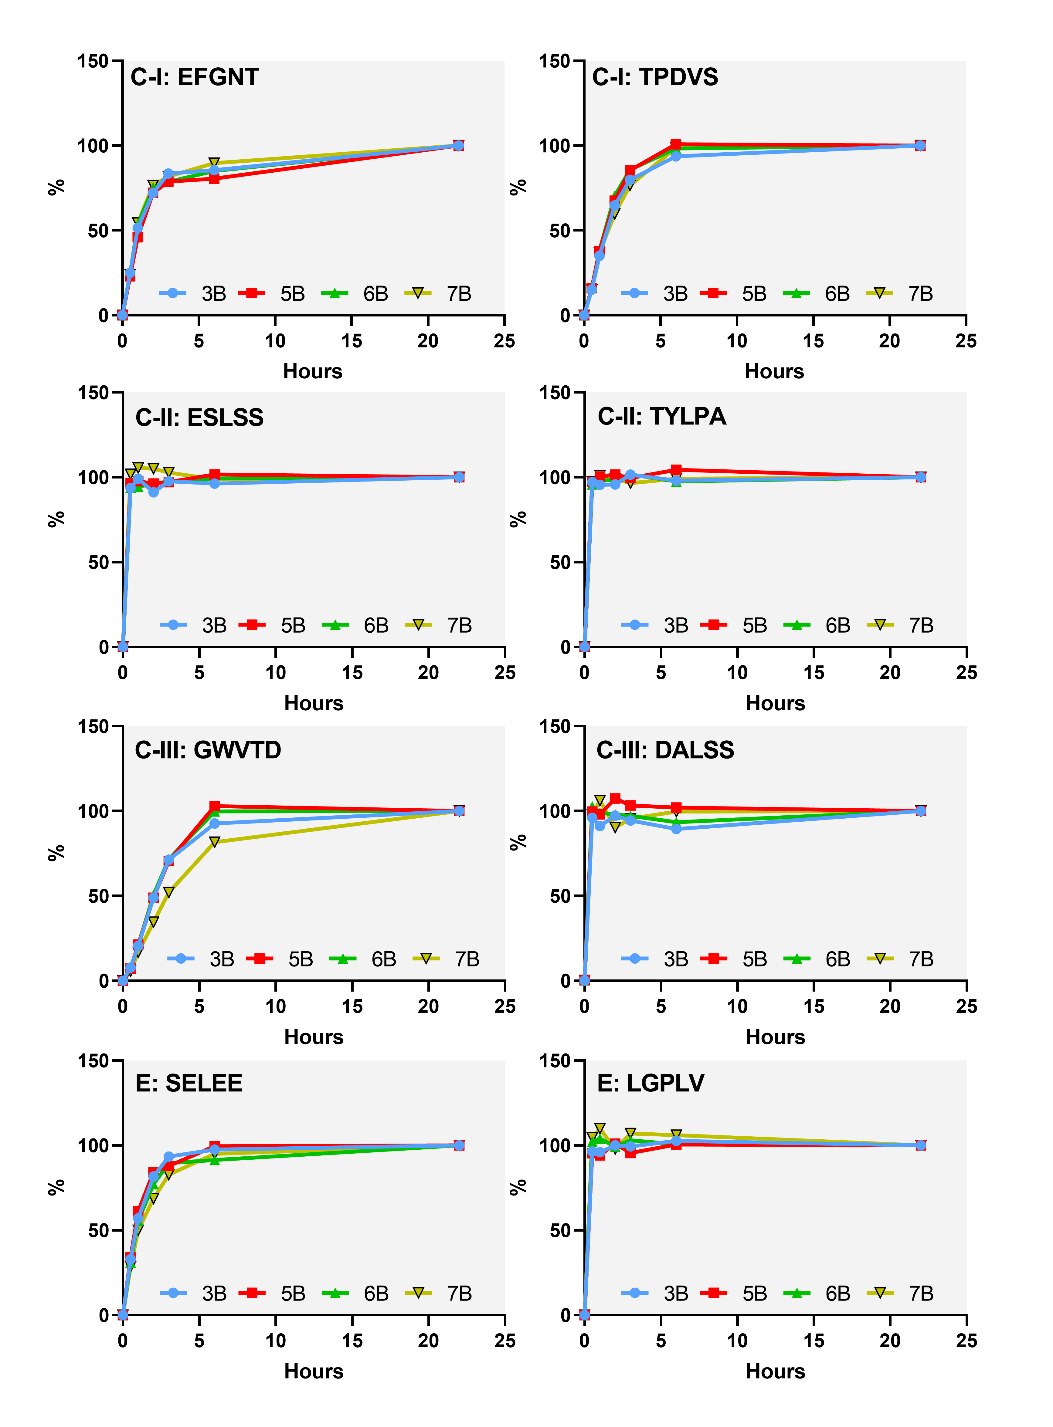


Figure S4(b)

**Figure S4;** Kinetics for trypsin digestion for nine apos in serum and plasma samples of six donor samples up to 22 hrs digestion time; left results for the quantification peptides and middle and right the confirmation/additional peptides All data are normalized to the relative responses (RR) at T=22 hrs (100%) for each matrix. **4(a)**; ApoA-I, A-II, A-IV, (a) and B, 4(b); ApoC-I, C-II, C-III and E

| Apo | 5B | 6B | 7B | 3B | 5B | 6B | 7B | 3B | 5B | 6B | 7B | 3B |
| --- | --- | --- | --- | --- | --- | --- | --- | --- | --- | --- | --- | --- |
| A-I | AKPAL |  |  |  | VQPYL |  |  |  |  |  |  |  |
| avge | 103.7 | 101.1 | 72.8 | 80.0 | 85.3 | 84.8 | 59.2 | 69.3 |  |  |  |  |
| sdev | 4.0 | 9.8 | 6.1 | 4.7 | 5.5 | 5.9 | 4.4 | 3.4 |  |  |  |  |
| A-II | SPELQ |  |  |  | EQLTP |  |  |  |  |  |  |  |
| avge | 45.0 | 42.8 | 31.8 | 37.5 | 28.8 | 27.9 | 19.8 | 24.0 |  |  |  |  |
| sdev | 3.5 | 2.3 | 1.8 | 3.4 | 1.8 | 1.2 | 1.8 | 1.4 |  |  |  |  |
| A-IV | LEPYA |  |  |  | LTPYA |  |  |  | SLAPY |  |  |  |
| avge | 102.0 | 96.3 | 96.8 | 85.9 | 102.8 | 104.2 | 89.1 | 86.8 | 95.4 | 100.7 | 95.9 | 82.2 |
| sdev | 3.3 | 13.1 | 4.7 | 13.4 | 5.1 | 8.1 | 4.9 | 6.8 | 9.9 | 11.2 | 10.3 | 8.1 |
| (a) | LFLEP |  |  |  | GISST |  |  |  | GTYST |  |  |  |
| avge | 98.5 | 90.8 | 88.6 | 79.9 | 58.9 | 55.3 | 55.9 | 50.9 | 95.1 | 94.8 | 89.8 | 80.2 |
| sdev | 5.6 | 6.6 | 5.1 | 4.3 | 22.7 | 16.6 | 17.4 | 17.6 | 7.4 | 12.0 | 12.9 | 9.9 |
| B | TGISP |  |  |  | TEVIP |  |  |  | FPEVD |  |  |  |
| avge | 100.4 | 99.1 | 92.9 | 83.7 | 101.5 | 97.7 | 94.6 | 100.3 | 94.9 | 94.9 | 84.8 | 77.6 |
| sdev | 3.9 | 5.8 | 4.7 | 3.6 | 5.0 | 4.1 | 6.8 | 39.2 | 4.8 | 5.3 | 2.1 | 5.2 |
| C-I | EFGNT |  |  |  | TPDVS |  |  |  |  |  |  |  |
| avge | 78.8 | 76.5 | 66.7 | 69.5 | 85.4 | 86.9 | 77.6 | 72.1 |  |  |  |  |
| sdev | 5.3 | 6.0 | 4.9 | 5.1 | 2.2 | 10.1 | 5.9 | 6.5 |  |  |  |  |
| C-II | ESLSS |  |  |  | TYLPA |  |  |  |  |  |  |  |
| avge | 97.2 | 101.5 | 87.6 | 84.4 | 99.6 | 103.9 | 93.7 | 87.7 |  |  |  |  |
| sdev | 8.7 | 10.6 | 9.1 | 10.0 | 6.0 | 9.9 | 8.5 | 4.0 |  |  |  |  |
| C-III | GWVTD |  |  |  | DALLS |  |  |  |  |  |  |  |
| avge | 70.5 | 73.9 | 47.8 | 62.8 | 103.3 | 106.5 | 97.6 | 89.8 |  |  |  |  |
| sdev | 5.3 | 10.3 | 4.9 | 10.1 | 5.7 | 8.0 | 11.0 | 6.8 |  |  |  |  |
| E | SELEE |  |  |  | LGPLV |  |  |  | LAVYQ |  |  |  |
| avge | 87.9 | 98.1 | 82.8 | 83.5 | 95.5 | 100.5 | 89.5 | 81.5 | 96.6 | 101.1 | 71.6 | 85.9 |
| sdev | 5.5 | 9.6 | 5.8 | 8.8 | 7.9 | 8.5 | 14.4 | 6.6 | 5.3 | 8.1 | 10.5 | 7.8 |

**Table ST6;** Digestion kinetics after 3 hours digestion; RR values at 3 hour timepoint of each of 6 donors calculated as % of the 22 hrs time point in the gel serum (5B) matrix. Averages of the six donors and standard deviations are shown for four matrices serum gel (5B), lithium heparin 96B), K2EDTA (7B) and sodium citrate (3B).

Normal incubation time for tryptic digestion for the multiplex apolipoprotein QPMS test is 3 hours. Digestion kinetics for the 6 donors at the 3 hour timepoint reveals that digestion is reduced for the K2EDTA matrix (7B) for both apoA-I peptides but especially VQPYL, both apoA-II peptides SPELQ and EQLTP are slowly formed and especially in the 7B matrix, for apoC-III the peptide formation of GWVTD is mostly delayed in matrix 7B. These are the peptides that also showed strongest deviation of results in the linear regression and peptide comparisons and strong bias in the EP comparisons.

Kwantificerende Peptiden

Kwalificerende Peptiden
